# Supplementary material
Source: Royal Society of Chemistry journal article supplement (doi:10.1039/d6qi01149g)
Supplement: d6qi01149g1.pdf [file d6qi01149g1.pdf]

## Ytterbium(II) phosphinidene complexes

Tingjun Li,<sup>a</sup> Qingqing Wen,<sup>a</sup> Thayalan Rajeshkumar,<sup>b</sup> Xiaojuan Liu,<sup>\*a</sup> Laurent Maron<sup>\*b</sup> and Yaofeng Chen<sup>\*a</sup>

<sup>a</sup>Spin-X Institute, School of Chemistry and Chemical Engineering, State Key Laboratory of Luminescent Materials and Devices, South China University of Technology, 381 Wushan Road, Guangzhou 510641, China

<sup>b</sup>LPCNO, CNRS, & INSA, Université Paul Sabatier, 135 Avenue de Ranguel, Toulouse 31077, France

### *Supporting Information*

#### Contents

|                                                                                         |      |
|-----------------------------------------------------------------------------------------|------|
| 1. General                                                                              | S2   |
| 2. Synthesis and characterization data of complexes <b>1–7</b>                          | S2   |
| 3. X-ray crystallography                                                                | S11  |
| 4. Molecular structure of complex <b>1</b>                                              | S16  |
| 5. NMR spectra of organic compounds and complexes <b>1–7</b>                            | S17  |
| 6. Formation of AdPh and AdH in the reaction of complex <b>4</b> with 10 equiv. of AdNC | S55  |
| 7. Magnetic measurements                                                                | S60  |
| 8. UV/vis/NIR spectra                                                                   | S61  |
| 9. Computation details                                                                  | S65  |
| 10. References                                                                          | S176 |

**General.** All manipulations were performed under an atmosphere of argon using Schlenk techniques or in a nitrogen-filled glovebox. THF, toluene, benzene, hexane, C<sub>6</sub>D<sub>6</sub>, *d*<sub>8</sub>-Toluene and *d*<sub>8</sub>-THF were dried over Na/K alloy, transferred under vacuum, and stored in the glovebox. YbI<sub>2</sub>(THF)<sub>2</sub>,<sup>1</sup> 2,2,2-nitrilotriacetyl chloride,<sup>2</sup> KCH<sub>2</sub>SiMe<sub>3</sub>,<sup>3</sup> DippPH<sub>2</sub>,<sup>4</sup> and 1,3,4,5-tetramethylimidazolin-2-ylidene<sup>5</sup> were synthesized following the literature procedures. 1-isocyanoadamantane(AdNC) was purchased from Bide Pharmatech Ltd and used without further purification. <sup>1</sup>H, <sup>13</sup>C{<sup>1</sup>H}, <sup>31</sup>P, and <sup>31</sup>P{<sup>1</sup>H} NMR spectra of organic compounds and complexes **1–4**, **6** and **7** were recorded on a Bruker AV III 400 spectrometer. <sup>1</sup>H, <sup>31</sup>P, <sup>31</sup>P{<sup>1</sup>H} solid-state NMR spectra of complex **5** were recorded on a JEOL ECZ-400R/M1 400 MHz spectrometer. Chemical shifts  $\delta$  were reported in ppm with references to the residual resonance of the deuterated solvents or SiMe<sub>4</sub> for proton and carbon chemical shifts, and to external H<sub>3</sub>PO<sub>4</sub> (85%) for phosphorus chemical shifts. <sup>171</sup>Yb{<sup>1</sup>H} NMR spectra of complexes **2** and **6** were recorded on a Bruker AV III 400 spectrometer and a Bruker AV III 500HD spectrometer, respectively, and the chemical shifts  $\delta$  were reported in ppm with reference to external [Yb(Cp\*)<sub>2</sub>(THF)<sub>2</sub>].<sup>6</sup> The assignment of <sup>1</sup>H and <sup>13</sup>C{<sup>1</sup>H} resonances was assisted with gCOSY, gHSQC and gHMBC spectra. Elemental analyses were performed on an Elementar UNICUBE CHN analyzer. Samples were prepared using tin boats in a argon-filled glove box. Calibration was done using standard reference material: acetanilide (C<sub>8</sub>H<sub>9</sub>NO: C, 71.09%; N, 10.36%; H, 6.71%) were used for C/H/N. UV/vis/NIR spectra were recorded on a Agilent Cary 5000 UV-Vis-NIR Spectrophotometer.

### **2,2,2-nitrilotrisacetyl piperidine:**

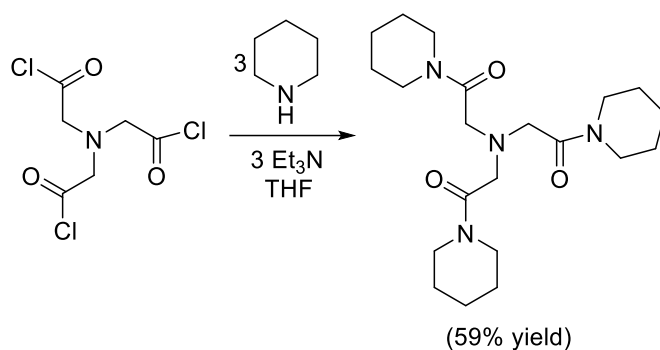

To a THF solution (30 mL) of piperidine (6.11 g, 71.8 mmol) and Et<sub>3</sub>N (7.27 g, 71.8 mmol) was added a THF solution (150 mL) of 2,2,2-nitrilotriacetyl chloride (5.90 g, 23.9 mmol) at 0 °C. The reaction solution was allowed to warm to room temperature and stirred for 12 h. The precipitate was moved by filtration, and the volatiles of the solution were removed under vacuum. The resulting oil was dissolved in DCM (20 mL), washed with saturated aqueous NH<sub>4</sub>Cl (10 mL × 3) and H<sub>2</sub>O (10 mL × 3). The organic layer was dried over anhydrous sodium sulfate. The volatiles were removed under vacuum to give 2,2,2-nitrilotrisacetylpiperidine as a white solid (5.50 g, 59% yield). <sup>1</sup>H NMR (400 MHz, C<sub>6</sub>D<sub>6</sub>, 25 °C): δ (ppm) 3.73 (s, 6H, NCH<sub>2</sub>C(O)N), 3.46 (m, 6H, NCH<sub>2</sub>CH<sub>2</sub>CH<sub>2</sub>), 3.19 (m, 6H, NCH<sub>2</sub>CH<sub>2</sub>CH<sub>2</sub>), 1.20 (m, 18H, NCH<sub>2</sub>CH<sub>2</sub>CH<sub>2</sub> and NCH<sub>2</sub>CH<sub>2</sub>CH<sub>2</sub>). <sup>13</sup>C{<sup>1</sup>H} NMR (100 MHz, C<sub>6</sub>D<sub>6</sub>, 25 °C): δ (ppm) 168.2 (NCH<sub>2</sub>C(O)N), 56.9 (NCH<sub>2</sub>C(O)N), 46.2 (NCH<sub>2</sub>CH<sub>2</sub>CH<sub>2</sub>), 42.7 (NCH<sub>2</sub>CH<sub>2</sub>CH<sub>2</sub>), 26.7 (NCH<sub>2</sub>CH<sub>2</sub>CH<sub>2</sub>), 25.9 (NCH<sub>2</sub>CH<sub>2</sub>CH<sub>2</sub>), 24.8 (NCH<sub>2</sub>CH<sub>2</sub>CH<sub>2</sub>).

**(Pip)<sub>3</sub>tren:**

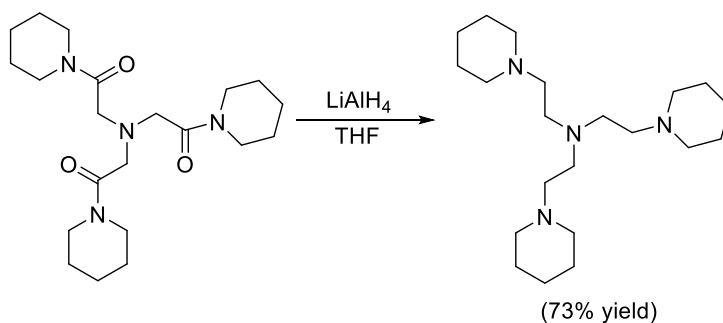

Tris(2-(piperidin-1-yl)ethyl)amine ((Pip)<sub>3</sub>tren)<sup>7</sup> was synthesized via a modified route by using 2,2,2-nitrilotrisacetylpiperidine as a starting material: A THF solution (50 mL) of 2,2,2-nitrilotrisacetylpiperidine (9.40 g, 23.9 mmol) was added to LiAlH<sub>4</sub> (9.09 g, 239 mmol) in 250 mL of THF at 0 °C. The reaction mixture was allowed to warm to room temperature and refluxed for 12 hours. Water (12 mL) was added dropwise to the mixture at 0 °C, and then 20% NaOH solution (124 mL) was added. The precipitate was moved by filtration, and the volatiles of the solution were removed under vacuum. The resulting oil was dissolved in DCM (20 mL) and washed with H<sub>2</sub>O (10 mL × 3). The organic layer was dried over anhydrous sodium sulfate. The volatiles were removed under vacuum to give (Pip)<sub>3</sub>tren as a yellow oil (6.10 g, 73% yield). <sup>1</sup>H NMR (400 MHz, C<sub>6</sub>D<sub>6</sub>, 25 °C): δ (ppm) 2.75 (dd, <sup>3</sup>J<sub>H-H</sub> = 8.3 Hz, <sup>3</sup>J<sub>H-H</sub> = 6.0 Hz, 6H, NCH<sub>2</sub>CH<sub>2</sub>N), 2.51 (dd, <sup>3</sup>J<sub>H-H</sub> = 8.3 Hz, <sup>3</sup>J<sub>H-H</sub> = 6.0 Hz, 6H, NCH<sub>2</sub>CH<sub>2</sub>N), 2.37 (m, 6H, NCH<sub>2</sub>CH<sub>2</sub>CH<sub>2</sub>), 1.54 (p, <sup>3</sup>J<sub>H-H</sub> = 5.6 Hz, 12H, NCH<sub>2</sub>CH<sub>2</sub>CH<sub>2</sub>), 1.34 (m, 6H, NCH<sub>2</sub>CH<sub>2</sub>CH<sub>2</sub>). <sup>13</sup>C{<sup>1</sup>H} NMR (100 MHz, C<sub>6</sub>D<sub>6</sub>, 25 °C): δ (ppm) 58.5 (NCH<sub>2</sub>CH<sub>2</sub>N), 55.5 (NCH<sub>2</sub>CH<sub>2</sub>CH<sub>2</sub>), 53.7 (NCH<sub>2</sub>CH<sub>2</sub>N), 26.7 (NCH<sub>2</sub>CH<sub>2</sub>CH<sub>2</sub>), 25.1 (NCH<sub>2</sub>CH<sub>2</sub>CH<sub>2</sub>).

**[(Pip)<sub>3</sub>trenYb(μ-I)]<sub>2</sub> (1):**

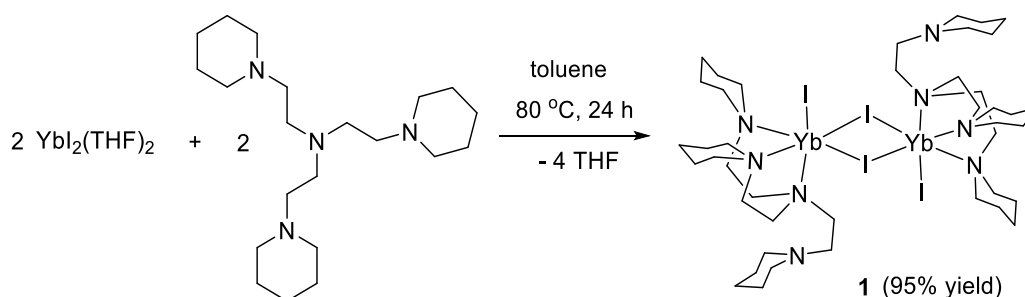

A toluene solution (2 mL) of (Pip)<sub>3</sub>tren (386 mg, 1.14 mmol) was added to YbI<sub>2</sub>(THF)<sub>2</sub> (600 mg, 1.04 mmol) in 8 mL of toluene at room temperature. The reaction mixture was stirred at

80 °C for 24 h, and then the volatiles were removed under vacuum. The residue was washed with hexane (5 mL × 3) and dried under vacuum to give complex **1** as a yellow solid (780 mg, 91% yield). <sup>1</sup>H NMR (400 MHz, CD<sub>2</sub>Cl<sub>2</sub>, 25 °C): δ (ppm) 3.07 (br, 12H, NCH<sub>2</sub>CH<sub>2</sub>N), 2.72 (br, 24H, NCH<sub>2</sub>CH<sub>2</sub>CH<sub>2</sub>), 2.60 (br, 12H, NCH<sub>2</sub>CH<sub>2</sub>N), 1.71 (br, 24H, NCH<sub>2</sub>CH<sub>2</sub>CH<sub>2</sub>), 1.48 (br, 12H, NCH<sub>2</sub>CH<sub>2</sub>CH<sub>2</sub>). <sup>13</sup>C{<sup>1</sup>H} NMR (100 MHz, CD<sub>2</sub>Cl<sub>2</sub>, 25 °C): δ (ppm) 55.1 (NCH<sub>2</sub>CH<sub>2</sub>CH<sub>2</sub>), 52.7 (overlapped with the residue solvent resonance of the deuterated solvent, NCH<sub>2</sub>CH<sub>2</sub>N), 47.1 (NCH<sub>2</sub>CH<sub>2</sub>N), 23.8 (NCH<sub>2</sub>CH<sub>2</sub>CH<sub>2</sub>), 22.9 (NCH<sub>2</sub>CH<sub>2</sub>CH<sub>2</sub>). The poor solubility made it difficult to record <sup>171</sup>Yb NMR spectrum of this complex. Anal. Calcd for C<sub>42</sub>H<sub>84</sub>I<sub>4</sub>N<sub>8</sub>Yb<sub>2</sub> · toluene: C, 35.73; H, 5.63; N, 6.80. Found: C, 35.24; H, 5.69; N, 7.12.

**(Pip)<sub>3</sub>trenYb(CH<sub>2</sub>SiMe<sub>3</sub>)<sub>2</sub> (2):** A benzene solution (1 mL) of KCH<sub>2</sub>SiMe<sub>3</sub> (97.4 mg, 0.78 mmol) was added to a suspension of complex **1** (300 mg, 0.39 mmol) in 2 mL of benzene at room temperature, resulting in a dark brown solution with gray precipitates. The reaction mixture was stirred for 5 minutes at room temperature, and then the solvent was removed under vacuum. The residue was stirred in 1 mL of hexane, and the volatiles were removed again under vacuum. This operation was repeated for three times to remove benzene completely, and then the residue was extracted with hexane (9 mL). The resulting solution was concentrated to about 3 mL and stood at -35 °C overnight. Complex **2** was isolated as a red solid (142 mg, 53% yield). <sup>1</sup>H NMR (400 MHz, C<sub>6</sub>D<sub>6</sub>, 25 °C): δ (ppm) 2.46 (m, 12H, NCH<sub>2</sub>CH<sub>2</sub>CH<sub>2</sub>), 2.28 (t, <sup>3</sup>J<sub>H-H</sub> = 5.4 Hz, 6H, NCH<sub>2</sub>CH<sub>2</sub>N), 2.09 (t, <sup>3</sup>J<sub>H-H</sub> = 5.4 Hz, 6H, NCH<sub>2</sub>CH<sub>2</sub>N), 1.50 (m, 12H, NCH<sub>2</sub>CH<sub>2</sub>CH<sub>2</sub>), 1.32 (m, 6H, NCH<sub>2</sub>CH<sub>2</sub>CH<sub>2</sub>), 0.52 (s, 18H, YbCH<sub>2</sub>SiMe<sub>3</sub>), -1.03 (s, 4H, YbCH<sub>2</sub>SiMe<sub>3</sub>). <sup>13</sup>C{<sup>1</sup>H} NMR (100 MHz, C<sub>6</sub>D<sub>6</sub>, 25 °C): δ (ppm) 53.7 (NCH<sub>2</sub>CH<sub>2</sub>CH<sub>2</sub>), 52.2 (NCH<sub>2</sub>CH<sub>2</sub>N), 49.0 (NCH<sub>2</sub>CH<sub>2</sub>N), 23.9 (NCH<sub>2</sub>CH<sub>2</sub>CH<sub>2</sub>), 23.4

(NCH<sub>2</sub>CH<sub>2</sub>CH<sub>2</sub>), 22.4 (YbCH<sub>2</sub>SiMe<sub>3</sub>), 5.8 (YbCH<sub>2</sub>SiMe<sub>3</sub>). <sup>171</sup>Yb{<sup>1</sup>H} NMR (71 MHz, C<sub>6</sub>D<sub>6</sub>, 25 °C): δ (ppm) 1204.7 (YbCH<sub>2</sub>SiMe<sub>3</sub>). Anal. Calcd for C<sub>29</sub>H<sub>64</sub>N<sub>4</sub>Si<sub>2</sub>Yb: C, 49.90; H, 9.24; N, 8.03. Found: C, 49.54; H, 9.18; N, 7.97.

**[Yb<sub>4</sub>(μ<sub>4</sub>-PDipp)(μ<sub>2</sub>-CH<sub>2</sub>SiMe<sub>3</sub>)<sub>2</sub>{μ<sub>2</sub>-P(H)Dipp}<sub>4</sub>(THF)<sub>4</sub>] (3a) and [Yb<sub>4</sub>(μ<sub>4</sub>-PDipp)<sub>2</sub>(μ<sub>2</sub>-CH<sub>2</sub>SiMe<sub>3</sub>)<sub>2</sub>{μ<sub>2</sub>-P(H)Dipp}<sub>2</sub>(THF)<sub>5</sub>] (3b):** To a hexane solution (2 mL) of **2** (100 mg, 0.14 mmol) was added a THF/hexane mixture (1:20) (0.5 mL) of DippPH<sub>2</sub> (35.2 mg, 0.18 mmol) at room temperature and stood for 15 minutes. After standing at -35 °C for 12 h, the resulting dark red crystalline solid was collected, washed with hexane (1 mL × 3), and dried under vacuum to afford complex **3a** (32.0 mg, 41% yield). The mother liquor was stored at -35 °C for two days to provide a red crystalline solid, which was collected, washed with cold hexane (1 mL), and dried under vacuum to give complex **3b** (23 mg, 15% yield).

**3a**, <sup>1</sup>H NMR (400 MHz, C<sub>6</sub>D<sub>6</sub>, 25 °C): δ (ppm) 7.36 (m, 2H, *m*-ArH of DippP), 7.28 (m, 1H, *p*-ArH of DippP), 7.13 (m, 4H, *m*-ArH of DippPH), 7.07 (m, 4H, *m*-ArH of DippPH), 7.02 (m, 2H, *p*-ArH of DippPH), 6.96 (m, 2H, *p*-ArH of DippPH), 4.84 (m, <sup>3</sup>J<sub>C-H</sub> = 6.8 Hz, 2H, CHMe<sub>2</sub> of DippP), 3.94 (m, <sup>3</sup>J<sub>C-H</sub> = 6.7 Hz, 4H, CHMe<sub>2</sub> of DippPH), 3.54 (m, 16H, CH<sub>2</sub>CH<sub>2</sub>OCH<sub>2</sub>CH<sub>2</sub>), 3.41 (m, <sup>3</sup>J<sub>C-H</sub> = 7.1 Hz, 6H, CHMe<sub>2</sub> of DippPH, DippPH and DippPH), 2.95 (1H, DippPH), 2.79 (1H, DippPH), 1.80 (d, <sup>3</sup>J<sub>C-H</sub> = 6.8 Hz, 12H, CHMe<sub>2</sub> of DippP), 1.49 (d, <sup>3</sup>J<sub>C-H</sub> = 6.7 Hz, 24H, CHMe<sub>2</sub> of DippPH), 1.25 (d, <sup>3</sup>J<sub>C-H</sub> = 7.1 Hz, 32H, CHMe<sub>2</sub> of DippPH and hexane-*H*), 1.08 (m, 16H, CH<sub>2</sub>CH<sub>2</sub>OCH<sub>2</sub>CH<sub>2</sub>), 0.89 (t, <sup>3</sup>J<sub>C-H</sub> = 6.9 Hz, 6H, hexane-*H*), 0.59 (s, 18H, YbCH<sub>2</sub>SiMe<sub>3</sub>), 0.51 (s, 4H, YbCH<sub>2</sub>SiMe<sub>3</sub>). <sup>31</sup>P{<sup>1</sup>H} NMR (162 MHz, C<sub>6</sub>D<sub>6</sub>, 25 °C): δ (ppm) 0.3 (m, DippP), -117.6 (m, <sup>1</sup>J<sub>Yb-PH</sub> = 535 Hz, <sup>2</sup>J<sub>PH-P</sub> = 48.6 Hz, <sup>2</sup>J<sub>PH-PH</sub> = 17.4 Hz, DippPH), -130.1 (m, <sup>1</sup>J<sub>Yb-PH</sub> = 502 Hz, <sup>2</sup>J<sub>PH-P</sub> = 64.8 Hz, <sup>2</sup>J<sub>PH-PH</sub> = 17.4 Hz, DippPH). <sup>31</sup>P NMR (162 MHz, C<sub>6</sub>D<sub>6</sub>,

25 °C):  $\delta$  (ppm) 0.3 (m, DippP), -117.6 (m,  $^1J_{P-H} = 261.9$  Hz, DippPH), -130.1 (m,  $^1J_{P-H} = 202.8$  Hz, DippPH). Poor solubility and instability made it difficult to record  $^{13}C\{^1H\}$  and  $^{171}Yb$  NMR spectra of this complex. Anal. Calcd for  $C_{84}H_{143}O_4P_5Si_2Yb_4 \cdot \text{hexane}$ : C, 48.99; H, 7.17. Found: C, 48.88; H, 7.08.

**3b**,  $^1H$  NMR (400 MHz,  $d_8$ -Toluene, -30 °C):  $\delta$  (ppm) 7.28 (d, 4H,  $^3J_{H-H} = 7.8$  Hz, *m*-ArH of DippP), 7.17 (t, 2H,  $^3J_{H-H} = 7.8$  Hz, *p*-ArH of DippP), 4.36 (m, 4H, CHMe<sub>2</sub> of DippP), 3.71 (m, 4H, CHMe<sub>2</sub> of DippP), 3.59 (d, 2H,  $^1J_{P-H} = 224.0$  Hz, DippPH), 3.45 (m, 20H, CH<sub>2</sub>CH<sub>2</sub>OCH<sub>2</sub>CH<sub>2</sub>), 1.72 (d, 24H,  $^3J_{H-H} = 6.7$  Hz, CHMe<sub>2</sub> of DippP), 1.24 (d, 24H,  $^3J_{H-H} = 6.7$  Hz, CHMe<sub>2</sub> of DippP), 1.17 (m, 20H, CH<sub>2</sub>CH<sub>2</sub>OCH<sub>2</sub>CH<sub>2</sub>), 0.29 (s, 18H, YbCH<sub>2</sub>SiMe<sub>3</sub>), -0.73 (s, 4H, YbCH<sub>2</sub>SiMe<sub>3</sub>).  $^{31}P\{^1H\}$  NMR (162 MHz,  $d_8$ -Toluene, -30 °C):  $\delta$  (ppm) -1.2 (m, DippP), -115.0 (m, DippPH).  $^{31}P$  NMR (162 MHz,  $d_8$ -Toluene, -30 °C):  $\delta$  (ppm) -1.2 (m, DippP), -115.1 (m,  $^1J_{P-H} = 224.0$  Hz, DippPH). Low solubility and instability made it difficult to record  $^{13}C\{^1H\}$  and  $^{171}Yb$  NMR spectra of this complex. Anal. Calcd for  $C_{76}H_{132}O_5P_4Si_2Yb_4 \cdot \text{hexane}$ : C, 47.25; H, 7.06. Found: C, 48.06; H, 6.87.

**[Yb<sub>5</sub>( $\mu_3$ -PDipp)<sub>2</sub>( $\mu_4$ -PDipp)<sub>2</sub>{ $\mu_2$ -P(H)Dipp}<sub>2</sub>(THF)<sub>5</sub>] (4)**: Complex **3a** (50.0 mg, 0.02 mmol) was dissolved in 1 mL of THF/hexane mixture (1:10) solution. After standing at room temperature for 48 h, a purple crystalline solid was isolated, washed with 0.5 mL of hexane, and dried under vacuum to afford complex **4** (25.0 mg, 58% yield).  $^1H$  NMR (400 MHz, C<sub>6</sub>D<sub>6</sub>, 25 °C):  $\delta$  (ppm) 7.19-7.09 (m, overlapped with the residue solvent resonance of the deuterated solvent, 10H, ArH of Dipp), 7.06 (d, 4H,  $^3J_{H-H} = 7.6$  Hz, *m*-ArH of DippP), 7.01 (t, 2H,  $^3J_{H-H} = 7.5$  Hz, *p*-ArH of DippP), 6.90 (t, 2H,  $^3J_{H-H} = 7.5$  Hz, *p*-ArH of DippP), 4.82 (m, 4H, CHMe<sub>2</sub> of DippP), 4.48 (m, 4H,  $^3J_{H-H} = 6.9$  Hz, CHMe<sub>2</sub> of DippP), 4.15 (m, 4H,  $^3J_{H-H} = 6.8$  Hz,

CHMe<sub>2</sub> of DippPH), 3.21 (d, 2H, <sup>1</sup>J<sub>P-H</sub> = 218.1 Hz, DippPH), 1.64 (m, 24H, CHMe<sub>2</sub> of DippP), 1.44 (d, 24H, <sup>3</sup>J<sub>H-H</sub> = 6.9 Hz, CHMe<sub>2</sub> of DippP), 1.38 (d, 24H, <sup>3</sup>J<sub>H-H</sub> = 6.8 Hz, CHMe<sub>2</sub> of DippPH). <sup>13</sup>C{<sup>1</sup>H} NMR (100 MHz, C<sub>6</sub>D<sub>6</sub>, 25 °C): δ (ppm) 155.5 (t, <sup>1</sup>J<sub>P-C</sub> = 23.9 Hz, *i*-ArC of DippP), 151.6 (t, <sup>1</sup>J<sub>P-C</sub> = 12.5 Hz, *i*-ArC of DippP), 150.7 (*o*-ArC of DippP), 150.3 (t, <sup>2</sup>J<sub>P-C</sub> = 2.9 Hz, *o*-ArC of DippPH), 149.8 (t, <sup>2</sup>J<sub>P-C</sub> = 4.9 Hz, *o*-ArC of DippP), 140.9 (t, <sup>1</sup>J<sub>P-C</sub> = 9.95 Hz, *i*-ArC of DippPH), 124.5 (*p*-ArC of DippPH), 122.8 (*m*-ArC of DippP), 122.3 (*m*-ArC of DippPH), 122.1 (*p*-ArC of DippP), 121.5 (*m*-ArC of DippP), 120.8 (*p*-ArC of DippP), 35.5 (CHMe<sub>2</sub> of DippP), 34.6 (t, <sup>3</sup>J<sub>P-C</sub> = 5.5 Hz, CHMe<sub>2</sub> of DippP), 33.8 (t, <sup>3</sup>J<sub>P-C</sub> = 5.6 Hz, CHMe<sub>2</sub> of DippPH), 25.0 (CHMe<sub>2</sub> of DippP), 24.4 (CHMe<sub>2</sub> of DippP), 24.2 (CHMe<sub>2</sub> of DippPH). <sup>31</sup>P{<sup>1</sup>H} NMR (162 MHz, C<sub>6</sub>D<sub>6</sub>, 25 °C): δ (ppm) 7.2 (m, <sup>1</sup>J<sub>Yb-P</sub> = 533 Hz, DippP), -20.1 (m, <sup>1</sup>J<sub>Yb-P</sub> = 703.9 Hz, DippP), -121.7 (m, <sup>1</sup>J<sub>Yb-PH</sub> = 488.4 Hz, DippPH). <sup>31</sup>P{<sup>1</sup>H} NMR (162 MHz, C<sub>6</sub>D<sub>6</sub>, 25 °C): δ (ppm) 7.2 (m, <sup>1</sup>J<sub>Yb-P</sub> = 533 Hz, DippP), -20.1 (m, <sup>1</sup>J<sub>Yb-P</sub> = 703.9 Hz, DippP), -121.06 (m, <sup>1</sup>J<sub>Yb-PH</sub> = 488.4 Hz, DippPH). <sup>31</sup>P NMR (162 MHz, C<sub>6</sub>D<sub>6</sub>, 25 °C): δ (ppm) 7.2 (m, <sup>1</sup>J<sub>Yb-P</sub> = 533 Hz, DippP), -20.1 (m, <sup>1</sup>J<sub>Yb-P</sub> = 703.9 Hz, DippP), -121.7 (m, <sup>1</sup>J<sub>Yb-PH</sub> = 488.4 Hz, <sup>1</sup>J<sub>P-H</sub> = 218.1 Hz, DippPH). The poor solubility made it difficult to record <sup>171</sup>Yb NMR spectra of this complex. Anal. Calcd for C<sub>92</sub>H<sub>144</sub>O<sub>5</sub>P<sub>6</sub>Yb<sub>5</sub>: C, 46.40; H, 6.10. Found: C, 46.77; H, 5.97.

**[Yb<sub>6</sub>P(μ<sub>3</sub>-PDipp)<sub>4</sub>(μ<sub>4</sub>-PDipp)<sub>2</sub>(IMe<sub>4</sub>)<sub>4</sub>] (5):** A benzene solution (2 mL) of 1,3,4,5-tetramethylimidazolin-2-ylidene (IMe<sub>4</sub>) (13.2 mg, 0.11 mmol) was added to **4** (50.0 mg, 0.021 mmol) in 2 mL of benzene at room temperature. After standing at 60 °C for 24 h, the resulting violet crystalline solid was collected, washed with toluene (1 mL × 3), and dried under vacuum to afford complex **5** (21.0 mg, 42% yield). <sup>31</sup>P solid-state NMR (162 MHz, 25 °C): δ (ppm) 12.4 (s, DippP), 6.5 (s, DippP) -20.8 (s, DippP). <sup>31</sup>P{<sup>1</sup>H} solid-state NMR (162 MHz, 25 °C): δ

(ppm) 12.3(s, DippP), 6.5 (s, DippP), -20.6 (s, DippP). Anal. Calcd for C<sub>100</sub>H<sub>150</sub>N<sub>8</sub>P<sub>6</sub>Yb<sub>6</sub> · 2 benzene: C, 47.29; H, 5.74; N, 3.94. Found: C, 47.43; H, 5.69; N, 3.76.

**Reaction of Complex 4 with 1 equiv. of AdNC:** A benzene solution (1 mL) of AdNC (4.8 mg, 0.03 mmol) was added to complex 4 (71.4 mg, 0.03 mmol) in 1 mL of benzene at room temperature. The reaction mixture was stood for 20 minutes at room temperature. The volatiles of the reaction solution were removed under vacuum, the residue was dissolved in hexane (1 mL). The hexane solution was stored at -35 °C for 12 h, the resulting purple crystalline solid was collected, washed with cold hexane (1 mL), and dried under vacuum to afford complex 6 (58.4 mg, 82% yield). <sup>1</sup>H NMR (400 MHz, C<sub>6</sub>D<sub>6</sub>, 25 °C): δ (ppm) 7.21-6.89 (m, overlapped with C<sub>6</sub>D<sub>6</sub>, ArH of DippP), 4.57 (m, 4H, CHMe<sub>2</sub> of DippP), 4.40 (m, 2H, CHMe<sub>2</sub> of DippP), 4.32 (m, 2H, CHMe<sub>2</sub> of DippP), 4.11 (m, 4H, CHMe<sub>2</sub> of DippP), 3.50 (d, 2H, <sup>1</sup>J<sub>P-H</sub> = 232.1 Hz, DippPH), 3.24 (m, 12H, CH<sub>2</sub>CH<sub>2</sub>OCH<sub>2</sub>CH<sub>2</sub>), 3.19 (d, 2H, <sup>1</sup>J<sub>P-H</sub> = 220.9 Hz, DippPH), 1.98 (m, 3H, NCCH<sub>2</sub>CHCH<sub>2</sub>), 1.83 (m, 6H, NCCH<sub>2</sub>CHCH<sub>2</sub>), 1.64-1.43 (m, 60H, CHMe<sub>2</sub> of DippP and NCCH<sub>2</sub>CHCH<sub>2</sub>), 1.40 (d, 12H, <sup>3</sup>J<sub>H-H</sub> = 6.8 Hz, CHMe<sub>2</sub> of DippP), 1.31 (m, 3H, NCCH<sub>2</sub>CHCH<sub>2</sub>), 1.06 (m, 12H, CH<sub>2</sub>CH<sub>2</sub>OCH<sub>2</sub>CH<sub>2</sub>). <sup>13</sup>C{<sup>1</sup>H} NMR (100 MHz, C<sub>6</sub>D<sub>6</sub>, 25 °C): δ (ppm) 154.7 (d, <sup>1</sup>J<sub>P-C</sub> = 39.6 Hz, *i*-ArC of DippP), 152.5 (d, <sup>2</sup>J<sub>P-C</sub> = 4.7 Hz, *o*-ArC of DippP), 151.2 (*o*-ArC of DippP), 150.0 (d, <sup>1</sup>J<sub>P-C</sub> = 12.0 Hz, *i*-ArC of DippP), 149.8 (*o*-ArC of DippP), 149.6 (d, <sup>2</sup>J<sub>P-C</sub> = 6.7 Hz, *o*-ArC of DippP), 146.5 (d, <sup>1</sup>J<sub>P-C</sub> = 113.4 Hz, PC(=NAd)), 140.6 (d, <sup>1</sup>J<sub>P-C</sub> = 16.6 Hz, *i*-ArC of DippP), 139.0 (d, <sup>1</sup>J<sub>P-C</sub> = 17.2 Hz, *i*-ArC of DippP), 126.1 (*p*-ArC of DippP), 124.6 (*p*-ArC of DippP), 123.2 (*m*-ArC of DippP), 122.7 (*m*-ArC of DippP), 122.6 (*m*-ArC of DippP), 122.4 (*m*-ArC of DippP), 121.7 (*p*-ArC of DippP), 121.0 (*p*-ArC of DippP), 69.1 (CH<sub>2</sub>CH<sub>2</sub>OCH<sub>2</sub>CH<sub>2</sub>), 59.4 (NCCH<sub>2</sub>CHCH<sub>2</sub>), 42.7 (NCCH<sub>2</sub>CHCH<sub>2</sub>), 36.8

(NCCH<sub>2</sub>CHCH<sub>2</sub>), 35.5 (CHMe<sub>2</sub> of DippP), 34.6 (m, CHMe<sub>2</sub> of DippP), 34.4 (d, <sup>3</sup>J<sub>P-C</sub> = 9.2 Hz, CHMe<sub>2</sub> of DippP), 33.7 (d, <sup>3</sup>J<sub>P-C</sub> = 9.9 Hz, CHMe<sub>2</sub> of DippP), 30.5 (NCCH<sub>2</sub>CHCH<sub>2</sub>), 26.5 (CHMe<sub>2</sub> of DippP), 25.1 (CH<sub>2</sub>CH<sub>2</sub>OCH<sub>2</sub>CH<sub>2</sub>), 24.9 (CHMe<sub>2</sub> of DippP), 24.3 (CHMe<sub>2</sub> of DippP), 24.2 (CHMe<sub>2</sub> of DippP), 23.7 (CHMe<sub>2</sub> of DippP), 22.5 (CHMe<sub>2</sub> of DippP). <sup>31</sup>P{<sup>1</sup>H} NMR (162 MHz, C<sub>6</sub>D<sub>6</sub>, 25 °C): δ (ppm) 3.9 (m, DippP), -29.7 (m, DippP), -115.1 (m, <sup>1</sup>J<sub>Yb-P</sub> = 543.7 Hz, DippPH), -125.4 (m, <sup>1</sup>J<sub>Yb-P</sub> = 495.6 Hz, DippPH). <sup>31</sup>P NMR (162 MHz, C<sub>6</sub>D<sub>6</sub>, 25 °C): δ (ppm) 3.9 (m, <sup>1</sup>J<sub>Yb-P</sub> = 544.3 Hz), -29.7 (m, DippP), -115.1 (m, <sup>1</sup>J<sub>Yb-P</sub> = 543.7 Hz, <sup>1</sup>J<sub>P-H</sub> = 232.1 Hz, DippPH), -125.4 (m, <sup>1</sup>J<sub>Yb-P</sub> = 495.6 Hz, <sup>1</sup>J<sub>P-H</sub> = 220.9 Hz, DippPH). <sup>171</sup>Yb{<sup>1</sup>H} NMR (87 MHz, C<sub>6</sub>D<sub>6</sub>, 25 °C): δ (ppm) 1286.9 (qd, <sup>1</sup>J<sub>PH-Yb</sub> = 269.7 Hz, <sup>1</sup>J<sub>P-Yb</sub> = 579.4 Hz, Yb(μ<sub>4</sub>-Pdipp)<sub>2</sub>(μ<sub>2</sub>-Pdipp)(μ<sub>2</sub>-PHdipp) and Yb(μ<sub>4</sub>-Pdipp)<sub>2</sub>(μ<sub>3</sub>-Pdipp)(μ<sub>2</sub>-PHdipp)), 1241.4 (m, Yb(μ<sub>4</sub>-Pdipp)(μ<sub>3</sub>-Pdipp)(μ<sub>2</sub>-Pdipp) and Yb(μ<sub>4</sub>-Pdipp)(μ<sub>3</sub>-Pdipp)), 981.8 (p, <sup>1</sup>J<sub>P-Yb</sub> = 529.8 Hz, Yb(μ<sub>4</sub>-Pdipp)<sub>2</sub>(μ<sub>2</sub>-PHdipp)<sub>2</sub>). Anal. Calcd for C<sub>95</sub>H<sub>143</sub>NO<sub>3</sub>P<sub>6</sub>Yb<sub>5</sub>: C, 47.58; H, 6.01; N, 0.58. Found: C, 47.84; H, 5.75; N, 0.73.

**Reaction of Complex 4 with 10 equiv. of AdNC:** A benzene solution (1 mL) of AdNC (48.4 mg, 0.3 mmol) was added to complex 4 (71.4 mg, 0.03mmol) in 1 mL of benzene at room temperature. The reaction mixture was stirred for 24 h at room temperature, and then the solvent was removed under vacuum. The residue was washed with hexane (1 mL × 3) and dried under vacuum to give complex 7 as a dark green solid (46 mg, 41% yield). This complex is paramagnetic. <sup>1</sup>H NMR (400 MHz, C<sub>6</sub>D<sub>6</sub>, 25 °C): δ (ppm) 40.07, 34.04, 33.26, 30.68, 22.19, 21.08, 19.99, 16.38, 14.75, 10.50, 2.49, -3.23, -3.98, -4.69, -6.79, -7.61, -9.30, -9.42, -10.57, -11.39, -12.02, -15.57, -16.89, -16.92, -21.01, -21.46, -25.62, -38.15, -38.76, -69.37. Anal. Calcd for C<sub>114</sub>H<sub>158</sub>N<sub>6</sub>P<sub>4</sub>Yb<sub>3</sub> · 0.5 hexane: C, 61.13; H, 7.24; N, 3.66. Found: C, 61.55; H, 7.66;

N, 3.82.

### **X-ray Crystallography:**

Single crystals of **1** suitable for single-crystal X-ray diffraction were grown by slow evaporation of toluene solution at room temperature, those of **2**, **3a**, **3b** and **6** were from hexane solutions at -35 °C, those of **4** were by slow evaporation of hexane solution at room temperature, those of **5** were by slow evaporation of benzene solution at room temperature, those of **7** were from slow evaporation the hexane/toluene mixture at room temperature. The crystals were mounted under a nitrogen atmosphere on a glass fiber at low temperature. Data collections of **1–7** were performed on a XtaLAB Synergy R, DW system, HyPix with Mo K $\alpha$  radiation ( $\lambda$  = 0.71073 Å). The CrysAlisPro package was used to determine the unit cell parameters. Empirical absorption correction was applied using spherical harmonics, implemented in SCALE3 ABSPACK scaling algorithm.<sup>8</sup> The structure was solved with the ShelXT structure solution program using Intrinsic Phasing and refined with the ShelXL refinement package using Least Squares minimization.<sup>9</sup> Hydrogen atoms were placed at calculated positions and were included in the structure calculation. Calculations were carried out using the SHELXL-2018 and Olex2 program.<sup>10,11</sup> Crystallographic data and refinement parameters are listed in Table S1. CCDC 2466216 (for **1**), 2466217 (for **2**), 2466218 (for **3a**), 2525567 (for **3b**), 2466219 (for **4**), 2466220 (for **5**), 2525568 (for **6**), and 2525569 (for **7**) contain the supplementary crystallographic data for this paper. These data are provided free of charge by the joint Cambridge Crystallographic Data Centre and Fachinformationszentrum Karlsruhe [Access Structures](#) service

**Table S1** Crystallographic data and refinement parameters.

|                                           | 0.5(1)·0.5 toluene                                                 | <b>2</b>                                                          |
|-------------------------------------------|--------------------------------------------------------------------|-------------------------------------------------------------------|
| sum formula                               | C <sub>24.5</sub> H <sub>45</sub> I <sub>2</sub> N <sub>4</sub> Yb | C <sub>29</sub> H <sub>64</sub> N <sub>4</sub> Si <sub>2</sub> Yb |
| fw                                        | 822.48                                                             | 698.06                                                            |
| color                                     | green                                                              | red                                                               |
| crystal system                            | monoclinic                                                         | orthorhombic                                                      |
| space group                               | <i>P2<sub>1</sub>/c</i>                                            | <i>Pca2<sub>1</sub></i>                                           |
| a, Å                                      | 9.0815(3)                                                          | 17.5071(3)                                                        |
| b, Å                                      | 14.3166(4)                                                         | 15.5743(2)                                                        |
| c, Å                                      | 22.1543(7)                                                         | 25.7310(3)                                                        |
| α, deg                                    | 90                                                                 | 90                                                                |
| β, deg                                    | 96.580(3)                                                          | 90                                                                |
| γ, deg                                    | 90                                                                 | 90                                                                |
| V, Å <sup>3</sup>                         | 2861.46(15)                                                        | 7015.84(17)                                                       |
| Z                                         | 2                                                                  | 8                                                                 |
| D <sub>calcd</sub> , (mg/m <sup>3</sup> ) | 1.912                                                              | 1.322                                                             |
| F(000)                                    | 1584                                                               | 2912                                                              |
| T(K)                                      | 173                                                                | 173                                                               |
| θ range, deg                              | 1.851, 25.027                                                      | 1.921, 31.139                                                     |
| no. of refns collected                    | 26943                                                              | 81582                                                             |
| no. of unique refns                       | 5052                                                               | 17791                                                             |
| no. of obsd refns (I > 2σ(I))             | 4307                                                               | 15136                                                             |
| No. of params                             | 253                                                                | 662                                                               |
| Final R, Rw (I > 2σ(I))                   | 0.0403, 0.1029                                                     | 0.0241, 0.0487                                                    |
| Goodness-of-fit on F <sup>2</sup>         | 1.038                                                              | 1.021                                                             |
| Δρ <sub>max</sub> , min, eÅ <sup>-3</sup> | 1.79, -0.95                                                        | 0.84, -0.68                                                       |

|                                              | <b>3a</b> ·hexane                                                                              | <b>3b</b> ·hexane                                                                              |
|----------------------------------------------|------------------------------------------------------------------------------------------------|------------------------------------------------------------------------------------------------|
| sum formula                                  | C <sub>90</sub> H <sub>157</sub> O <sub>4</sub> P <sub>5</sub> Si <sub>2</sub> Yb <sub>4</sub> | C <sub>82</sub> H <sub>146</sub> O <sub>5</sub> P <sub>4</sub> Si <sub>2</sub> Yb <sub>4</sub> |
| fw                                           | 2206.34                                                                                        | 2084.20                                                                                        |
| color                                        | red                                                                                            | red                                                                                            |
| crystal system                               | triclinic                                                                                      | triclinic                                                                                      |
| space group                                  | <i>P</i> $\bar{1}$                                                                             | <i>P</i> $\bar{1}$                                                                             |
| a, Å                                         | 14.8703(2)                                                                                     | 14.5523(2)                                                                                     |
| b, Å                                         | 14.9904(2)                                                                                     | 14.8785(2)                                                                                     |
| c, Å                                         | 23.0767(3)                                                                                     | 24.8265(3)                                                                                     |
| $\alpha$ , deg                               | 84.8990(10)                                                                                    | 76.6050(10)                                                                                    |
| $\beta$ , deg                                | 80.8560(10)                                                                                    | 80.0700(10)                                                                                    |
| $\gamma$ , deg                               | 79.8900(10)                                                                                    | 61.8240(10)                                                                                    |
| V, Å <sup>3</sup>                            | 4989.98(12)                                                                                    | 4596.99(11)                                                                                    |
| Z                                            | 2                                                                                              | 2                                                                                              |
| D <sub>calcd</sub> , (mg/m <sup>3</sup> )    | 1.468                                                                                          | 1.506                                                                                          |
| F(000)                                       | 2224                                                                                           | 2092                                                                                           |
| T(K)                                         | 173                                                                                            | 173                                                                                            |
| $\theta$ range, deg                          | 1.879, 25.027                                                                                  | 1.691, 25.027                                                                                  |
| no. of refns collected                       | 94104                                                                                          | 87278                                                                                          |
| no. of unique refns                          | 17614                                                                                          | 16247                                                                                          |
| no. of obsd refns ( $I > 2\sigma(I)$ )       | 15359                                                                                          | 13495                                                                                          |
| No. of params                                | 1005                                                                                           | 964                                                                                            |
| Final R, R <sub>w</sub> ( $I > 2\sigma(I)$ ) | 0.0338, 0.0815                                                                                 | 0.0394, 0.0940                                                                                 |
| Goodness-of-fit on F <sup>2</sup>            | 1.046                                                                                          | 1.029                                                                                          |
| $\Delta\rho$ max, min, eÅ <sup>-3</sup>      | 2.59, -0.97                                                                                    | 2.62, -1.86                                                                                    |

|                                                     | <b>4</b>                                                                       | <b>5·2 benzene</b>                                                              |
|-----------------------------------------------------|--------------------------------------------------------------------------------|---------------------------------------------------------------------------------|
| sum formula                                         | C <sub>92</sub> H <sub>144</sub> O <sub>5</sub> P <sub>6</sub> Yb <sub>5</sub> | C <sub>112</sub> H <sub>162</sub> N <sub>8</sub> P <sub>6</sub> Yb <sub>6</sub> |
| fw                                                  | 2381.08                                                                        | 2844.55                                                                         |
| color                                               | violet                                                                         | violet                                                                          |
| crystal system                                      | triclinic                                                                      | triclinic                                                                       |
| space group                                         | <i>P</i> $\bar{1}$                                                             | <i>P</i> $\bar{1}$                                                              |
| a, Å                                                | 12.6396(2)                                                                     | 14.5134(3)                                                                      |
| b, Å                                                | 14.9690(2)                                                                     | 15.0289(3)                                                                      |
| c, Å                                                | 25.9073(4)                                                                     | 15.4131(3)                                                                      |
| $\alpha$ , deg                                      | 92.7310(10)                                                                    | 84.471(2)                                                                       |
| $\beta$ , deg                                       | 104.0350(10)                                                                   | 64.199(2)                                                                       |
| $\gamma$ , deg                                      | 93.5450(10)                                                                    | 69.869(2)                                                                       |
| V, Å <sup>3</sup>                                   | 4736.35(12)                                                                    | 2836.17(11)                                                                     |
| Z                                                   | 2                                                                              | 1                                                                               |
| D <sub>calcd</sub> , (mg/m <sup>3</sup> )           | 1.670                                                                          | 1.665                                                                           |
| F(000)                                              | 2352                                                                           | 1400                                                                            |
| T(K)                                                | 173                                                                            | 173                                                                             |
| $\theta$ range, deg                                 | 2.020, 31.152                                                                  | 1.885, 30.975                                                                   |
| no. of refns collected                              | 108075                                                                         | 64805                                                                           |
| no. of unique refns                                 | 25301                                                                          | 14982                                                                           |
| no. of obsd refns ( $I > 2\sigma(I)$ )              | 19805                                                                          | 12046                                                                           |
| No. of params                                       | 1023                                                                           | 615                                                                             |
| Final R, R <sub>w</sub> ( $I > 2\sigma(I)$ )        | 0.0351, 0.0631                                                                 | 0.0382, 0.0961                                                                  |
| Goodness-of-fit on F <sup>2</sup>                   | 1.009                                                                          | 1.019                                                                           |
| $\Delta\rho$ <sub>max</sub> , min, eÅ <sup>-3</sup> | 1.03, -0.98                                                                    | 6.47, -1.82                                                                     |

|                                              | <b>6a</b> ·0.5 hexane                                                           | <b>4(7)</b> ·4 hexane· 9 toluene                                                   |
|----------------------------------------------|---------------------------------------------------------------------------------|------------------------------------------------------------------------------------|
| sum formula                                  | C <sub>98</sub> H <sub>150</sub> NO <sub>3</sub> P <sub>6</sub> Yb <sub>5</sub> | C <sub>543</sub> H <sub>760</sub> N <sub>24</sub> P <sub>16</sub> Yb <sub>12</sub> |
| fw                                           | 2441.20                                                                         | 10195.71                                                                           |
| color                                        | violet                                                                          | violet                                                                             |
| crystal system                               | triclinic                                                                       | triclinic                                                                          |
| space group                                  | <i>P</i> $\bar{1}$                                                              | <i>P</i> $\bar{1}$                                                                 |
| a, Å                                         | 14.3375(2)                                                                      | 20.1515(2)                                                                         |
| b, Å                                         | 15.11949(2)                                                                     | 24.7399(2)                                                                         |
| c, Å                                         | 27.4075(4)                                                                      | 28.4472(4)                                                                         |
| $\alpha$ , deg                               | 77.8500(10)                                                                     | 92.5630(10)                                                                        |
| $\beta$ , deg                                | 81.6100(10)                                                                     | 92.9270(10)                                                                        |
| $\gamma$ , deg                               | 73.4890(10)                                                                     | 109.6680(10)                                                                       |
| V, Å <sup>3</sup>                            | 5545.12(14)                                                                     | 13306.8(2)                                                                         |
| Z                                            | 2                                                                               | 1                                                                                  |
| D <sub>calcd</sub> , (mg/m <sup>3</sup> )    | 1.462                                                                           | 1.272                                                                              |
| F(000)                                       | 2418                                                                            | 5266                                                                               |
| T(K)                                         | 173                                                                             | 150                                                                                |
| $\theta$ range, deg                          | 1.767, 30.933                                                                   | 1.733, 25.000                                                                      |
| no. of refns collected                       | 125160                                                                          | 251905                                                                             |
| no. of unique refns                          | 28852                                                                           | 46819                                                                              |
| no. of obsd refns ( $I > 2\sigma(I)$ )       | 21082                                                                           | 38580                                                                              |
| No. of params                                | 1051                                                                            | 3636                                                                               |
| Final R, R <sub>w</sub> ( $I > 2\sigma(I)$ ) | 0.0332, 0.0663                                                                  | 0.0392, 0.0955                                                                     |
| Goodness-of-fit on F <sup>2</sup>            | 1.030                                                                           | 1.101                                                                              |
| $\Delta\rho$ max, min, eÅ <sup>-3</sup>      | 0.90, -0.85                                                                     | 1.65, -0.80                                                                        |

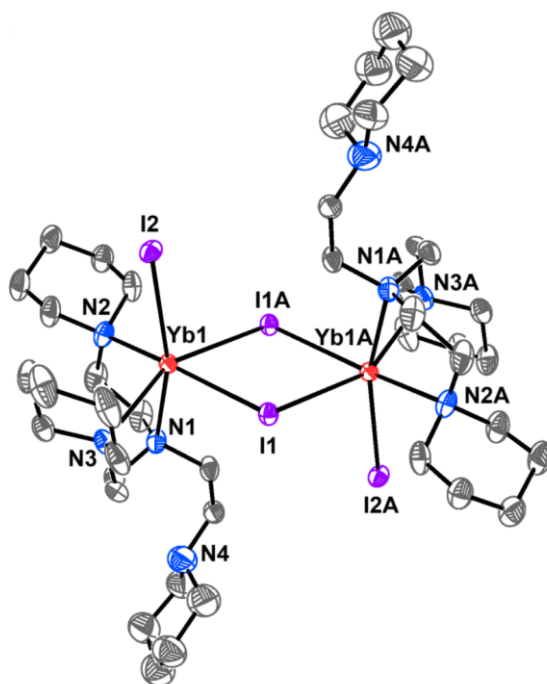

**Fig. S1** Molecular structure of complex **1** with ellipsoids at 30% probability level. Hydrogen atoms were omitted for clarity. Selected bond distances [Å] and angles [°]: Yb1–N1 2.544(6), Yb–N2 2.618(7), Yb–N3 2.658(7), Yb–I1 3.1491(6), Yb–I1A 3.2109(6), Yb–I2 3.0712(6), Yb1–I–Yb1(A) 100.048, I1–Yb–I1(A) 79.952.

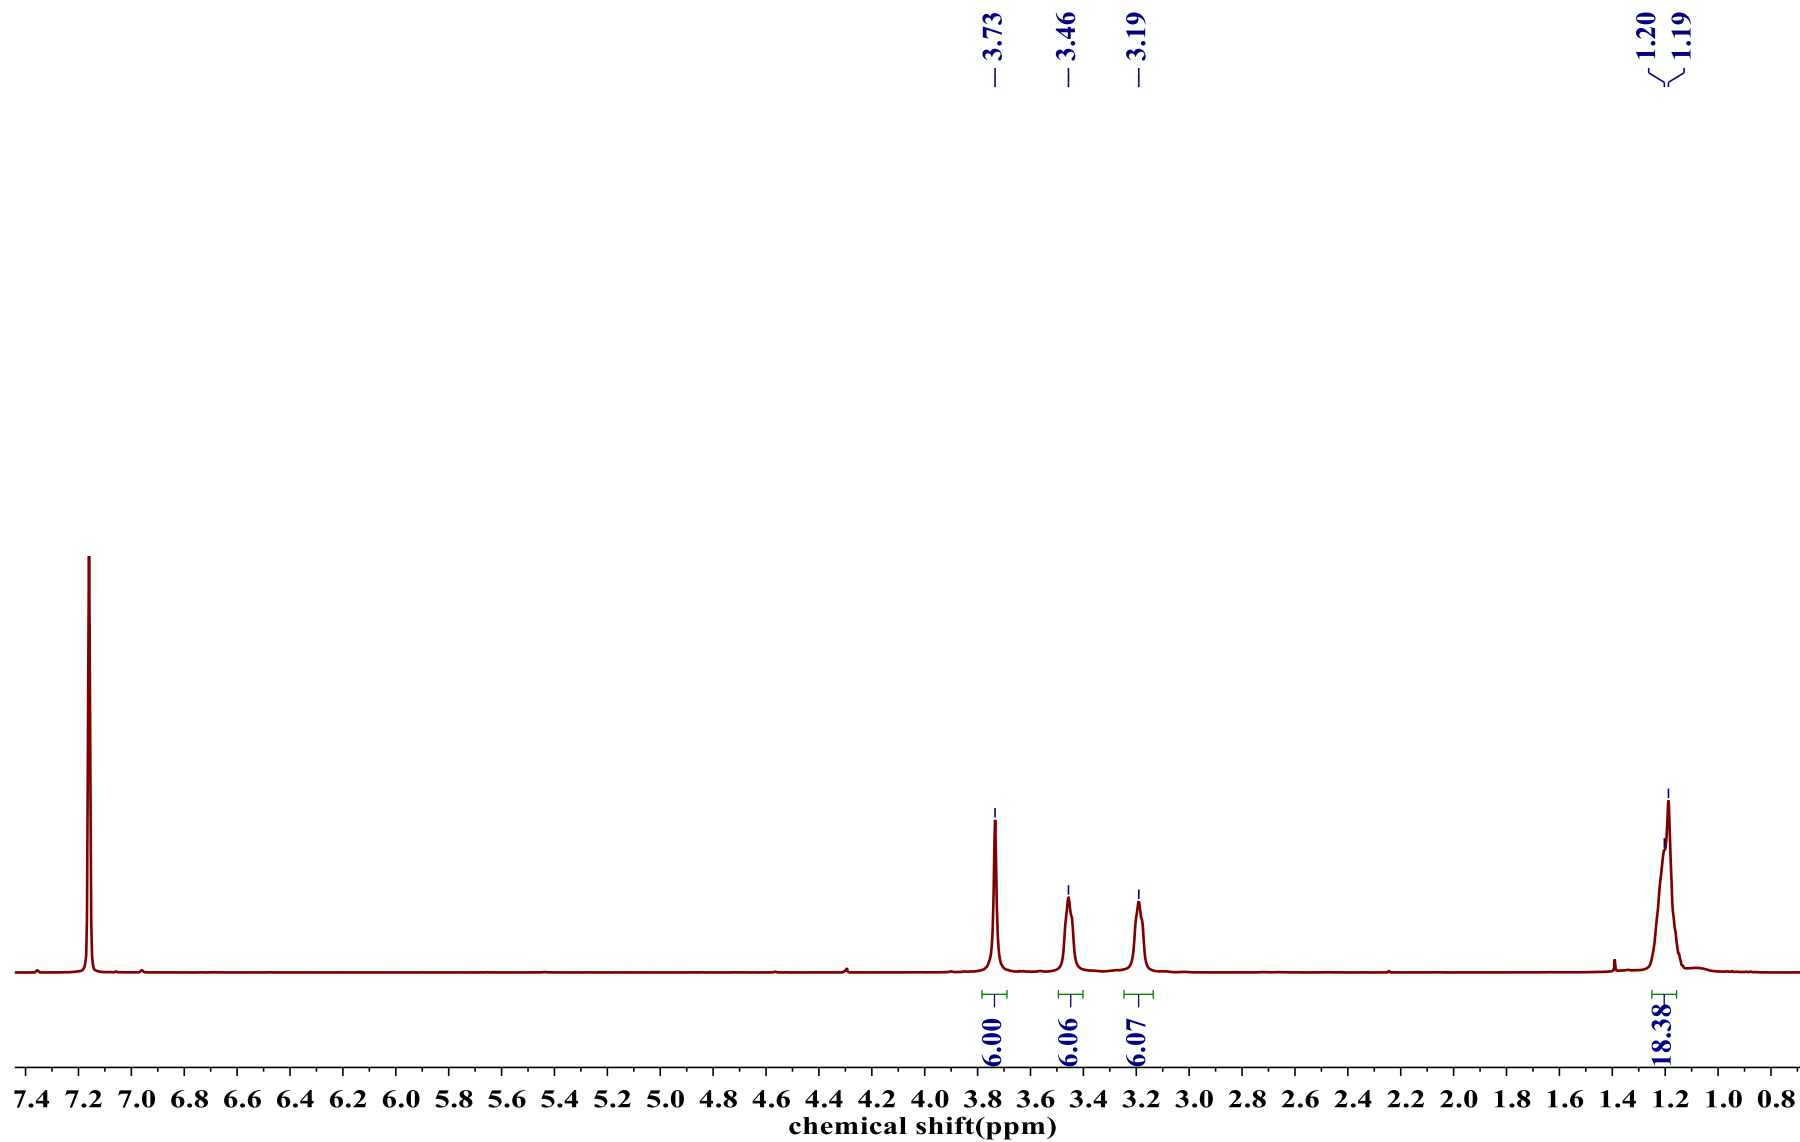

**Fig. S2**  $^1\text{H}$  NMR spectrum of 2,2,2-nitrilotrisacetyl piperidine (400 MHz,  $\text{C}_6\text{D}_6$ , 25  $^\circ\text{C}$ ).

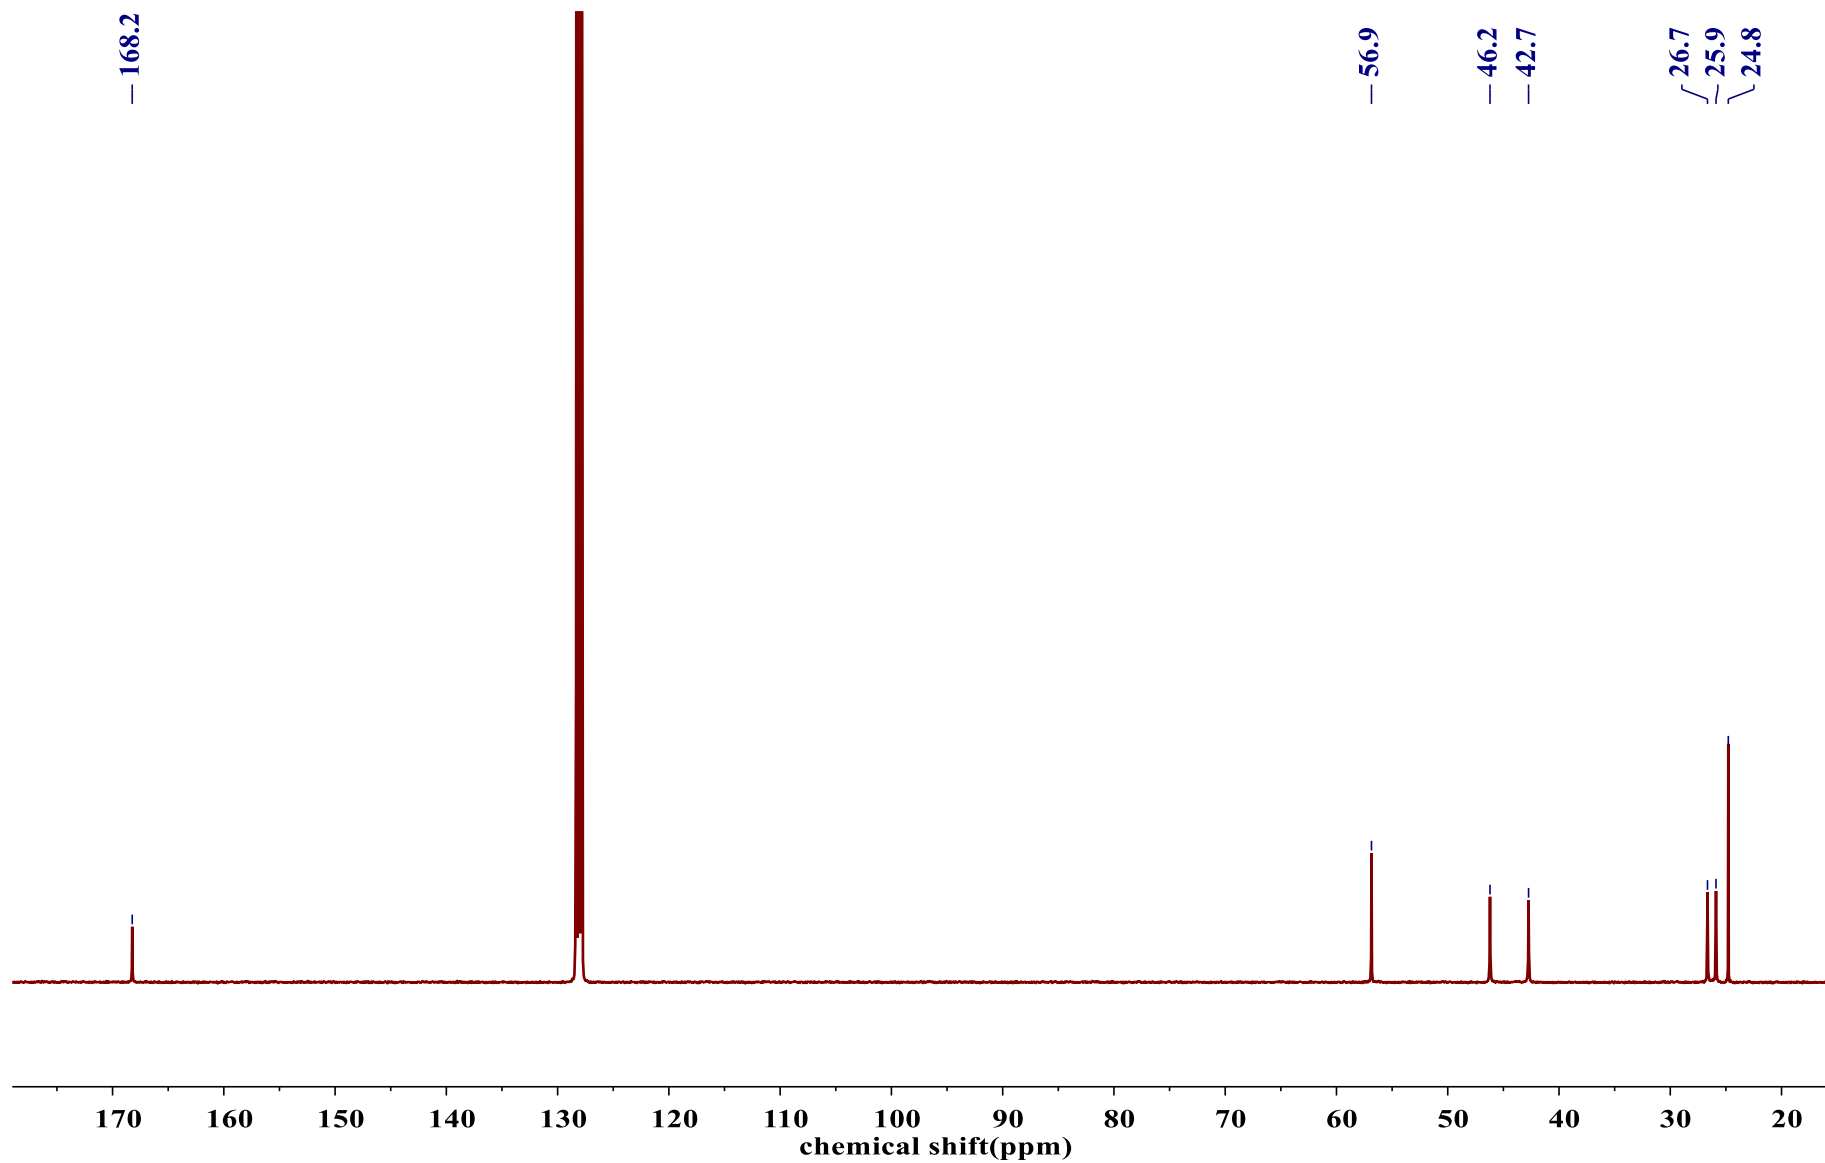

**Fig. S3**  $^{13}\text{C}\{^1\text{H}\}$  NMR spectrum of 2,2,2-nitrotrisacetyl piperidine (100 MHz,  $\text{C}_6\text{D}_6$ , 25 °C).

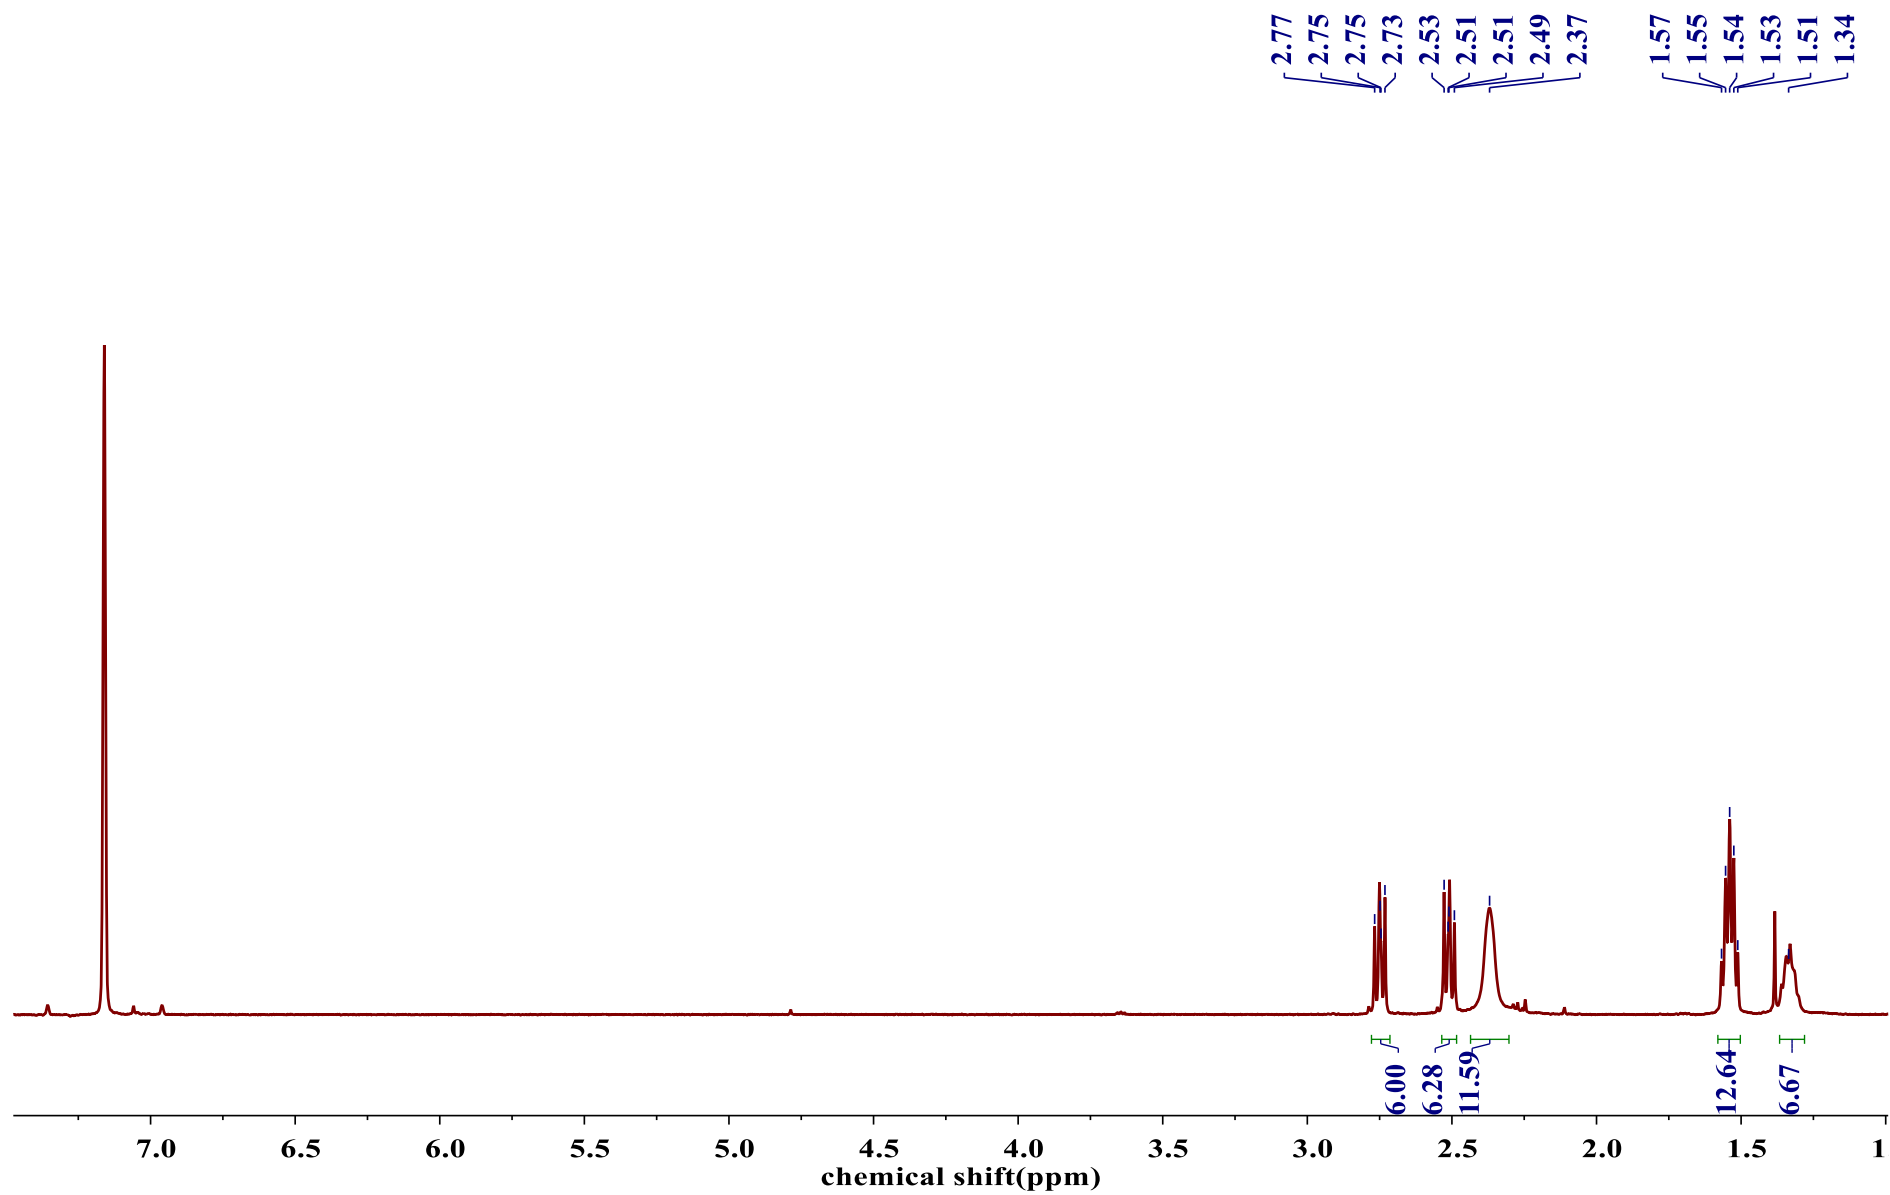

**Fig. S4**  $^1\text{H}$  NMR spectrum of  $(\text{Pip})_3\text{tren}$  (400 MHz,  $\text{C}_6\text{D}_6$ , 25  $^\circ\text{C}$ ).

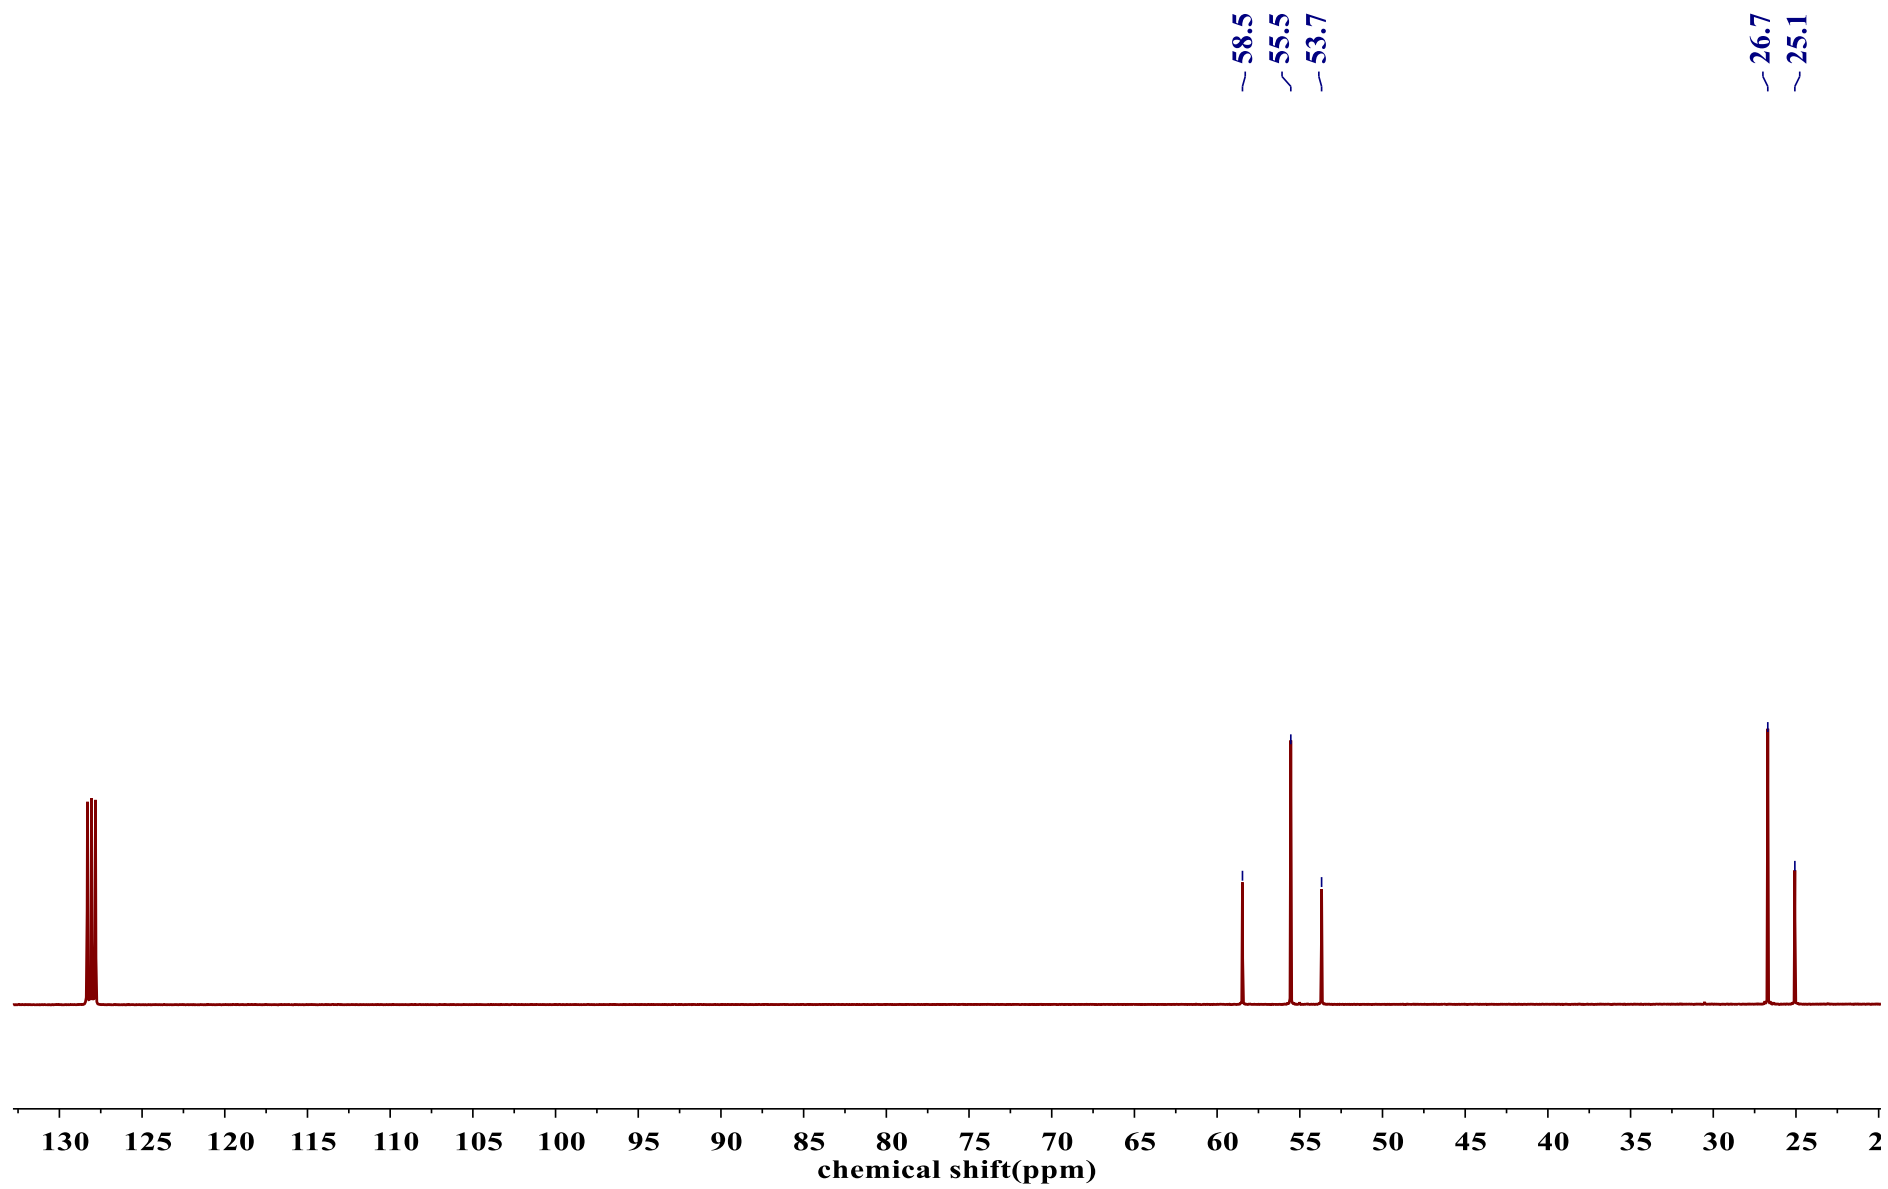

**Fig. S5**  $^{13}\text{C}\{^1\text{H}\}$  NMR spectrum of  $(\text{Pip})_3\text{tren}$  (100 MHz,  $\text{C}_6\text{D}_6$ ,  $25\text{ }^\circ\text{C}$ ).

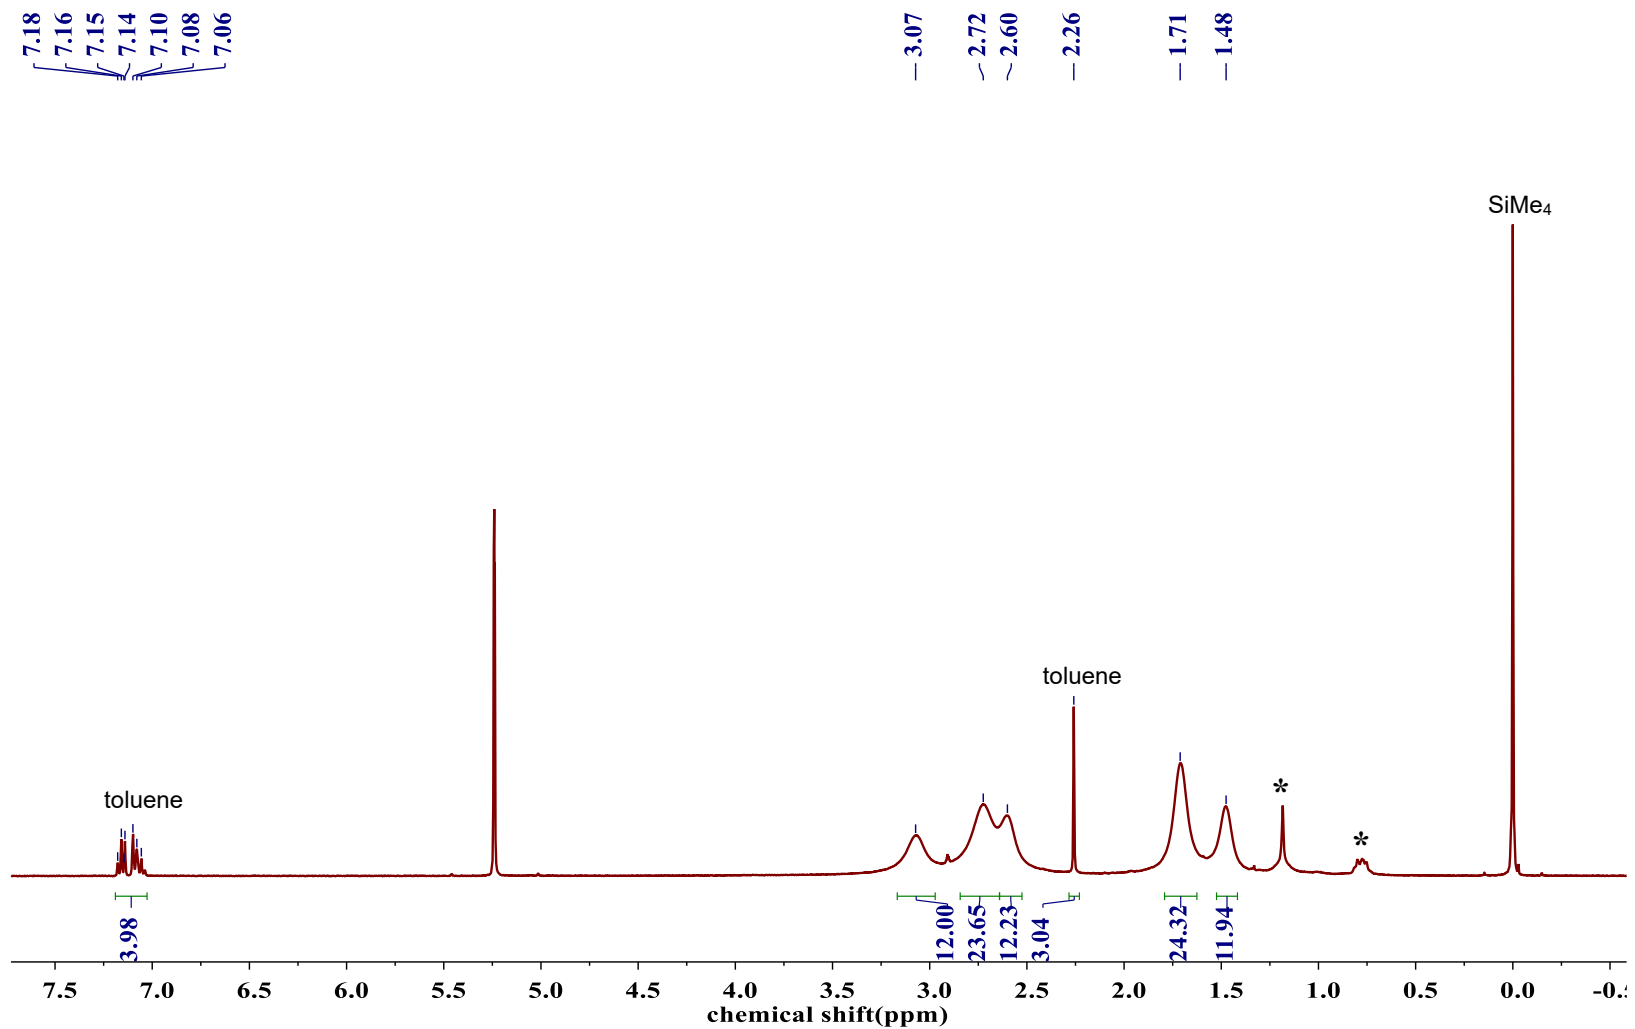

**Fig. S6** <sup>1</sup>H NMR spectrum of complex **1** · toluene with SiMe<sub>4</sub> as the internal standard (400 MHz, CD<sub>2</sub>Cl<sub>2</sub>, 25 °C). Asterisks denote the residue *n*-hexane.

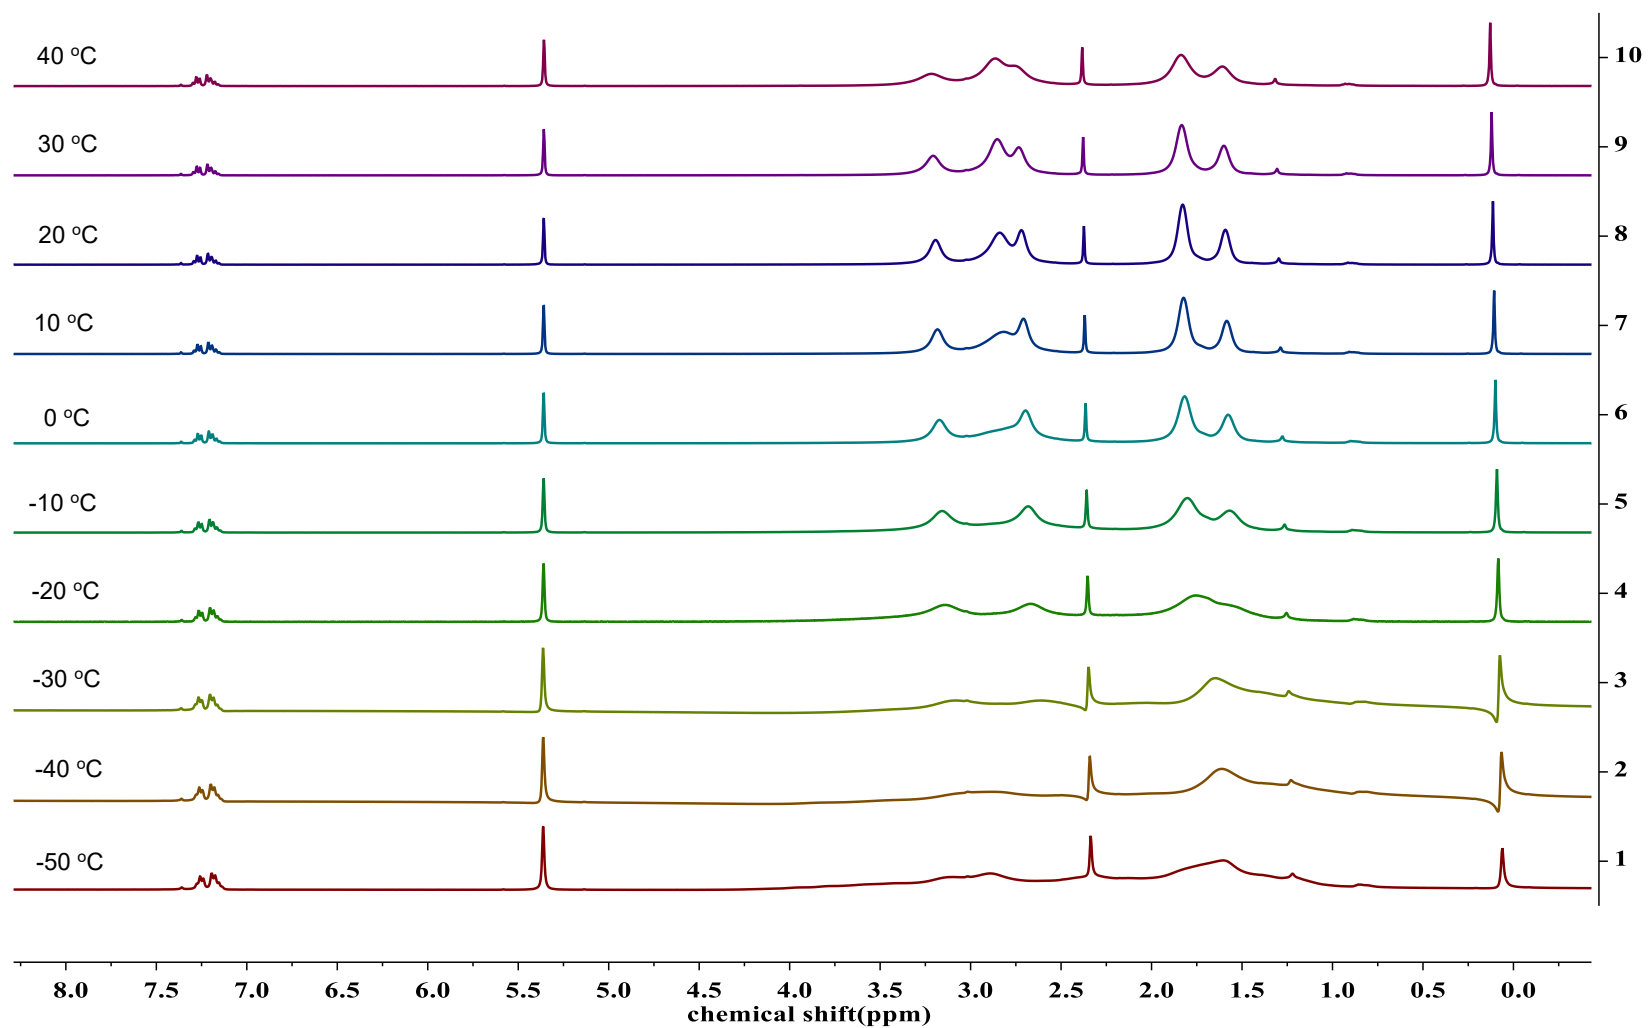

**Fig. S7** Variant temperature <sup>1</sup>H NMR spectrum of complex **1** · toluene with SiMe<sub>4</sub> as the internal standard (400 MHz, CD<sub>2</sub>Cl<sub>2</sub>, -50, -40, -30, -20, -10, 0, 10, 20, 30 and 40 °C).

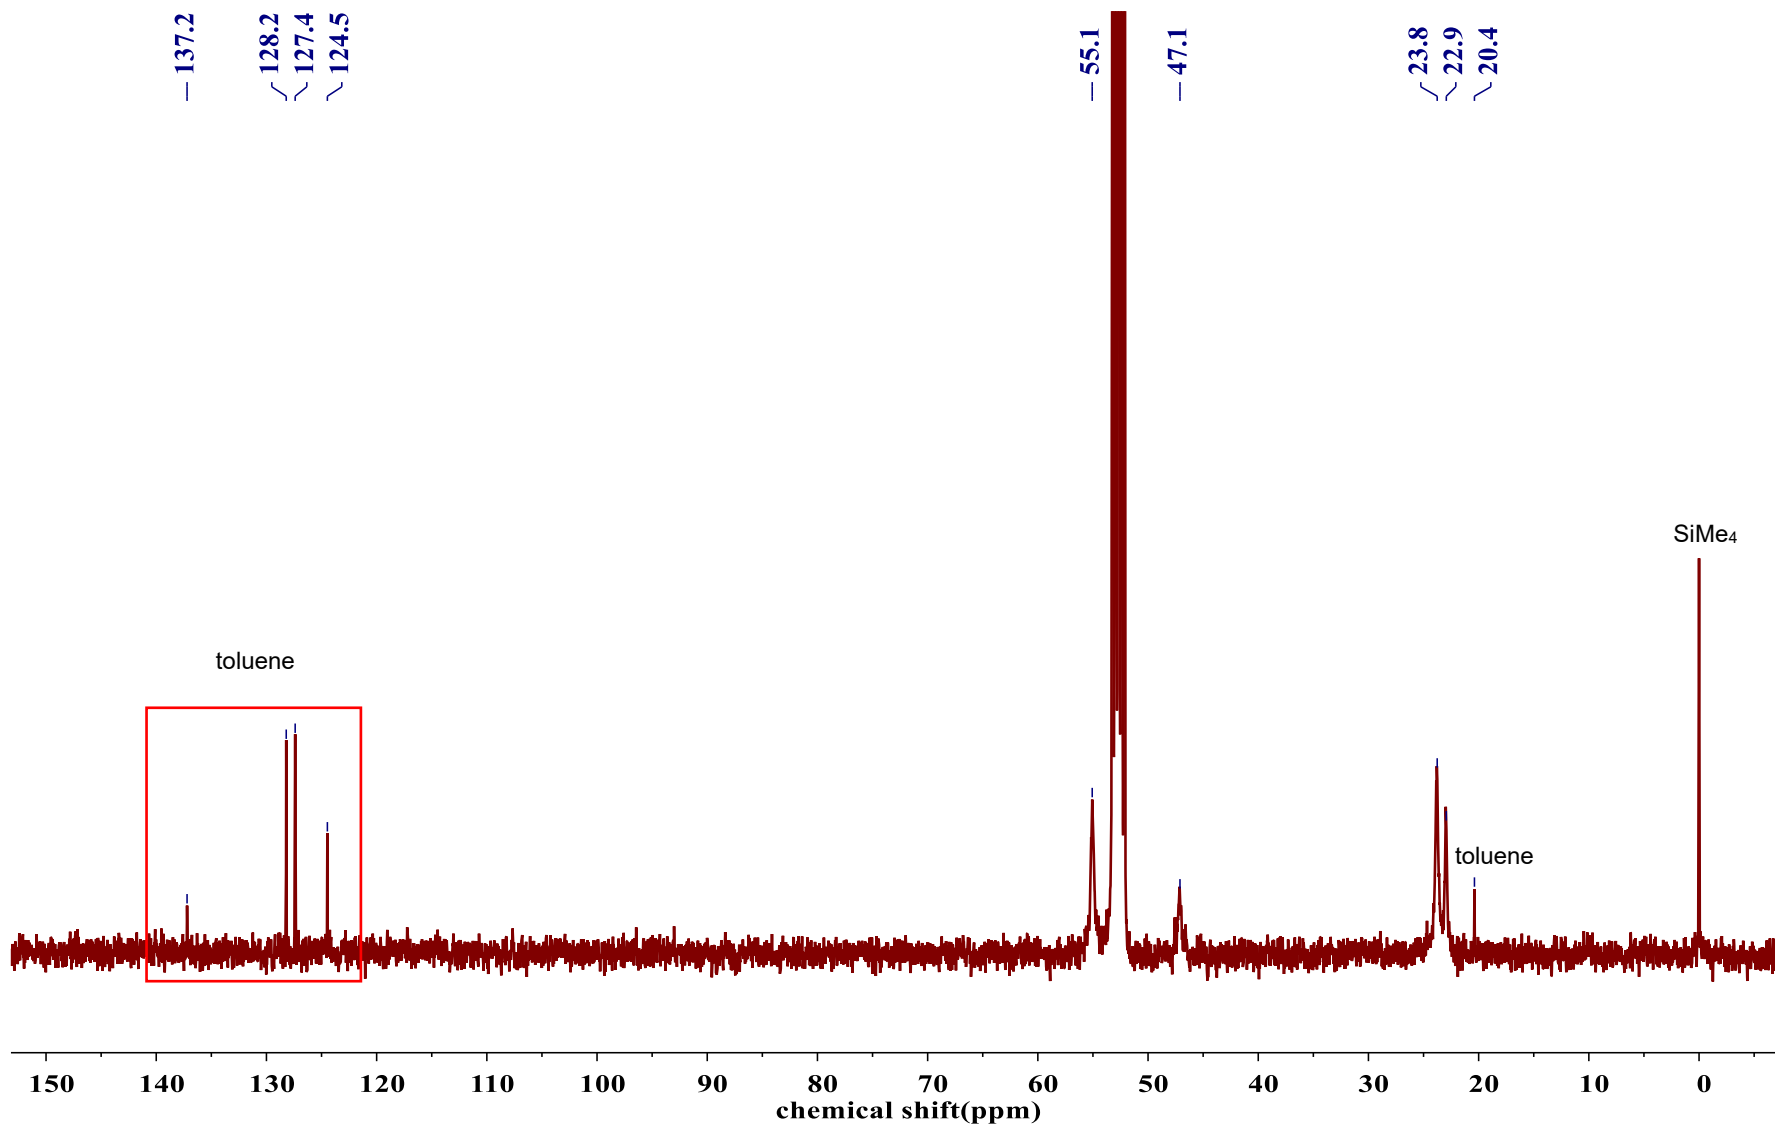

**Fig. S8**  $^{13}\text{C}\{^1\text{H}\}$  NMR spectrum of complex 1 with SiMe<sub>4</sub> as the internal standard (100 MHz, CD<sub>2</sub>Cl<sub>2</sub>, 25 °C).

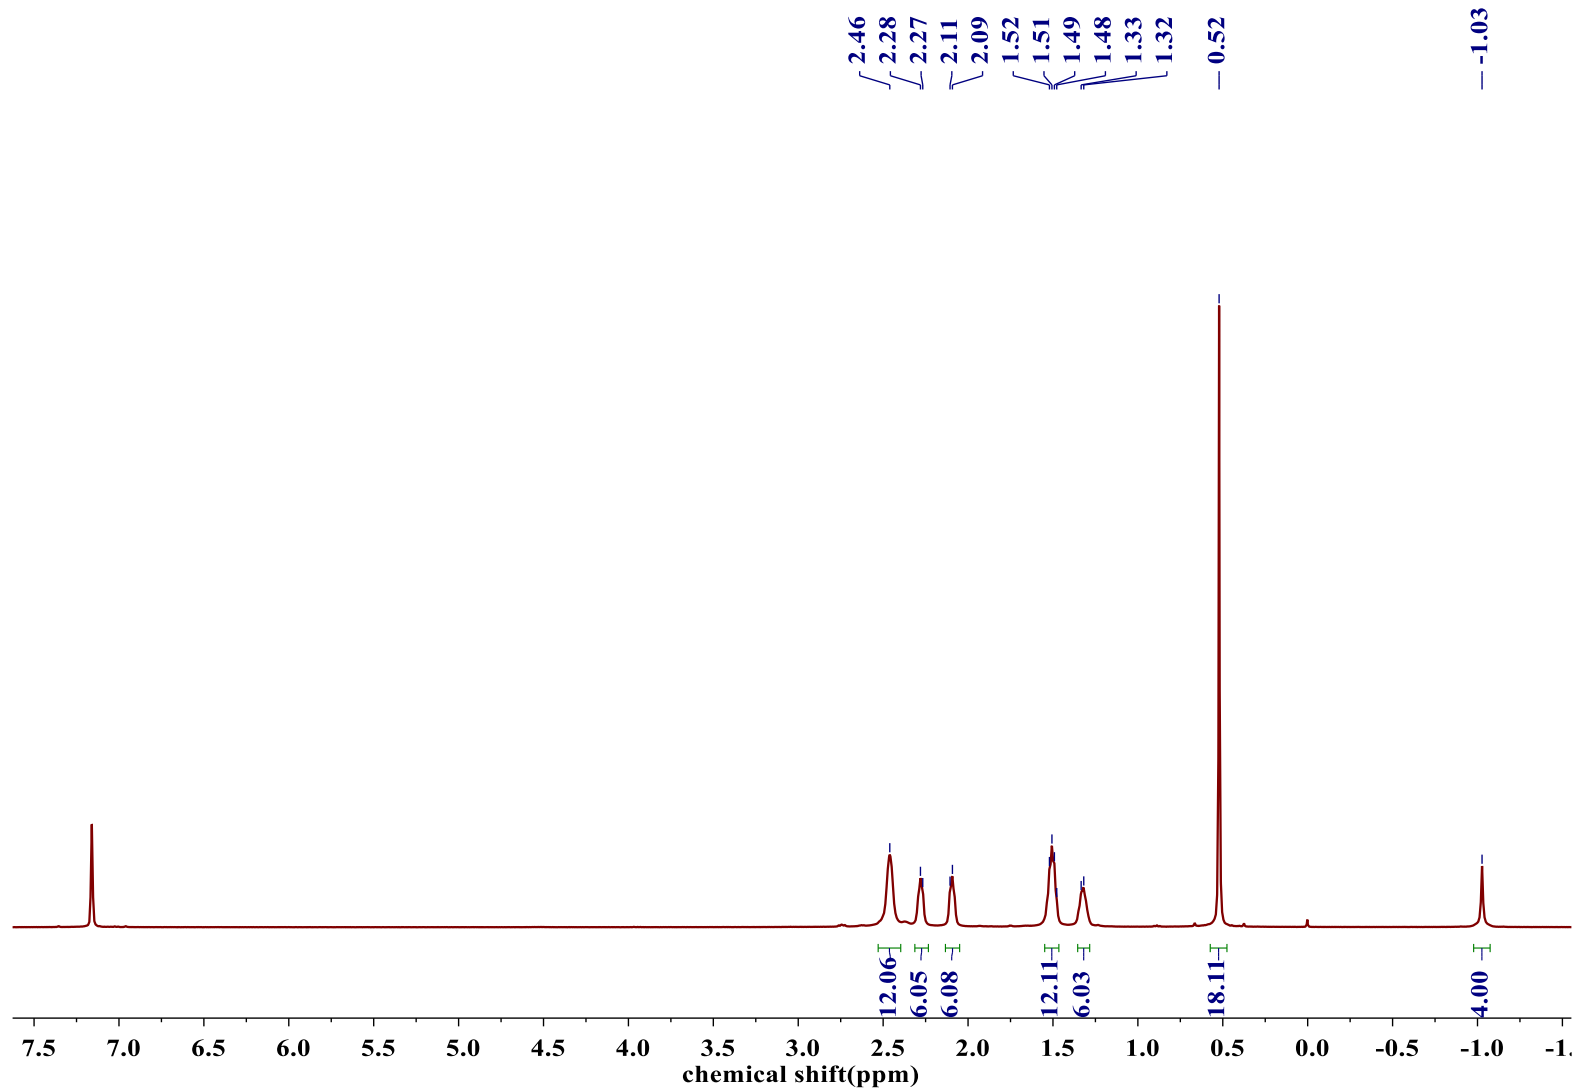

**Fig. S9**  $^1\text{H}$  NMR spectrum of complex **2** (400 MHz,  $\text{C}_6\text{D}_6$ , 25  $^\circ\text{C}$ ).

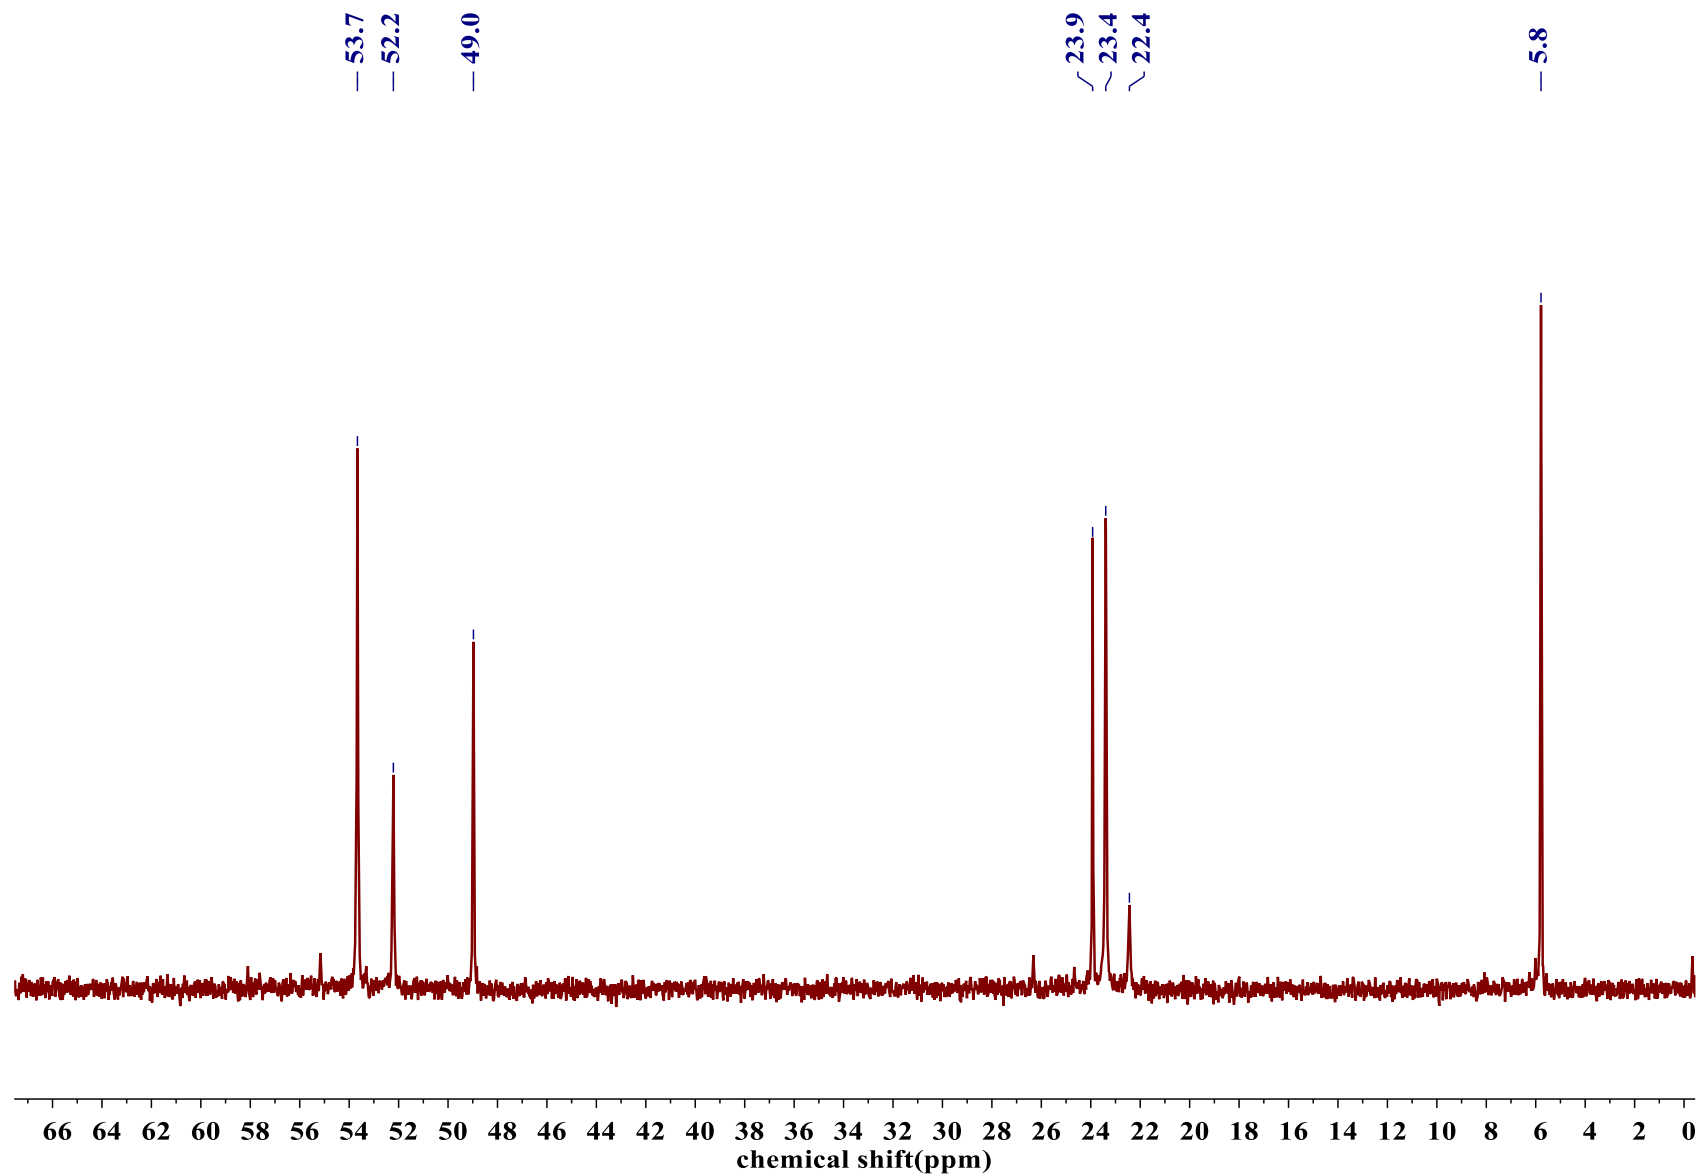

**Fig. S10**  $^{13}\text{C}\{^1\text{H}\}$  NMR spectrum of complex **2** (100 MHz,  $\text{C}_6\text{D}_6$ , 25 °C).

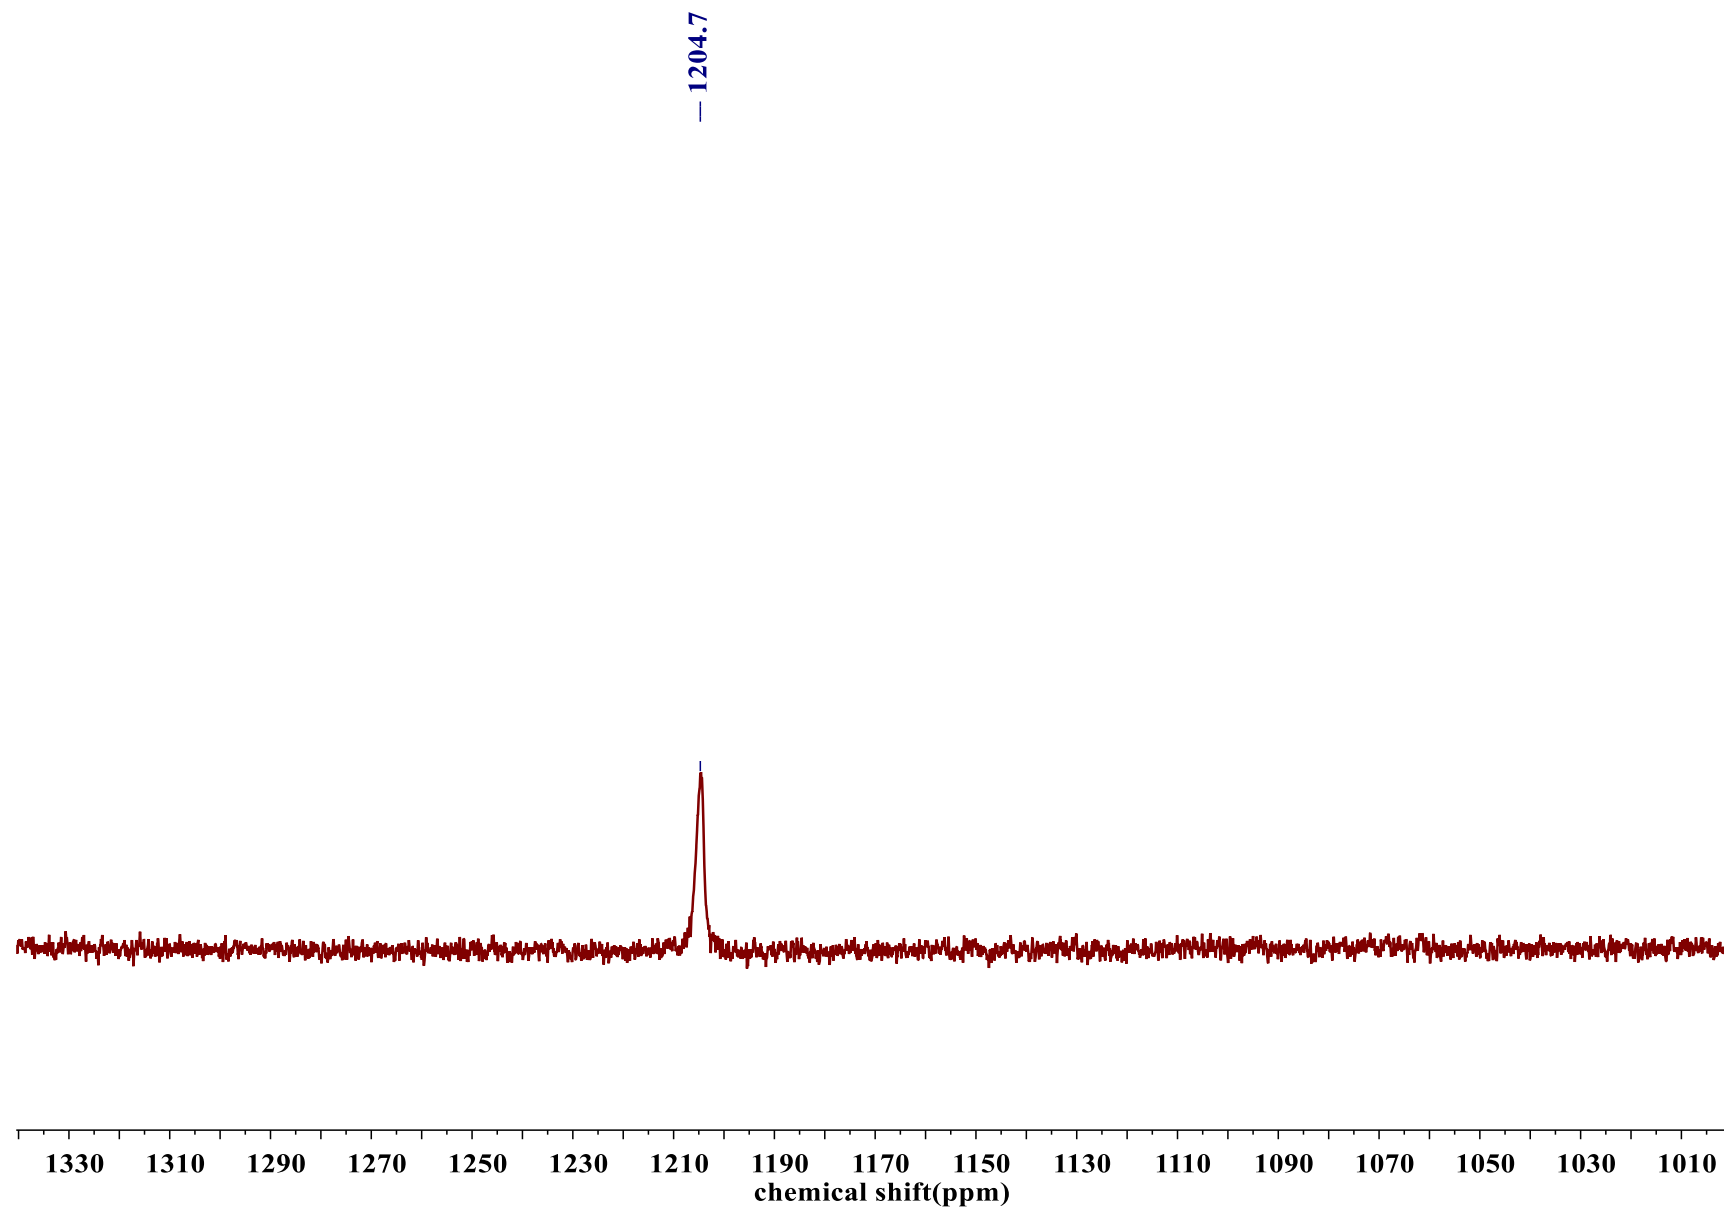

**Fig. S11**  $^{171}\text{Yb}\{^1\text{H}\}$  NMR spectrum of complex **2** (71 MHz,  $\text{C}_6\text{D}_6$ , 25 °C).

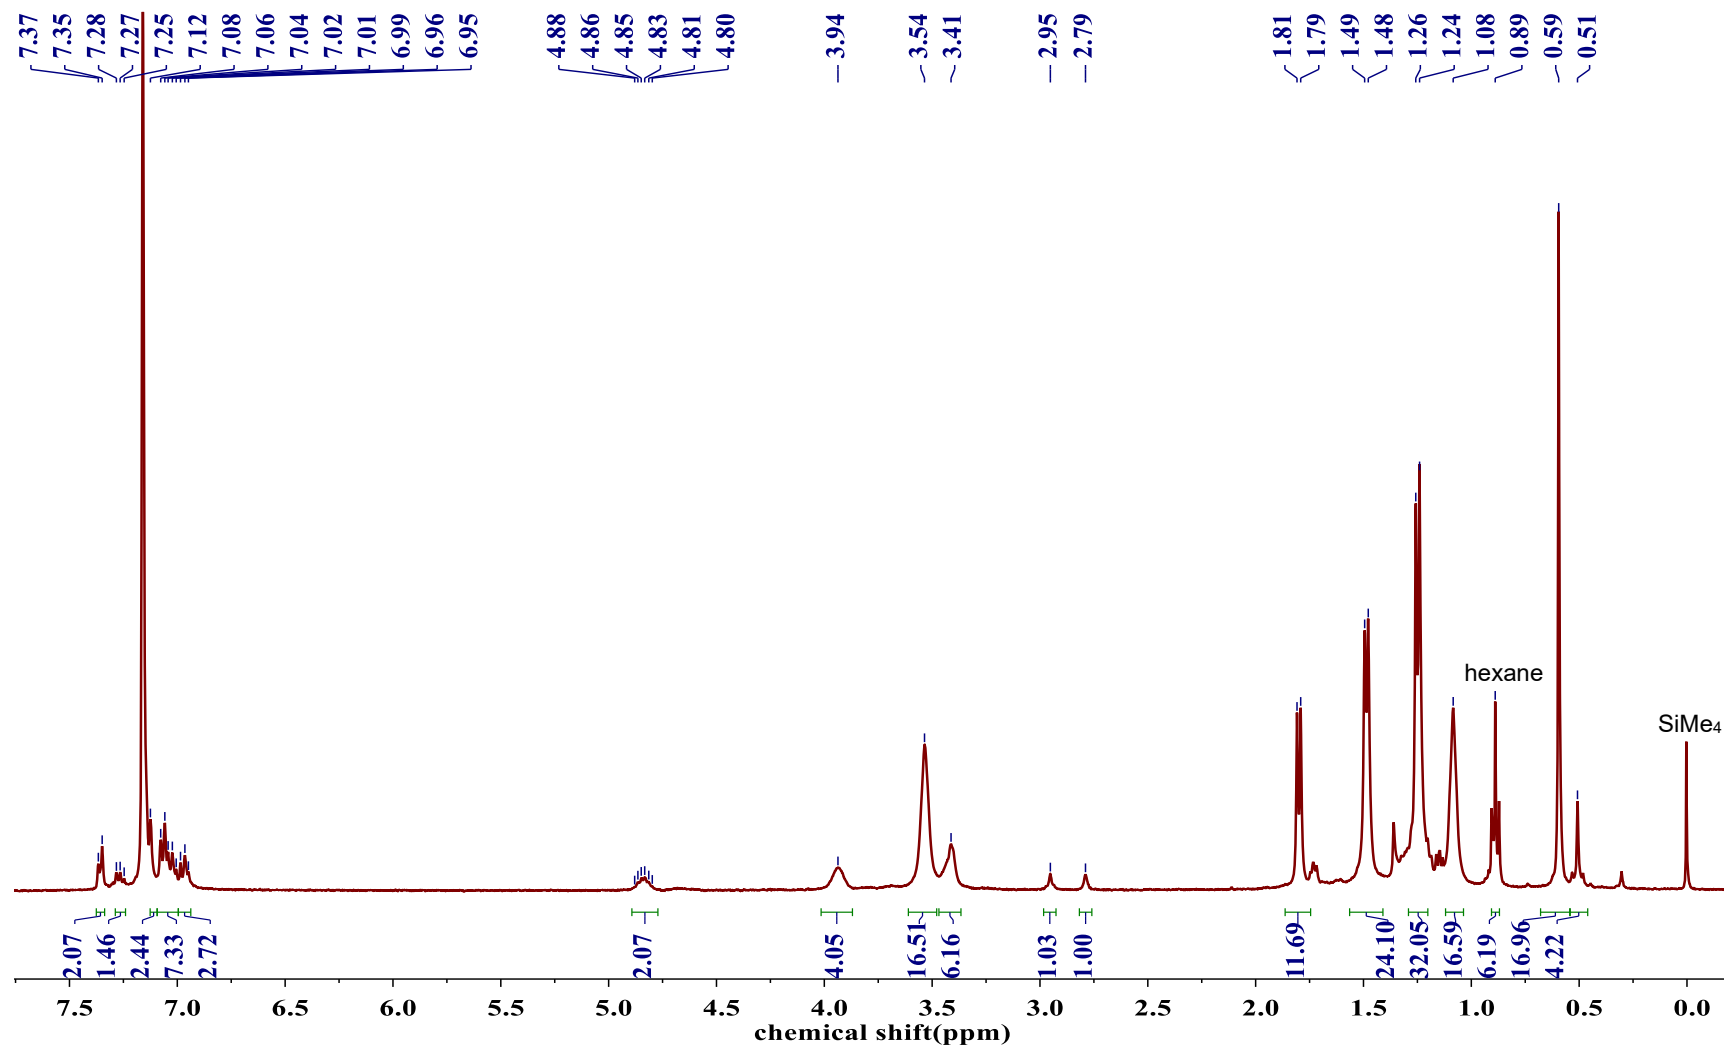

**Fig. S12** <sup>1</sup>H NMR spectrum of complex **3a** · hexane (400 MHz, C<sub>6</sub>D<sub>6</sub>, 25 °C). (A small amount of complex **3** have decomposed, SiMe<sub>4</sub> is one of the decomposition products)

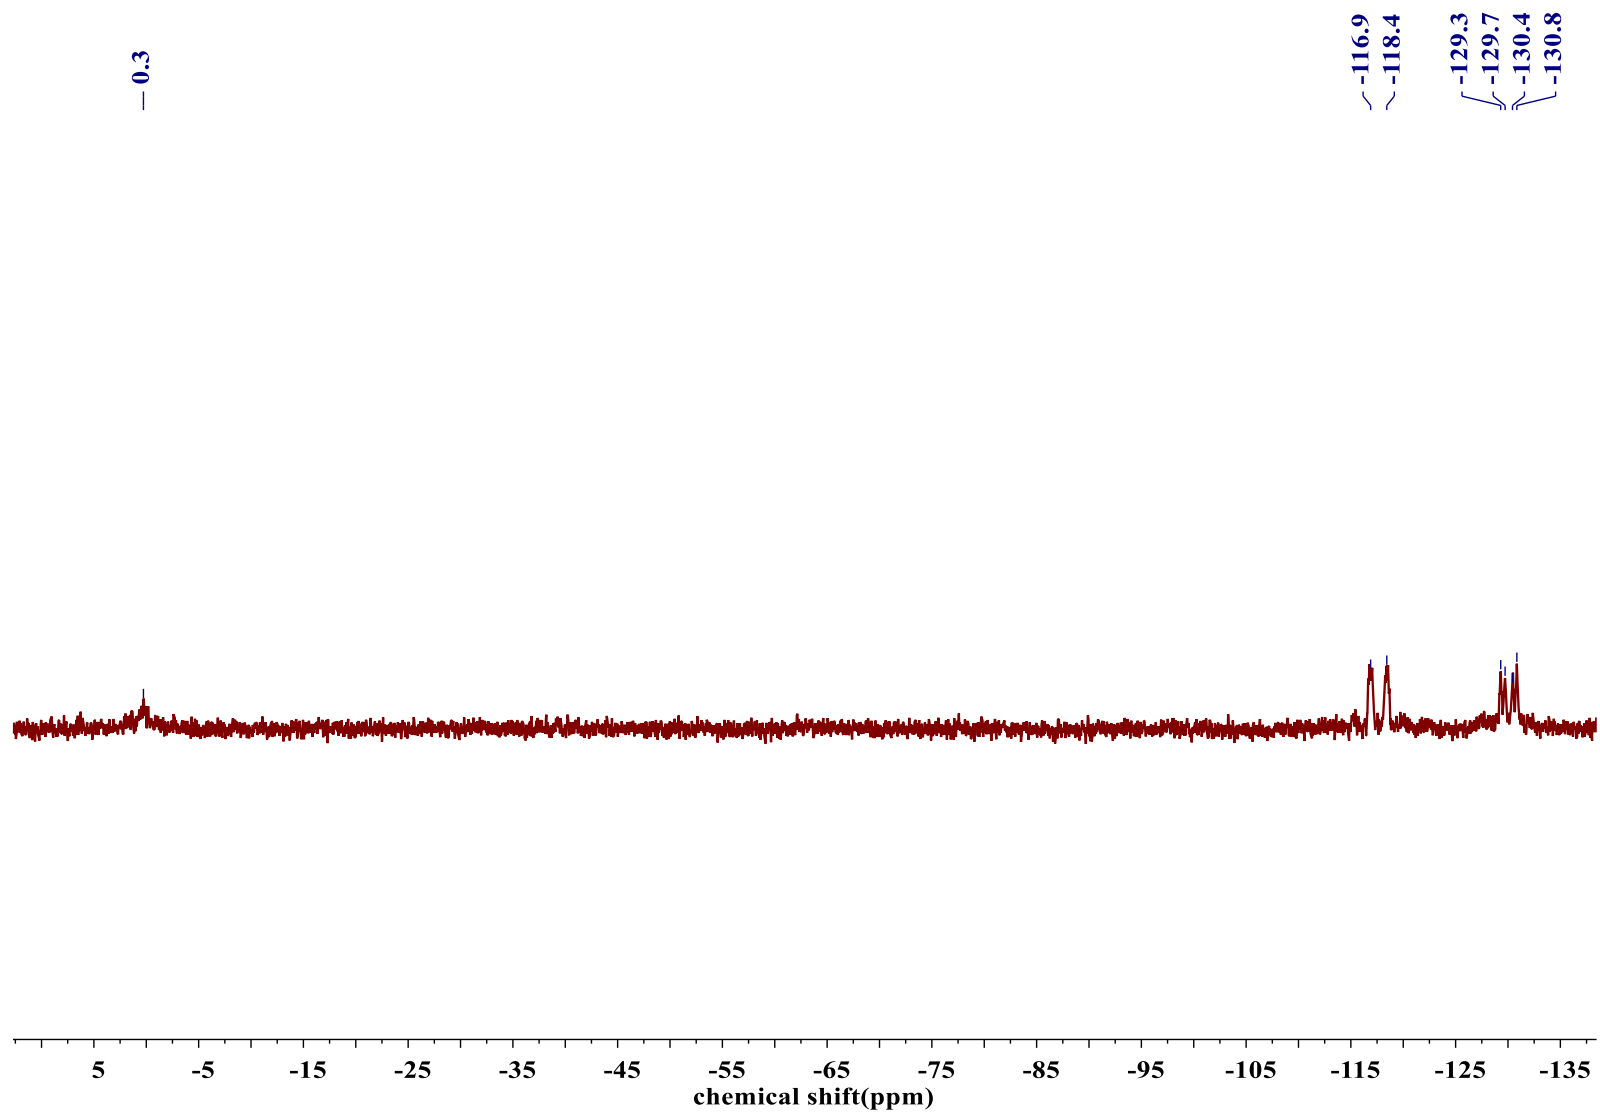

**Fig. S13**  $^{31}\text{P}$  NMR spectrum of complex 3a (162 MHz,  $\text{C}_6\text{D}_6$ , 25 °C)

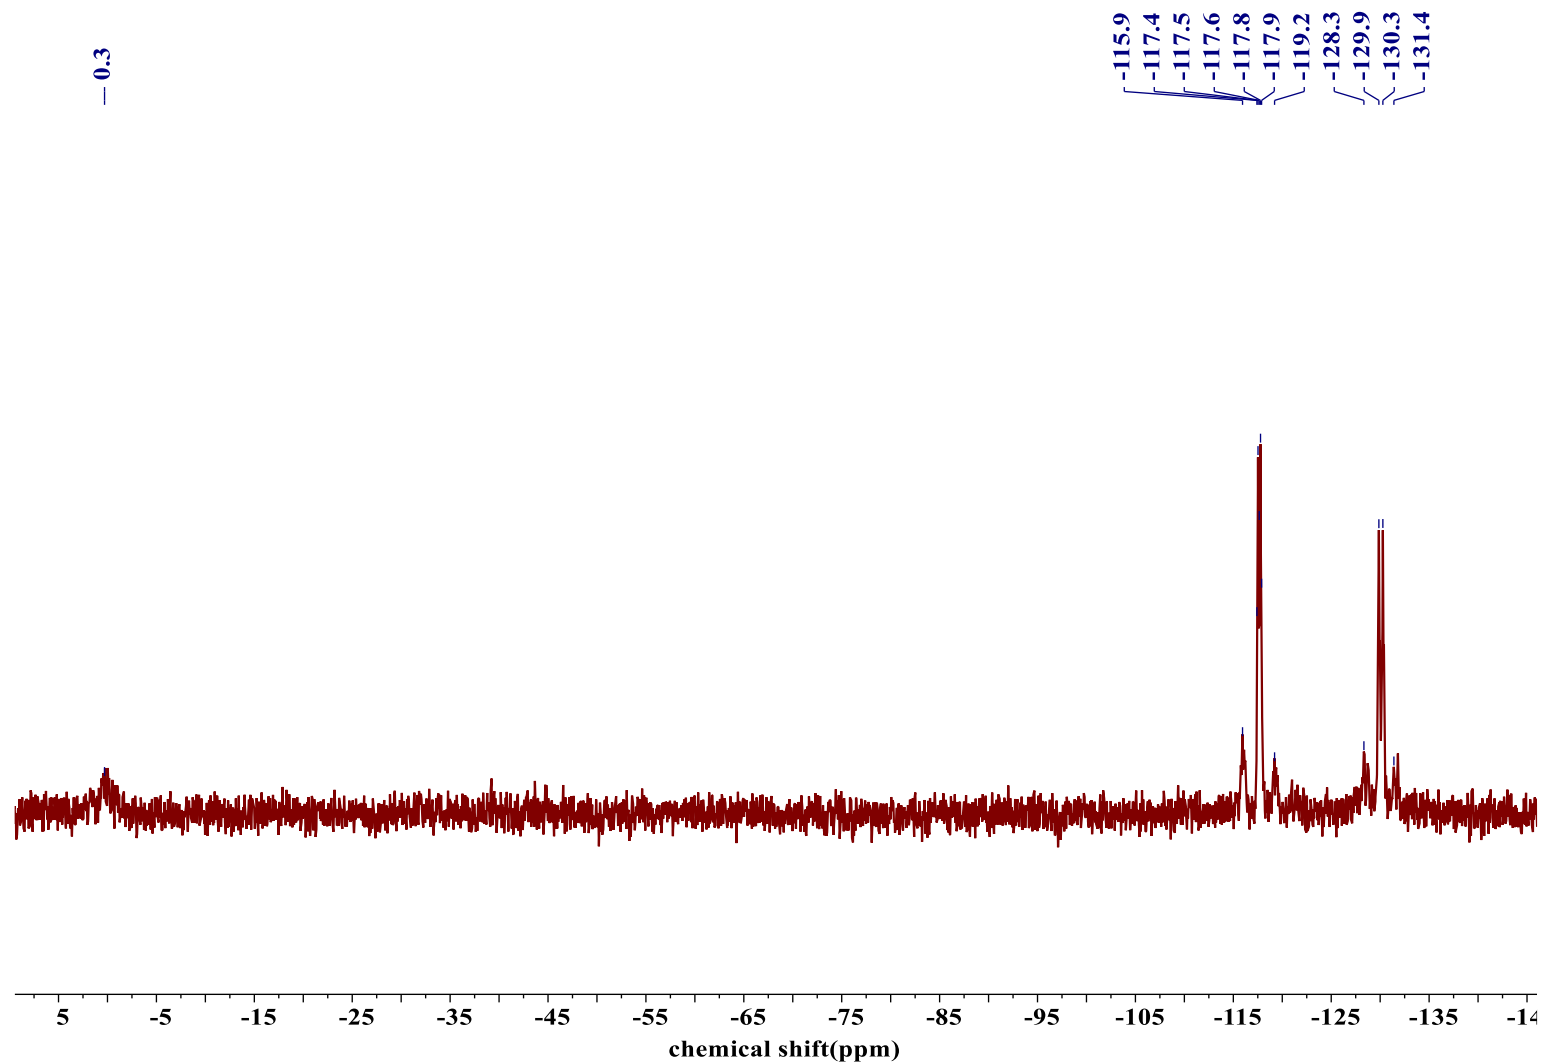

**Fig. S14**  $^{31}\text{P}\{^1\text{H}\}$  NMR spectrum of complex **3a** (162 MHz,  $\text{C}_6\text{D}_6$ , 25 °C)

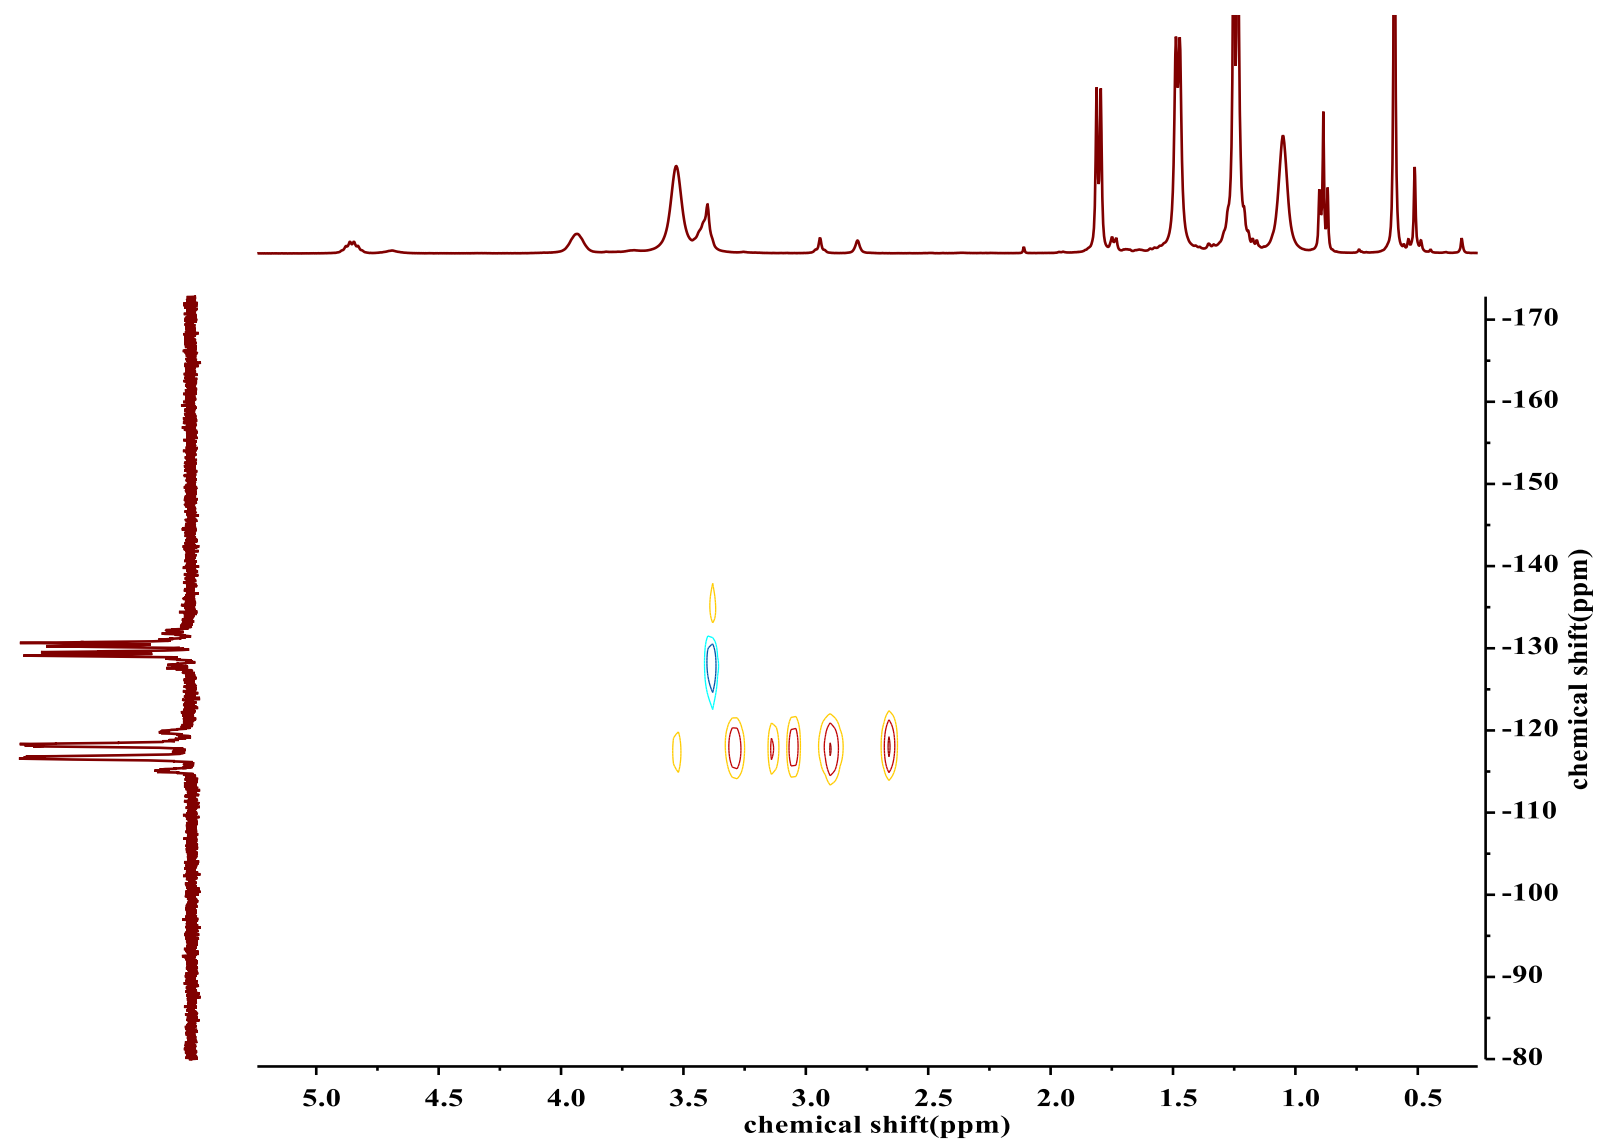

**Fig. S15**  $^1\text{H}/^{31}\text{P}$  HSQC NMR spectra of complex **3a** (400/162 MHz,  $\text{C}_6\text{D}_6$ , 25  $^\circ\text{C}$ ).

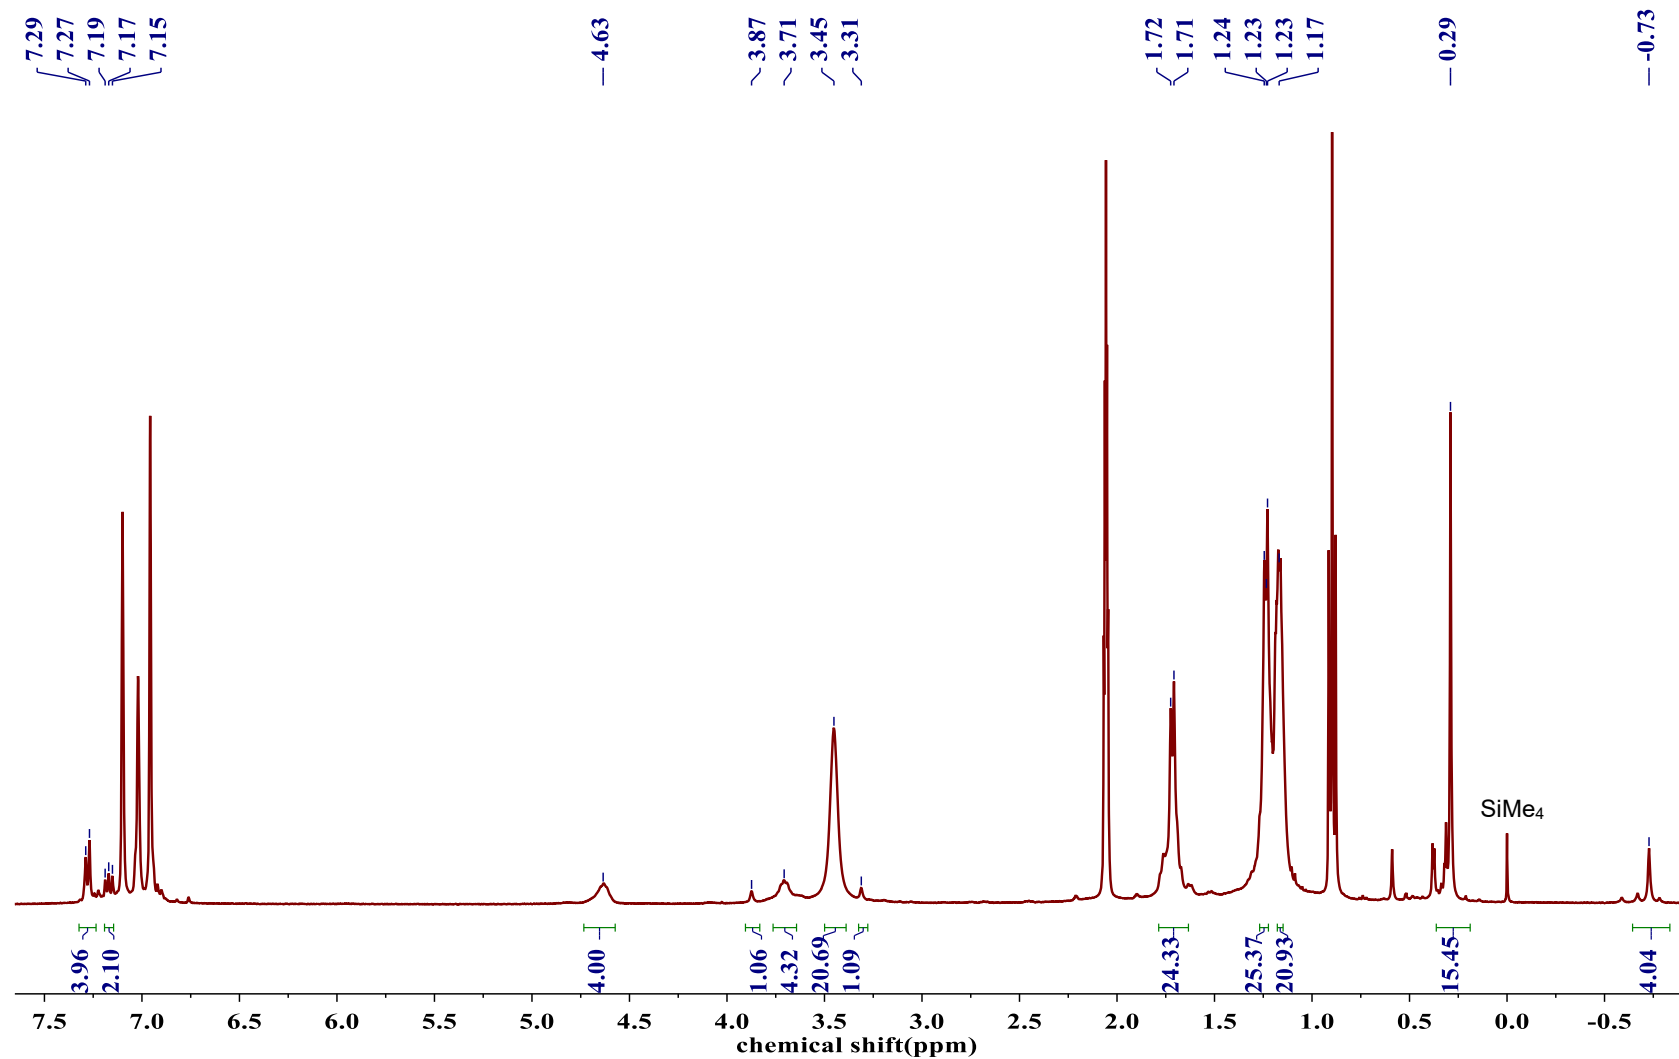

**Fig. S16** <sup>1</sup>H NMR spectrum of complex **3b** (400 MHz, *d*<sub>8</sub>-toluene, -30 °C). (A small amount of complex **3b** have decomposed, SiMe<sub>4</sub> is one of the decomposition products)

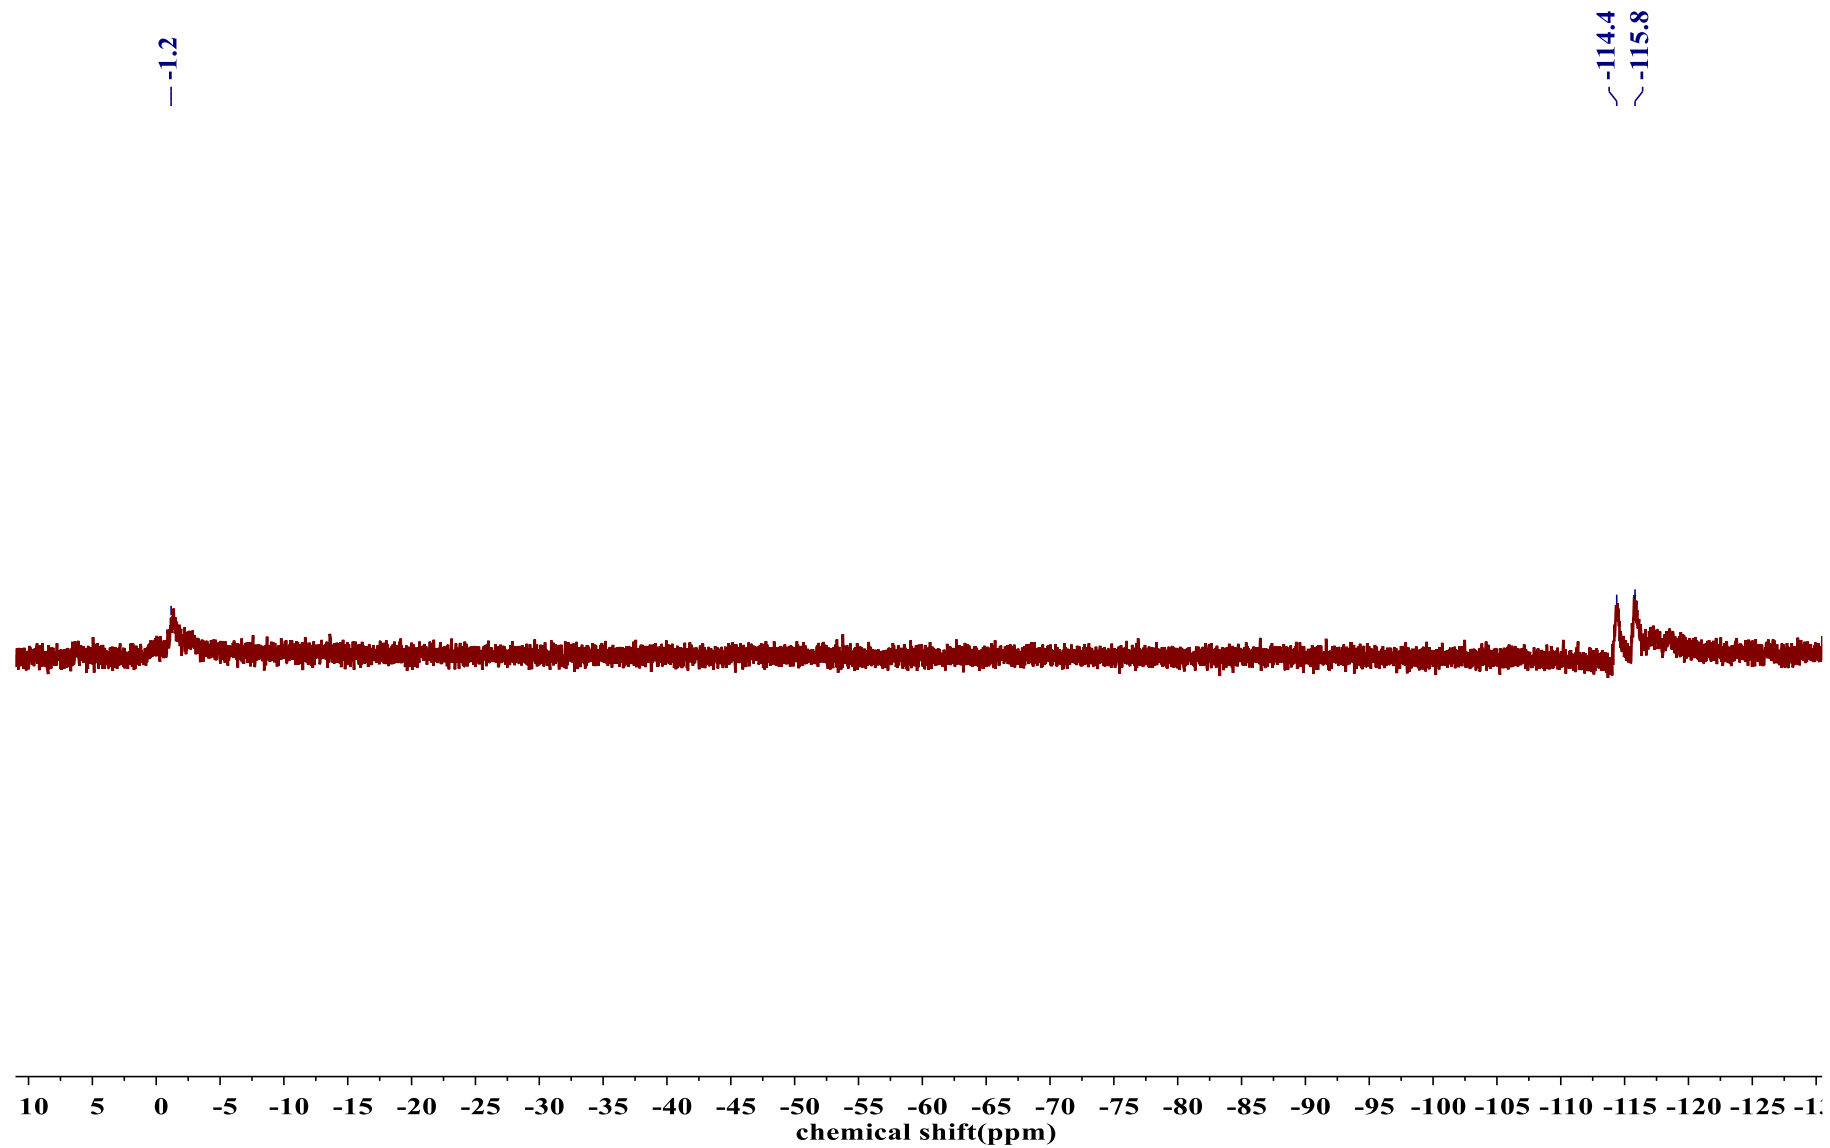

**Fig. S17**  $^{31}\text{P}$  NMR spectrum of complex **3b** (162 MHz,  $d_8$ -toluene, -30 °C)

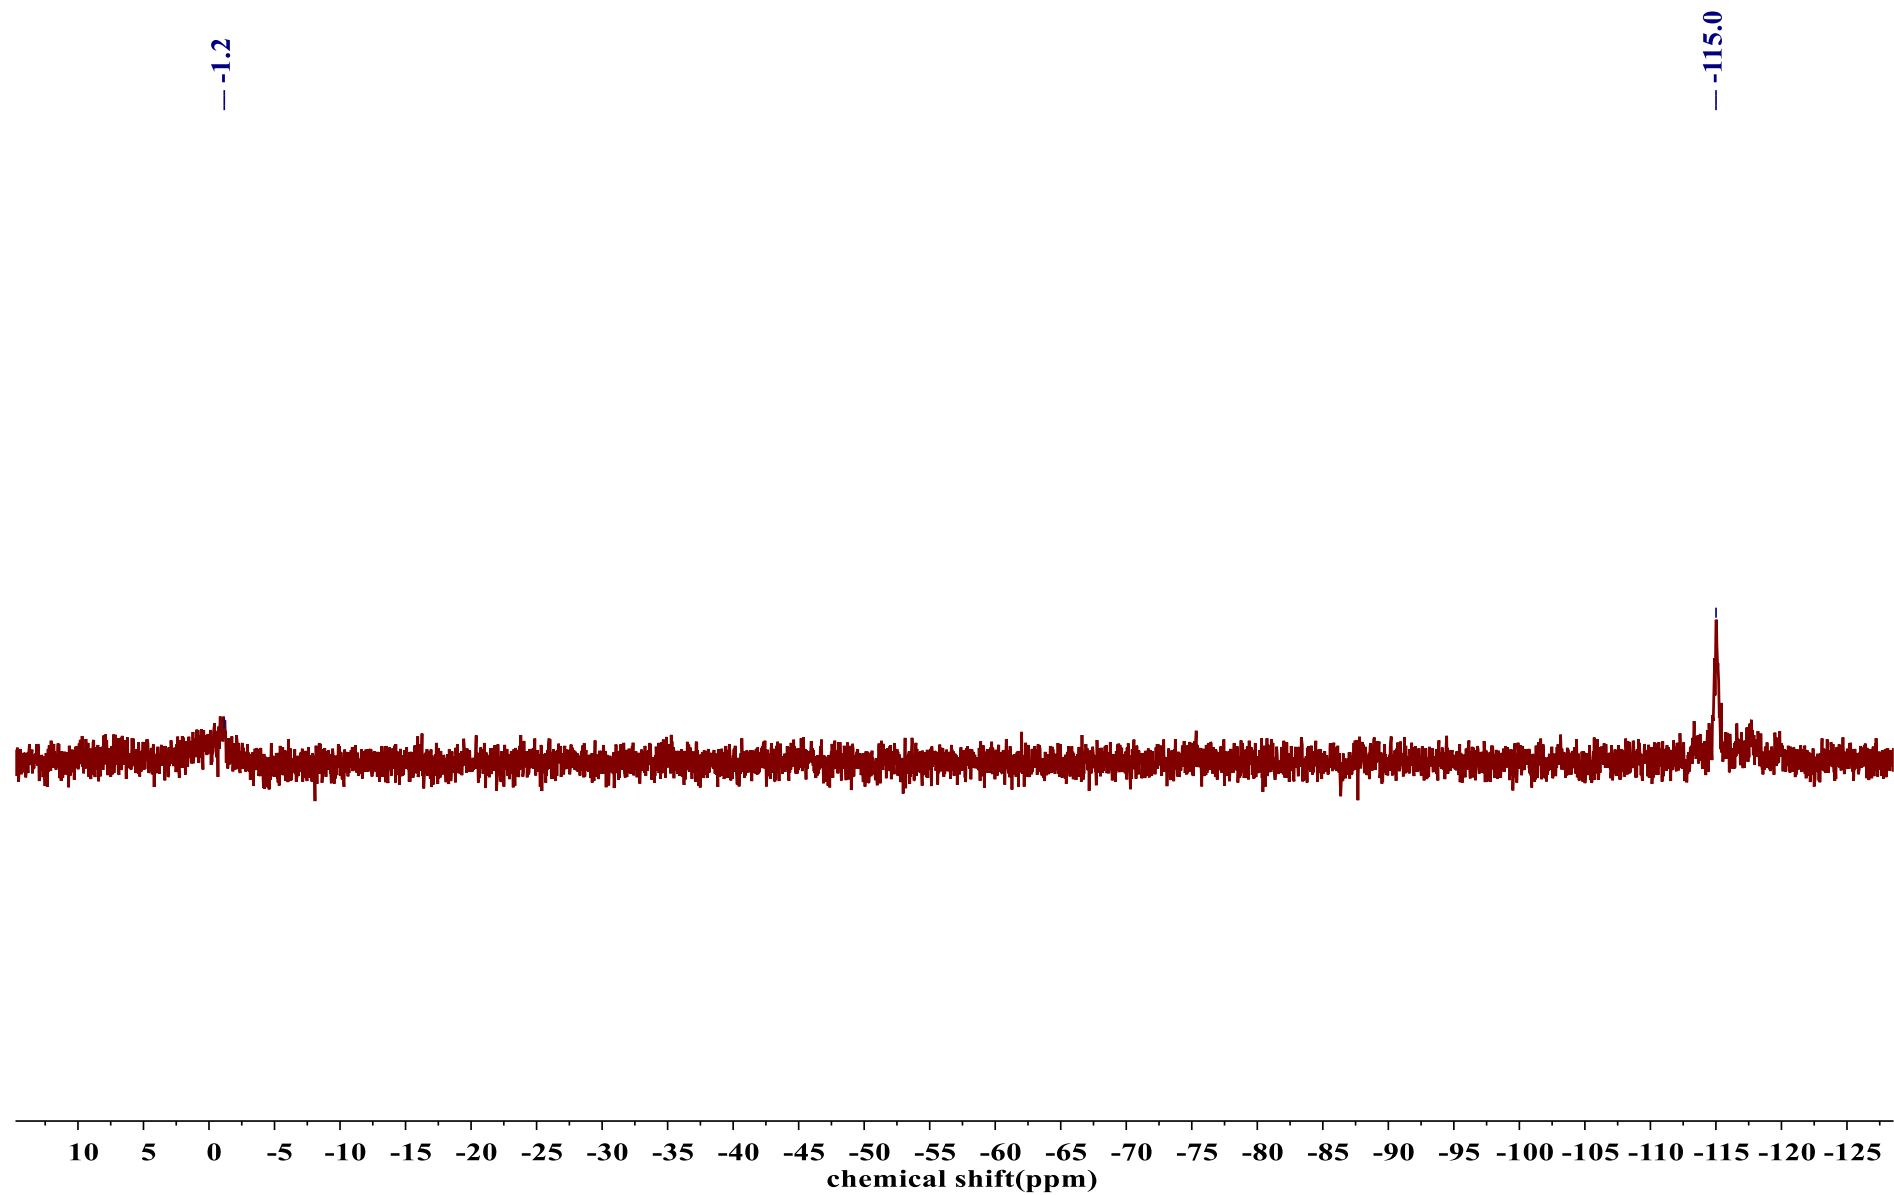

**Fig. S18**  $^{31}\text{P}\{^1\text{H}\}$  NMR spectrum of complex **3b** (162 MHz,  $d_8$ -toluene, -30 °C)

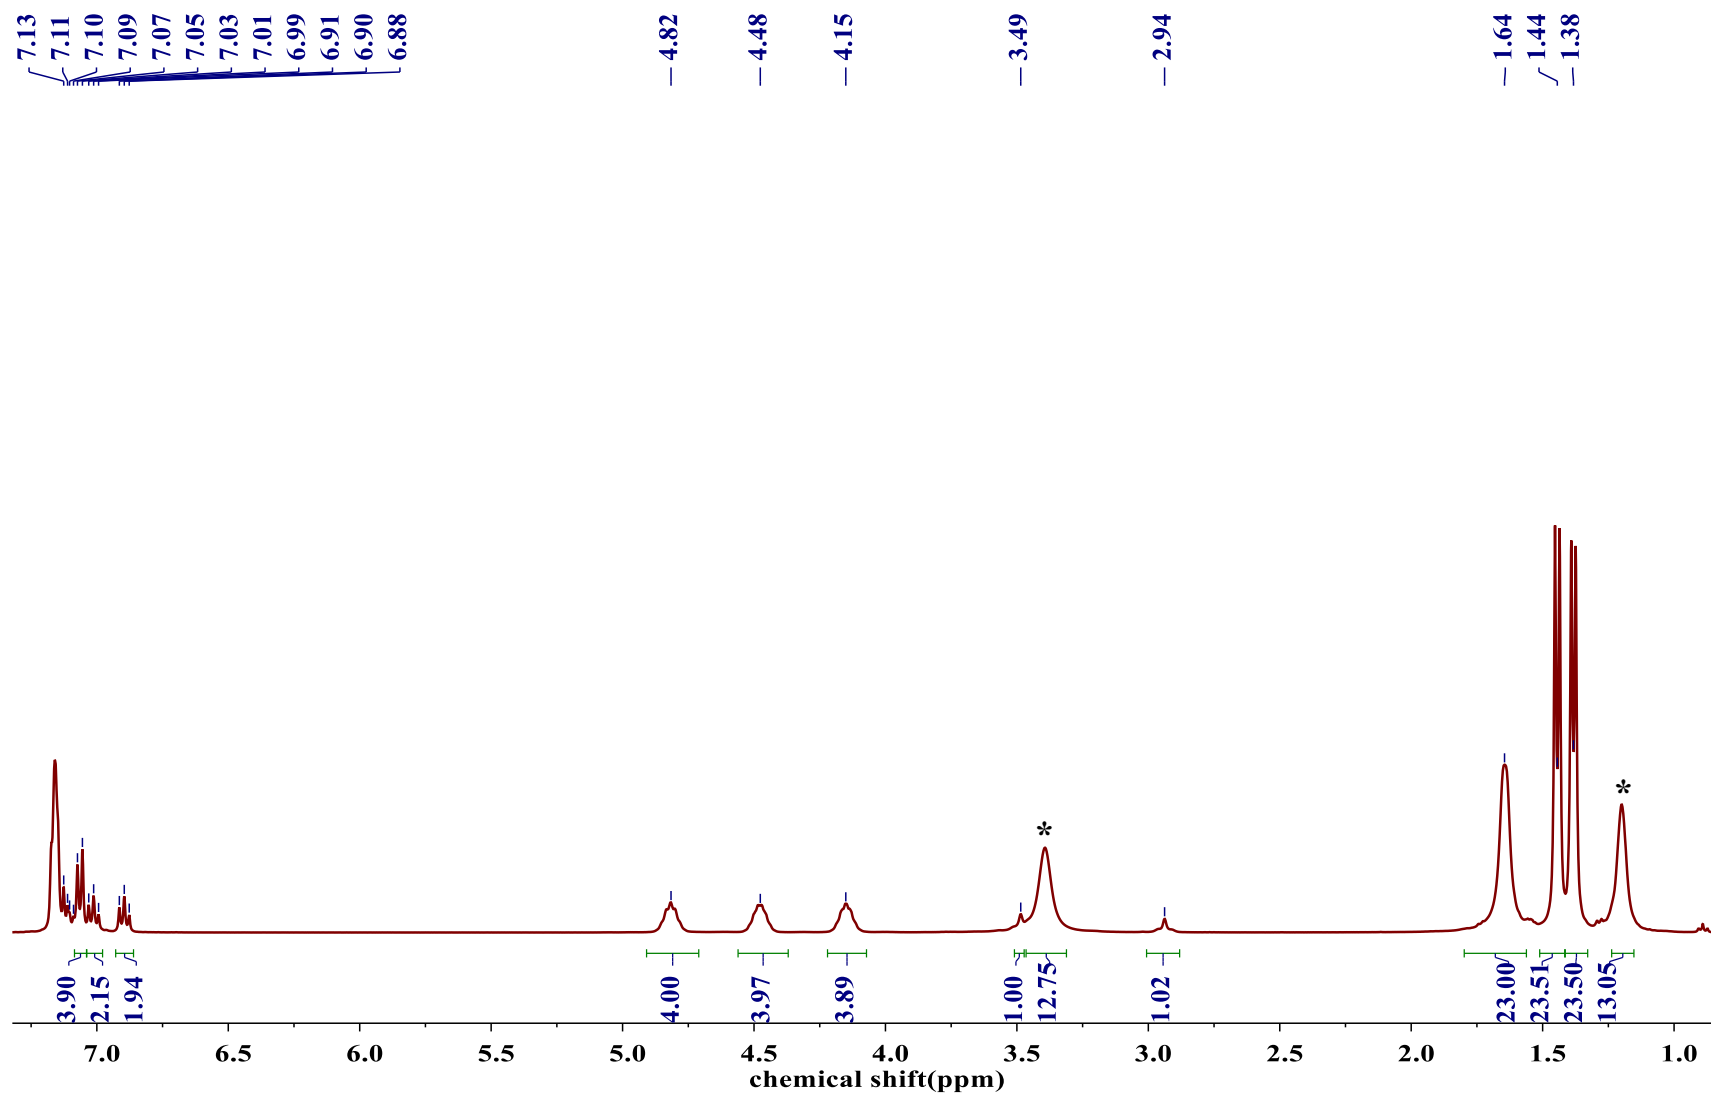

**Fig. S19**  $^1\text{H}$  NMR spectrum of complex **4** (400 MHz,  $\text{C}_6\text{D}_6$  with a drop of  $d_8$ -THF, 25  $^\circ\text{C}$ ). Asterisks denote THF.

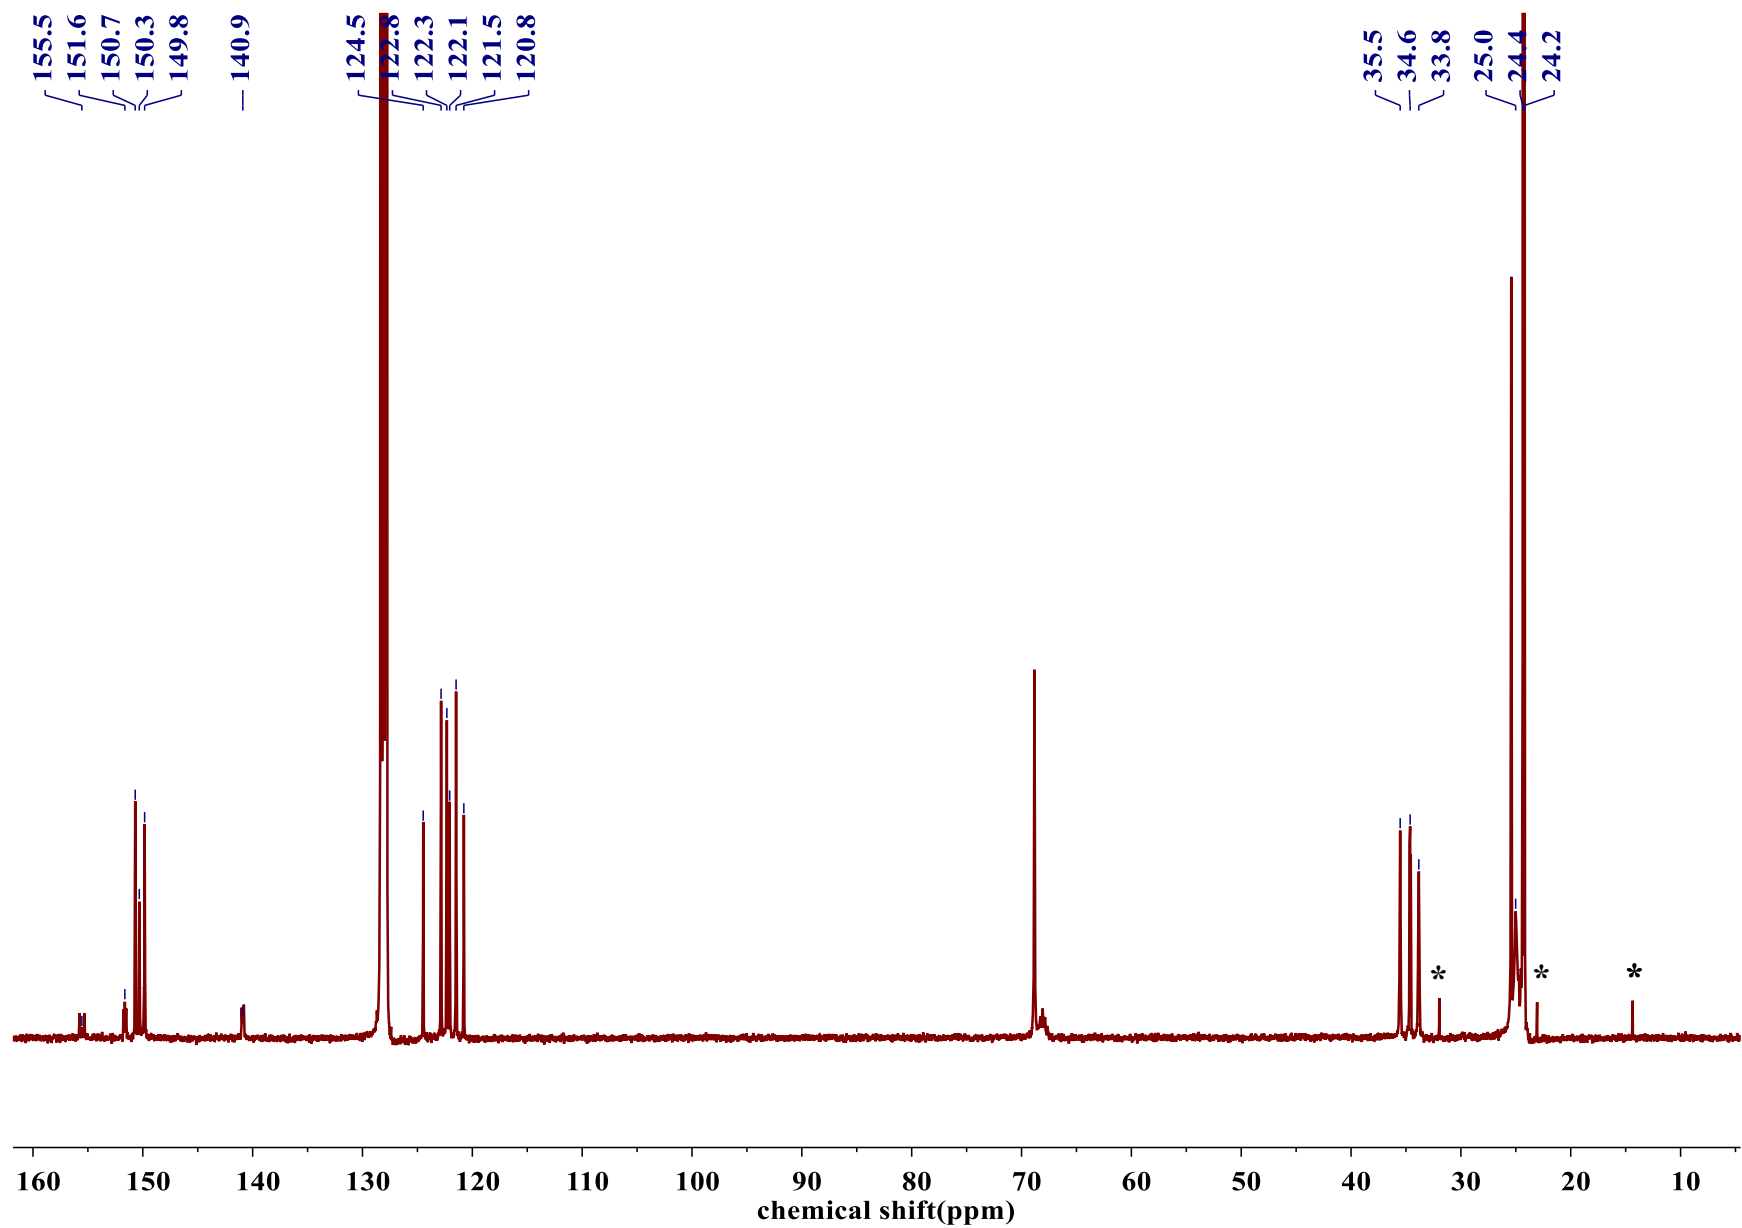

**Fig. S20**  $^{13}\text{C}\{^1\text{H}\}$  NMR spectrum of complex **4** (100 MHz,  $\text{C}_6\text{D}_6$  with a drop of  $d_8$ -THF, 25 °C). Asterisks denote the residue *n*-hexane.

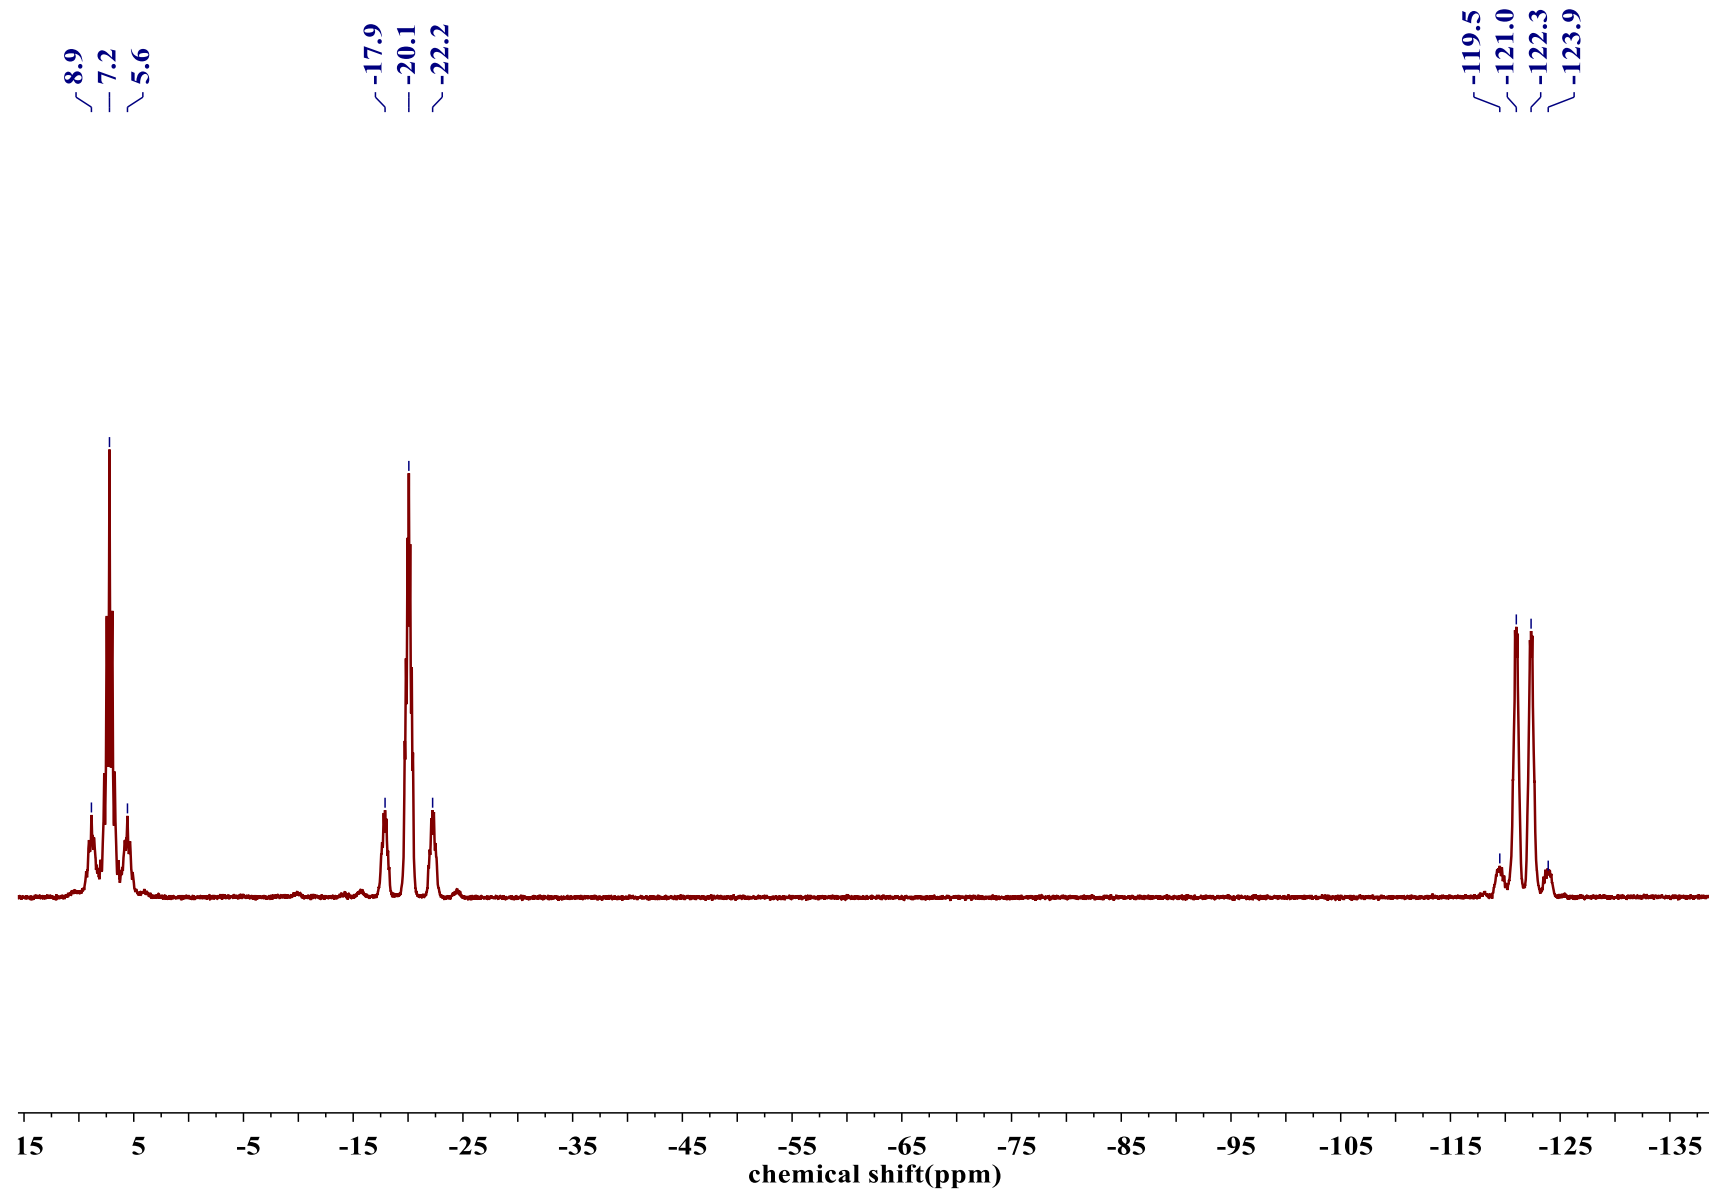

**Fig. S21**  $^{31}\text{P}$  NMR spectrum of complex **4** (162 MHz,  $\text{C}_6\text{D}_6$  with a drop of  $d_8$ -THF, 25 °C).

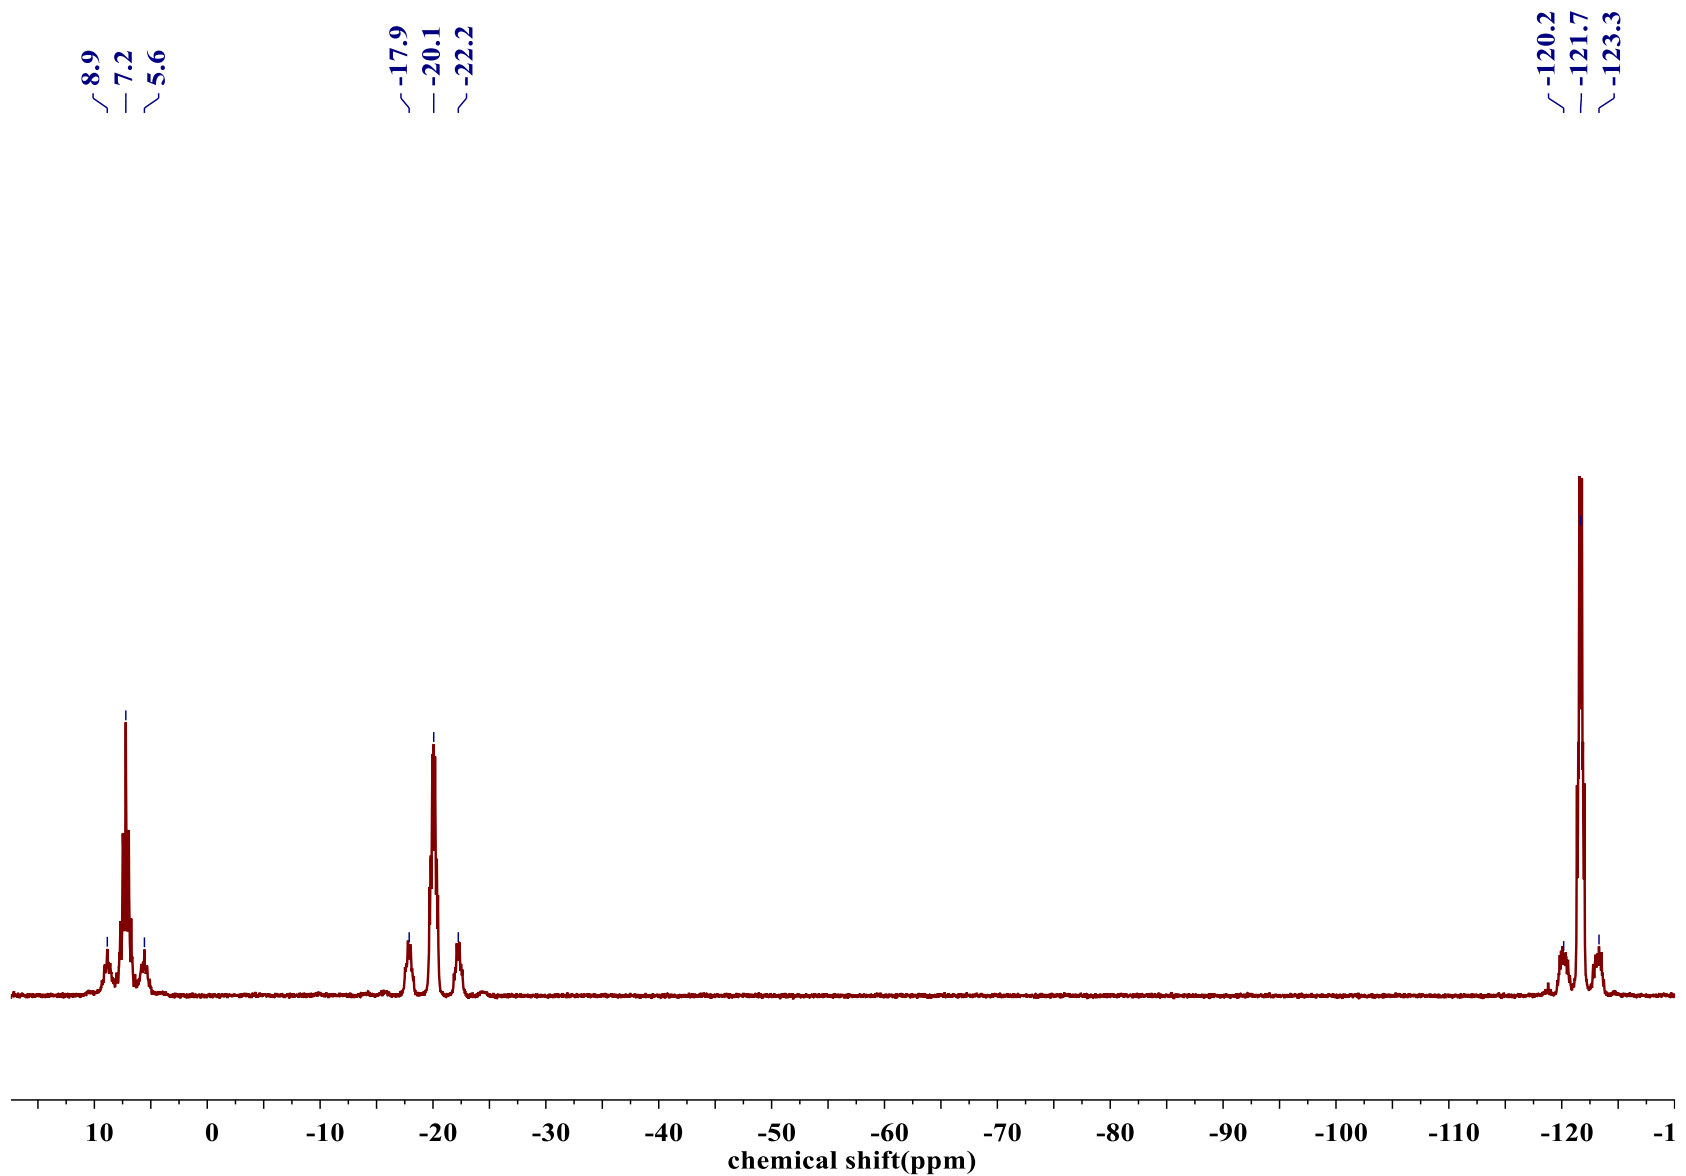

**Fig. S22**  $^{31}\text{P}\{^1\text{H}\}$  NMR spectrum of complex **4** (162 MHz,  $\text{C}_6\text{D}_6$  with a drop of  $d_8$ -THF, 25 °C).

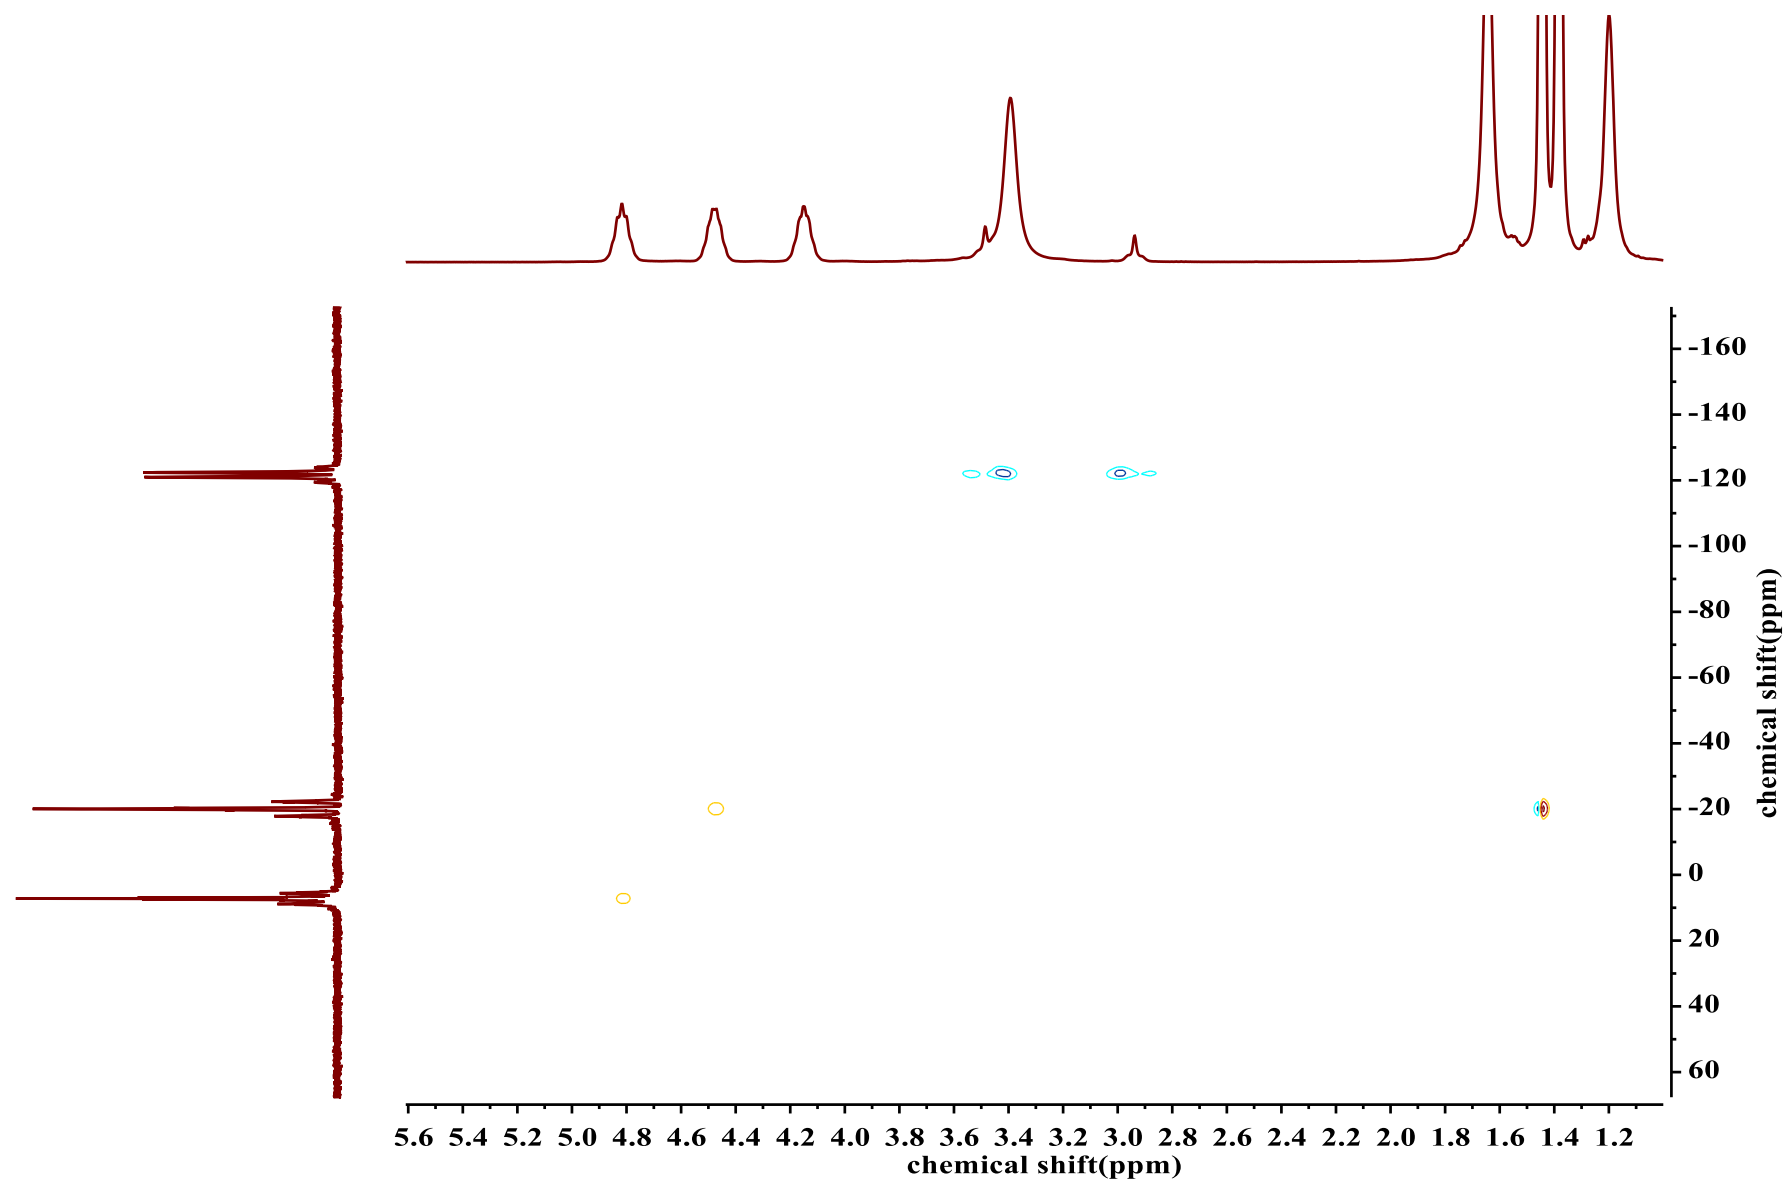

**Fig. S23**  $^1\text{H}$  $^{31}\text{P}$  HSQC spectra of complex **4** (400/162 MHz,  $\text{C}_6\text{D}_6$  with a drop of  $d_8$ -THF, 25  $^\circ\text{C}$ ).

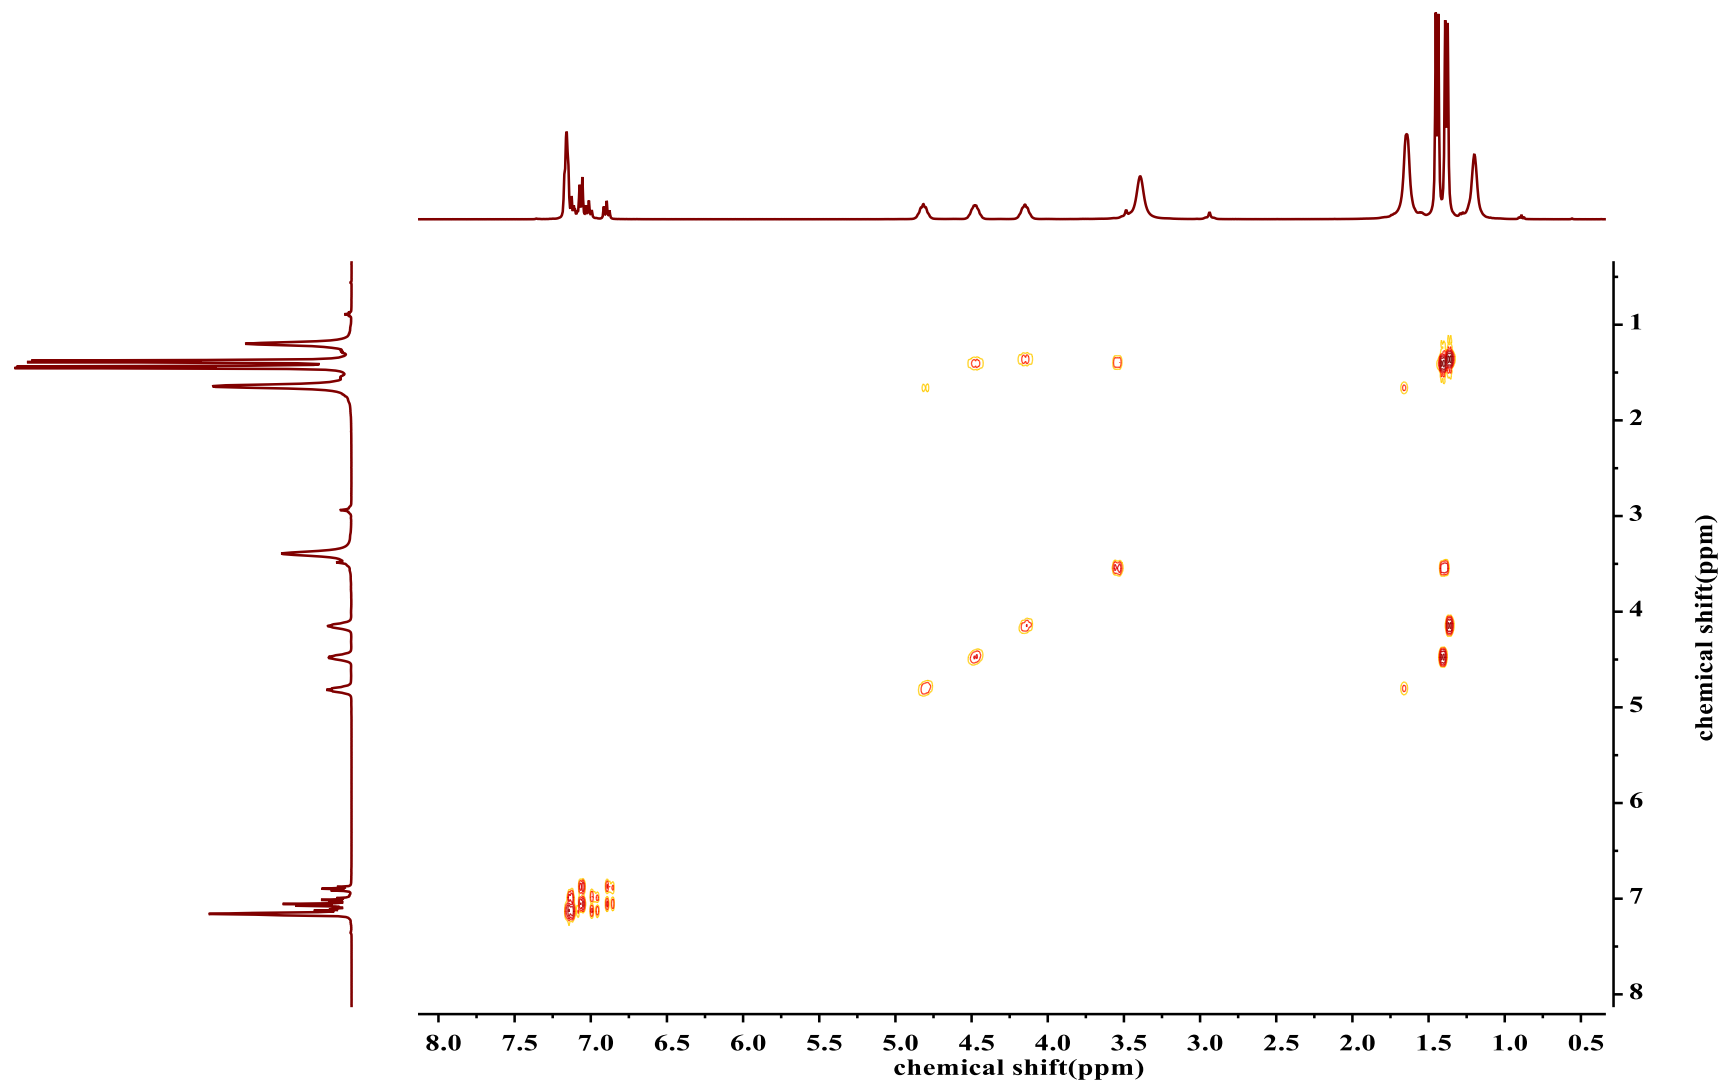

**Fig. S24** gCOSY spectra of complex **4** (400 MHz, C<sub>6</sub>D<sub>6</sub> with a drop of *d*<sub>8</sub>-THF, 25 °C).

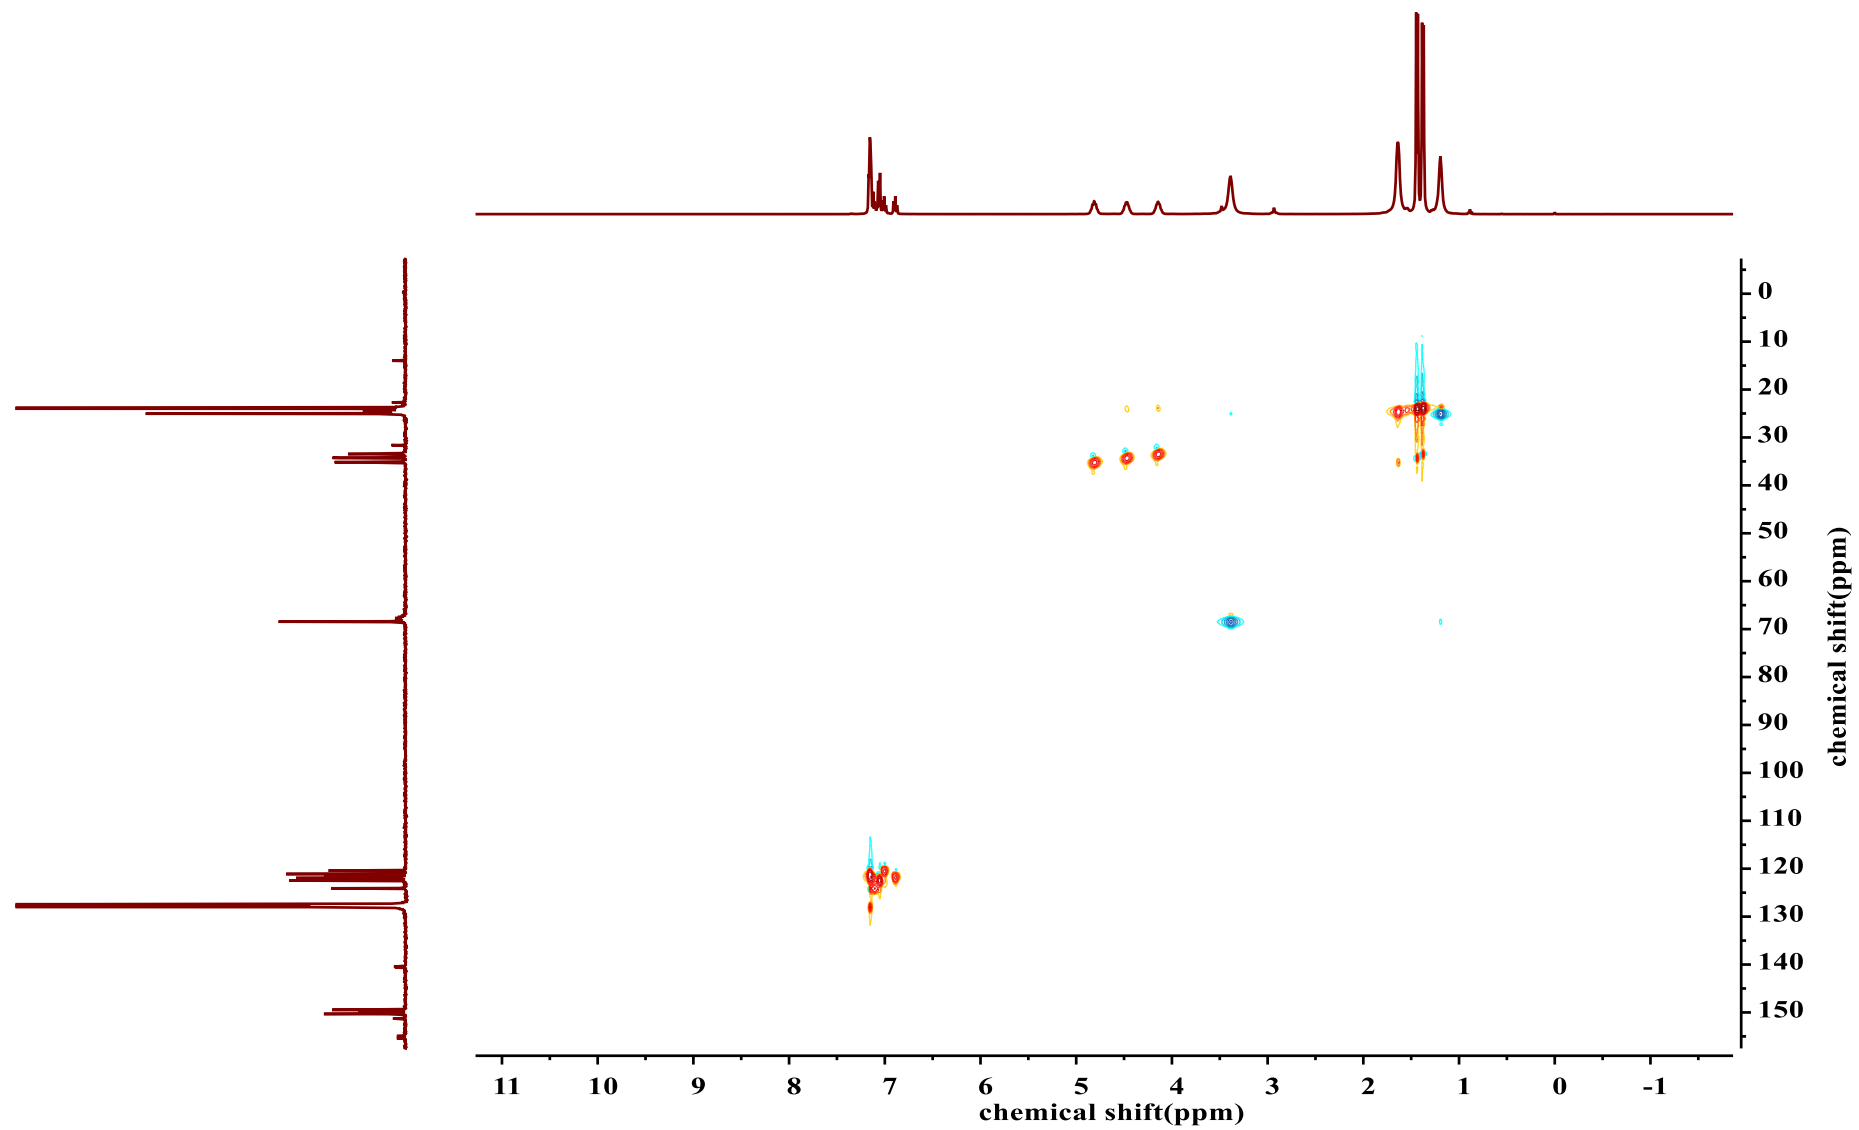

**Fig. S25** gHSQC spectra of complex **4** (400 MHz,  $\text{C}_6\text{D}_6$  with a drop of  $d_8$ -THF, 25 °C).

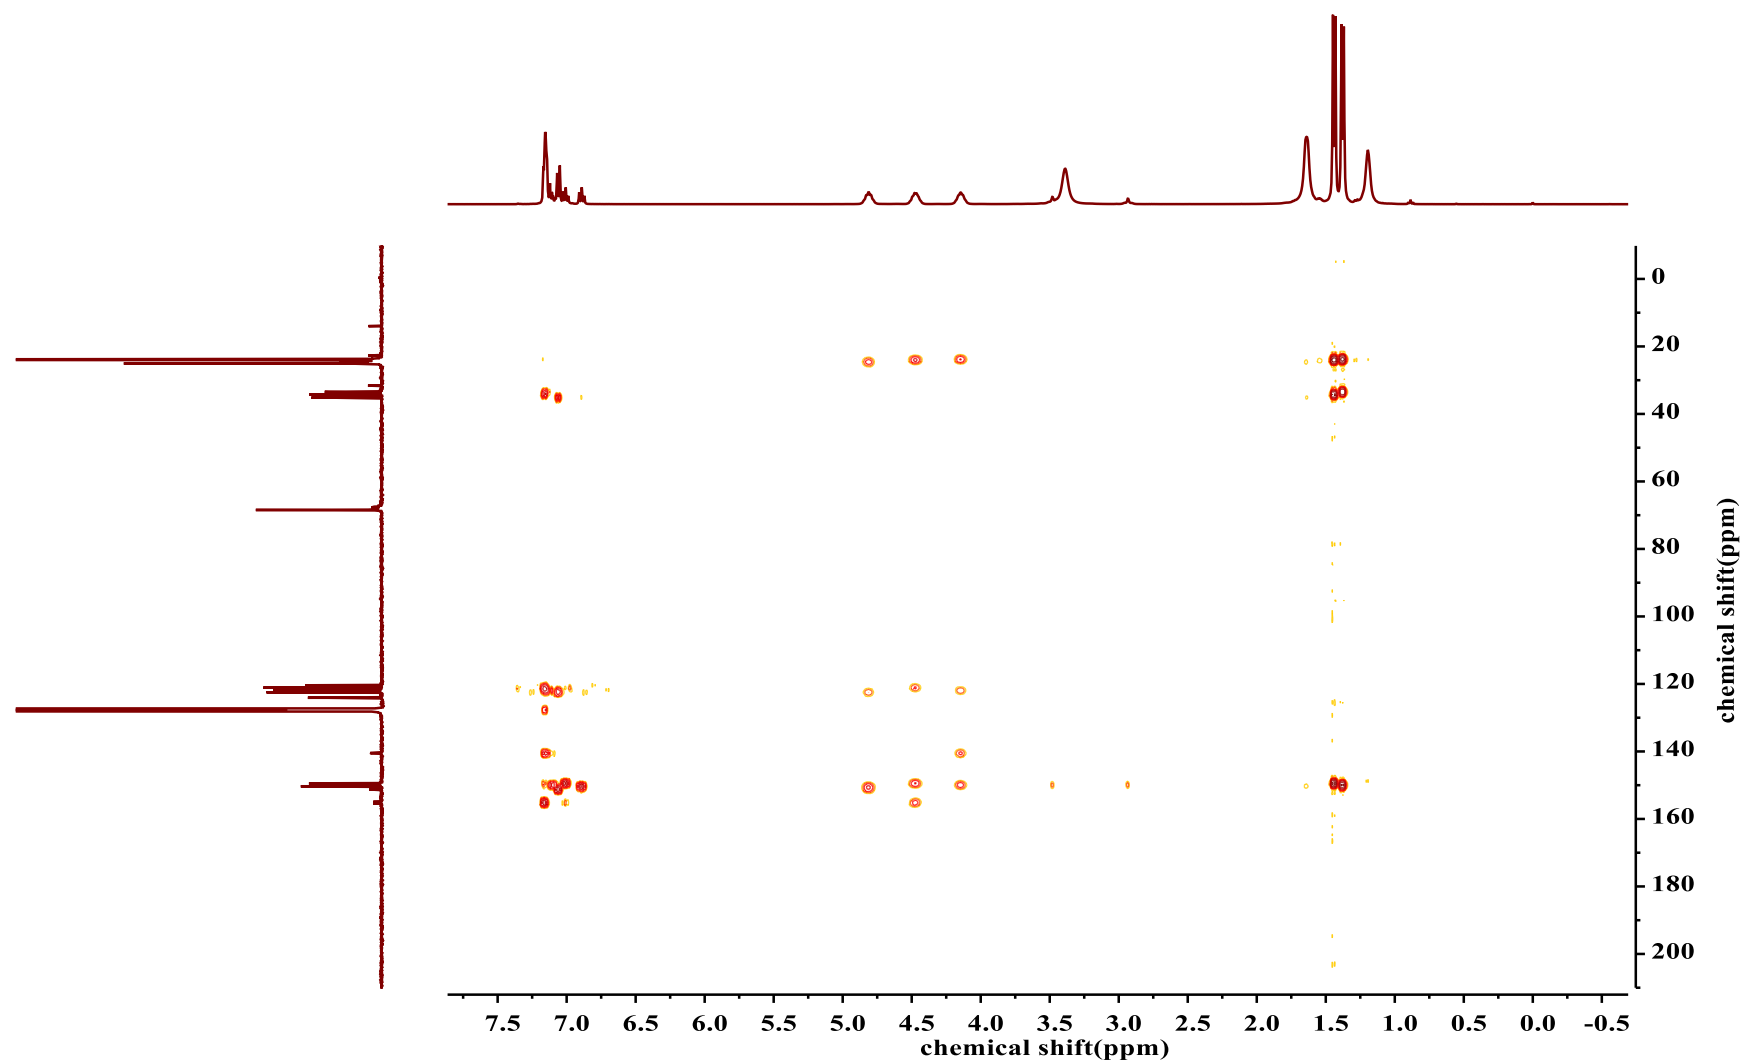

**Fig. S26** gHMBC spectra of complex **4** (400 MHz, C<sub>6</sub>D<sub>6</sub> with a drop of *d*<sub>8</sub>-THF, 25 °C).

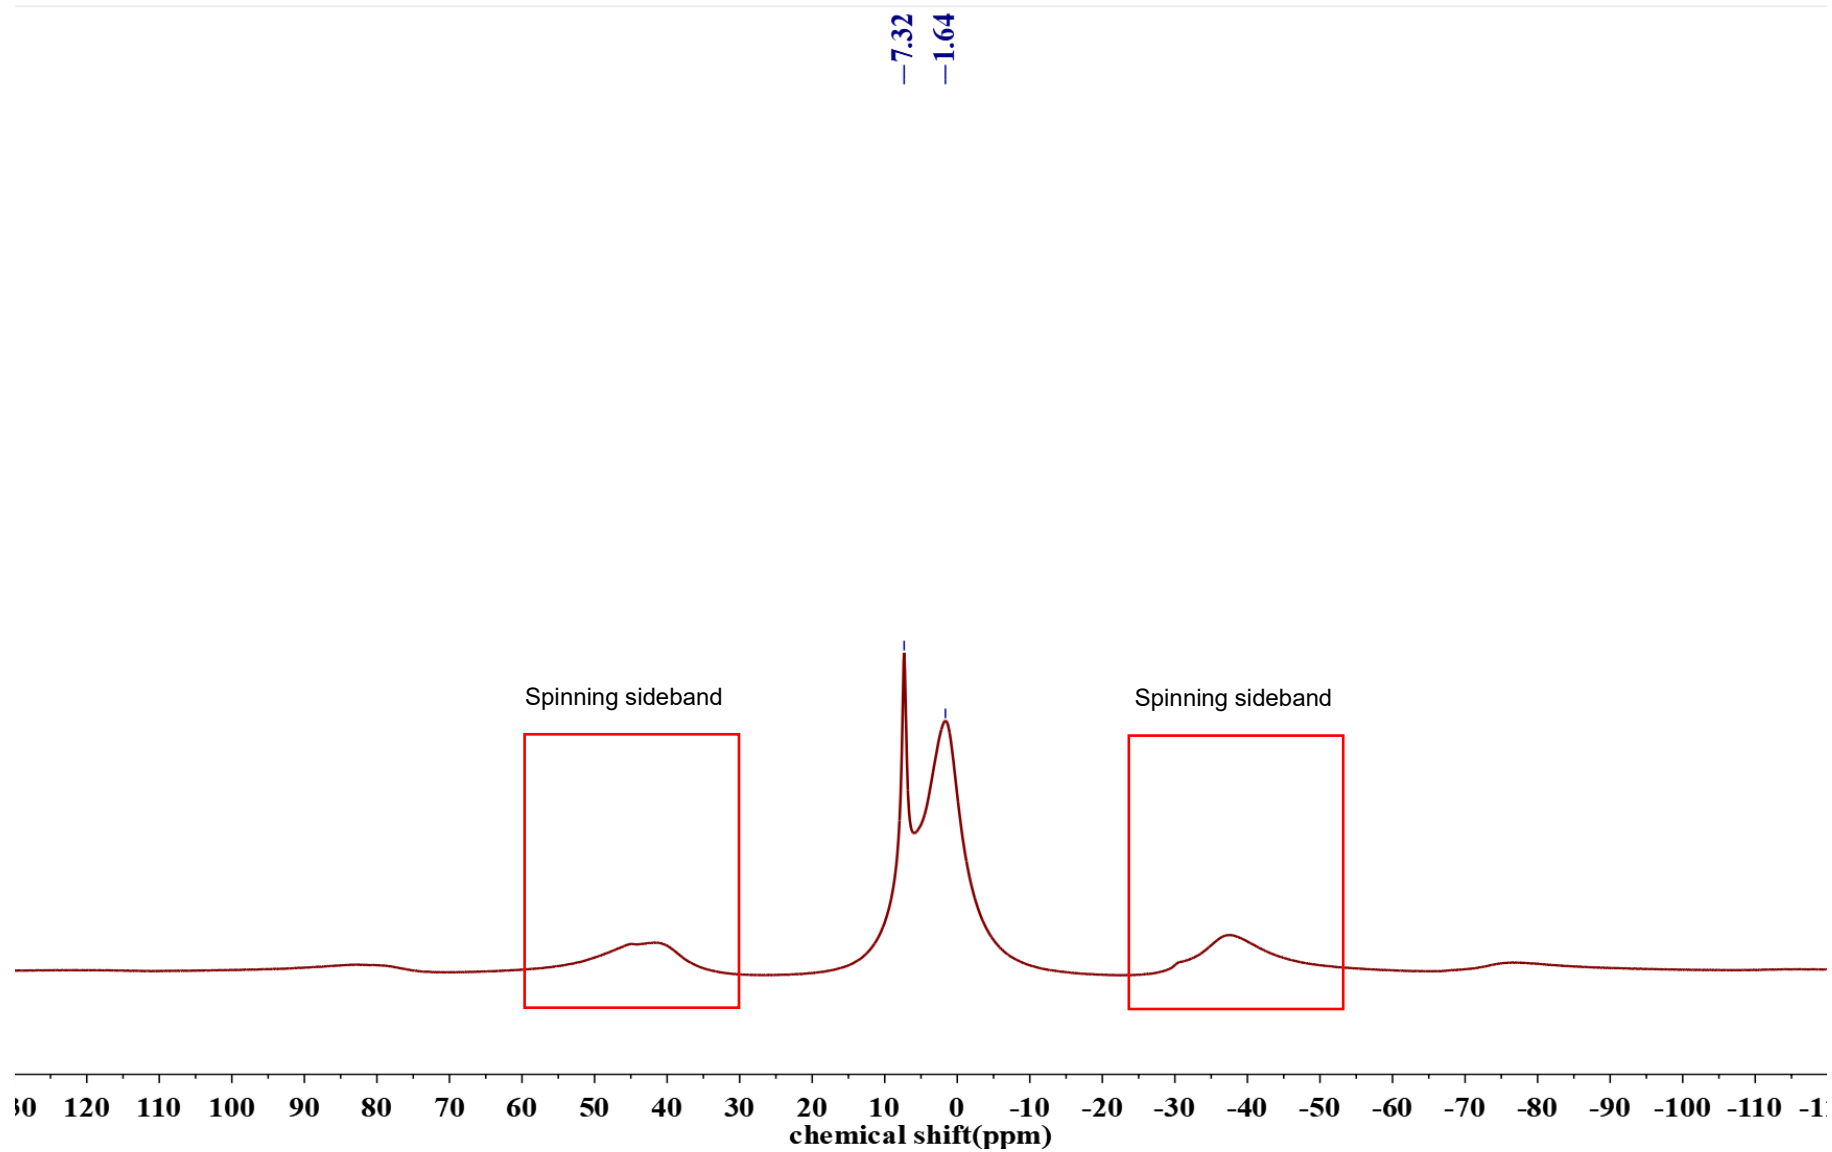

**Fig. S27**  $^1\text{H}$  solid-state NMR spectrum of complex **5** (400 MHz, 25 °C).

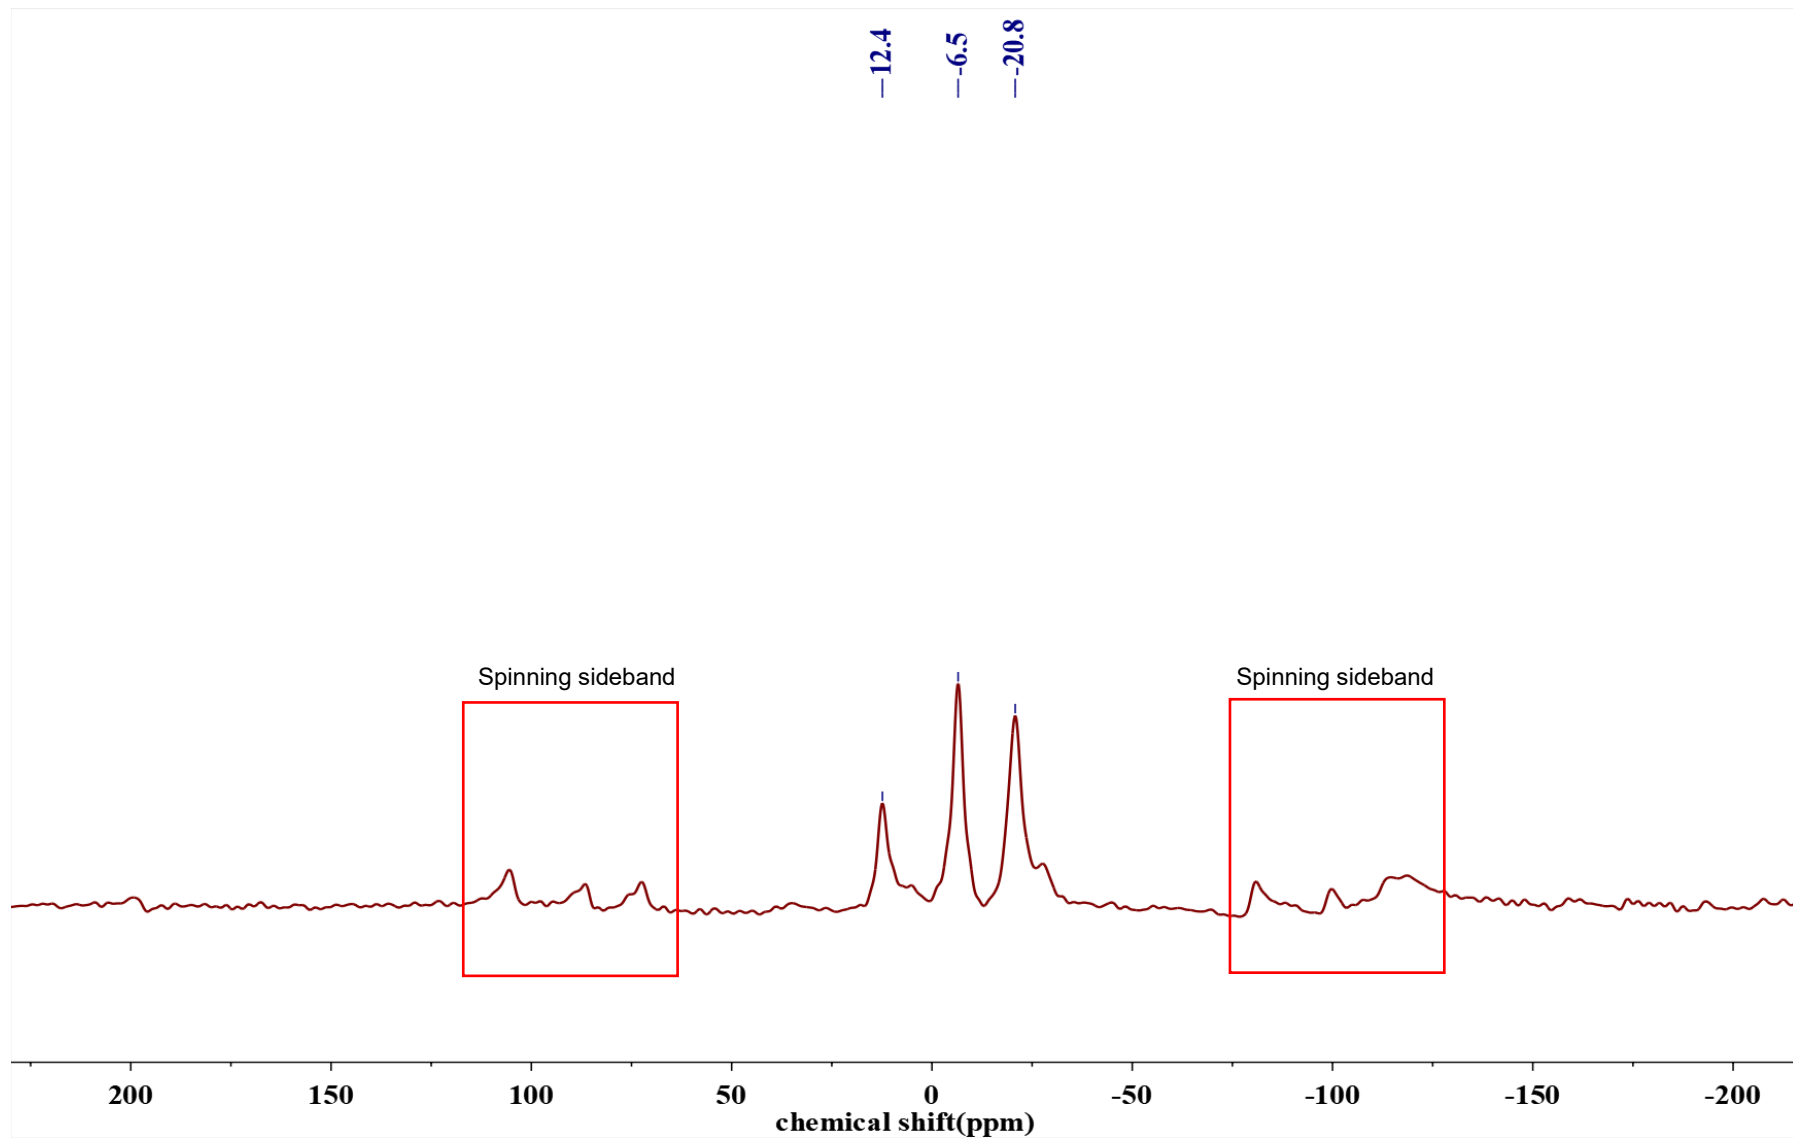

**Fig. S28**  $^{31}\text{P}$  solid-state NMR spectrum of complex 5 (162 MHz, 25 °C).

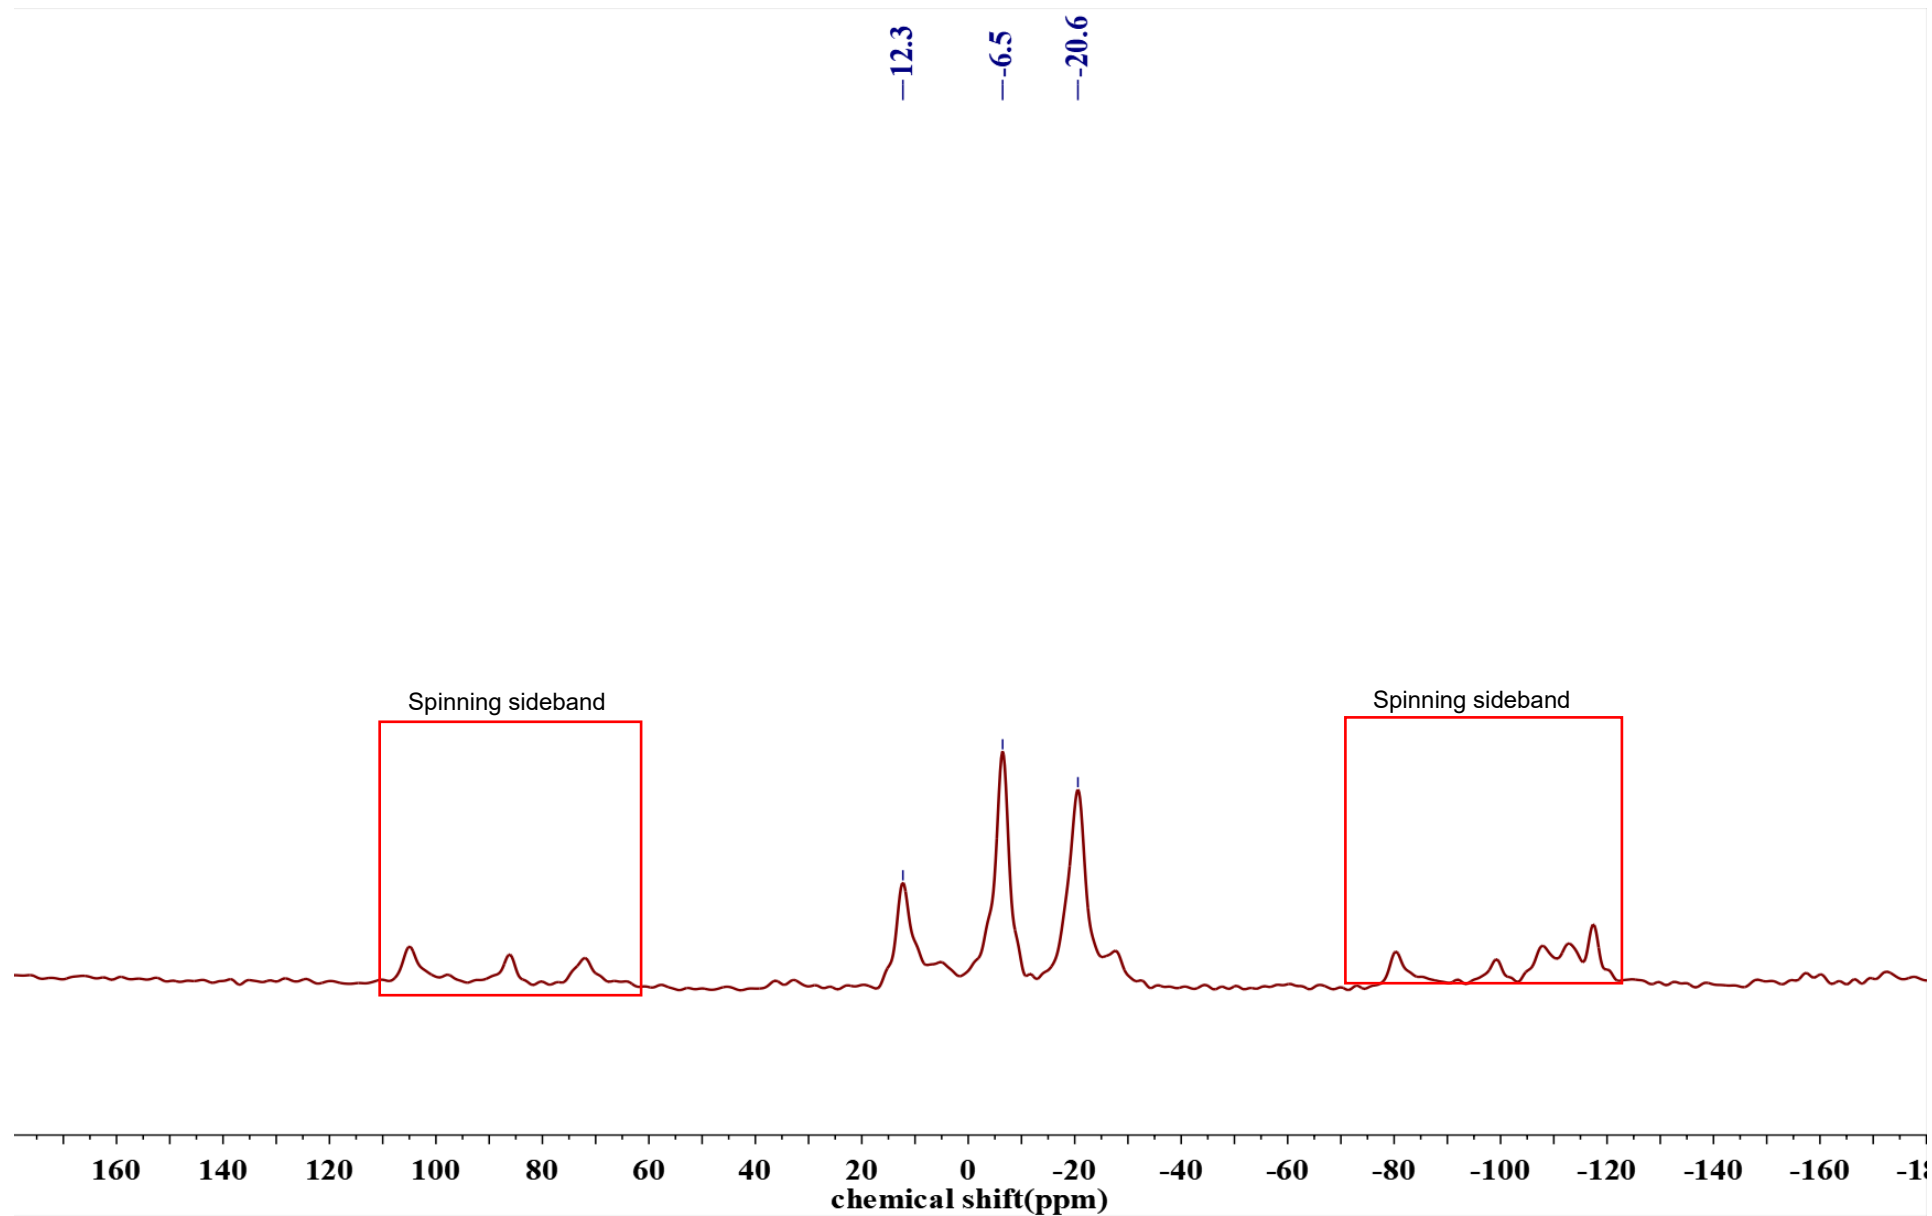

**Fig. S29**  $^{31}\text{P}\{^1\text{H}\}$  solid-state NMR spectrum of complex **5** (162 MHz, 25 °C).

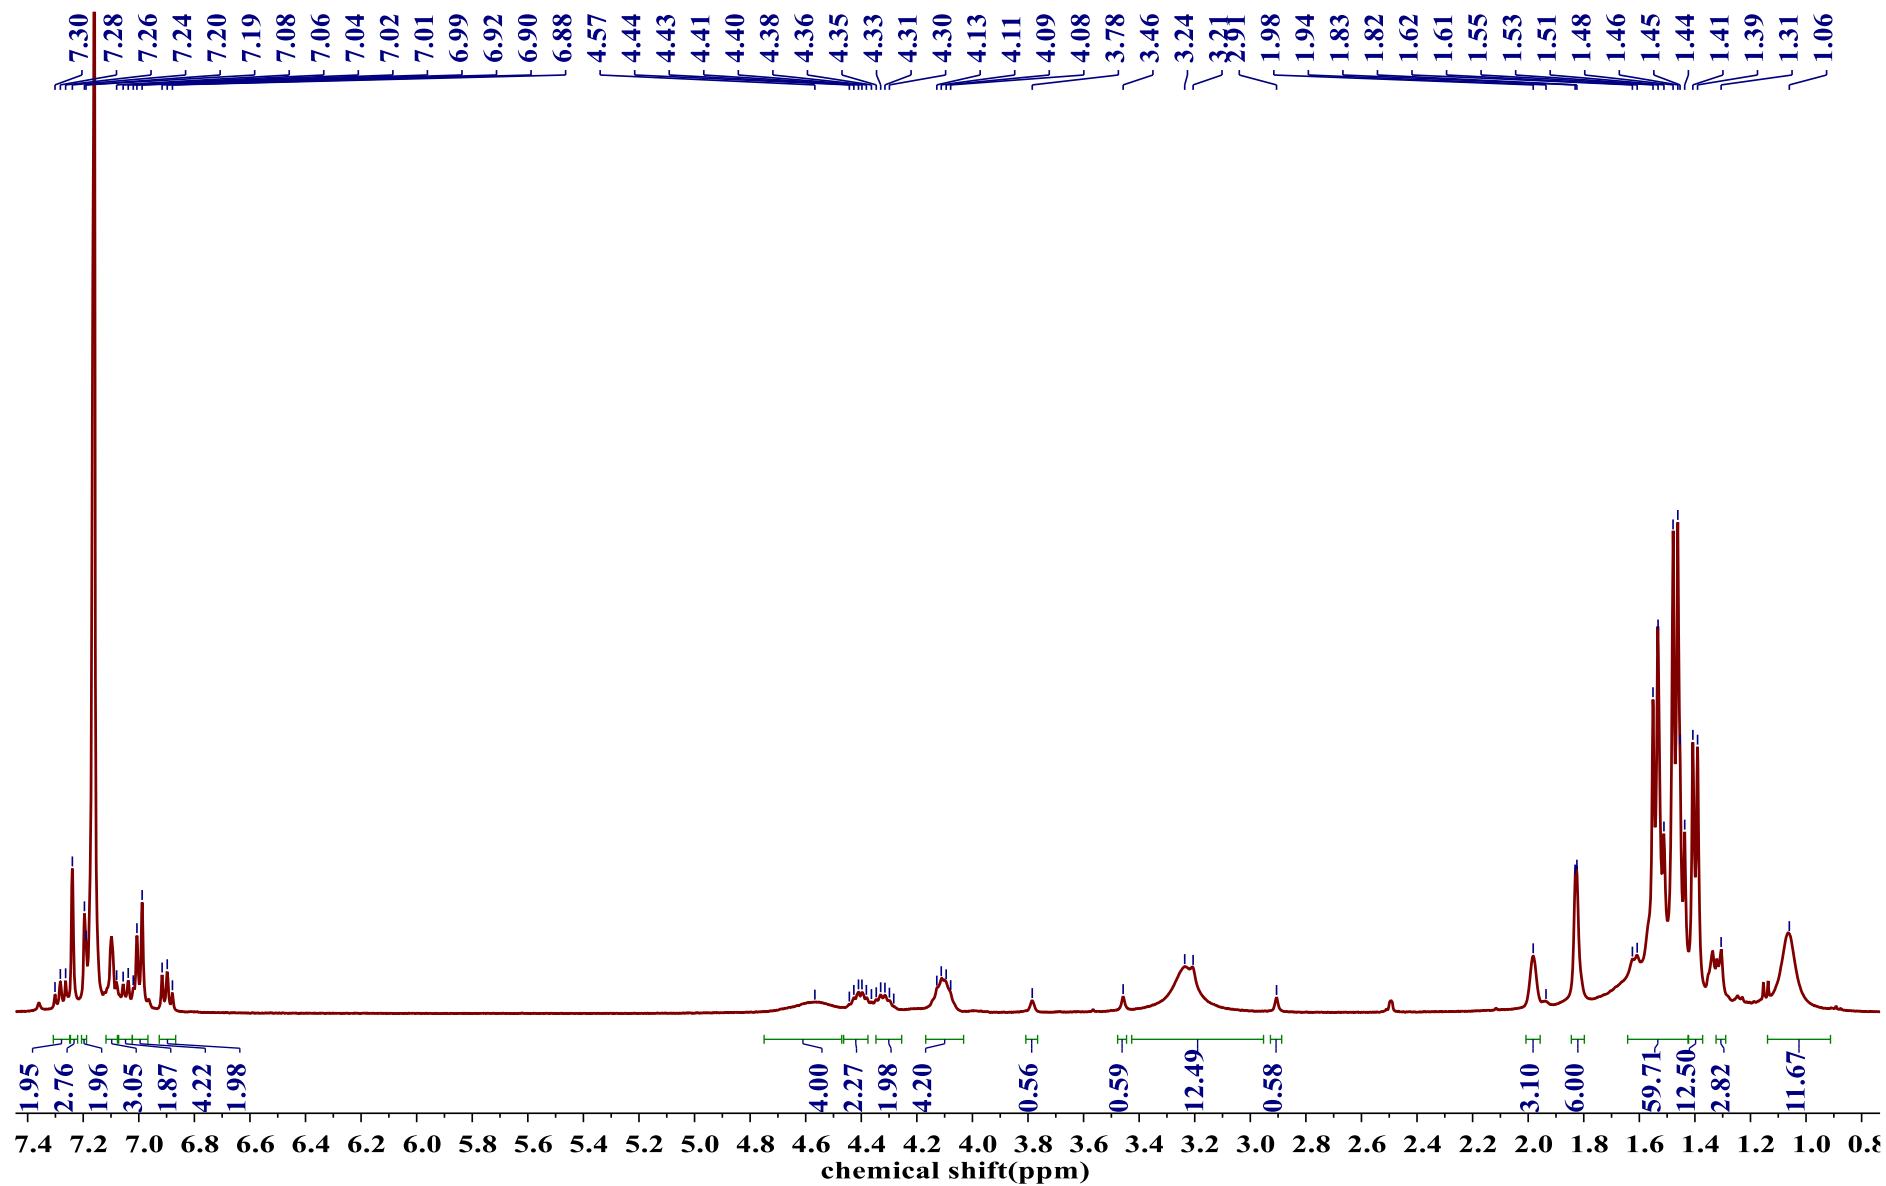

Fig. S30 <sup>1</sup>H NMR spectrum of complex 6 (400 MHz, C<sub>6</sub>D<sub>6</sub>, 25 °C).

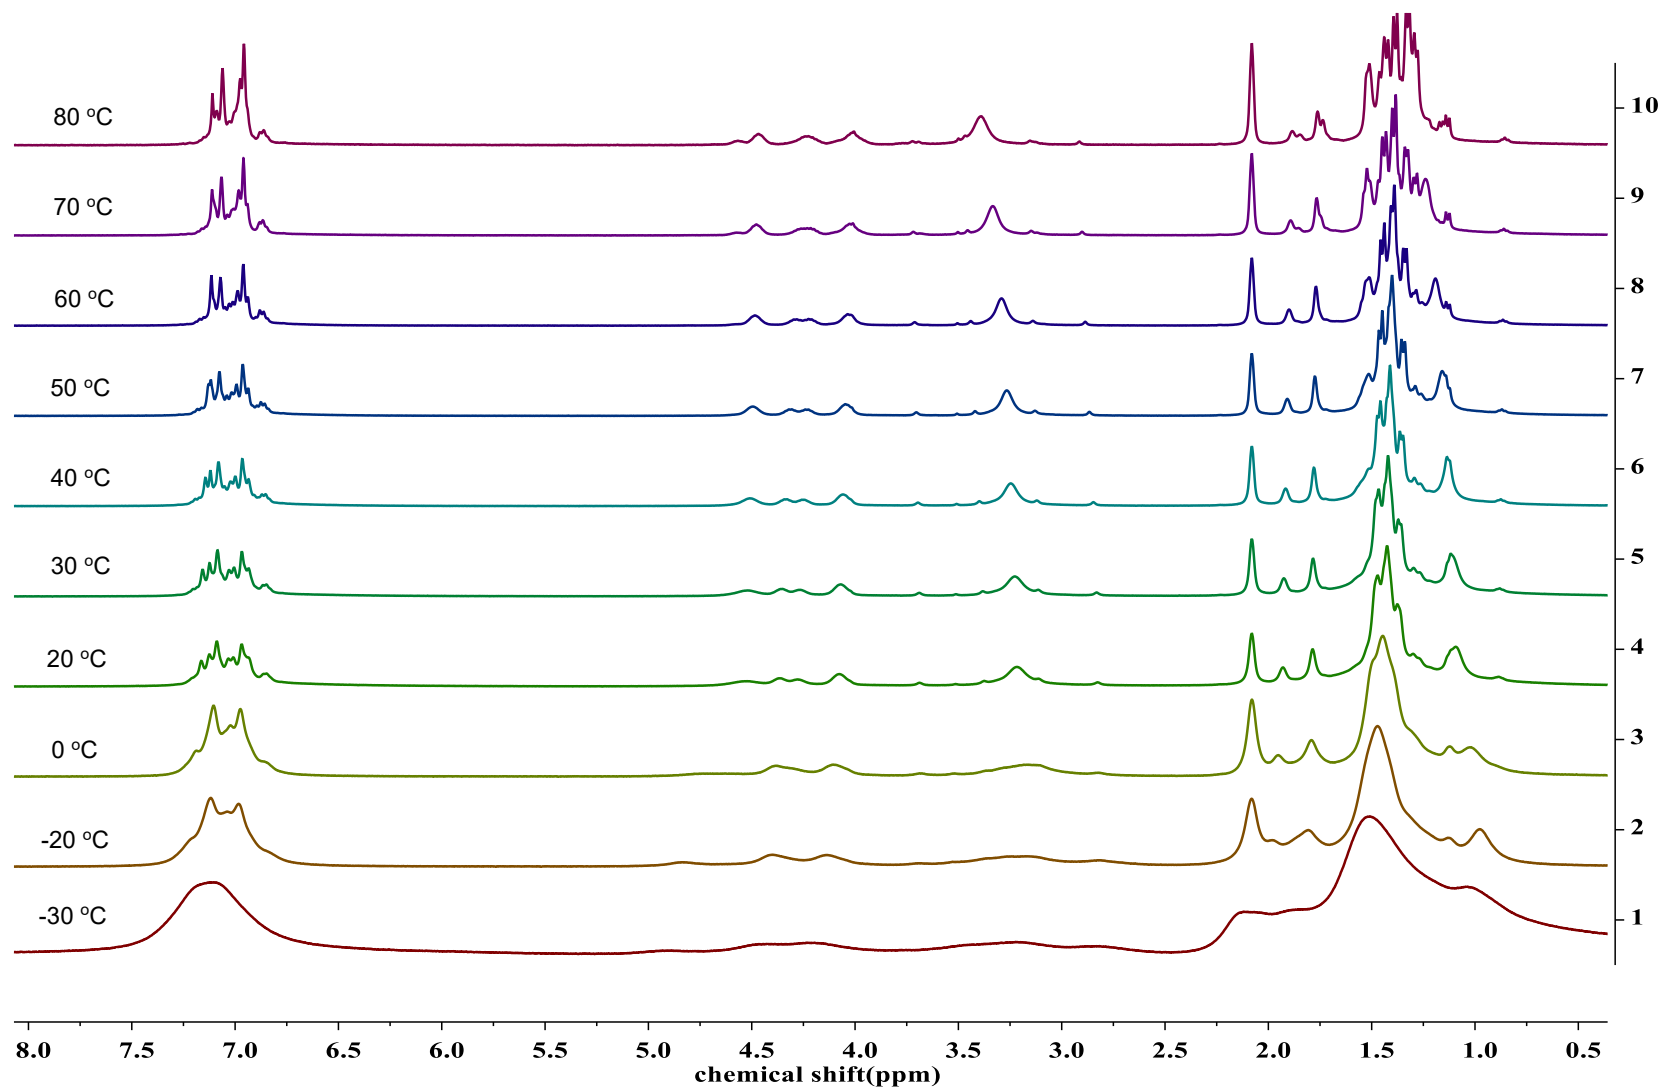

**Fig. S31** Variant temperature <sup>1</sup>H NMR spectrum of complex **6** (400 MHz, *d*<sub>8</sub>-toluene, -30, -20, -0, 20, 30, 40, 50, 60, 70 and 80 °C).

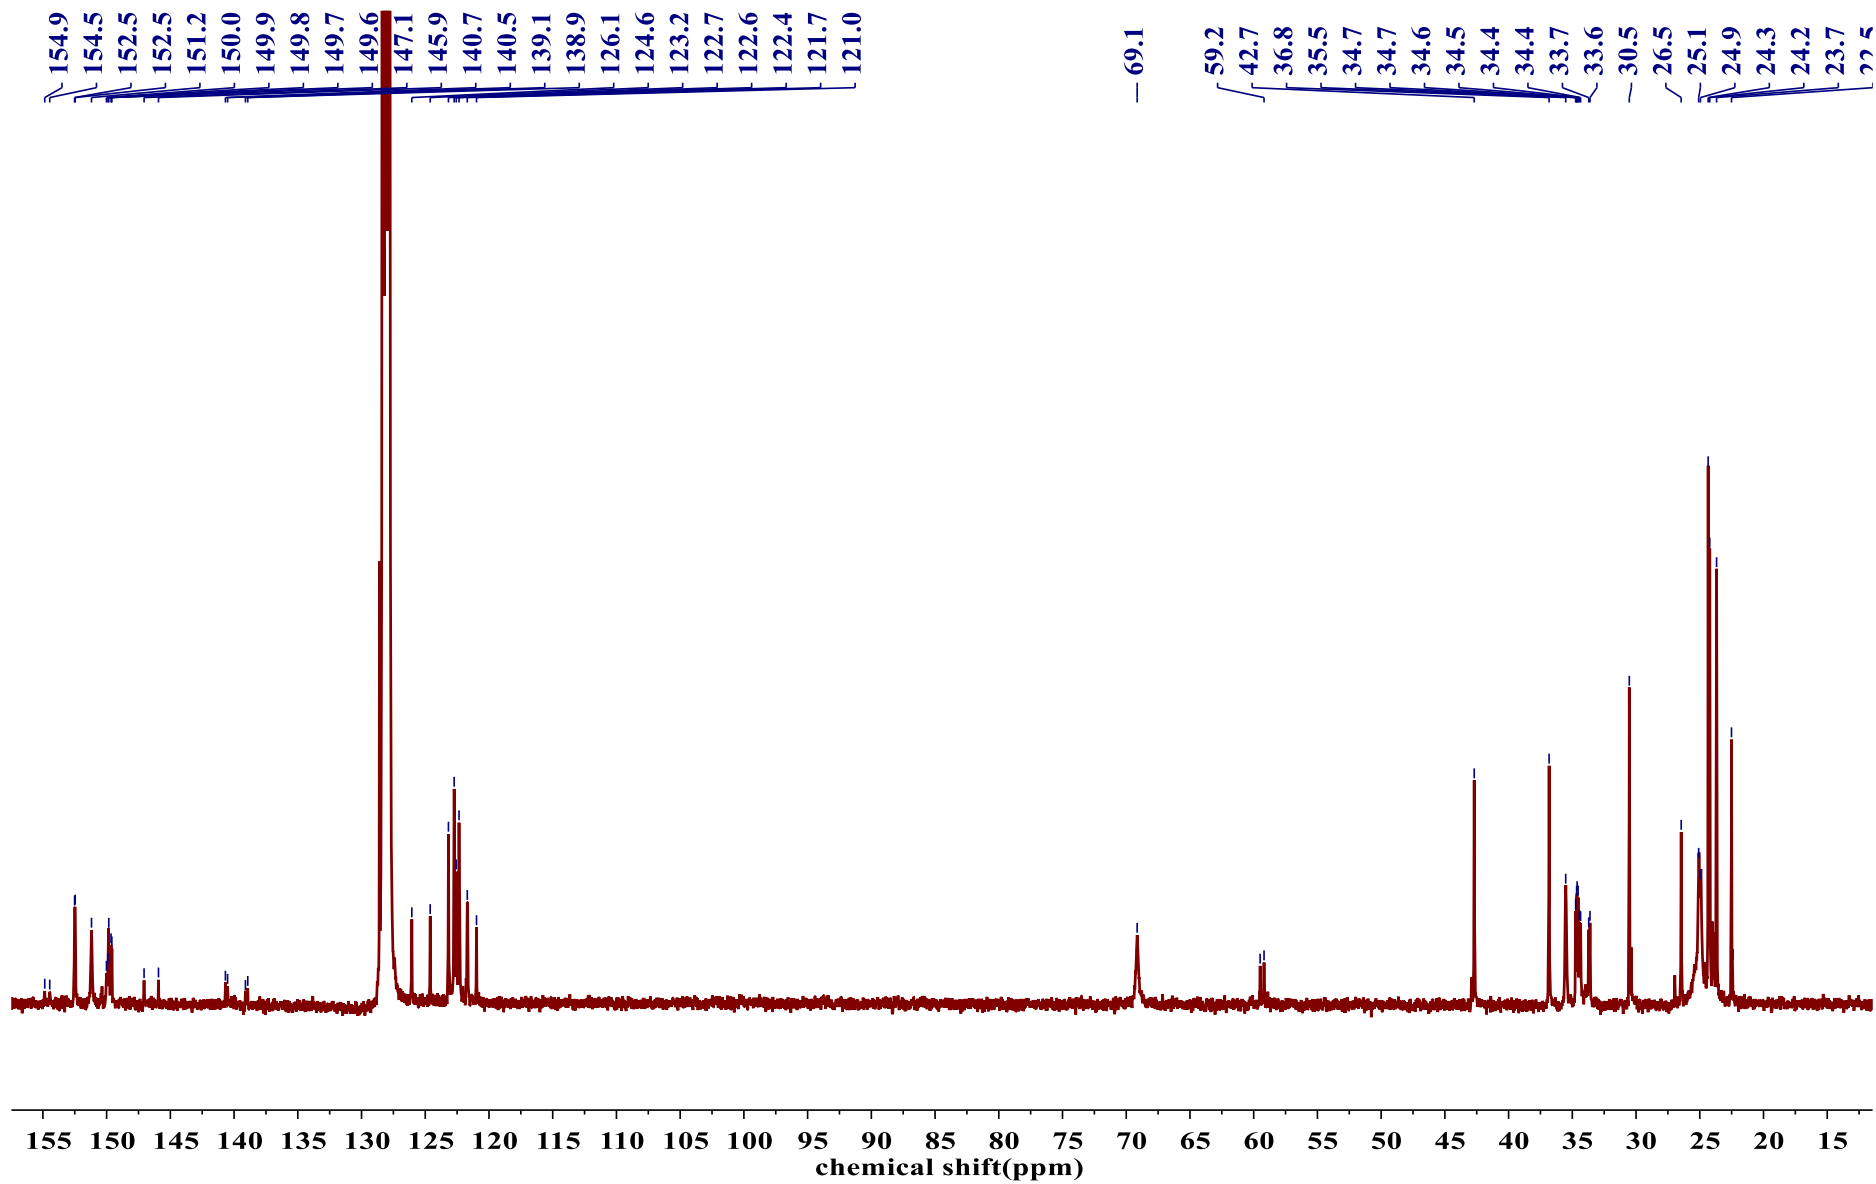

**Fig. S32**  $^{13}\text{C}\{^1\text{H}\}$  NMR spectrum of complex **6** (100 MHz,  $\text{C}_6\text{D}_6$ , 25 °C).

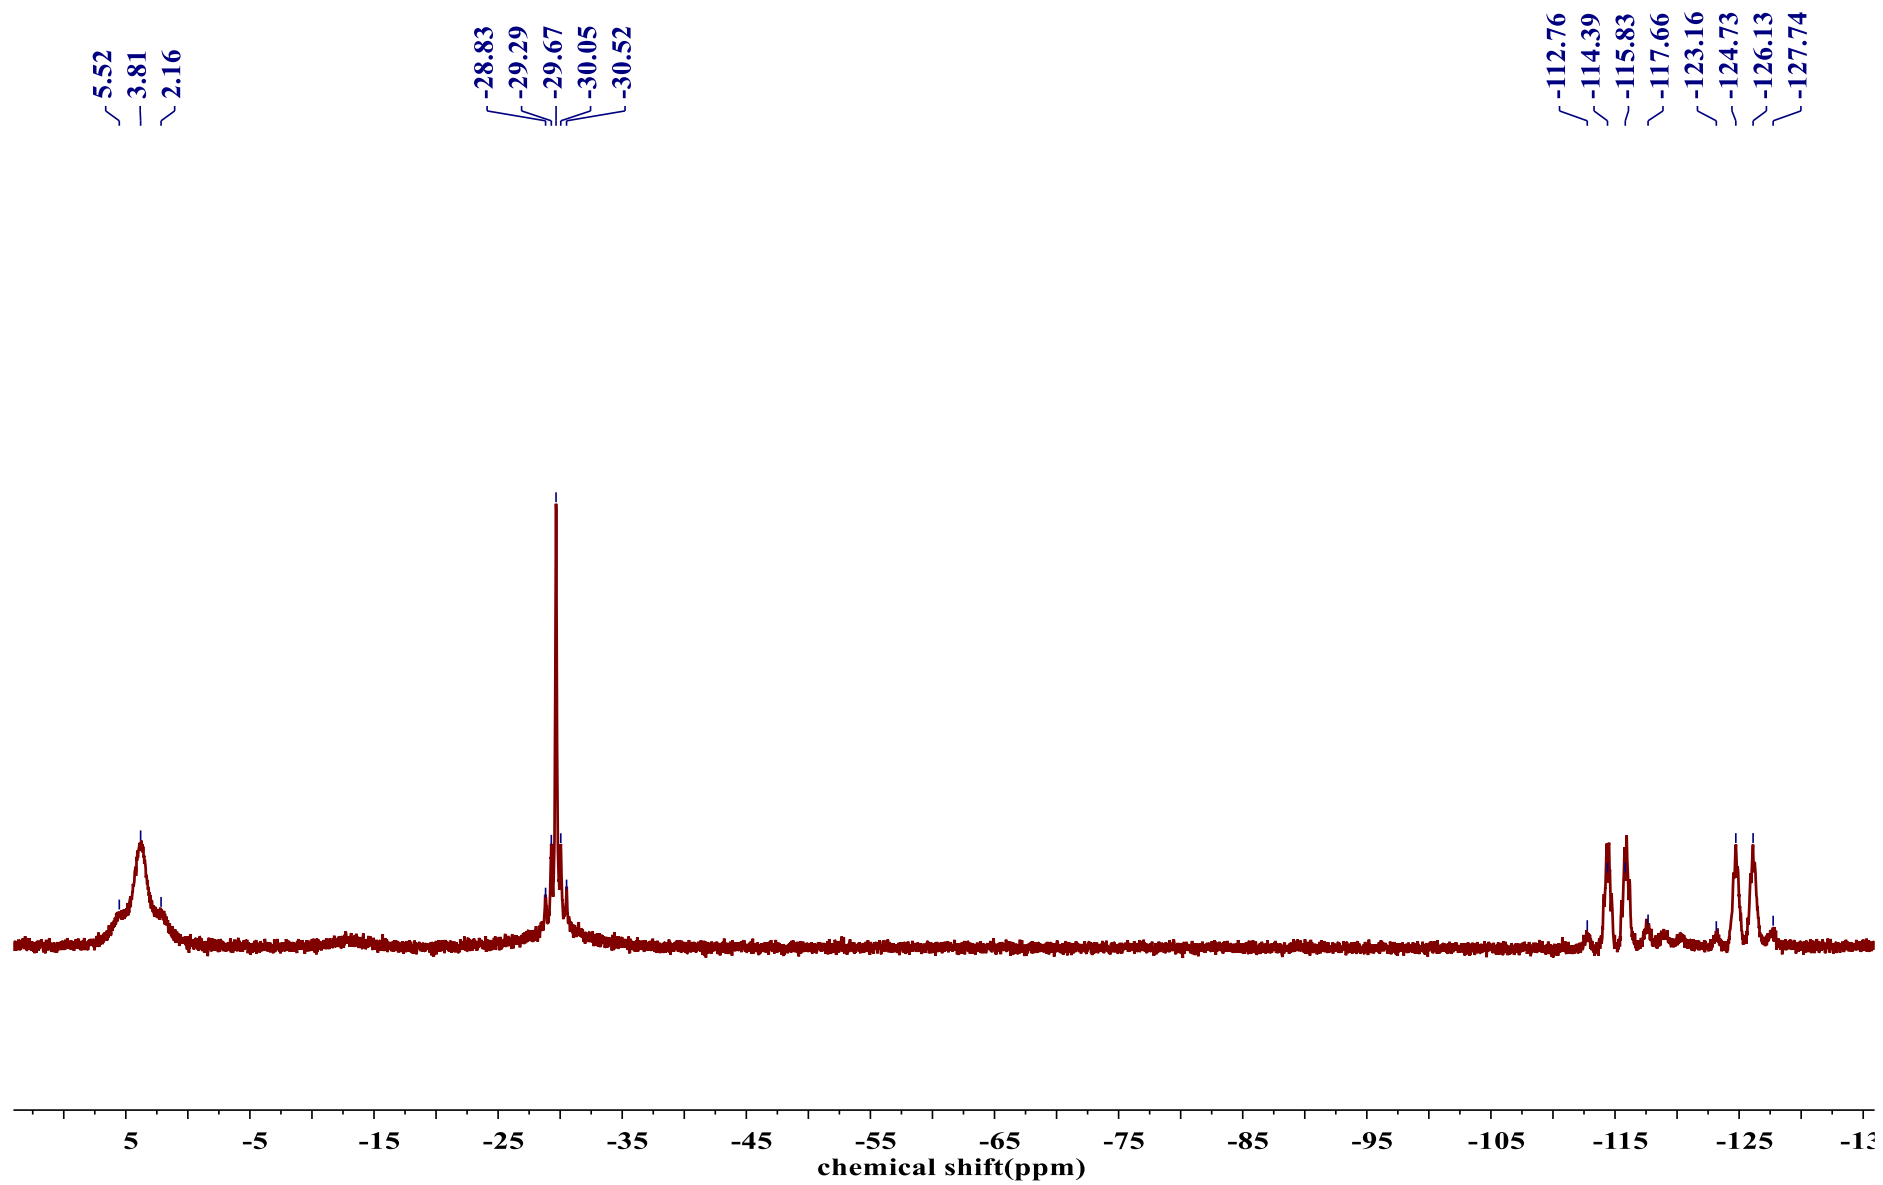

**Fig. S33**  $^{31}\text{P}$  NMR spectrum of complex **6** (162 MHz,  $\text{C}_6\text{D}_6$ , 25 °C).

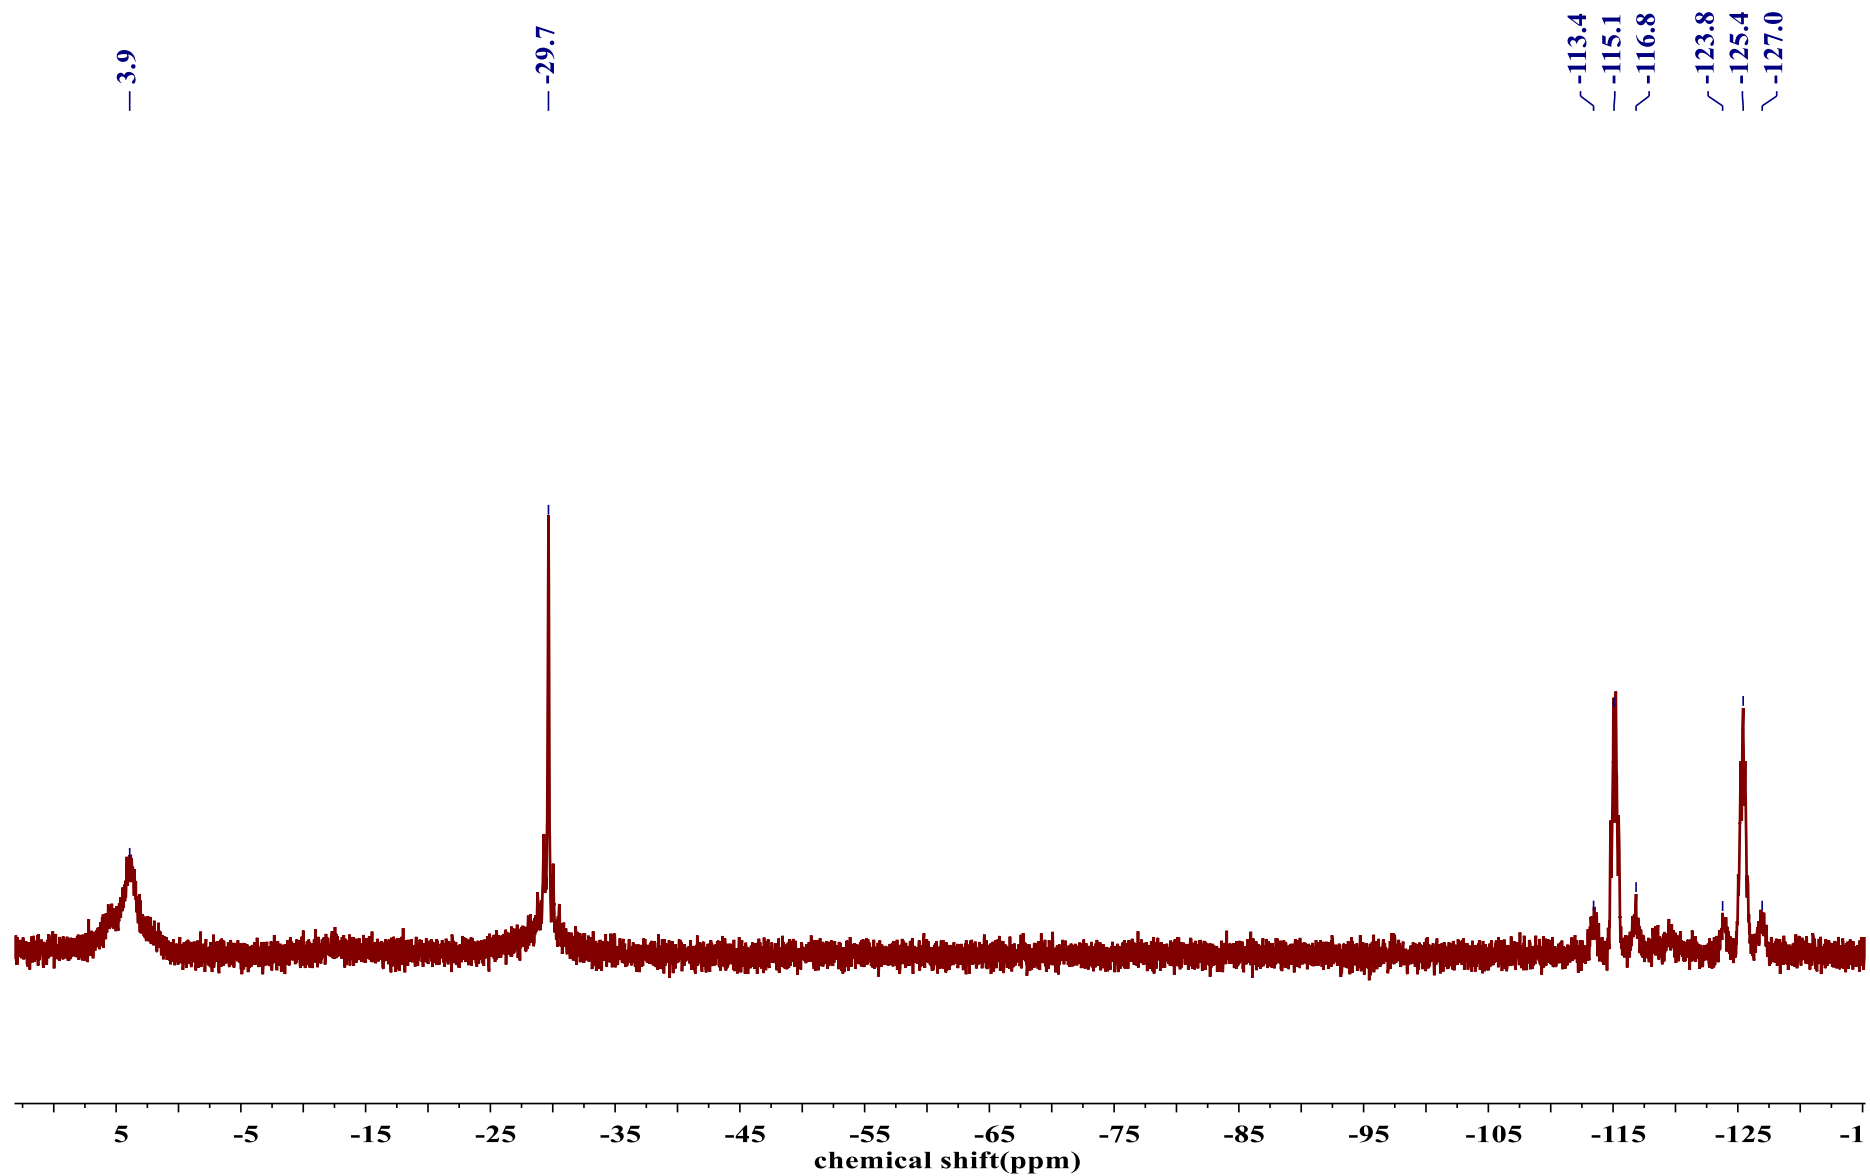

**Fig. S34**  $^{31}\text{P}\{^1\text{H}\}$  NMR spectrum of complex **6** (162 MHz,  $\text{C}_6\text{D}_6$ , 25 °C).

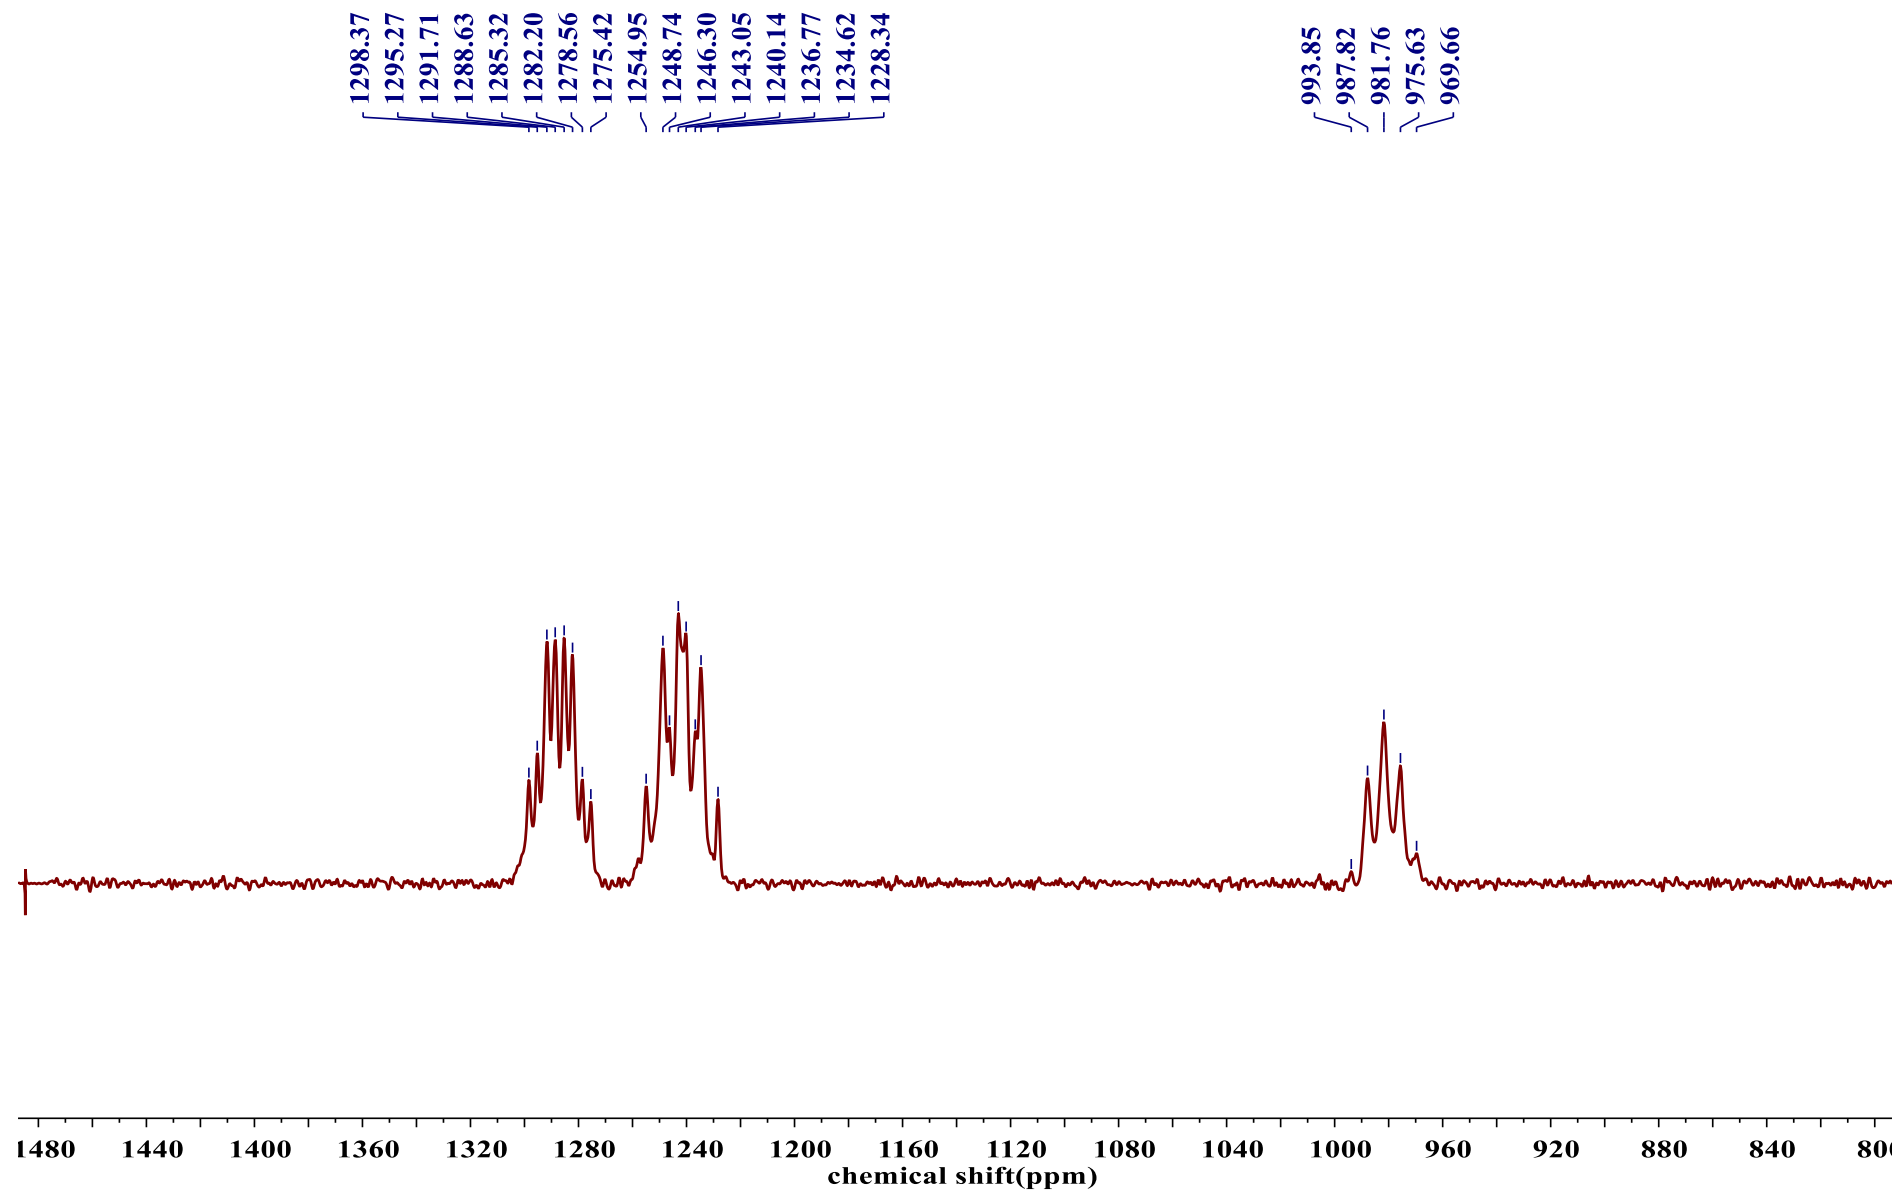

**Fig. S35**  $^{171}\text{Yb}\{^1\text{H}\}$  NMR spectrum of complex **6** (87 MHz,  $\text{C}_6\text{D}_6$ , 25 °C).

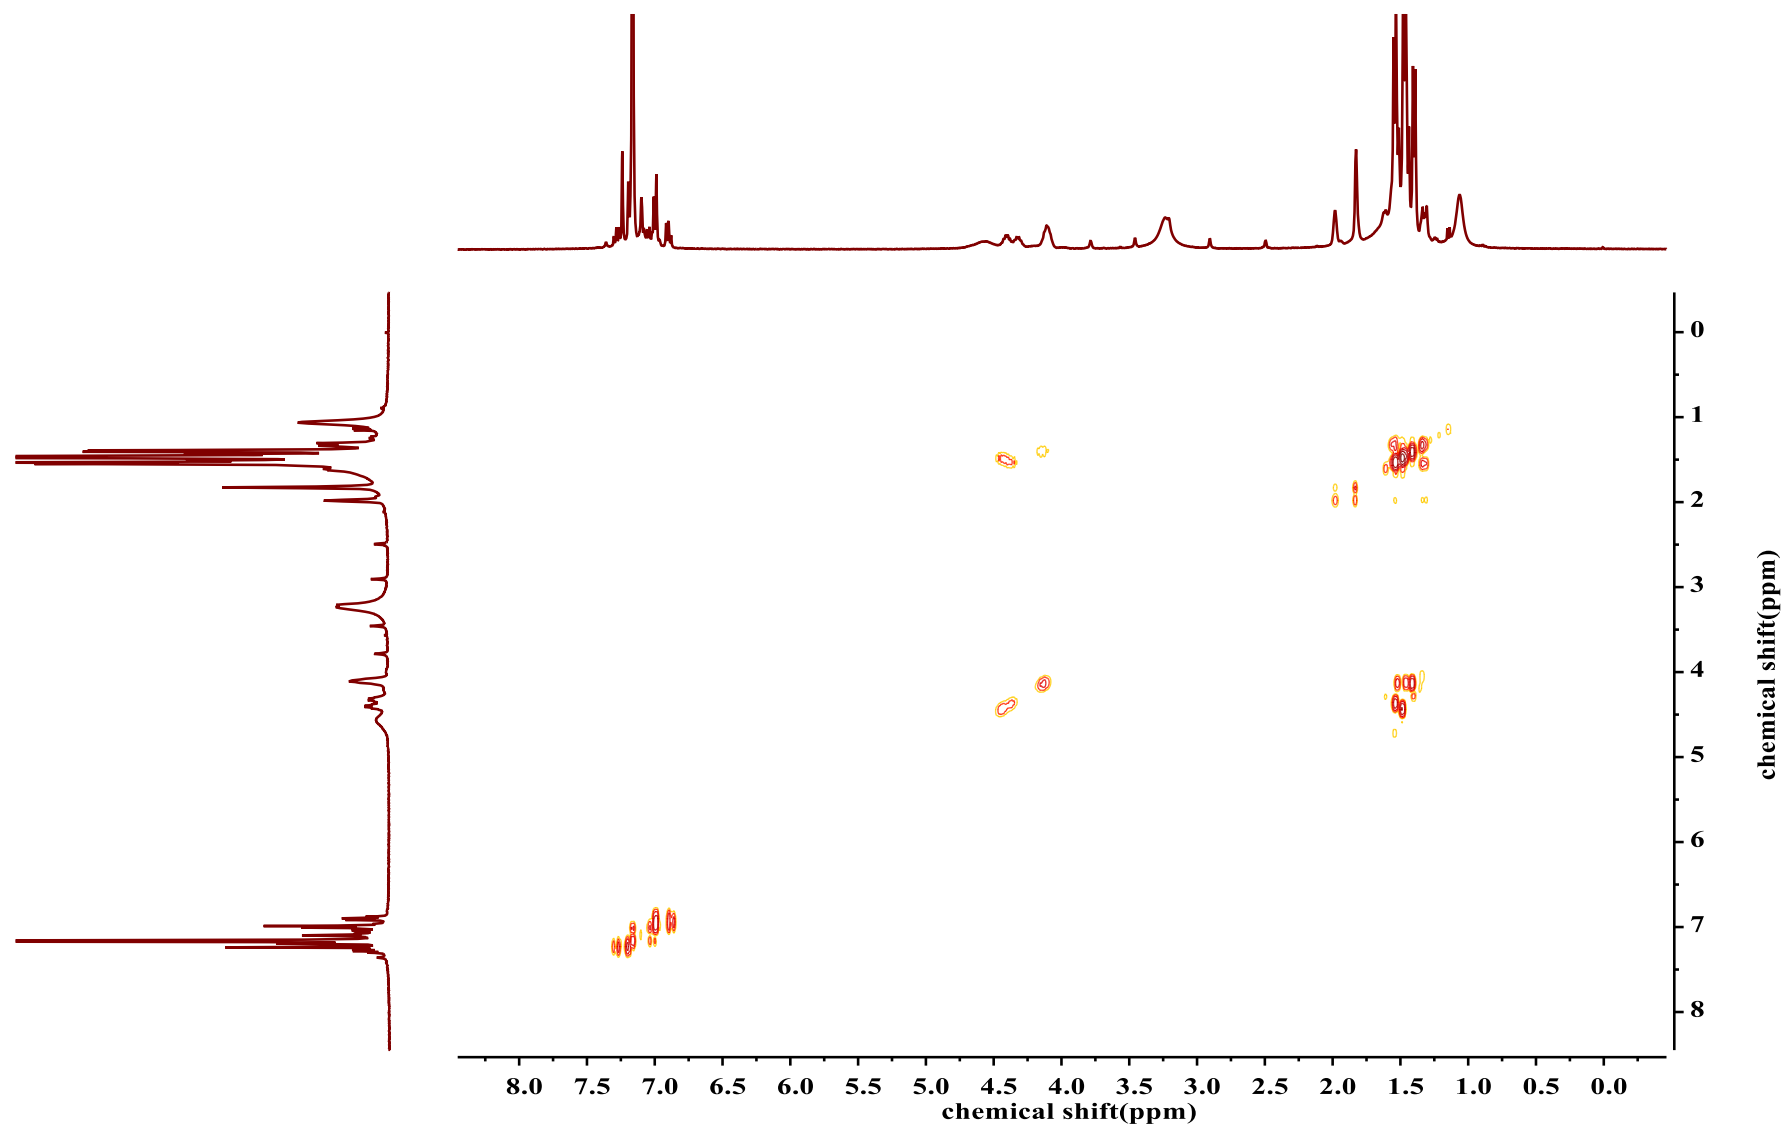

**Fig. S36** gCOSY spectra of complex **6** (400 MHz, C<sub>6</sub>D<sub>6</sub>, 25 °C).

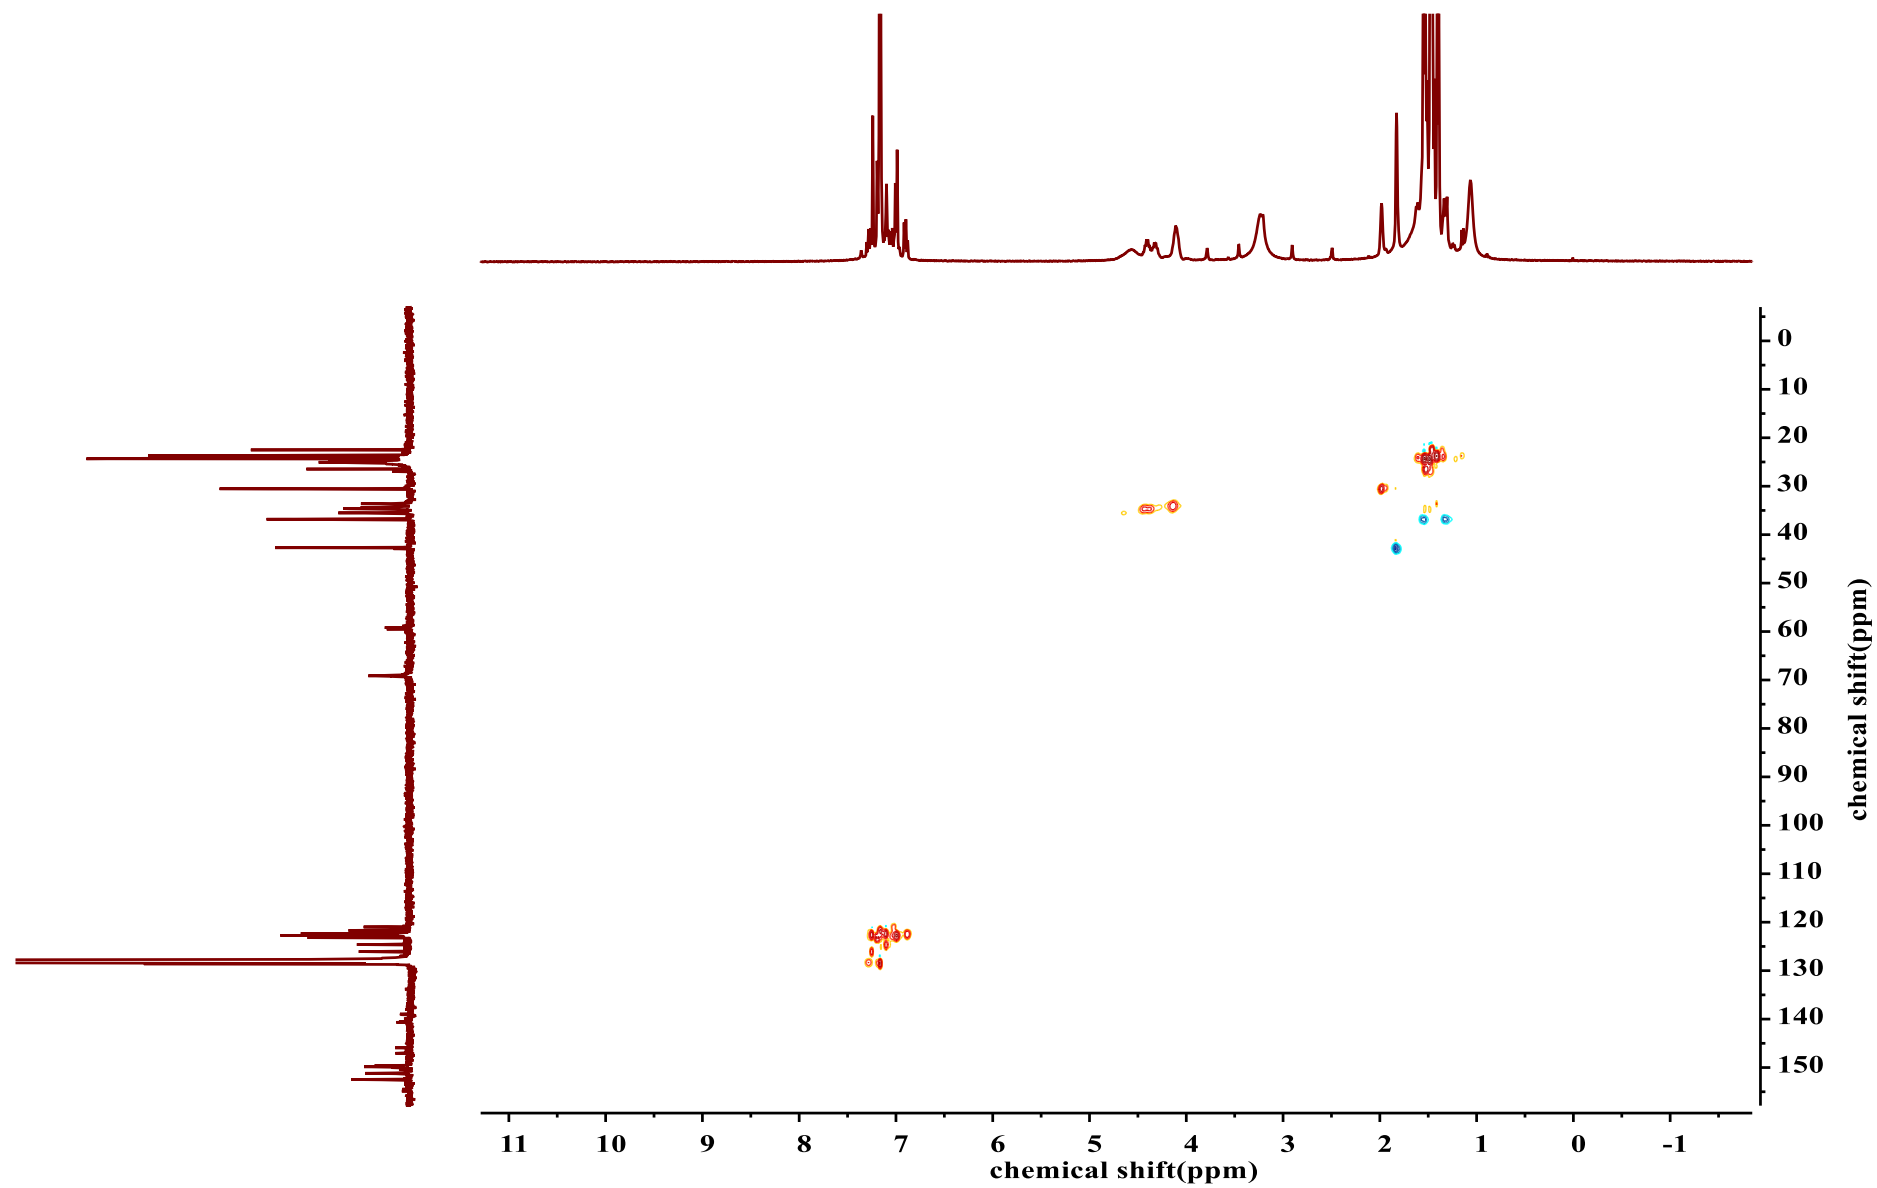

**Fig. S37** gHSQC spectra of complex **6** (400 MHz,  $\text{C}_6\text{D}_6$ , 25  $^\circ\text{C}$ ).

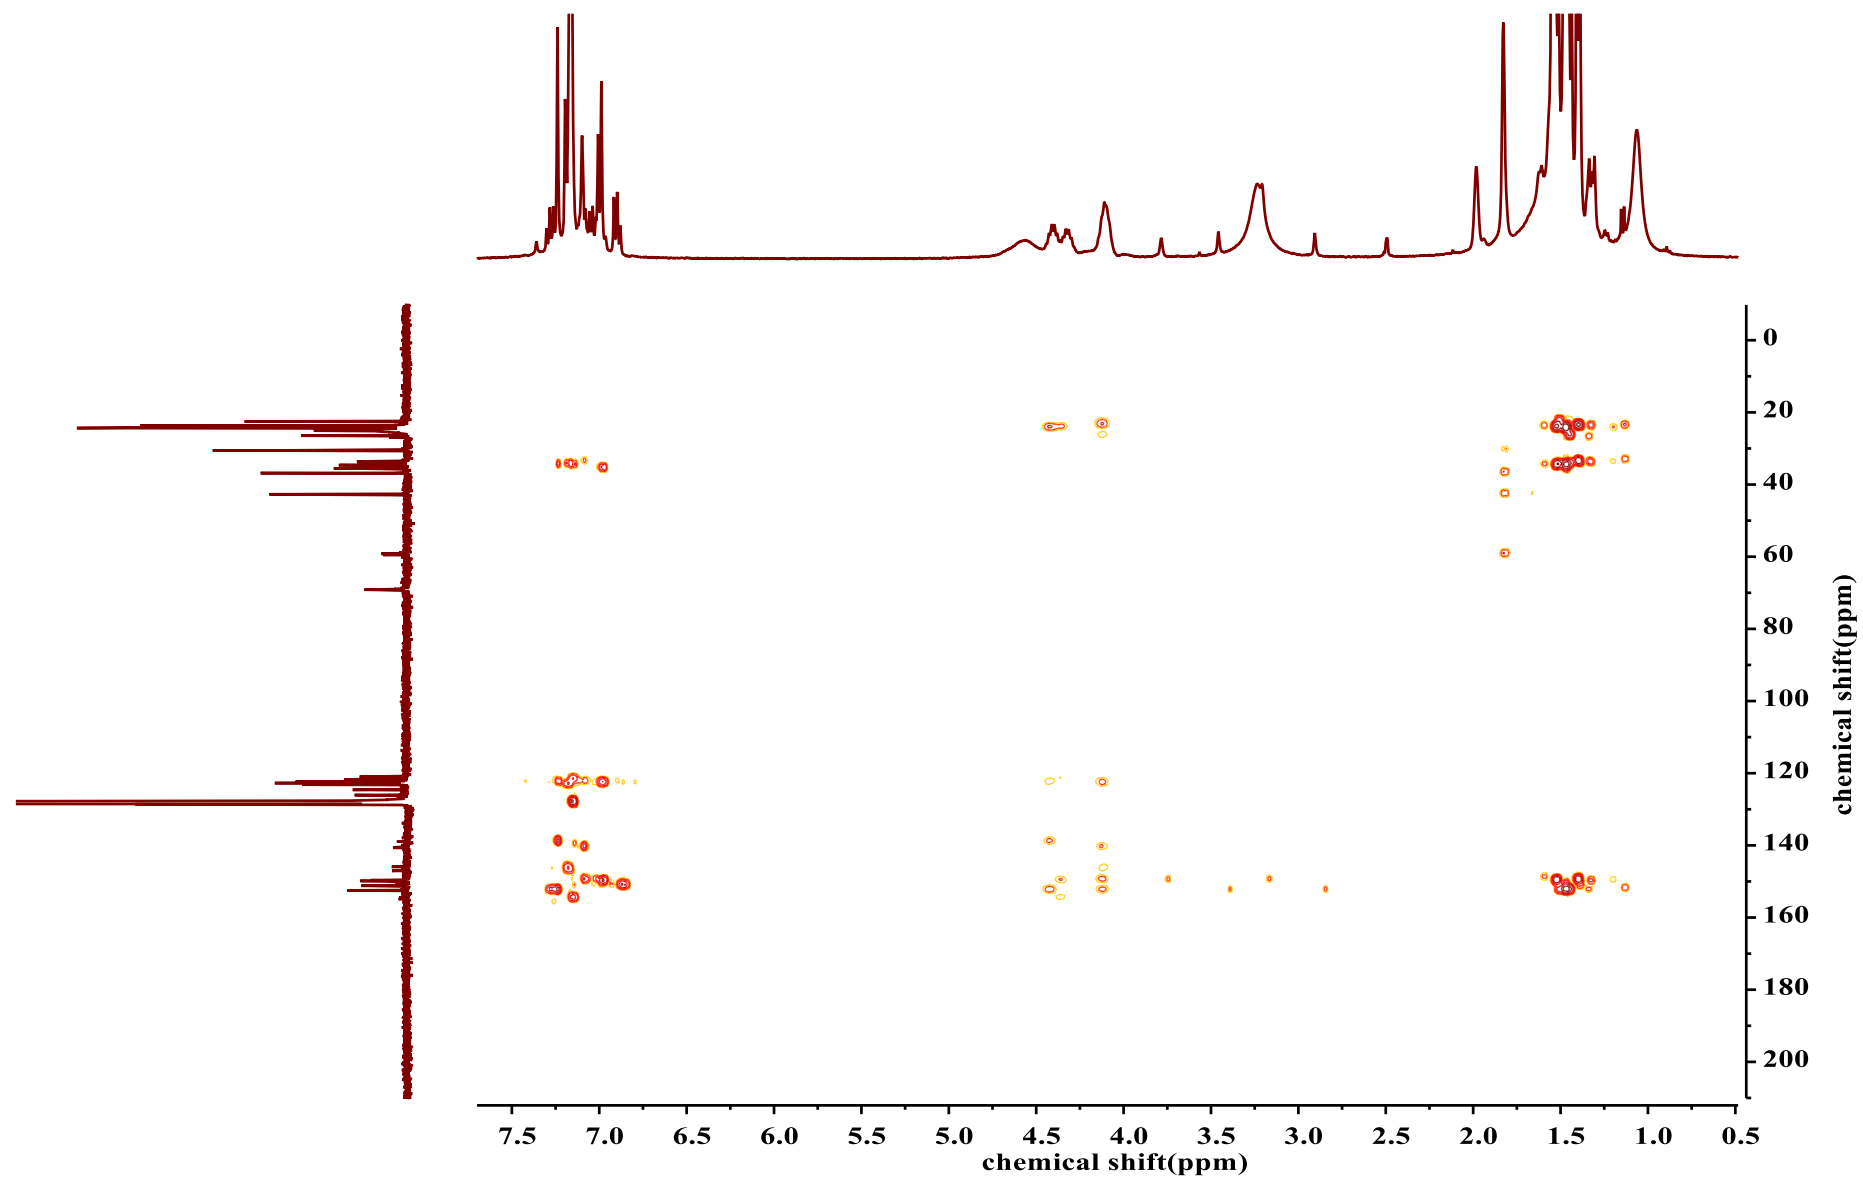

**Fig. S38** gHMBC spectra of complex **6** (400 MHz,  $\text{C}_6\text{D}_6$ , 25  $^\circ\text{C}$ ).

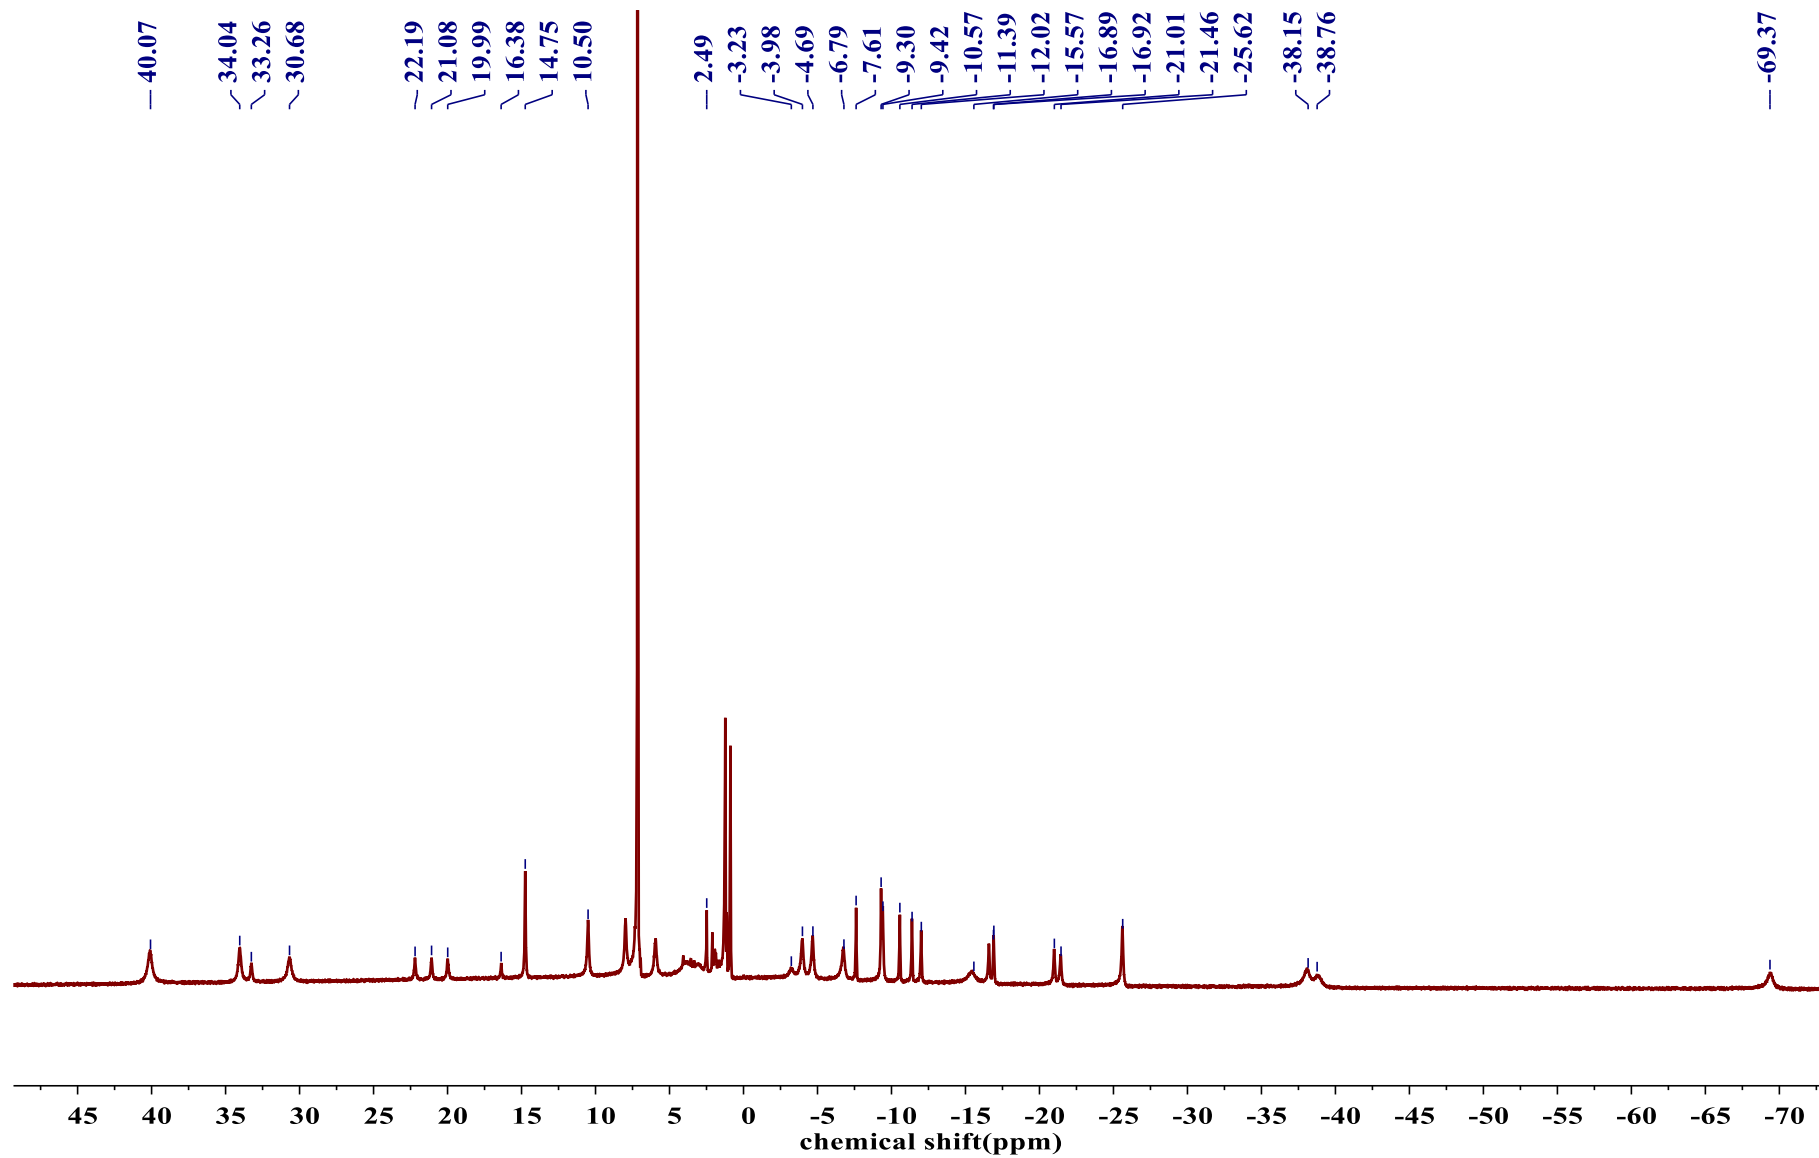

**Fig. S39**  $^1\text{H}$  NMR spectrum of complex 7 (400 MHz,  $\text{C}_6\text{D}_6$ , 25  $^\circ\text{C}$ ).

### **Formation of AdPh and AdH in the reaction of complex 4 with 10 equiv. of AdNC**

$d_5$ -Phenyladamantane (AdC<sub>6</sub>D<sub>5</sub>) and adamantane (AdH): To a C<sub>6</sub>D<sub>6</sub> solution (1 mL) of complex **4** (71.4 mg, 0.03mmol) was added a C<sub>6</sub>D<sub>6</sub> solution (1 mL) of AdNC (48.4 mg, 0.3 mmol) at room temperature. The reaction mixture was stirred for 24 h at room temperature, and then recorded by <sup>1</sup>H NMR spectroscopy (Fig. S40). The volatiles of the reaction solution were removed under vacuum, and the residue was divided into two parts. One was extracted with C<sub>6</sub>H<sub>6</sub> and recorded by <sup>2</sup>H NMR spectroscopy (Fig. S41), the other part was washed with hexane (1 mL × 3). The hexane wash was passed through silica gel and analyzed by GC-MS, which indicated the formation of  $d_5$ -Phenyladamantane(Ad-C<sub>6</sub>D<sub>5</sub>) and adamantane AdH (Fig. S42).

Phenyladamantane (AdPh) and AdH: To a benzene solution (1 mL) of complex **4** (71.4 mg, 0.03mmol) was added a benzene solution (1 mL) of AdNC (48.4 mg, 0.3 mmol) at room temperature. The reaction mixture was stirred for 24 h at room temperature, and then the solvent was removed under vacuum. The residue was washed with hexane (1 mL × 3). The hexane wash was passed through silica gel and analyzed by GC-MS, which indicated the formation of phenyladamantane (AdPh) and adamantane (AdH) (Fig. S43).

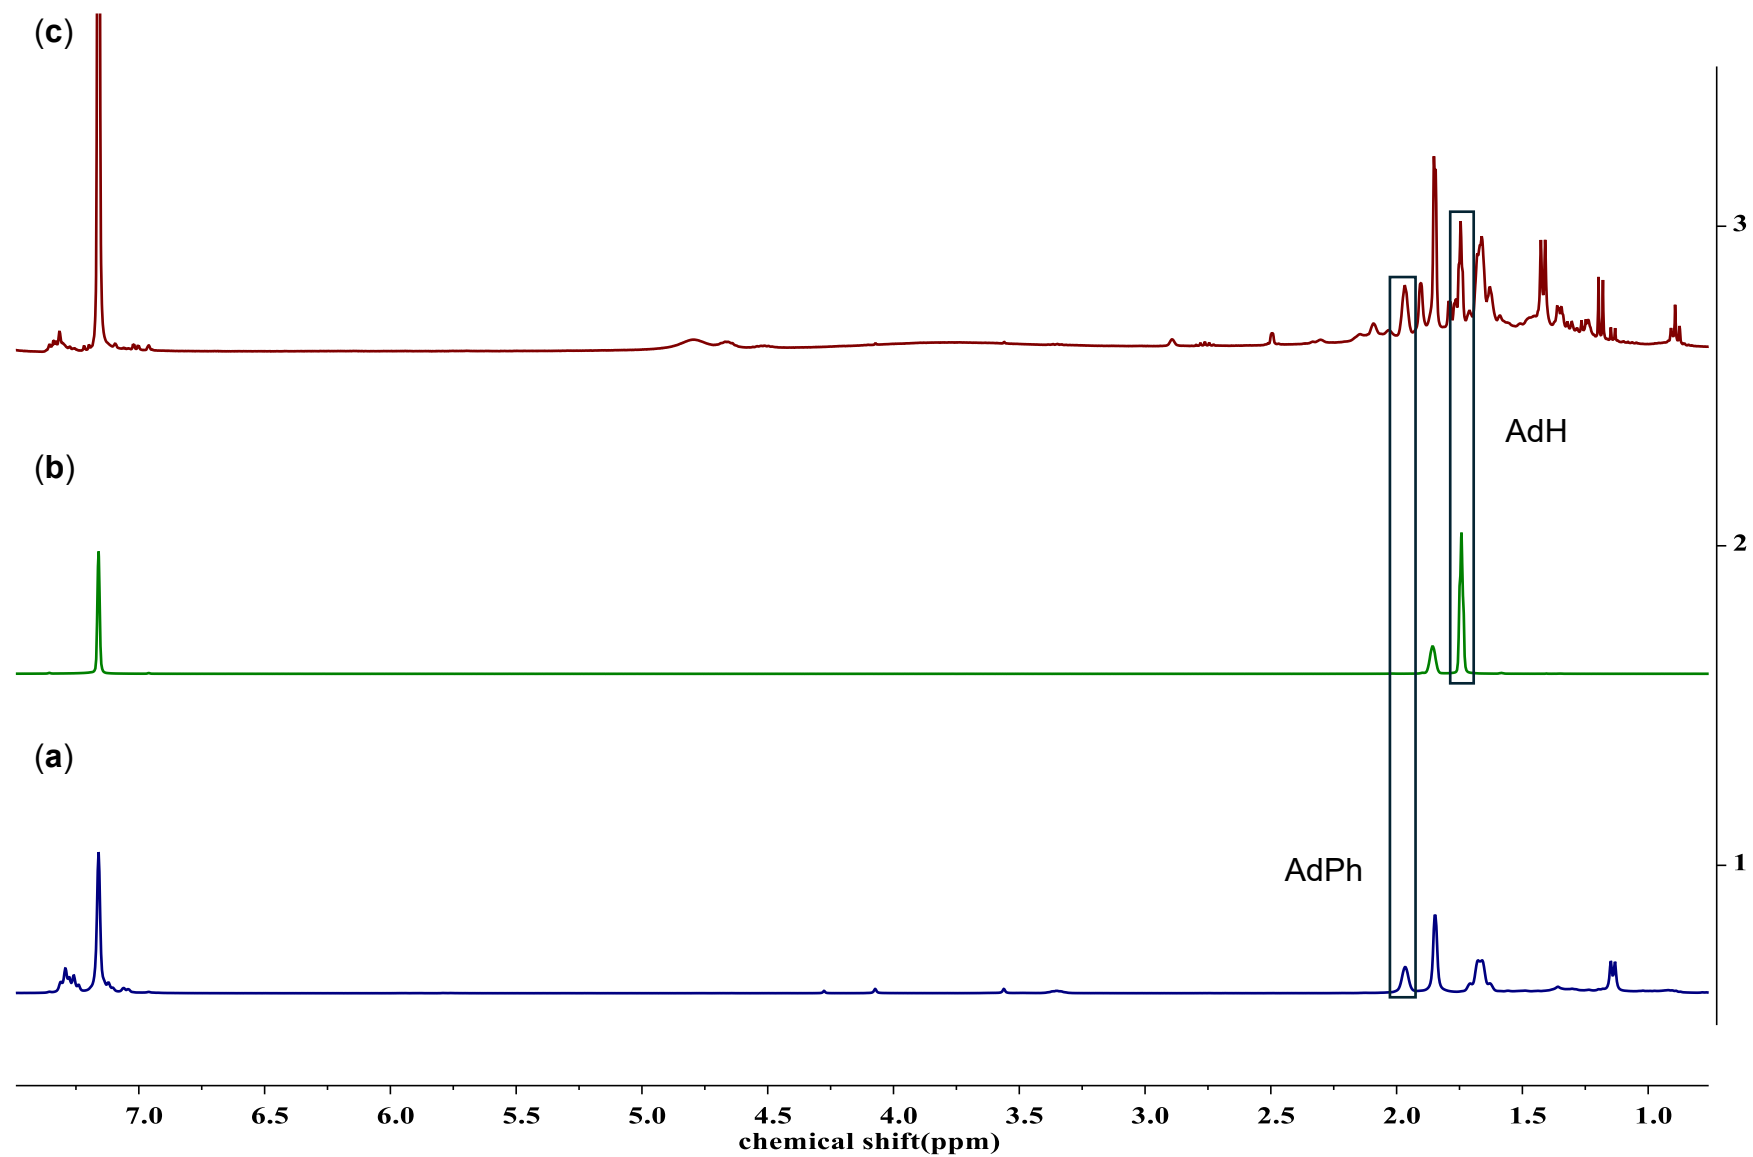

**Fig. S40** <sup>1</sup>H NMR spectra of (a) AdPh, (b) AdH, and (c) the reaction of complex **4** with 10 equiv. of AdNC in C<sub>6</sub>D<sub>6</sub> after 24 h (400 MHz, C<sub>6</sub>D<sub>6</sub>, 25 °C).

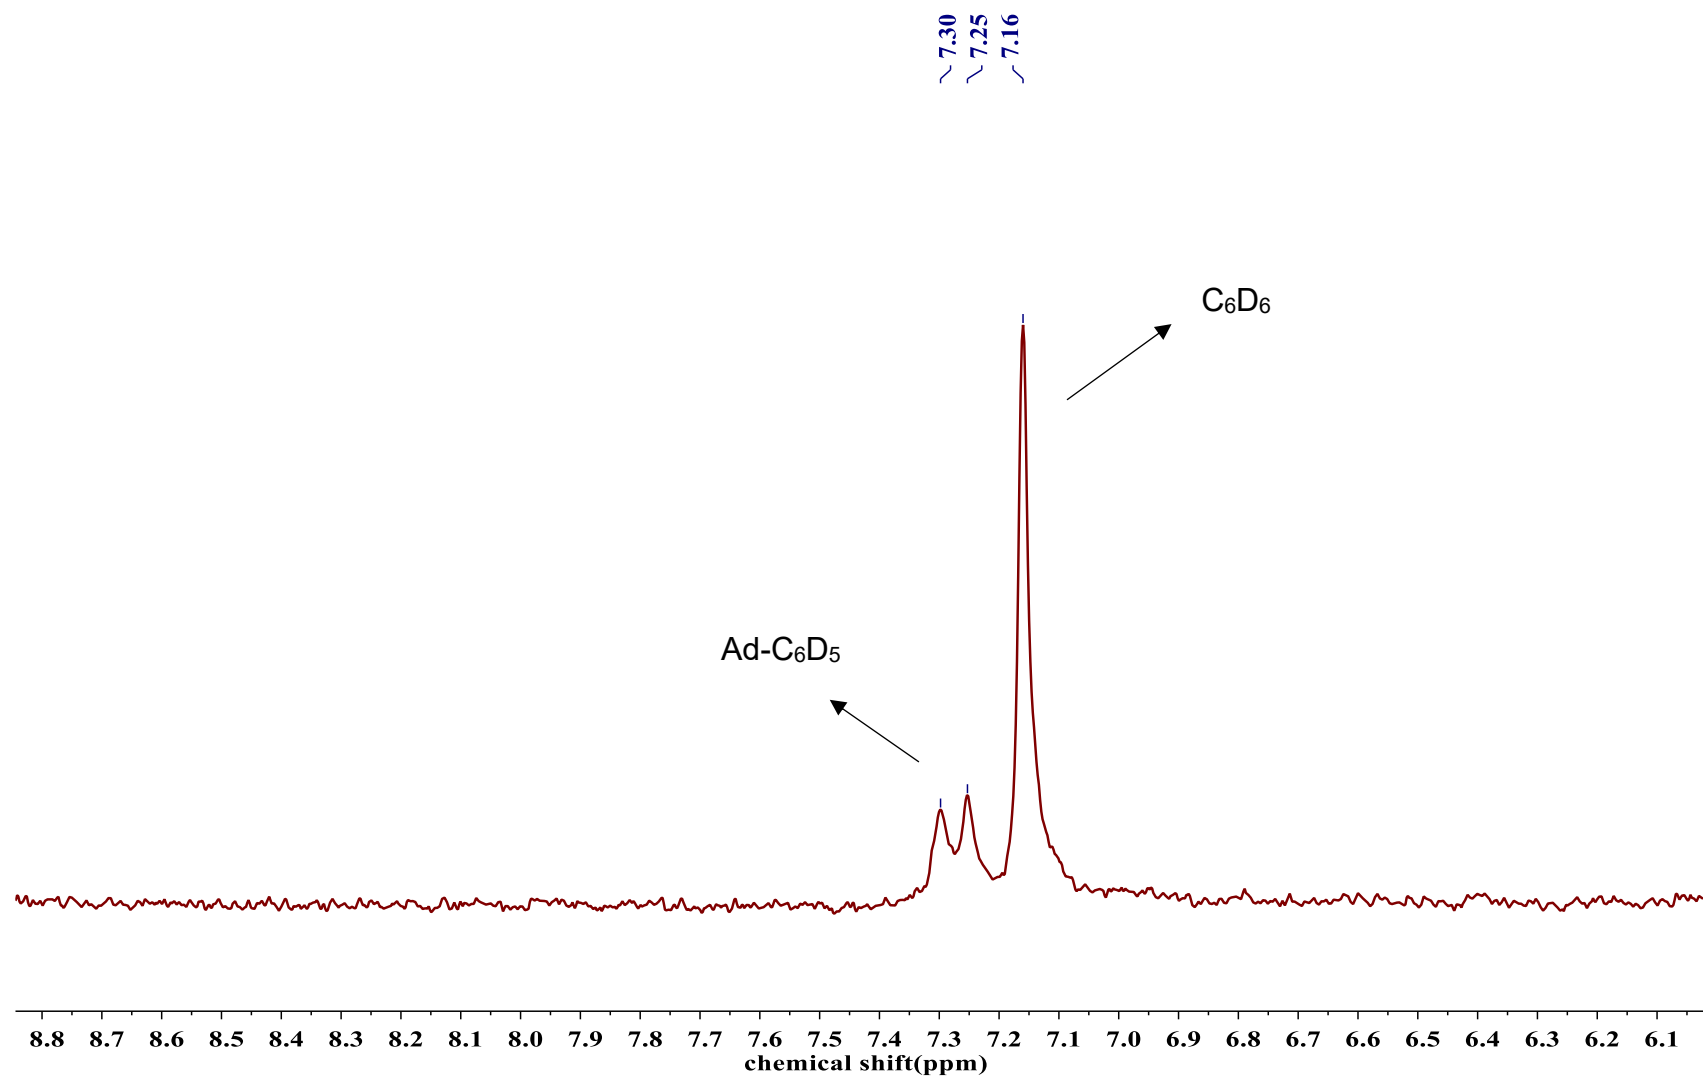

**Fig. S41**  $^2\text{H}$  NMR spectra of the hexane wash from the reaction of complex **4** with 10 equiv. of AdNC in  $\text{C}_6\text{D}_6$  (60 MHz,  $\text{C}_6\text{H}_6$ , 25 °C).  $\text{C}_6\text{D}_6$  as the reference.

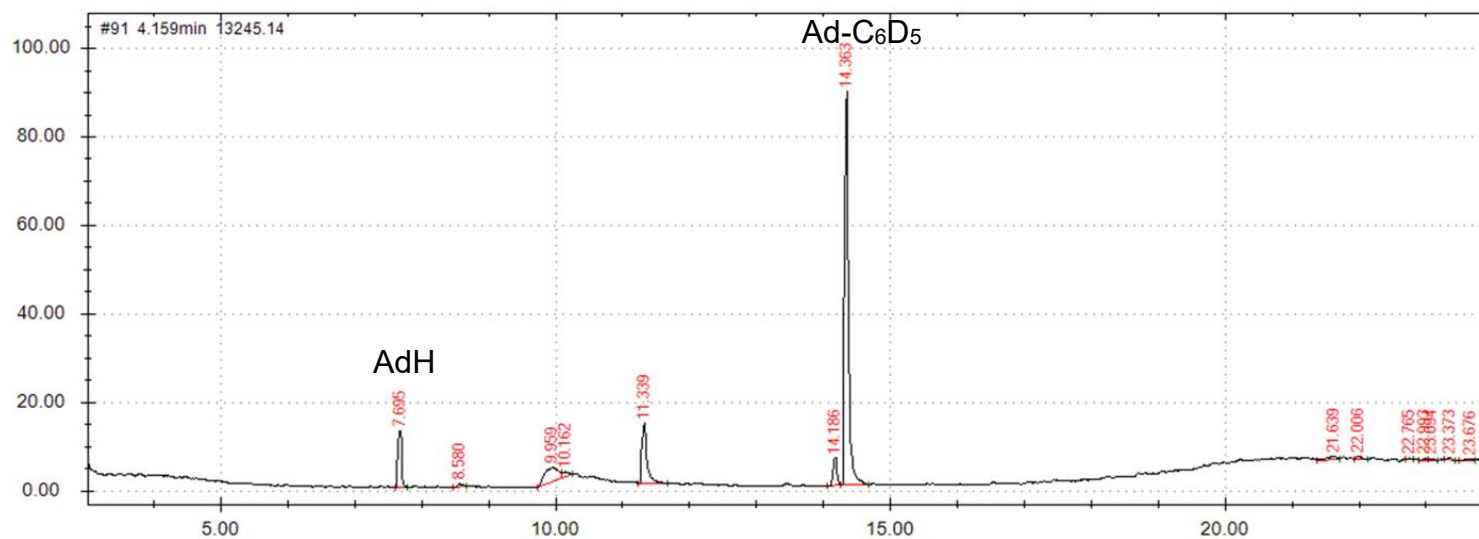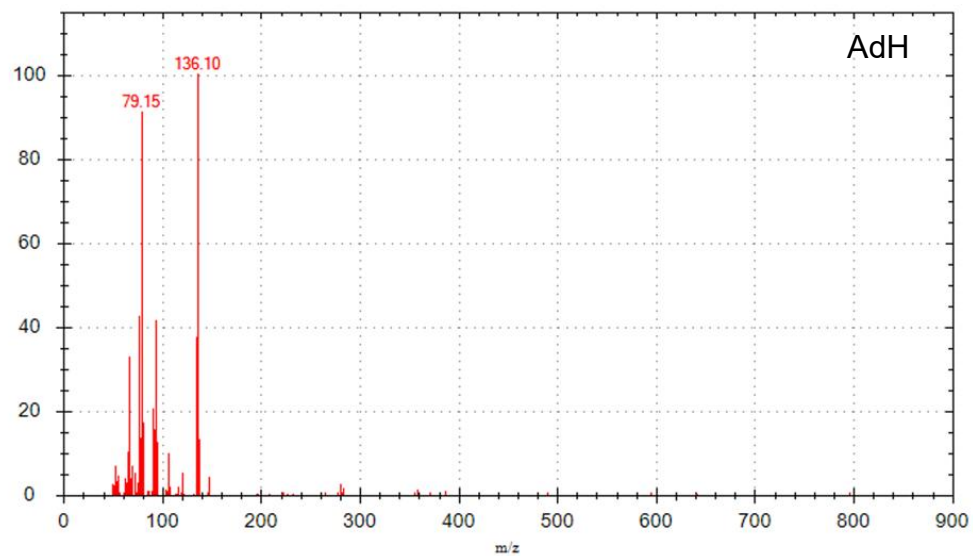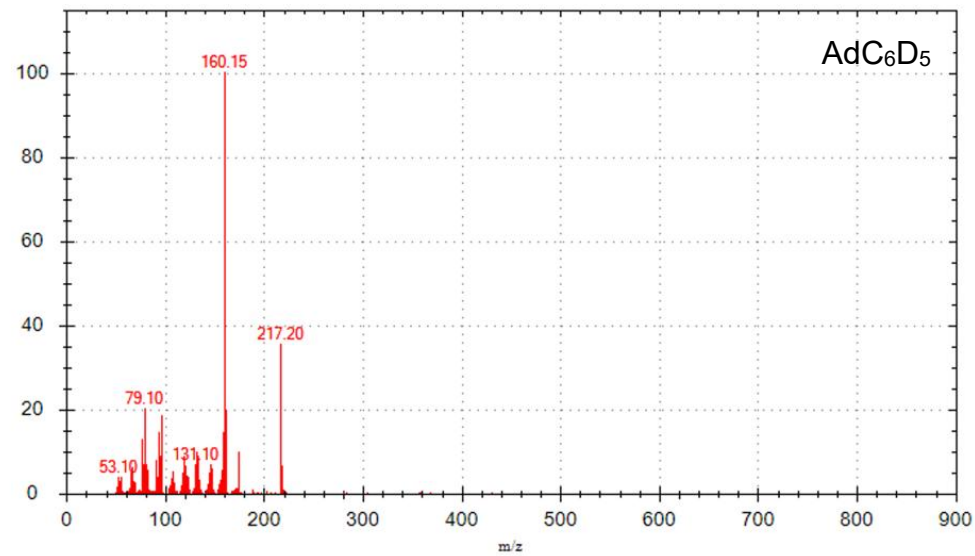

**Fig. S42** GC-MS analysis of the hexane wash from the reaction of complex **4** with 10 equiv. of AdNC in C<sub>6</sub>D<sub>6</sub>.

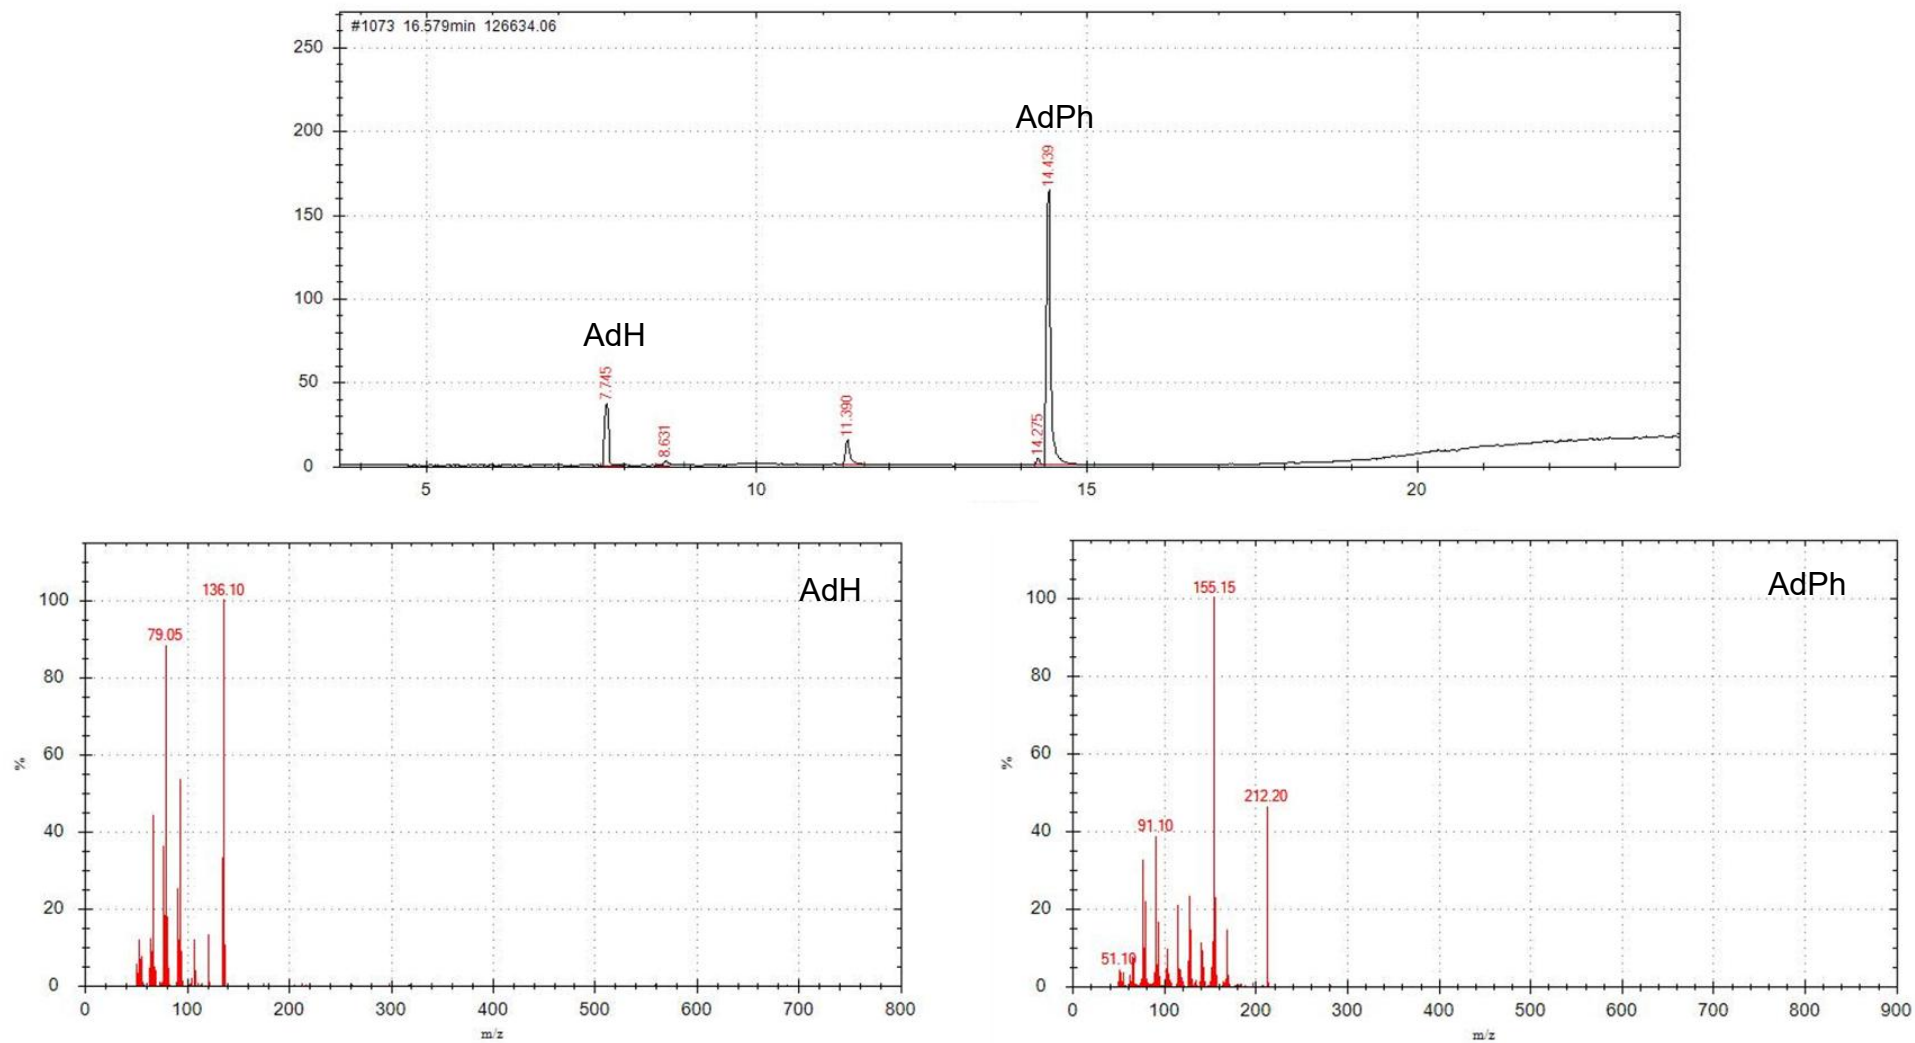

**Fig. S43** GC-MS analysis of the hexane wash from the reaction of Complex **4** with 10 equiv. of AdNC in C<sub>6</sub>H<sub>6</sub>.

## Magnetic measurements

Magnetic measurements were carried out using a Quantum Design MPMS3 SQUID magnetometer. Crystalline samples were handled and loaded into quartz tubes inside a glovebox under an inert atmosphere. A measured amount of eicosane was added to immobilize the crystallites, prevent sample torquing, and ensure good thermal contact between the sample and the temperature bath. The quartz tubes were subsequently sealed with silicone stoppers.

Direct-current (dc) magnetic susceptibility measurements were performed in the temperature range of 1.9–300 K under an applied magnetic field of 1000 Oe (0.1 T). All magnetic data were corrected for diamagnetic contributions arising from both the sample and the eicosane, estimated using Pascal's constants. The diamagnetic correction for the sample was calculated to be  $\chi_{\text{Di}} = -1.38 \times 10^{-3} \text{ cm}^3 \text{ mol}^{-1}$ , while that for eicosane was taken as  $-2.43 \times 10^{-4} \text{ cm}^3 \text{ mol}^{-1}$ .

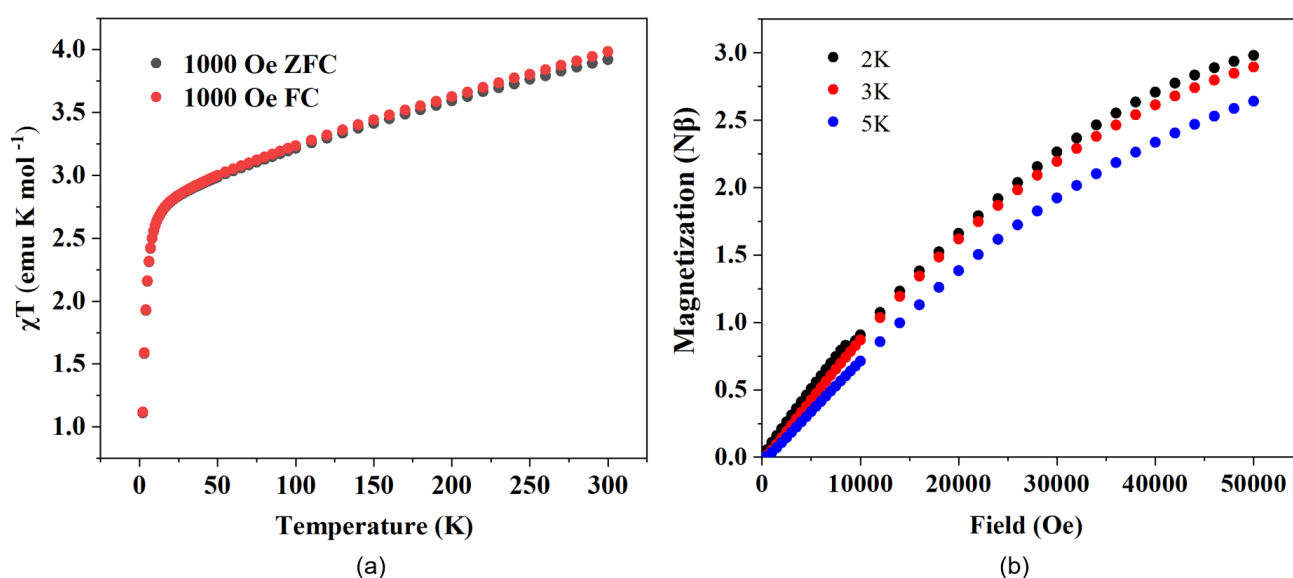

**Fig. S44** (a) Field-cooled (FC) and zero-field-cooled (ZFC)  $\chi T$  versus  $T$  curves for complex **7**, which almost completely overlap, indicating the absence of magnetic hysteresis or long-range magnetic ordering. (b) Field dependence of the magnetization,  $M(H)$ , measured at selected temperatures for complex **7**.

## UV/vis/NIR spectra

UV-Vis-NIR spectra were collected on solutions of complex **2**, **3**, **4**, **6**, and **7** in toluene.

Spectral fits in the UV/vis region of the electronic absorption spectra of complex **7** were performed using the peak analysis module in Origin. Gaussian functions were used for the deconvolution analysis of the observed features. Fits were conducted in units of molar absorptivity ( $M^{-1} cm^{-1}$ ) and energy ( $cm^{-1}$ ). A table of the optimized Gaussian parameters is provided below.

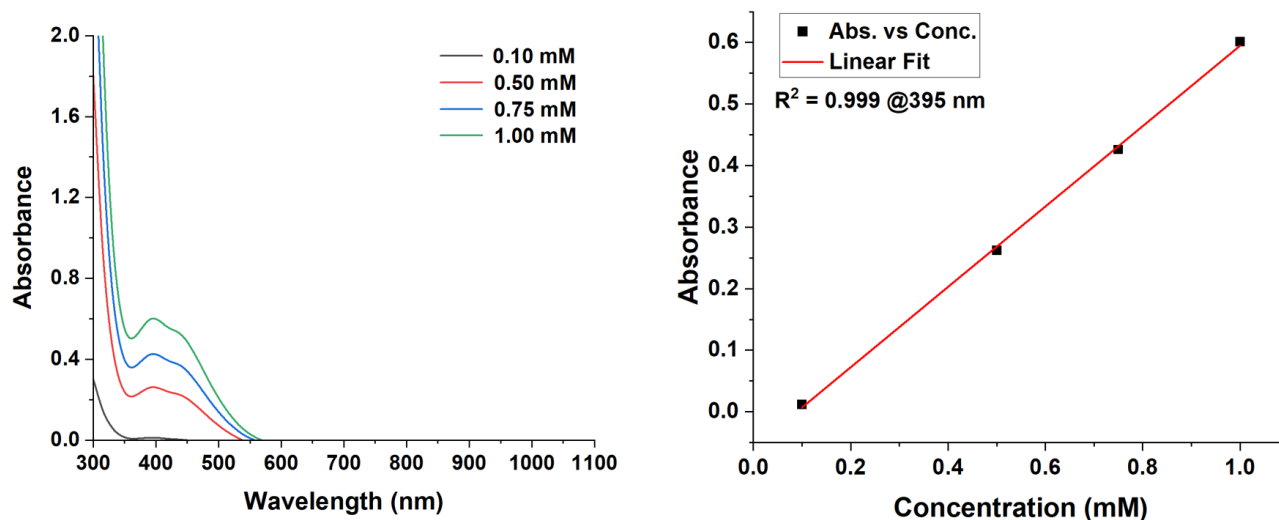

Fig. S45 UV/Vis/NIR spectra of complex **2** in toluene.

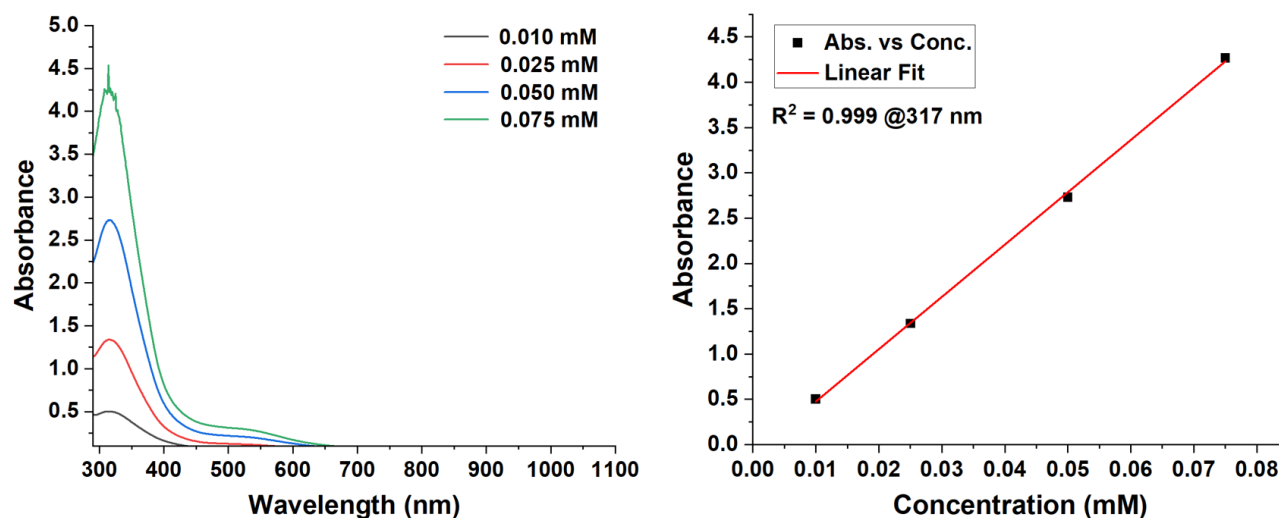

Fig. S46 UV/Vis/NIR spectra of complex **3** in toluene.

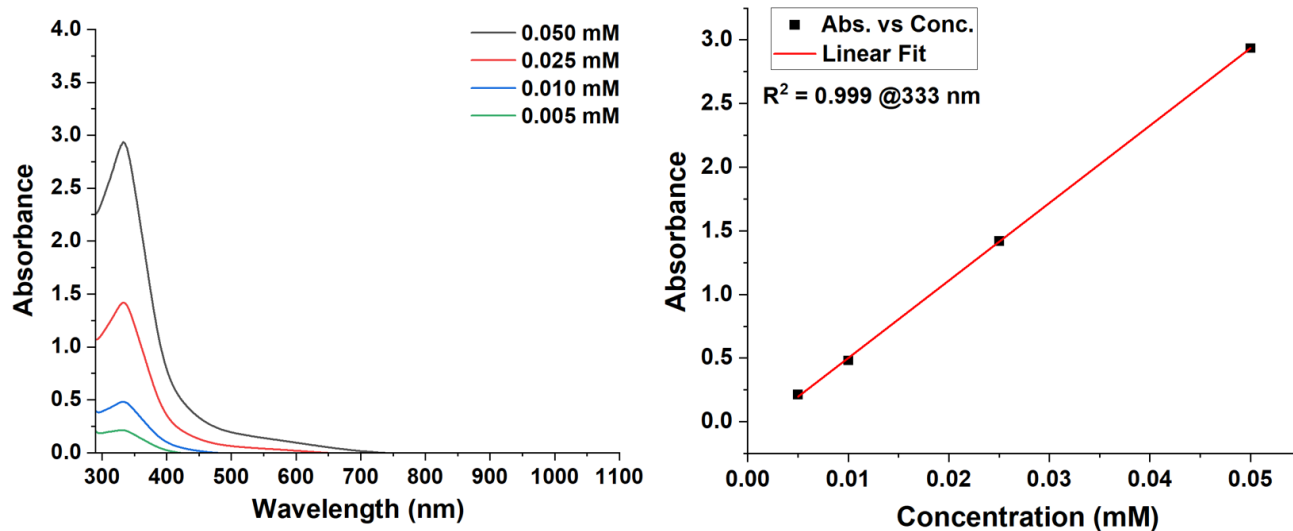

Fig. S47 UV/Vis/NIR spectra of complex 4 in toluene.

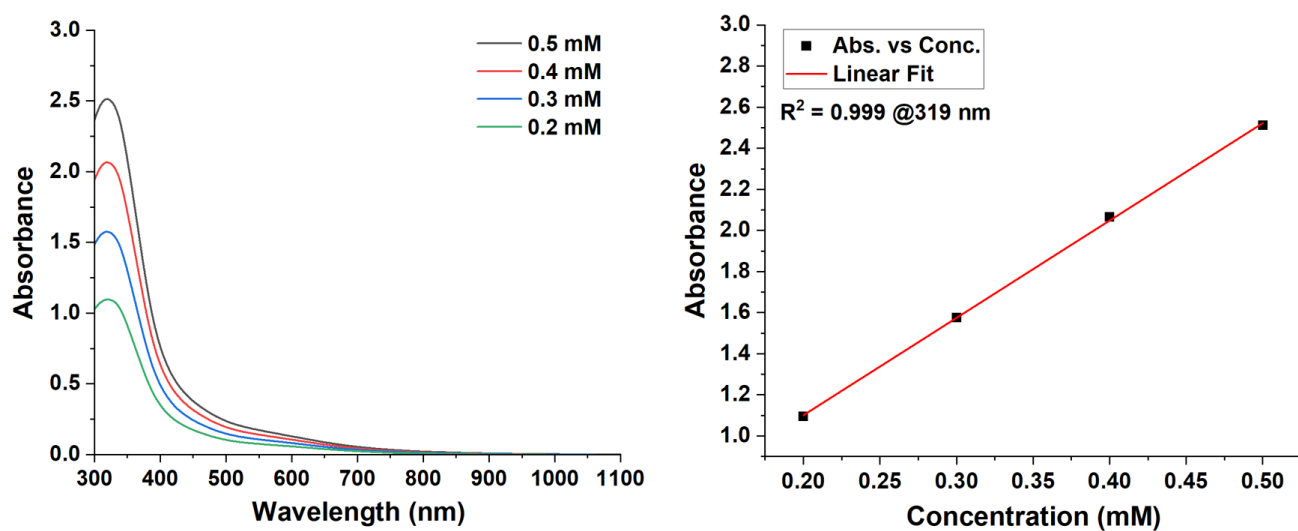

Fig. S48 UV/Vis/NIR spectra of complex 6 in toluene.

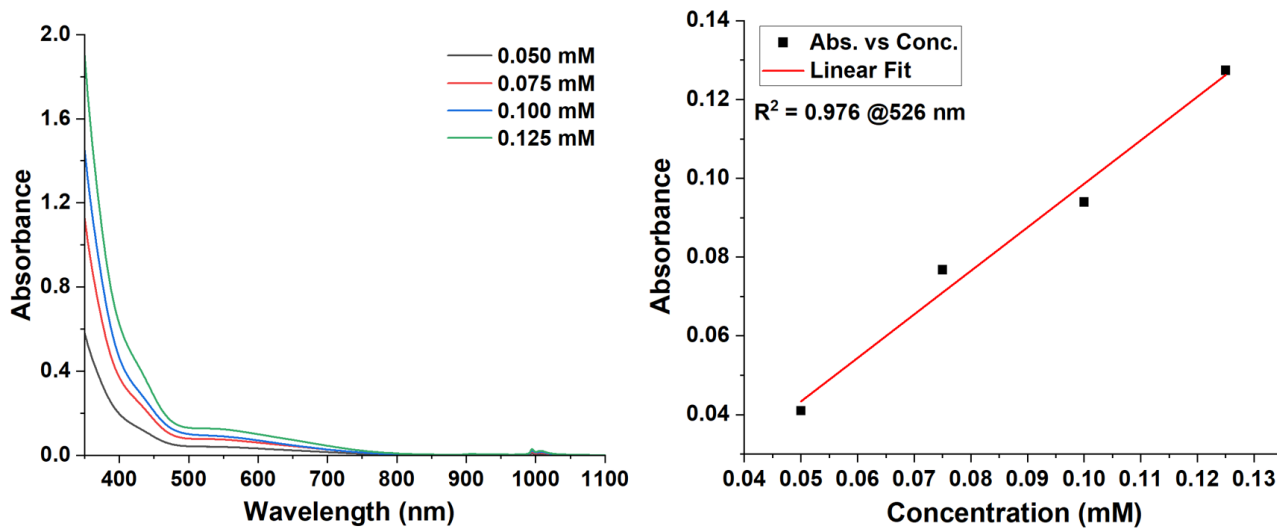

Fig. S49 UV/Vis/NIR spectra of complex 7 in toluene.

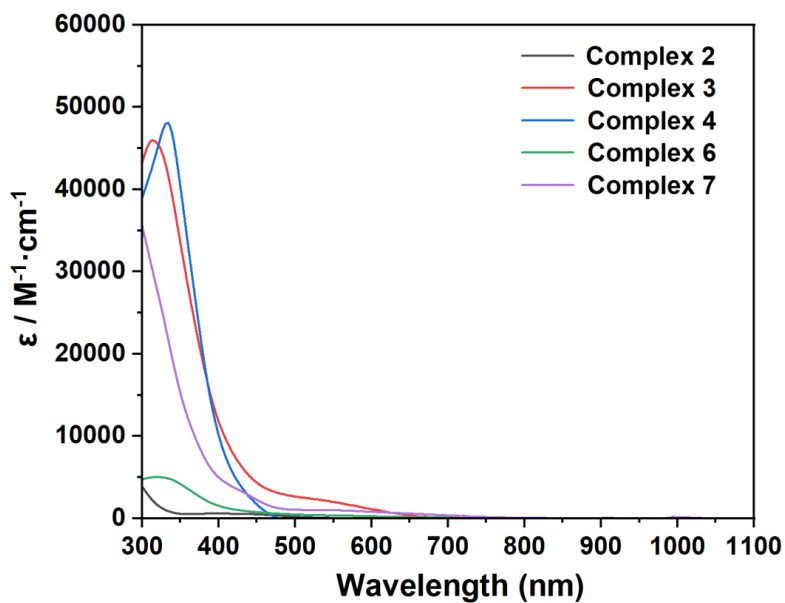

Fig. S50 Co-plotted UV/Vis/NIR spectra of complexes 2, 3, 4, 6 and 7 in toluene.

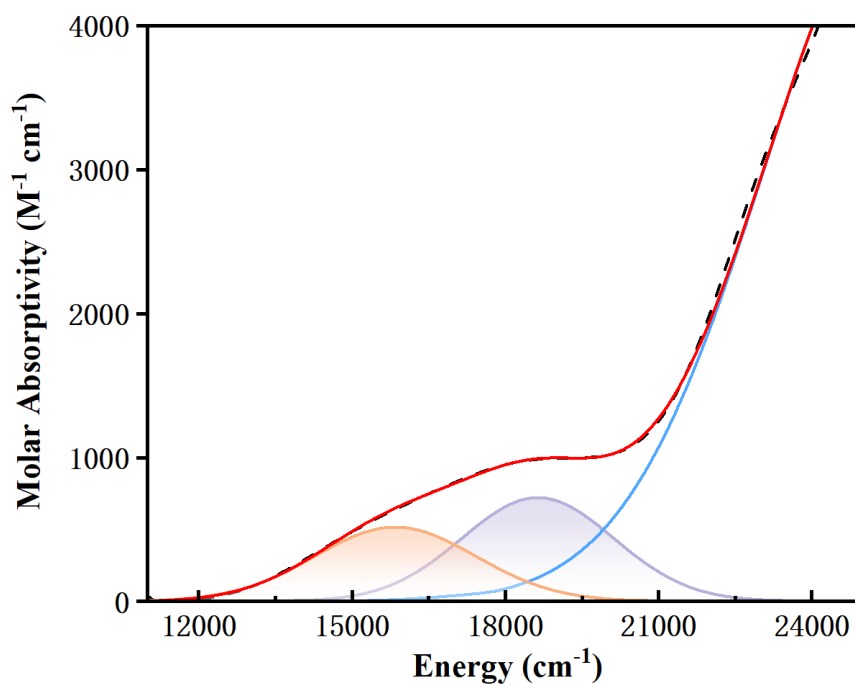

**Fig. S51** Gaussian fit for complex **7** in toluene at 27 °C. The orange, purple, and blue lines represent the individual Gaussian peaks which are added together in the overall fit (red line).

**Table S2** Fit parameters electronic absorption spectra of complex **7**.

| Temp (°C) | $\epsilon$ ( $M^{-1} \text{ cm}^{-1}$ ) | $\nu_{\text{max}}$ ( $\text{cm}^{-1}$ ) | $\Delta\nu_{1/2}$ ( $\text{cm}^{-1}$ ) | $\Gamma$ |
|-----------|-----------------------------------------|-----------------------------------------|----------------------------------------|----------|
| 27 °C     | 722.9                                   | 18634                                   | 3500                                   | 0.47     |
| 27 °C     | 517.1                                   | 15846                                   | 3709                                   | 0.39     |

## Computational details

DFT calculations were carried out by employing hybrid functional (B3PW91)<sup>12</sup> along with small core pseudopotential Stuttgart basis set<sup>13,14</sup> for ytterbium, phosphorus and silicon atoms (polarization functions<sup>15</sup> were added for phosphorus and silicon atoms), and Pople basis set<sup>16–18</sup> (6-31G\*\*) for the rest of the atoms. Dispersion corrections were included in our calculations by employing D3 version of Grimme's dispersion with Becke-Johnson damping<sup>19</sup>. Frequency calculations were performed to locate minima for the optimized structures. All the calculations were performed using Gaussian 09 suite of programs.<sup>20</sup> Natural bond order analysis was carried out by employing NBO 6.0 version, as implemented in gaussian program.<sup>21</sup> AIM analysis was performed using Multiwfn software.<sup>22</sup> TDDFT was carried out to obtain the UV-Visible spectrum of complex **7** by computing 200 states.

**Table S3** Comparison of bond distances (Å) between selected atoms in DFT optimized and X-ray structure for complex **3**.

| Atom labels | DFT           |            | X-ray |
|-------------|---------------|------------|-------|
|             | No dispersion | dispersion |       |
| Yb3-P1      | 3.04          | 2.94       | 2.99  |
| Yb1-P1      | 3.02          | 2.92       | 2.94  |
| Yb2-P1      | 2.97          | 2.88       | 2.95  |
| Yb4-P1      | 2.99          | 2.87       | 2.94  |
| Yb1-P2      | 3.01          | 2.90       | 2.93  |
| Yb2-P2      | 2.98          | 2.87       | 2.92  |
| Yb3-P4      | 3.04          | 2.89       | 2.95  |
| Yb4-P4      | 2.99          | 2.86       | 2.92  |
| Yb3-P3      | 3.00          | 2.87       | 2.94  |
| Yb2-P3      | 2.94          | 2.83       | 2.90  |
| Yb1-P5      | 2.97          | 2.92       | 2.94  |
| Yb4-P5      | 2.97          | 2.85       | 2.92  |
| Yb3-O2      | 2.50          | 2.44       | 2.45  |
| Yb1-O4      | 2.50          | 2.44       | 2.46  |
| Yb2-O1      | 2.48          | 2.40       | 2.42  |
| Yb4-O3      | 2.48          | 2.42       | 2.44  |
| Yb1-C5      | 2.62          | 2.58       | 2.61  |
| Yb4-C5      | 2.62          | 2.56       | 2.59  |

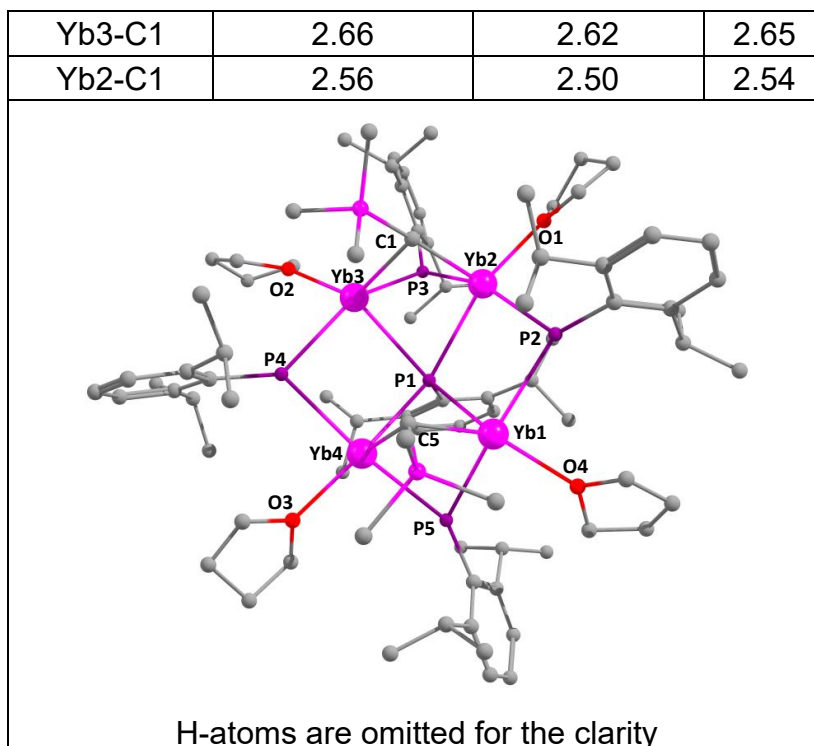

**Table S4** Computed natural charges for selected atoms in complex **3**.

| Atom labels | Natural charges |            |
|-------------|-----------------|------------|
|             | No dispersion   | dispersion |
| Yb3         | 1.22352         | 1.00080    |
| Yb1         | 1.17483         | 1.02860    |
| Yb2         | 1.07593         | 0.92036    |
| Yb4         | 1.16898         | 1.01752    |
| P1          | -0.71955        | -0.51637   |
| P2          | -0.26898        | -0.18763   |
| P4          | -0.28365        | -0.20384   |
| P3          | -0.24846        | -0.14636   |
| P5          | -0.26728        | -0.18341   |
| O2          | -0.63811        | -0.62721   |
| O4          | -0.63812        | -0.62781   |
| O1          | -0.63381        | -0.62895   |
| O3          | -0.63950        | -0.63503   |
| C5          | -1.63170        | -1.60305   |
| C1          | -1.61859        | -1.58681   |

**Table S5** Computed Wiberg bond index between selected atoms in complex **3**.

| Atom labels | Wiberg bond index |            |
|-------------|-------------------|------------|
|             | No dispersion     | dispersion |
| Yb3-P1      | 0.3121            | 0.3590     |

|        |        |        |
|--------|--------|--------|
| Yb1-P1 | 0.2687 | 0.3312 |
| Yb2-P1 | 0.2993 | 0.3601 |
| Yb4-P1 | 0.1313 | 0.1534 |
| Yb1-P2 | 0.2085 | 0.2365 |
| Yb2-P2 | 0.3316 | 0.3656 |
| Yb3-P4 | 0.2807 | 0.3174 |
| Yb4-P4 | 0.3155 | 0.3194 |
| Yb3-P3 | 0.1330 | 0.1470 |
| Yb2-P3 | 0.2411 | 0.2523 |
| Yb1-P5 | 0.3611 | 0.3946 |
| Yb4-P5 | 0.3045 | 0.3454 |
| Yb3-O2 | 0.3433 | 0.3856 |
| Yb1-O4 | 0.1414 | 0.1517 |
| Yb2-O1 | 0.2808 | 0.3068 |
| Yb4-O3 | 0.3315 | 0.3876 |
| Yb1-C5 | 0.2866 | 0.3160 |
| Yb4-C5 | 0.3235 | 0.3798 |
| Yb3-C1 | 0.1339 | 0.1454 |
| Yb2-C1 | 0.2410 | 0.2490 |

Bonding orbitals between ytterbium and atoms in the first coordination sphere of metal in complex 3 (dispersion)

(1.69952) BD ( 1)Yb 3- P 1

( 9.10%) 0.3016\*Yb 1 s( 16.17%)p 0.00( 0.07%)d 5.17( 83.62%) f 0.01( 0.12%)g 0.00( 0.02%)

( 90.90%) 0.9534\* P 5 s( 38.75%)p 1.58( 61.23%)d 0.00( 0.02%)

(1.72628) BD ( 1)Yb 1- P 1

( 9.38%) 0.3062\*Yb 2 s( 15.62%)p 0.00( 0.05%)d 5.39( 84.19%) f 0.01( 0.12%)g 0.00( 0.02%)

( 90.62%) 0.9520\* P 5 s( 42.56%)p 1.35( 57.42%)d 0.00( 0.02%)

Bonding orbitals between ytterbium and atoms in the first coordination sphere of metal in complex 3 (no dispersion)

(1.75316) BD ( 1)Yb 3- P 1

( 7.25%) 0.2693\*Yb 1 s( 25.04%)p 0.01( 0.15%)d 2.98( 74.66%) f 0.01( 0.13%)g 0.00( 0.02%)

( 92.75%) 0.9631\* P 5 s( 38.73%)p 1.58( 61.25%)d 0.00( 0.02%)

(1.77783) BD ( 1)Yb 1- P 1

( 8.16%) 0.2857\*Yb 2 s( 23.68%)p 0.01( 0.12%)d 3.21( 76.05%) f 0.01( 0.13%)g 0.00( 0.02%)

( 91.84%) 0.9583\* P 5 s( 42.23%)p 1.37( 57.75%)d 0.00( 0.02%)

**Table S6** NBO Second order perturbation analysis for complex **3** (dispersion).

| Donor NBO                                                                                                                                                                                         | Acceptor NBO                                                                                       | E(2)<br>kcal/<br>mol |
|---------------------------------------------------------------------------------------------------------------------------------------------------------------------------------------------------|----------------------------------------------------------------------------------------------------|----------------------|
| (1.65103) LP ( 1) P 1<br>s( 1.58%)p62.12( 98.41%)d<br>0.01( 0.01%)                                                                                                                                | (0.12810) LV ( 3)Yb 3<br>s( 0.83%)p<br>0.11( 0.09%)d99.99( 98.99%)f<br>0.08( 0.06%)g 0.02( 0.01%)  | 6.10                 |
| (1.65103) LP ( 1) P 1<br>s( 1.58%)p62.12( 98.41%)d<br>0.01( 0.01%)                                                                                                                                | (0.10992) LV ( 4)Yb 3<br>s( 27.19%)p 0.01( 0.16%)d<br>2.67( 72.56%)f 0.00( 0.08%)g<br>0.00( 0.01%) | 8.89                 |
| (1.65103) LP ( 1) P 1<br>s( 1.58%)p62.12( 98.41%)d<br>0.01( 0.01%)                                                                                                                                | (0.12041) LV ( 3)Yb 1<br>s( 13.90%)p 0.01( 0.13%)d<br>6.18( 85.91%)f 0.00( 0.06%)g<br>0.00( 0.01%) | 6.99                 |
| (1.65103) LP ( 1) P 1<br>s( 1.58%)p62.12( 98.41%)d<br>0.01( 0.01%)                                                                                                                                | (0.23261) LV ( 2)Yb 2<br>s( 33.01%)p 0.00( 0.05%)d<br>2.02( 66.81%)f 0.00( 0.12%)g<br>0.00( 0.01%) | 8.07                 |
| (1.65103) LP ( 1) P 1<br>s( 1.58%)p62.12( 98.41%)d<br>0.01( 0.01%)                                                                                                                                | (0.12845) LV ( 4)Yb 2<br>s( 24.20%)p 0.00( 0.05%)d<br>3.12( 75.61%)f 0.01( 0.12%)g<br>0.00( 0.02%) | 4.71                 |
| (1.69952) BD ( 1)Yb 3- P 1<br>( 9.10%) 0.3016*Yb 3 s( 16.17%)p<br>0.00( 0.07%)d 5.17( 83.62%) f<br>0.01( 0.12%)g 0.00( 0.02%)<br>( 90.90%) 0.9534* P 1 s( 38.75%)p<br>1.58( 61.23%)d 0.00( 0.02%) | (0.36958) LV ( 1)Yb 2<br>s( 11.98%)p 0.00( 0.01%)d<br>7.34( 87.93%)f 0.01( 0.07%)g<br>0.00( 0.01%) | 10.39                |
| (1.69952) BD ( 1)Yb 3- P 1<br>( 9.10%) 0.3016*Yb 3 s( 16.17%)p<br>0.00( 0.07%)d 5.17( 83.62%) f<br>0.01( 0.12%)g 0.00( 0.02%)<br>( 90.90%) 0.9534* P 1 s( 38.75%)p<br>1.58( 61.23%)d 0.00( 0.02%) | (0.23261) LV ( 2)Yb 2<br>s( 33.01%)p 0.00( 0.05%)d<br>2.02( 66.81%)f 0.00( 0.12%)g<br>0.00( 0.01%) | 75.81                |
| (1.69952) BD ( 1)Yb 3- P 1<br>( 9.10%) 0.3016*Yb 3 s( 16.17%)p<br>0.00( 0.07%)d 5.17( 83.62%) f<br>0.01( 0.12%)g 0.00( 0.02%)<br>( 90.90%) 0.9534* P 1 s( 38.75%)p<br>1.58( 61.23%)d 0.00( 0.02%) | (0.19211) LV ( 3)Yb 2<br>s( 11.53%)p 0.00( 0.05%)d<br>7.66( 88.31%)f 0.01( 0.10%)g<br>0.00( 0.01%) | 12.88                |

|                                                                                                                                                                                                   |                                                                                                    |       |
|---------------------------------------------------------------------------------------------------------------------------------------------------------------------------------------------------|----------------------------------------------------------------------------------------------------|-------|
| (1.69952) BD ( 1)Yb 3- P 1<br>( 9.10%) 0.3016*Yb 3 s( 16.17%)p<br>0.00( 0.07%)d 5.17( 83.62%) f<br>0.01( 0.12%)g 0.00( 0.02%)<br>( 90.90%) 0.9534* P 1 s( 38.75%)p<br>1.58( 61.23%)d 0.00( 0.02%) | (0.11786) LV ( 5)Yb 2<br>s( 14.24%)p 0.01( 0.12%)d<br>6.00( 85.50%)f 0.01( 0.13%)g<br>0.00( 0.01%) | 5.09  |
| (1.72628) BD ( 1)Yb 1- P 1<br>( 9.38%) 0.3062*Yb 1 s( 15.62%)p<br>0.00( 0.05%)d 5.39( 84.19%) f<br>0.01( 0.12%)g 0.00( 0.02%)<br>( 90.62%) 0.9520* P 1 s( 42.56%)p<br>1.35( 57.42%)d 0.00( 0.02%) | (0.23261) LV ( 2)Yb 2<br>s( 33.01%)p 0.00( 0.05%)d<br>2.02( 66.81%)f 0.00( 0.12%)g<br>0.00( 0.01%) | 15.42 |
| (1.65103) LP ( 1) P 1<br>s( 1.58%)p62.12( 98.41%)d<br>0.01( 0.01%)                                                                                                                                | (0.20778) LV ( 2)Yb 4<br>s( 30.64%)p 0.00( 0.10%)d<br>2.26( 69.16%)f 0.00( 0.09%)g<br>0.00( 0.02%) | 13.23 |
| (1.69952) BD ( 1)Yb 3- P 1<br>( 9.10%) 0.3016*Yb 3 s( 16.17%)p<br>0.00( 0.07%)d 5.17( 83.62%) f<br>0.01( 0.12%)g 0.00( 0.02%)<br>( 90.90%) 0.9534* P 1 s( 38.75%)p<br>1.58( 61.23%)d 0.00( 0.02%) | (0.20778) LV ( 2)Yb 4<br>s( 30.64%)p 0.00( 0.10%)d<br>2.26( 69.16%)f 0.00( 0.09%)g<br>0.00( 0.02%) | 7.32  |
| (1.72628) BD ( 1)Yb 1- P 1<br>( 9.38%) 0.3062*Yb 1 s( 15.62%)p<br>0.00( 0.05%)d 5.39( 84.19%) f<br>0.01( 0.12%)g 0.00( 0.02%)<br>( 90.62%) 0.9520* P 1 s( 42.56%)p<br>1.35( 57.42%)d 0.00( 0.02%) | (0.33310) LV ( 1)Yb 4<br>s( 10.64%)p 0.00( 0.02%)d<br>8.39( 89.26%)f 0.01( 0.07%)g<br>0.00( 0.01%) | 9.92  |
| (1.72628) BD ( 1)Yb 1- P 1<br>( 9.38%) 0.3062*Yb 1 s( 15.62%)p<br>0.00( 0.05%)d 5.39( 84.19%) f<br>0.01( 0.12%)g 0.00( 0.02%)<br>( 90.62%) 0.9520* P 1 s( 42.56%)p<br>1.35( 57.42%)d 0.00( 0.02%) | (0.20778) LV ( 2)Yb 4<br>s( 30.64%)p 0.00( 0.10%)d<br>2.26( 69.16%)f 0.00( 0.09%)g<br>0.00( 0.02%) | 56.60 |
| (1.72628) BD ( 1)Yb 1- P 1<br>( 9.38%) 0.3062*Yb 1 s( 15.62%)p<br>0.00( 0.05%)d 5.39( 84.19%) f<br>0.01( 0.12%)g 0.00( 0.02%)<br>( 90.62%) 0.9520* P 1 s( 42.56%)p<br>1.35( 57.42%)d 0.00( 0.02%) | (0.18191) LV ( 3)Yb 4<br>s( 18.43%)p 0.00( 0.07%)d<br>4.42( 81.39%)f 0.01( 0.10%)g<br>0.00( 0.01%) | 16.23 |
| (1.74295) LP ( 1) P 2<br>s( 1.58%)p62.12( 98.41%)d<br>0.01( 0.01%)                                                                                                                                | (0.30513) LV ( 1)Yb 1<br>s( 36.57%)p 0.00( 0.07%)d<br>1.73( 63.24%)f 0.00( 0.10%)g                 | 77.22 |

|                                                                     |                                                                                                                                                                                                   |            |
|---------------------------------------------------------------------|---------------------------------------------------------------------------------------------------------------------------------------------------------------------------------------------------|------------|
|                                                                     | 0.00( 0.02%)                                                                                                                                                                                      |            |
| (1.74295) LP ( 1) P 2<br>s( 1.58%)p62.12( 98.41%)d<br>0.01( 0.01%)  | (0.09927) LV ( 4)Yb 1<br>s( 16.15%)p 0.01( 0.22%)d<br>5.17( 83.46%)f 0.01( 0.16%)g<br>0.00( 0.01%)                                                                                                | 4.75       |
| (1.69941) LP ( 2) P 2<br>s( 49.50%)p 1.02( 50.46%)d<br>0.00( 0.04%) | (0.30138) LV ( 1)Yb 3<br>s( 37.20%)p 0.00( 0.03%)d<br>1.68( 62.67%)f 0.00( 0.08%)g<br>0.00( 0.01%)                                                                                                | 6.48       |
| (1.69941) LP ( 2) P 2<br>s( 49.50%)p 1.02( 50.46%)d<br>0.00( 0.04%) | (0.30513) LV ( 1)Yb 1<br>s( 36.57%)p 0.00( 0.07%)d<br>1.73( 63.24%)f 0.00( 0.10%)g<br>0.00( 0.02%)                                                                                                | 18.37      |
| (1.69941) LP ( 2) P 2<br>s( 49.50%)p 1.02( 50.46%)d<br>0.00( 0.04%) | (0.12041) LV ( 3)Yb 1<br>s( 13.90%)p 0.01( 0.13%)d<br>6.18( 85.91%)f 0.00( 0.06%)g<br>0.00( 0.01%)                                                                                                | 9.97       |
| (1.69941) LP ( 2) P 2<br>s( 49.50%)p 1.02( 50.46%)d<br>0.00( 0.04%) | (0.07178) BD*( 1)Yb 1- P 1<br>( 90.62%) 0.9520*Yb 1 s( 15.62%)p<br>0.00( 0.05%)d 5.39( 84.19%)f<br>0.01( 0.12%)g 0.00( 0.02%)<br>( 9.38%) -0.3062* P 1 s( 42.56%)p<br>1.35( 57.42%)d 0.00( 0.02%) | 5.86       |
| (1.74295) LP ( 1) P 2<br>s( 1.58%)p62.12( 98.41%)d<br>0.01( 0.01%)  | (0.19211) LV ( 3)Yb 2<br>s( 11.53%)p 0.00( 0.05%)d<br>7.66( 88.31%)f 0.01( 0.10%)g<br>0.00( 0.01%)                                                                                                | 10.92      |
| (1.74295) LP ( 1) P 2<br>s( 1.58%)p62.12( 98.41%)d<br>0.01( 0.01%)  | (0.08130) LV ( 6)Yb 2<br>s( 4.83%)p<br>0.03( 0.12%)d19.62( 94.86%)f<br>0.03( 0.15%)g 0.01( 0.03%)                                                                                                 | 5.97       |
| (1.69941) LP ( 2) P 2<br>s( 49.50%)p 1.02( 50.46%)d<br>0.00( 0.04%) | (0.36958) LV ( 1)Yb 2<br>s( 11.98%)p 0.00( 0.01%)d<br>7.34( 87.93%)f 0.01( 0.07%)g<br>0.00( 0.01%)                                                                                                | 121.7<br>3 |
| (1.69941) LP ( 2) P 2<br>s( 49.50%)p 1.02( 50.46%)d<br>0.00( 0.04%) | (0.23261) LV ( 2)Yb 2<br>s( 33.01%)p 0.00( 0.05%)d<br>2.02( 66.81%)f 0.00( 0.12%)g<br>0.00( 0.01%)                                                                                                | 12.10      |
| (1.74295) LP ( 1) P 2<br>s( 1.58%)p62.12( 98.41%)d<br>0.01( 0.01%)  | (0.33310) LV ( 1)Yb 4<br>s( 10.64%)p 0.00( 0.02%)d<br>8.39( 89.26%)f 0.01( 0.07%)g<br>0.00( 0.01%)                                                                                                | 5.17       |

|                                                                     |                                                                                                                                                                                                    |       |
|---------------------------------------------------------------------|----------------------------------------------------------------------------------------------------------------------------------------------------------------------------------------------------|-------|
| (1.74616) LP ( 1) P 4<br>s( 9.24%)p 9.82( 90.72%)d<br>0.00( 0.04%)  | (0.30138) LV ( 1)Yb 3<br>s( 37.20%)p 0.00( 0.03%)d<br>1.68( 62.67%)f 0.00( 0.08%)g<br>0.00( 0.01%)                                                                                                 | 5.87  |
| (1.74616) LP ( 1) P 4<br>s( 9.24%)p 9.82( 90.72%)d<br>0.00( 0.04%)  | (0.18423) LV ( 2)Yb 3<br>s( 18.35%)p 0.00( 0.05%)d<br>4.44( 81.40%)f 0.01( 0.19%)g<br>0.00( 0.02%)                                                                                                 | 9.24  |
| (1.74616) LP ( 1) P 4<br>s( 9.24%)p 9.82( 90.72%)d<br>0.00( 0.04%)  | (0.30513) LV ( 1)Yb 1<br>s( 36.57%)p 0.00( 0.07%)d<br>1.73( 63.24%)f 0.00( 0.10%)g<br>0.00( 0.02%)                                                                                                 | 7.27  |
| (1.72329) LP ( 2) P 4<br>s( 54.92%)p 0.82( 45.04%)d<br>0.00( 0.04%) | (0.30138) LV ( 1)Yb 3<br>s( 37.20%)p 0.00( 0.03%)d<br>1.68( 62.67%)f 0.00( 0.08%)g<br>0.00( 0.01%)                                                                                                 | 93.26 |
| (1.72329) LP ( 2) P 4<br>s( 54.92%)p 0.82( 45.04%)d<br>0.00( 0.04%) | (0.12810) LV ( 3)Yb 3<br>s( 0.83%)p<br>0.11( 0.09%)d99.99( 98.99%)f<br>0.08( 0.06%)g 0.02( 0.01%)                                                                                                  | 19.46 |
| (1.72329) LP ( 2) P 4<br>s( 54.92%)p 0.82( 45.04%)d<br>0.00( 0.04%) | (0.07855) LV ( 5)Yb 3<br>s( 0.16%)p<br>0.93( 0.15%)d99.99( 99.62%)f<br>0.44( 0.07%)g 0.09( 0.01%)                                                                                                  | 6.07  |
| (1.72329) LP ( 2) P 4<br>s( 54.92%)p 0.82( 45.04%)d<br>0.00( 0.04%) | (0.08408) BD*( 1)Yb 3- P 1<br>( 90.90%) 0.9534*Yb 3 s( 16.17%)p<br>0.00( 0.07%)d 5.17( 83.62%) f<br>0.01( 0.12%)g 0.00( 0.02%)<br>( 9.10%) -0.3016* P 1 s( 38.75%)p<br>1.58( 61.23%)d 0.00( 0.02%) | 11.15 |
| (1.72329) LP ( 2) P 4<br>s( 54.92%)p 0.82( 45.04%)d<br>0.00( 0.04%) | (0.36958) LV ( 1)Yb 2<br>s( 11.98%)p 0.00( 0.01%)d<br>7.34( 87.93%)f 0.01( 0.07%)g<br>0.00( 0.01%)                                                                                                 | 5.36  |
| (1.74616) LP ( 1) P 4<br>s( 9.24%)p 9.82( 90.72%)d<br>0.00( 0.04%)  | (0.33310) LV ( 1)Yb 4<br>s( 10.64%)p 0.00( 0.02%)d<br>8.39( 89.26%)f 0.01( 0.07%)g<br>0.00( 0.01%)                                                                                                 | 77.68 |
| (1.74616) LP ( 1) P 4<br>s( 9.24%)p 9.82( 90.72%)d<br>0.00( 0.04%)  | (0.20778) LV ( 2)Yb 4<br>s( 30.64%)p 0.00( 0.10%)d<br>2.26( 69.16%)f 0.00( 0.09%)g<br>0.00( 0.02%)                                                                                                 | 7.55  |
| (1.74616) LP ( 1) P 4                                               | (0.18191) LV ( 3)Yb 4                                                                                                                                                                              | 5.73  |

|                                                                     |                                                                                                     |       |
|---------------------------------------------------------------------|-----------------------------------------------------------------------------------------------------|-------|
| s( 9.24%)p 9.82( 90.72%)d<br>0.00( 0.04%)                           | s( 18.43%)p 0.00( 0.07%)d<br>4.42( 81.39%)f 0.01( 0.10%)g<br>0.00( 0.01%)                           |       |
| (1.74616) LP ( 1) P 4<br>s( 9.24%)p 9.82( 90.72%)d<br>0.00( 0.04%)  | (0.06354) LV ( 6) Yb 4<br>s( 8.14%)p<br>0.03( 0.21%)d11.24( 91.58%)f<br>0.01( 0.05%)g 0.00( 0.01%)  | 5.55  |
| (1.72329) LP ( 2) P 4<br>s( 54.92%)p 0.82( 45.04%)d<br>0.00( 0.04%) | (0.33310) LV ( 1) Yb 4<br>s( 10.64%)p 0.00( 0.02%)d<br>8.39( 89.26%)f 0.01( 0.07%)g<br>0.00( 0.01%) | 28.88 |
| (1.70288) LP ( 1) P 3<br>s( 0.15%)p99.99( 99.84%)d<br>0.07( 0.01%)  | (0.30138) LV ( 1) Yb 3<br>s( 37.20%)p 0.00( 0.03%)d<br>1.68( 62.67%)f 0.00( 0.08%)g<br>0.00( 0.01%) | 7.24  |
| (1.70288) LP ( 1) P 3<br>s( 0.15%)p99.99( 99.84%)d<br>0.07( 0.01%)  | (0.10992) LV ( 4) Yb 3<br>s( 27.19%)p 0.01( 0.16%)d<br>2.67( 72.56%)f 0.00( 0.08%)g<br>0.00( 0.01%) | 16.94 |
| (1.66634) LP ( 2) P 3<br>s( 61.72%)p 0.62( 38.24%)d<br>0.00( 0.05%) | (0.30138) LV ( 1) Yb 3<br>s( 37.20%)p 0.00( 0.03%)d<br>1.68( 62.67%)f 0.00( 0.08%)g<br>0.00( 0.01%) | 62.67 |
| (1.70288) LP ( 1) P 3<br>s( 0.15%)p99.99( 99.84%)d<br>0.07( 0.01%)  | (0.36958) LV ( 1) Yb 2<br>s( 11.98%)p 0.00( 0.01%)d<br>7.34( 87.93%)f 0.01( 0.07%)g<br>0.00( 0.01%) | 21.64 |
| (1.70288) LP ( 1) P 3<br>s( 0.15%)p99.99( 99.84%)d<br>0.07( 0.01%)  | (0.19211) LV ( 3) Yb 2<br>s( 11.53%)p 0.00( 0.05%)d<br>7.66( 88.31%)f 0.01( 0.10%)g<br>0.00( 0.01%) | 5.68  |
| (1.70288) LP ( 1) P 3<br>s( 0.15%)p99.99( 99.84%)d<br>0.07( 0.01%)  | (0.12845) LV ( 4) Yb 2<br>s( 24.20%)p 0.00( 0.05%)d<br>3.12( 75.61%)f 0.01( 0.12%)g<br>0.00( 0.02%) | 5.31  |
| (1.70288) LP ( 1) P 3<br>s( 0.15%)p99.99( 99.84%)d<br>0.07( 0.01%)  | (0.11786) LV ( 5) Yb 2<br>s( 14.24%)p 0.01( 0.12%)d<br>6.00( 85.50%)f 0.01( 0.13%)g<br>0.00( 0.01%) | 7.91  |
| (1.66634) LP ( 2) P 3<br>s( 61.72%)p 0.62( 38.24%)d<br>0.00( 0.05%) | (0.36958) LV ( 1) Yb 2<br>s( 11.98%)p 0.00( 0.01%)d<br>7.34( 87.93%)f 0.01( 0.07%)g<br>0.00( 0.01%) | 78.10 |

|                                                                     |                                                                                                                                                                                                    |       |
|---------------------------------------------------------------------|----------------------------------------------------------------------------------------------------------------------------------------------------------------------------------------------------|-------|
| (1.66634) LP ( 2) P 3<br>s( 61.72%)p 0.62( 38.24%)d<br>0.00( 0.05%) | (0.23261) LV ( 2)Yb 2<br>s( 33.01%)p 0.00( 0.05%)d<br>2.02( 66.81%)f 0.00( 0.12%)g<br>0.00( 0.01%)                                                                                                 | 8.05  |
| (1.64639) LP ( 2) P 5<br>s( 31.01%)p 2.22( 68.94%)d<br>0.00( 0.06%) | (0.30513) LV ( 1)Yb 1<br>s( 36.57%)p 0.00( 0.07%)d<br>1.73( 63.24%)f 0.00( 0.10%)g<br>0.00( 0.02%)                                                                                                 | 59.05 |
| (1.64639) LP ( 2) P 5<br>s( 31.01%)p 2.22( 68.94%)d<br>0.00( 0.06%) | (0.07178) BD*( 1)Yb 1- P 1<br>( 90.62%) 0.9520*Yb 1 s( 15.62%)p<br>0.00( 0.05%)d 5.39( 84.19%)f<br>0.01( 0.12%)g 0.00( 0.02%)<br>( 9.38%) -0.3062* P 1 s( 42.56%)p<br>1.35( 57.42%)d 0.00( 0.02%)  | 9.89  |
| (1.76459) LP ( 1) P 5<br>s( 30.30%)p 2.30( 69.69%)d<br>0.00( 0.01%) | (0.33310) LV ( 1)Yb 4<br>s( 10.64%)p 0.00( 0.02%)d<br>8.39( 89.26%)f 0.01( 0.07%)g<br>0.00( 0.01%)                                                                                                 | 56.03 |
| (1.76459) LP ( 1) P 5<br>s( 30.30%)p 2.30( 69.69%)d<br>0.00( 0.01%) | (0.13146) LV ( 4)Yb 4<br>s( 31.79%)p 0.01( 0.23%)d<br>2.13( 67.80%)f 0.00( 0.15%)g<br>0.00( 0.02%)                                                                                                 | 10.52 |
| (1.64639) LP ( 2) P 5<br>s( 31.01%)p 2.22( 68.94%)d<br>0.00( 0.06%) | (0.33310) LV ( 1)Yb 4<br>s( 10.64%)p 0.00( 0.02%)d<br>8.39( 89.26%)f 0.01( 0.07%)g<br>0.00( 0.01%)                                                                                                 | 27.99 |
| (1.64639) LP ( 2) P 5<br>s( 31.01%)p 2.22( 68.94%)d<br>0.00( 0.06%) | (0.20778) LV ( 2)Yb 4<br>s( 30.64%)p 0.00( 0.10%)d<br>2.26( 69.16%)f 0.00( 0.09%)g<br>0.00( 0.02%)                                                                                                 | 5.41  |
| (1.92073) LP ( 2) O 2<br>s( 39.73%)p 1.52( 60.25%)d<br>0.00( 0.02%) | (0.07855) LV ( 5)Yb 3<br>s( 0.16%)p<br>0.93( 0.15%)d99.99( 99.62%)f<br>0.44( 0.07%)g 0.09( 0.01%)                                                                                                  | 26.22 |
| (1.92073) LP ( 2) O 2<br>s( 39.73%)p 1.52( 60.25%)d<br>0.00( 0.02%) | (0.08408) BD*( 1)Yb 3- P 1<br>( 90.90%) 0.9534*Yb 3 s( 16.17%)p<br>0.00( 0.07%)d 5.17( 83.62%) f<br>0.01( 0.12%)g 0.00( 0.02%)<br>( 9.10%) -0.3016* P 1 s( 38.75%)p<br>1.58( 61.23%)d 0.00( 0.02%) | 16.33 |
| (1.92302) LP ( 1) O 4<br>s( 28.44%)p 2.51( 71.53%)d<br>0.00( 0.03%) | (0.18107) LV ( 2)Yb 1<br>s( 11.35%)p 0.01( 0.08%)d<br>7.79( 88.46%)f 0.01( 0.10%)g                                                                                                                 | 18.49 |

|                                                                     |                                                                                                                                                                                                   |       |
|---------------------------------------------------------------------|---------------------------------------------------------------------------------------------------------------------------------------------------------------------------------------------------|-------|
|                                                                     | 0.00( 0.01%)                                                                                                                                                                                      |       |
| (1.92302) LP ( 1) O 4<br>s( 28.44%)p 2.51( 71.53%)d<br>0.00( 0.03%) | (0.07091) LV ( 5)Yb 1<br>s( 6.16%)p<br>0.01( 0.06%)d15.20( 93.71%)f<br>0.01( 0.05%)g 0.00( 0.01%)                                                                                                 | 7.57  |
| (1.92302) LP ( 1) O 4<br>s( 28.44%)p 2.51( 71.53%)d<br>0.00( 0.03%) | (0.07178) BD*( 1)Yb 1- P 1<br>( 90.62%) 0.9520*Yb 1 s( 15.62%)p<br>0.00( 0.05%)d 5.39( 84.19%)f<br>0.01( 0.12%)g 0.00( 0.02%)<br>( 9.38%) -0.3062* P 1 s( 42.56%)p<br>1.35( 57.42%)d 0.00( 0.02%) | 9.78  |
| (1.92130) LP ( 2) O 4<br>s( 11.81%)p 7.47( 88.15%)d<br>0.00( 0.04%) | (0.07091) LV ( 5)Yb 1<br>s( 6.16%)p<br>0.01( 0.06%)d15.20( 93.71%)f<br>0.01( 0.05%)g 0.00( 0.01%)                                                                                                 | 6.13  |
| (1.92130) LP ( 2) O 4<br>s( 11.81%)p 7.47( 88.15%)d<br>0.00( 0.04%) | (0.07178) BD*( 1)Yb 1- P 1<br>( 90.62%) 0.9520*Yb 1 s( 15.62%)p<br>0.00( 0.05%)d 5.39( 84.19%)f<br>0.01( 0.12%)g 0.00( 0.02%)<br>( 9.38%) -0.3062* P 1 s( 42.56%)p<br>1.35( 57.42%)d 0.00( 0.02%) | 10.79 |
| (1.91963) LP ( 2) O 1<br>s( 32.51%)p 2.08( 67.47%)d<br>0.00( 0.02%) | (0.36958) LV ( 1)Yb 2<br>s( 11.98%)p 0.00( 0.01%)d<br>7.34( 87.93%)f 0.01( 0.07%)g<br>0.00( 0.01%)                                                                                                | 8.53  |
| (1.91963) LP ( 2) O 1<br>s( 32.51%)p 2.08( 67.47%)d<br>0.00( 0.02%) | (0.23261) LV ( 2)Yb 2<br>s( 33.01%)p 0.00( 0.05%)d<br>2.02( 66.81%)f 0.00( 0.12%)g<br>0.00( 0.01%)                                                                                                | 26.22 |
| (1.91963) LP ( 2) O 1<br>s( 32.51%)p 2.08( 67.47%)d<br>0.00( 0.02%) | (0.08130) LV ( 6)Yb 2<br>s( 4.83%)p<br>0.03( 0.12%)d19.62( 94.86%)f<br>0.03( 0.15%)g 0.01( 0.03%)                                                                                                 | 7.23  |

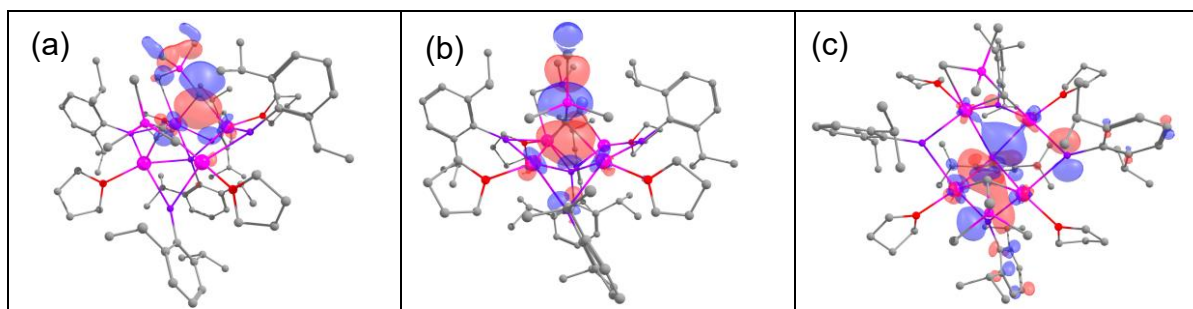

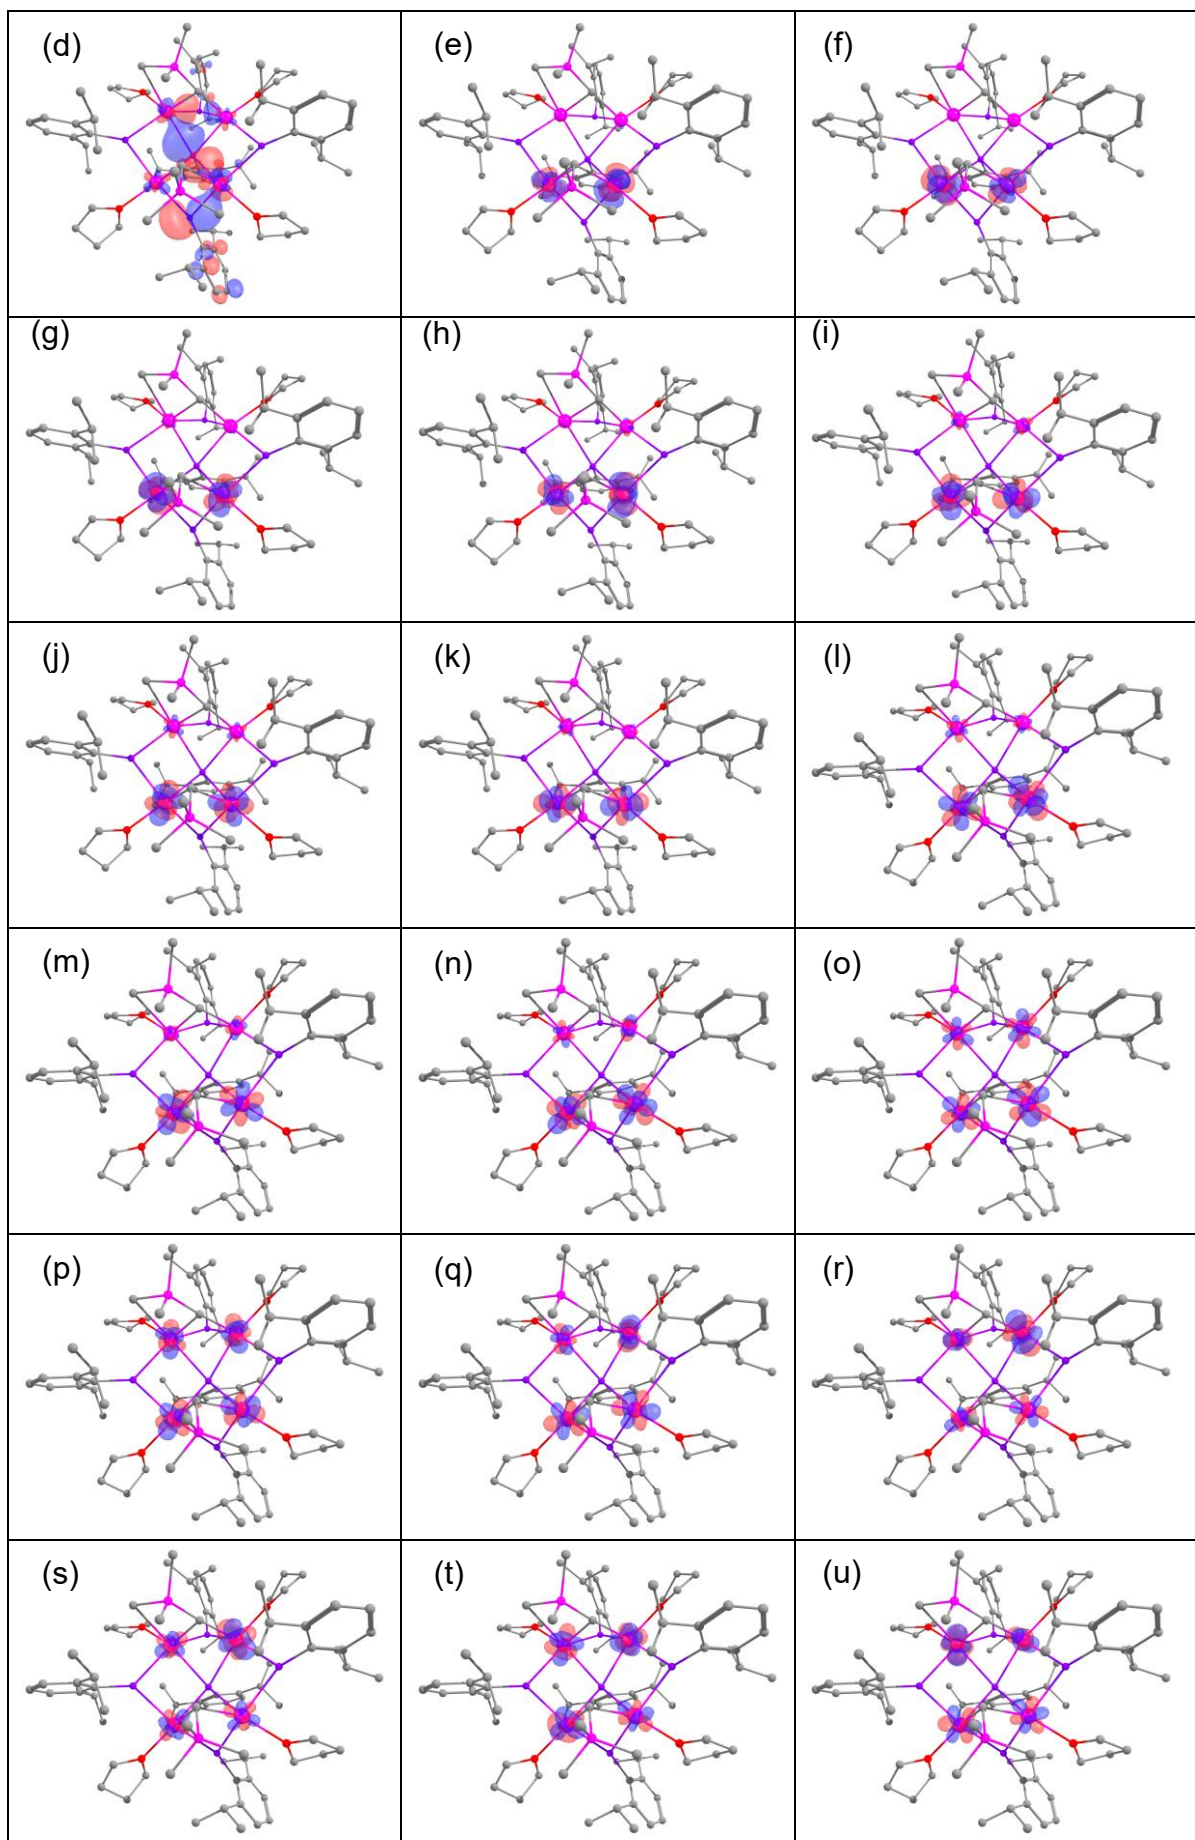

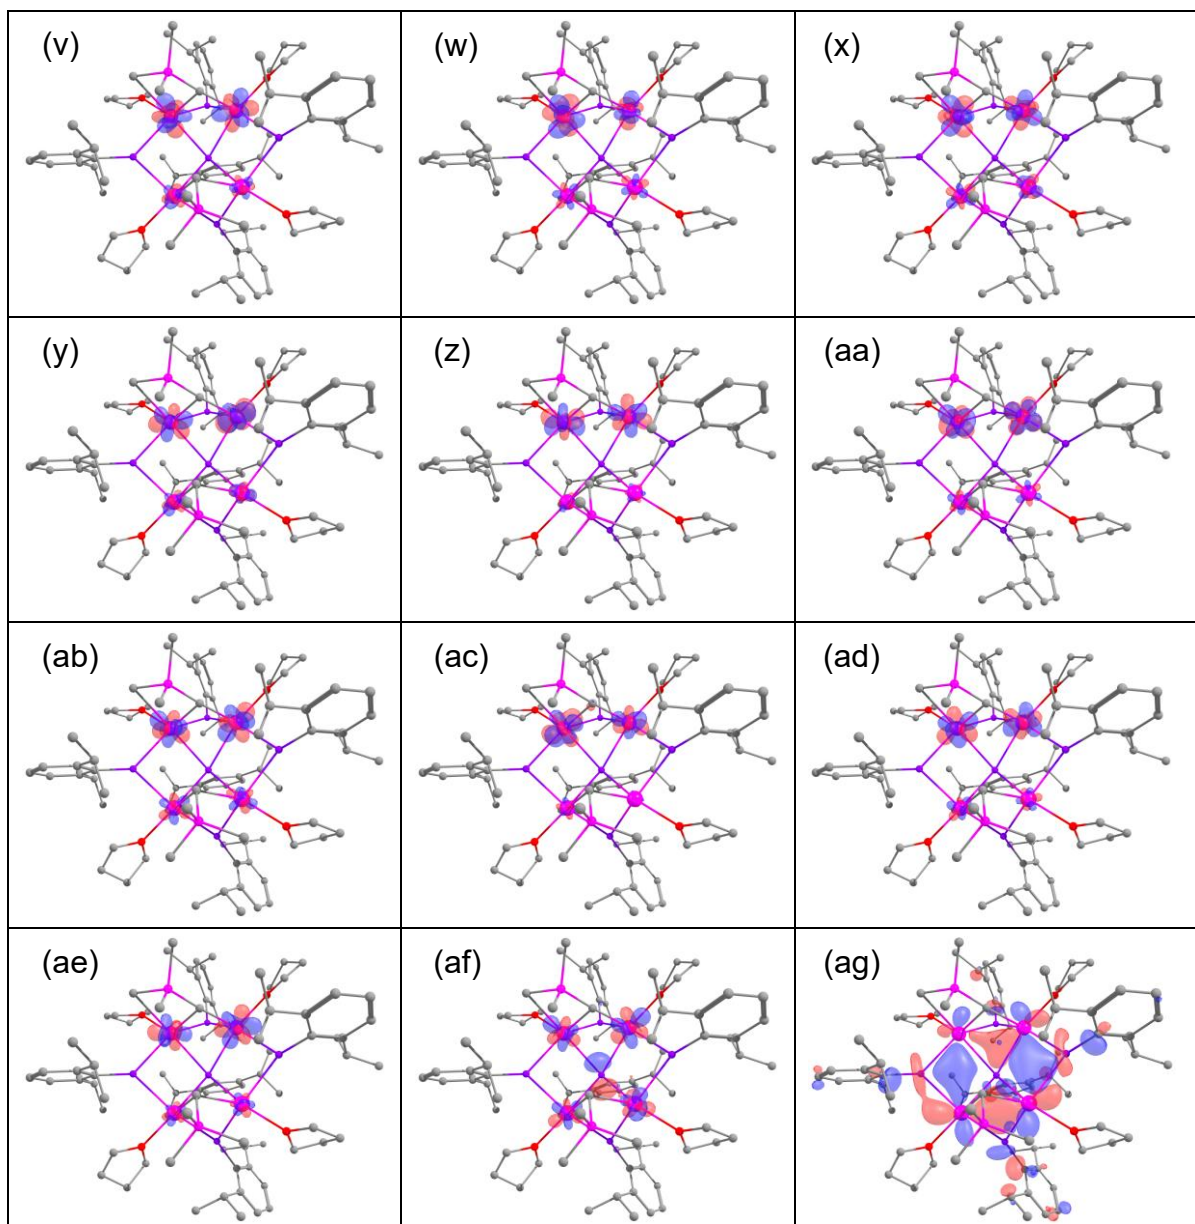

**Fig. S52** Computed MOs for complex **3** (dispersion). (a)HOMO-35 (b)HOMO-34 (c)HOMO-30 (d)HOMO-28 (e)HOMO-27 (f)HOMO-26 (g)HOMO-25 (h)HOMO-24 (i)HOMO-23 (j)HOMO-22 (k)HOMO-21 (l)HOMO-20 (m)HOMO-19 (n)HOMO-18 (o)HOMO-17 (p)HOMO-16 (q)HOMO-15 (r)HOMO-14 (s)HOMO-13 (t)HOMO-12 (u)HOMO-11 (v)HOMO-10 (w)HOMO-9 (x)HOMO-8 (y)HOMO-7 (z)HOMO-6 (aa)HOMO-5 (ab)HOMO-4 (ac)HOMO-3 (ad)HOMO-2 (ae)HOMO-1 (af)HOMO (ag)LUMO.

**Table S7** NBO analysis of canonical molecular orbitals for complex **3** (dispersion).

|                                                                                  |                                                                    |
|----------------------------------------------------------------------------------|--------------------------------------------------------------------|
| MO 410 (occ): orbital energy = -<br>0.16339 a.u.<br>0.419*[169]: LP ( 1) P 1(lp) | (1.65103) LP ( 1) P 1<br>s( 1.58%)p62.12( 98.41%)d<br>0.01( 0.01%) |
|----------------------------------------------------------------------------------|--------------------------------------------------------------------|

|                                                                                                                                                                                                                                                                             |                                                                                                                                                                                                                                                                                                                                                                                                                                                                                                                                                                                                                                                                                                                                                                                               |
|-----------------------------------------------------------------------------------------------------------------------------------------------------------------------------------------------------------------------------------------------------------------------------|-----------------------------------------------------------------------------------------------------------------------------------------------------------------------------------------------------------------------------------------------------------------------------------------------------------------------------------------------------------------------------------------------------------------------------------------------------------------------------------------------------------------------------------------------------------------------------------------------------------------------------------------------------------------------------------------------------------------------------------------------------------------------------------------------|
| <p>-0.369*[191]: BD ( 1)Yb 3- P 1<br/> -0.296*[176]: LP ( 1) P 5(lp)<br/> 0.269*[192]: BD ( 1)Yb 1- P 1<br/> -0.229*[170]: LP ( 1) P 2(lp)</p>                                                                                                                              | <p><u>(1.69952) BD ( 1)Yb 3- P 1</u><br/> ( 9.10%) 0.3016*Yb 3 s( 16.17%)p<br/> 0.00( 0.07%)d 5.17( 83.62%)f<br/> 0.01( 0.12%)g 0.00( 0.02%)<br/> ( 90.90%) 0.9534* P 1 s( 38.75%)p<br/> 1.58( 61.23%)d 0.00( 0.02%)<br/> <u>(1.76459) LP ( 1) P 5</u><br/> s( 30.30%)p 2.30( 69.69%)d<br/> 0.00( 0.01%)<br/> <u>(1.72628) BD ( 1)Yb 1- P 1</u><br/> ( 9.38%) 0.3062*Yb 1 s( 15.62%)p<br/> 0.00( 0.05%)d 5.39( 84.19%)f<br/> 0.01( 0.12%)g 0.00( 0.02%)<br/> ( 90.62%) 0.9520* P 1 s( 42.56%)p<br/> 1.35( 57.42%)d 0.00( 0.02%)<br/> <u>(1.74295) LP ( 1) P 2</u><br/> s( 13.74%)p 6.28( 86.25%)d<br/> 0.00( 0.01%)</p>                                                                                                                                                                       |
| <p>MO 412 (occ): orbital energy = -<br/> 0.15267 a.u.<br/> 0.355*[192]: BD ( 1)Yb 1- P 1<br/> -0.320*[177]: LP ( 2) P 5(lp)<br/> 0.306*[176]: LP ( 1) P 5(lp)<br/> -0.300*[191]: BD ( 1)Yb 3- P 1<br/> -0.297*[174]: LP ( 1) P 3(lp)<br/> -0.294*[169]: LP ( 1) P 1(lp)</p> | <p><u>(1.72628) BD ( 1)Yb 1- P 1</u><br/> ( 9.38%) 0.3062*Yb 1 s( 15.62%)p<br/> 0.00( 0.05%)d 5.39( 84.19%)f<br/> 0.01( 0.12%)g 0.00( 0.02%)<br/> ( 90.62%) 0.9520* P 1 s( 42.56%)p<br/> 1.35( 57.42%)d 0.00( 0.02%)<br/> <u>(1.64639) LP ( 2) P 5</u><br/> s( 31.01%)p 2.22( 68.94%)d<br/> 0.00( 0.06%)<br/> <u>(1.76459) LP ( 1) P 5</u><br/> s( 30.30%)p 2.30( 69.69%)d<br/> 0.00( 0.01%)<br/> <u>(1.69952) BD ( 1)Yb 3- P 1</u><br/> ( 9.10%) 0.3016*Yb 3 s( 16.17%)p<br/> 0.00( 0.07%)d 5.17( 83.62%)f<br/> 0.01( 0.12%)g 0.00( 0.02%)<br/> ( 90.90%) 0.9534* P 1 s( 38.75%)p<br/> 1.58( 61.23%)d 0.00( 0.02%)<br/> <u>(1.70288) LP ( 1) P 3</u><br/> s( 0.15%)p99.99( 99.84%)d<br/> 0.07( 0.01%)<br/> <u>(1.65103) LP ( 1) P 1</u><br/> s( 1.58%)p62.12( 98.41%)d<br/> 0.01( 0.01%)</p> |

**Table S8** Computed BCP descriptors for complex **3** (dispersion).

| Atom labels | $\rho(r)$ | $\nabla^2\rho(r)$ | $G(r)$ | $V(r)$ | $H(r)$ | $\varepsilon$ |
|-------------|-----------|-------------------|--------|--------|--------|---------------|
| Yb3-P1      | 0.03      | 0.07              | 0.02   | -0.02  | -0.003 | 0.21          |
| Yb1-P1      | 0.03      | 0.07              | 0.02   | -0.02  | -0.004 | 0.26          |
| Yb2-P1      | 0.03      | 0.07              | 0.02   | -0.03  | -0.004 | 0.22          |
| Yb4-P1      | 0.04      | 0.07              | 0.02   | -0.03  | -0.005 | 0.23          |
| Yb1-P2      | 0.03      | 0.07              | 0.02   | -0.02  | -0.003 | 0.05          |
| Yb2-P2      | 0.03      | 0.08              | 0.02   | -0.03  | -0.004 | 0.05          |
| Yb3-P4      | 0.03      | 0.07              | 0.02   | -0.03  | -0.004 | 0.05          |
| Yb4-P4      | 0.03      | 0.08              | 0.02   | -0.03  | -0.004 | 0.05          |
| Yb3-P3      | 0.03      | 0.08              | 0.02   | -0.03  | -0.004 | 0.10          |
| Yb2-P3      | 0.04      | 0.08              | 0.03   | -0.03  | -0.005 | 0.15          |
| Yb1-P5      | 0.03      | 0.07              | 0.02   | -0.03  | -0.004 | 0.09          |
| Yb4-P5      | 0.03      | 0.08              | 0.02   | -0.03  | -0.003 | 0.25          |
| Yb3-O2      | 0.04      | 0.19              | 0.04   | -0.04  | 0.003  | 0.18          |
| Yb1-O4      | 0.04      | 0.18              | 0.04   | -0.04  | 0.003  | 0.19          |
| Yb2-O1      | 0.04      | 0.21              | 0.05   | -0.05  | 0.003  | 0.15          |
| Yb4-O3      | 0.04      | 0.20              | 0.05   | -0.04  | 0.003  | 0.15          |
| Yb1-C5      | 0.04      | 0.12              | 0.03   | -0.04  | -0.003 | 0.13          |
| Yb4-C5      | 0.04      | 0.12              | 0.04   | -0.04  | -0.004 | 0.18          |
| Yb3-C1      | 0.04      | 0.11              | 0.03   | -0.03  | -0.003 | 0.13          |
| Yb2-C1      | 0.04      | 0.14              | 0.04   | -0.04  | -0.005 | 0.09          |

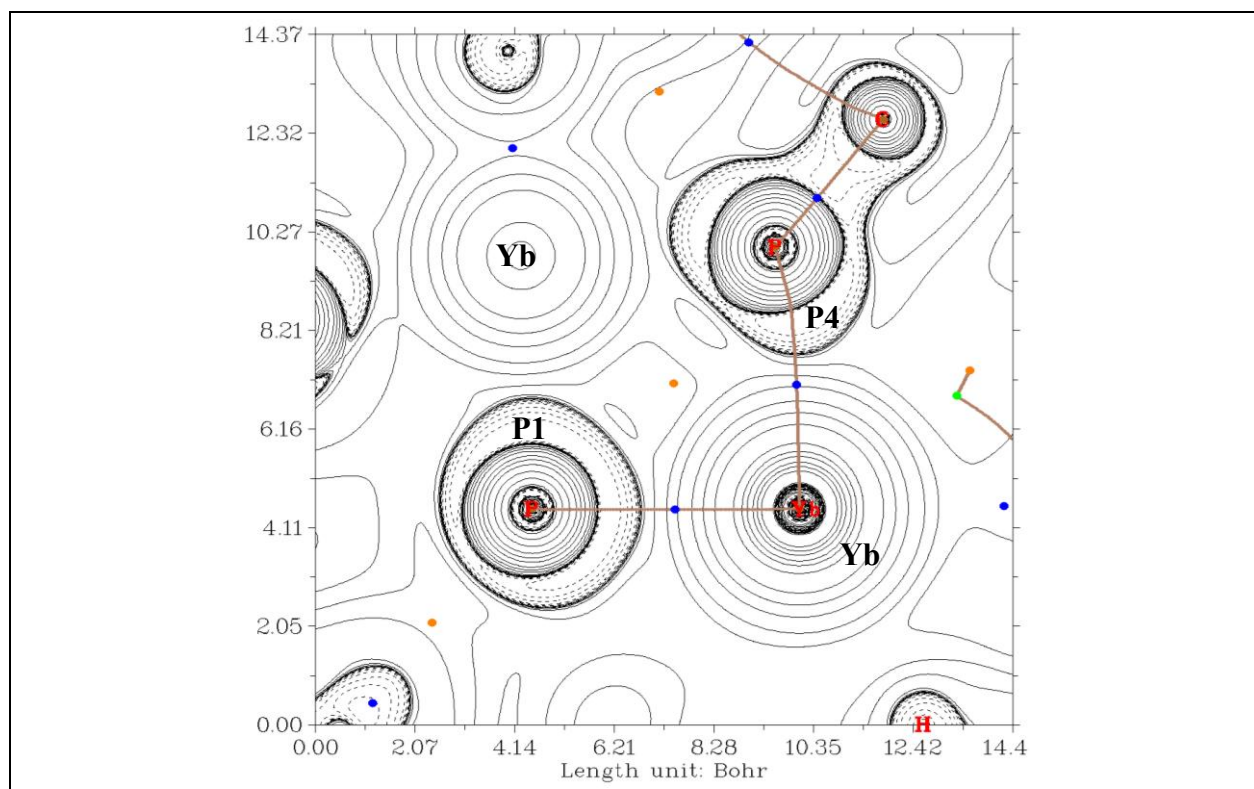

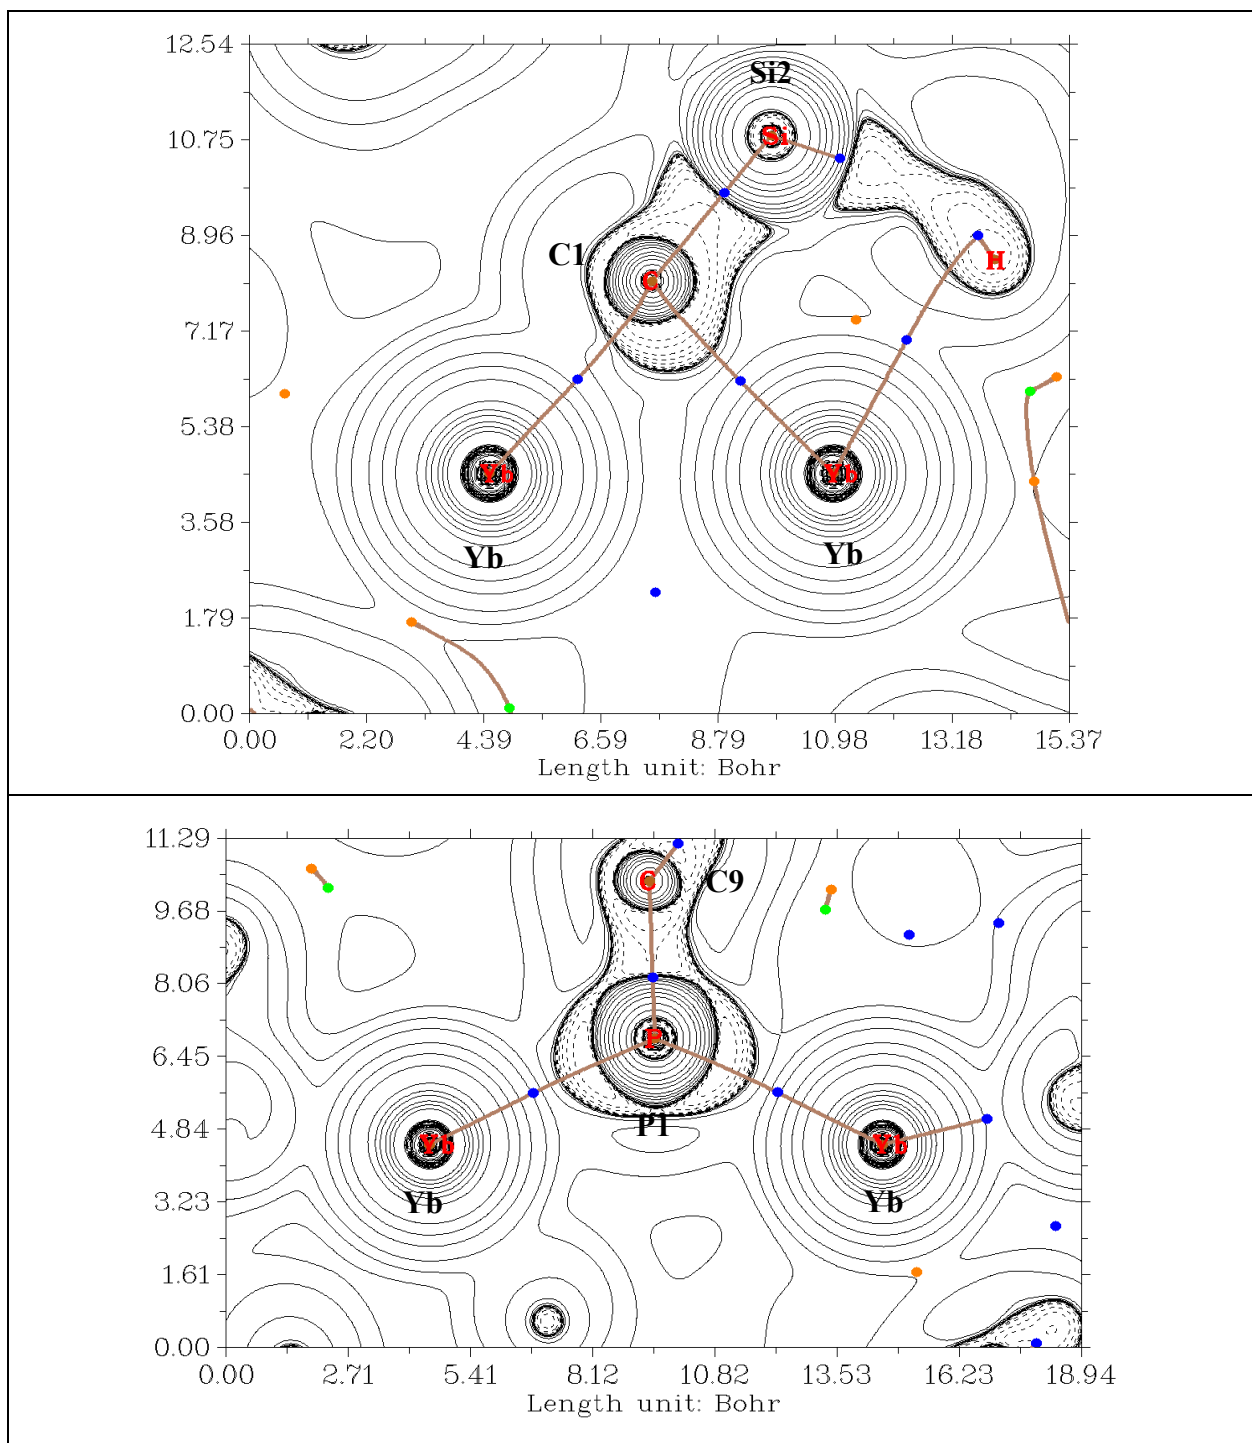

**Fig. S53** Computed Laplacian distribution for complex **3** (dispersion).

**Table S9** Comparison of bond distance (Å) between selected atoms in DFT optimized and X-ray structure for complex **4**.

| Atom labels | DFT           |            | X-ray |
|-------------|---------------|------------|-------|
|             | No dispersion | dispersion |       |
| Yb3-P4      | 2.90          | 2.86       | 2.87  |
| Yb3-P3      | 2.97          | 2.88       | 2.92  |
| Yb3-P1      | 2.83          | 2.78       | 2.80  |

|        |      |      |      |
|--------|------|------|------|
| Yb3-P5 | 2.99 | 2.88 | 2.94 |
| Yb5-P4 | 3.07 | 2.92 | 3.02 |
| Yb5-P3 | 2.93 | 2.87 | 2.87 |
| Yb5-P5 | 3.04 | 2.92 | 3.01 |
| Yb5-P6 | 2.95 | 2.87 | 2.93 |
| Yb5-O5 | 2.47 | 2.41 | 2.45 |
| Yb4-P4 | 2.93 | 2.88 | 2.89 |
| Yb4-P3 | 3.04 | 2.96 | 3.00 |
| Yb4-P2 | 2.91 | 2.80 | 2.84 |
| Yb4-P6 | 3.12 | 2.96 | 3.01 |
| Yb4-O4 | 2.49 | 2.43 | 2.46 |
| Yb1-P3 | 3.12 | 2.95 | 3.02 |
| Yb1-P1 | 2.97 | 2.92 | 2.97 |
| Yb1-P2 | 2.86 | 2.77 | 2.80 |
| Yb1-O1 | 2.56 | 2.45 | 2.53 |
| Yb1-O2 | 2.51 | 2.43 | 2.44 |
| Yb2-P4 | 2.96 | 2.91 | 2.95 |
| Yb2-P1 | 2.82 | 2.75 | 2.77 |
| Yb2-P2 | 2.87 | 2.81 | 2.86 |
| Yb2-O3 | 2.48 | 2.41 | 2.45 |

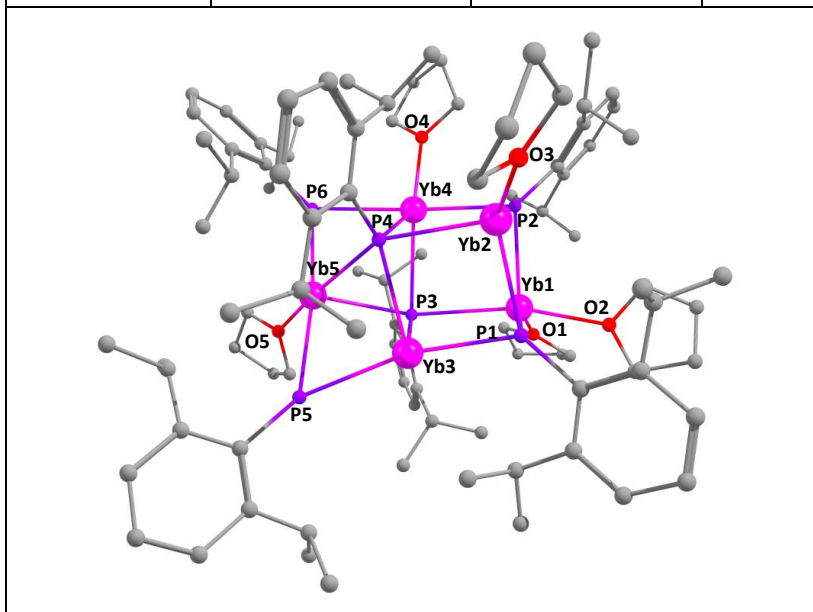

**Table S10** Computed natural charges for selected atoms in complex **4**.

| Atom label | Natural charges |            |
|------------|-----------------|------------|
|            | No dispersion   | dispersion |
| Yb3        | 0.88406         | 0.68428    |
| Yb5        | 1.09155         | 0.89216    |
| Yb4        | 1.04482         | 0.83444    |

|     |          |          |
|-----|----------|----------|
| Yb1 | 1.26986  | 1.12859  |
| Yb2 | 1.14286  | 0.89307  |
| P4  | -0.68038 | -0.48833 |
| P3  | -0.70277 | -0.51057 |
| P1  | -0.79518 | -0.62173 |
| P2  | -0.83910 | -0.64910 |
| P5  | -0.28579 | -0.19929 |
| P6  | -0.25616 | -0.17992 |
| O3  | -0.64712 | -0.63204 |
| O1  | -0.63961 | -0.63321 |
| O4  | -0.63400 | -0.62486 |
| O5  | -0.63622 | -0.61224 |
| O2  | -0.64182 | -0.63808 |

**Table S11** Computed Wiberg bond index for selected atoms in complex **4**.

| Atom labels | DFT           |            |
|-------------|---------------|------------|
|             | No dispersion | dispersion |
| Yb3-P4      | 0.4276        | 0.4484     |
| Yb3-P3      | 0.4017        | 0.4438     |
| Yb3-P1      | 0.4732        | 0.5096     |
| Yb3-P5      | 0.3577        | 0.3892     |
| Yb5-P4      | 0.2816        | 0.3501     |
| Yb5-P3      | 0.3751        | 0.4120     |
| Yb5-P5      | 0.2920        | 0.3252     |
| Yb5-P6      | 0.3218        | 0.3514     |
| Yb5-O5      | 0.1318        | 0.1520     |
| Yb4-P4      | 0.3610        | 0.3886     |
| Yb4-P3      | 0.3241        | 0.3643     |
| Yb4-P2      | 0.3889        | 0.4451     |
| Yb4-P6      | 0.2726        | 0.3304     |
| Yb4-O4      | 0.1358        | 0.1478     |
| Yb1-P3      | 0.2372        | 0.2853     |
| Yb1-P1      | 0.3232        | 0.3453     |
| Yb1-P2      | 0.3819        | 0.4442     |
| Yb1-O1      | 0.1090        | 0.1270     |
| Yb1-O2      | 0.1027        | 0.1145     |
| Yb2-P4      | 0.3103        | 0.3489     |
| Yb2-P1      | 0.4444        | 0.5285     |
| Yb2-P2      | 0.4167        | 0.4730     |
| Yb2-O3      | 0.1259        | 0.1530     |

Bonding orbitals between ytterbium and atoms in the first coordination sphere of metal in complex **4** (dispersion)

(0.89146) BD ( 1)Yb 3- P 4

( 11.12%) 0.3335\*Yb 3 s( 28.38%)p 0.00( 0.08%)d 2.52( 71.39%) f 0.00( 0.14%)g 0.00( 0.01%)

( 88.88%) 0.9428\* P 4 s( 37.05%)p 1.70( 62.92%)d 0.00( 0.03%)

(0.88787) BD ( 1)Yb 3- P 3

( 10.95%) 0.3310\*Yb 3 s( 33.39%)p 0.00( 0.10%)d 1.99( 66.36%) f 0.00( 0.13%)g 0.00( 0.02%)

( 89.05%) 0.9436\* P 3 s( 39.21%)p 1.55( 60.76%)d 0.00( 0.04%)

(0.92690) BD ( 1)Yb 3- P 5

( 10.78%) 0.3283\*Yb 3 s( 34.20%)p 0.00( 0.14%)d 1.92( 65.55%) f 0.00( 0.09%)g 0.00( 0.01%)

( 89.22%) 0.9446\* P 5 s( 59.50%)p 0.68( 40.47%)d 0.00( 0.04%)

(0.94500) BD ( 1)Yb 5- P 6

( 9.30%) 0.3050\*Yb 5 s( 19.62%)p 0.01( 0.11%)d 4.09( 80.15%) f 0.01( 0.10%)g 0.00( 0.01%)

( 90.70%) 0.9523\* P 6 s( 31.12%)p 2.21( 68.85%)d 0.00( 0.03%)

(0.88647) BD ( 1)Yb 4- P 4

( 9.86%) 0.3140\*Yb 4 s( 31.54%)p 0.01( 0.21%)d 2.16( 68.08%) f 0.00( 0.15%)g 0.00( 0.02%)

( 90.14%) 0.9494\* P 4 s( 43.78%)p 1.28( 56.19%)d 0.00( 0.03%)

(0.88176) BD ( 1)Yb 4- P 3

( 9.66%) 0.3108\*Yb 4 s( 31.05%)p 0.00( 0.08%)d 2.21( 68.75%) f 0.00( 0.11%)g 0.00( 0.01%)

( 90.34%) 0.9505\* P 3 s( 40.67%)p 1.46( 59.30%)d 0.00( 0.03%)

(0.88027) BD ( 1)Yb 4- P 2

( 6.18%) 0.2486\*Yb 4 s( 8.65%)p 0.06( 0.54%)d 10.45( 90.36%) f 0.05( 0.43%)g 0.00( 0.02%)

( 93.82%) 0.9686\* P 2 s( 44.32%)p 1.26( 55.65%)d 0.00( 0.03%)

(0.91230) BD ( 1)Yb 4- P 6

( 7.65%) 0.2766\*Yb 4 s( 24.39%)p 0.03( 0.65%)d 3.06( 74.58%) f 0.01( 0.36%)g 0.00( 0.01%)

( 92.35%) 0.9610\* P 6 s( 30.78%)p 2.25( 69.20%)d 0.00( 0.02%)

(0.92718) BD ( 1)Yb 2- P 1

( 9.98%) 0.3160\*Yb 2 s( 23.72%)p 0.01( 0.28%)d 3.19( 75.77%) f 0.01( 0.20%)g 0.00( 0.02%)

( 90.02%) 0.9488\* P 1 s( 26.99%)p 2.70( 72.99%)d 0.00( 0.02%)

(0.90240) BD ( 1)Yb 2- P 2

( 10.88%) 0.3298\*Yb 2 s( 18.32%)p 0.01( 0.14%)d 4.44( 81.40%) f 0.01( 0.13%)g 0.00( 0.01%)

( 89.12%) 0.9440\* P 2 s( 34.84%)p 1.87( 65.13%)d 0.00( 0.03%)

Bonding orbitals between ytterbium and atoms in the first coordination sphere of metal in complex **4** (no dispersion)

(0.91018) BD ( 1)Yb 3- P 4  
 ( 9.83%) 0.3135\*Yb 3 s( 27.76%)p 0.00( 0.08%)d 2.59( 72.01%) f 0.01( 0.14%)g  
 0.00( 0.01%)  
 ( 90.17%) 0.9496\* P 4 s( 36.64%)p 1.73( 63.32%)d 0.00( 0.03%)  
 (0.91004) BD ( 1)Yb 3- P 3  
 ( 8.70%) 0.2949\*Yb 3 s( 31.32%)p 0.00( 0.13%)d 2.18( 68.42%) f 0.00( 0.11%)g  
 0.00( 0.01%)  
 ( 91.30%) 0.9555\* P 3 s( 24.38%)p 3.10( 75.59%)d 0.00( 0.03%)  
 (0.91679) BD ( 1)Yb 3- P 1  
 ( 8.61%) 0.2934\*Yb 3 s( 18.04%)p 0.03( 0.59%)d 4.50( 81.10%) f 0.01( 0.26%)g  
 0.00( 0.02%)  
 ( 91.39%) 0.9560\* P 1 s( 38.06%)p 1.63( 61.91%)d 0.00( 0.03%)  
 (0.93791) BD ( 1)Yb 3- P 5  
 ( 7.46%) 0.2731\*Yb 3 s( 21.88%)p 0.04( 0.91%)d 3.52( 76.92%) f 0.01( 0.27%)g  
 0.00( 0.02%)  
 ( 92.54%) 0.9620\* P 5 s( 29.26%)p 2.42( 70.71%)d 0.00( 0.03%)  
 (0.93649) BD ( 1)Yb 5- P 5  
 ( 5.77%) 0.2401\*Yb 5 s( 17.82%)p 0.10( 1.84%)d 4.47( 79.74%) f 0.03( 0.56%)g  
 0.00( 0.03%)  
 ( 94.23%) 0.9707\* P 5 s( 32.13%)p 2.11( 67.85%)d 0.00( 0.02%)  
 (0.91005) BD ( 1)Yb 4- P 4  
 ( 8.49%) 0.2913\*Yb 4 s( 22.24%)p 0.01( 0.26%)d 3.48( 77.35%) f 0.01( 0.14%)g  
 0.00( 0.02%)  
 ( 91.51%) 0.9566\* P 4 s( 43.47%)p 1.30( 56.50%)d 0.00( 0.03%)  
 (0.91377) BD ( 1)Yb 1- P 2  
 ( 7.14%) 0.2673\*Yb 1 s( 22.47%)p 0.01( 0.32%)d 3.43( 76.98%) f 0.01( 0.20%)g  
 0.00( 0.03%)  
 ( 92.86%) 0.9636\* P 2 s( 34.19%)p 1.92( 65.78%)d 0.00( 0.03%)  
 (0.93134) BD ( 1)Yb 2- P 1  
 ( 8.51%) 0.2917\*Yb 2 s( 26.52%)p 0.01( 0.33%)d 2.75( 72.92%) f 0.01( 0.21%)g  
 0.00( 0.02%)  
 ( 91.49%) 0.9565\* P 1 s( 35.65%)p 1.80( 64.32%)d 0.00( 0.02%)  
 (0.92500) BD ( 1)Yb 2- P 2  
 ( 8.21%) 0.2865\*Yb 1 s( 26.16%)p 0.01( 0.28%)d 2.80( 73.35%) f 0.01( 0.19%)g  
 0.00( 0.02%)  
 ( 91.79%) 0.9581\* P 2 s( 35.49%)p 1.82( 64.48%)d 0.00( 0.03%)

**Table S12** NBO Second order perturbation analysis for complex **4** (dispersion).

| Donor NBO | Acceptor NBO | E(2)<br>kcal/mol |
|-----------|--------------|------------------|
|-----------|--------------|------------------|

|                                                                     |                                                                                                                                                                                                        |       |
|---------------------------------------------------------------------|--------------------------------------------------------------------------------------------------------------------------------------------------------------------------------------------------------|-------|
| (0.78188) LP ( 1) P 4<br>s( 1.78%)p55.04( 98.21%)d<br>0.00( 0.01%)  | (0.10239) LV ( 1)Yb 3<br>s( 0.45%)p<br>0.15( 0.07%)d99.99( 99.41%) f<br>0.14( 0.06%)g 0.01( 0.00%)                                                                                                     | 8.59  |
| (0.78188) LP ( 1) P 4<br>s( 1.78%)p55.04( 98.21%)d<br>0.00( 0.01%)  | (0.13059) LV ( 1)Yb 5<br>s( 0.42%)p<br>0.05( 0.02%)d99.99( 99.47%) f<br>0.20( 0.08%)g 0.01( 0.01%)                                                                                                     | 8.82  |
| (0.78188) LP ( 1) P 4<br>s( 1.78%)p55.04( 98.21%)d<br>0.00( 0.01%)  | (0.10058) LV ( 1)Yb 2<br>s( 33.70%)p 0.00( 0.03%)d<br>1.96( 66.19%)f 0.00( 0.06%)g<br>0.00( 0.01%)                                                                                                     | 18.05 |
| (0.78188) LP ( 1) P 4<br>s( 1.78%)p55.04( 98.21%)d<br>0.00( 0.01%)  | (0.05643) LV ( 4)Yb 2<br>s( 0.19%)p<br>0.14( 0.03%)d99.99( 99.68%)f<br>0.46( 0.09%)g 0.09( 0.02%)                                                                                                      | 7.24  |
| (0.79533) LP ( 1) P 3<br>s( 1.94%)p50.56( 98.06%)d<br>0.00( 0.00%)  | (0.10239) LV ( 1)Yb 3<br>s( 0.45%)p<br>0.15( 0.07%)d99.99( 99.41%) f<br>0.14( 0.06%)g 0.01( 0.00%)                                                                                                     | 11.03 |
| (0.79533) LP ( 1) P 3<br>s( 1.94%)p50.56( 98.06%)d<br>0.00( 0.00%)  | (0.13059) LV ( 1)Yb 5<br>s( 0.42%)p<br>0.05( 0.02%)d99.99( 99.47%) f<br>0.20( 0.08%)g 0.01( 0.01%)                                                                                                     | 13.62 |
| (0.79533) LP ( 1) P 3<br>s( 1.94%)p50.56( 98.06%)d<br>0.00( 0.00%)  | (0.06873) LV ( 1)Yb 4<br>s( 0.05%)p<br>0.78( 0.04%)d99.99( 99.85%) f<br>1.02( 0.05%)g 0.04( 0.00%)                                                                                                     | 8.32  |
| (0.80028) LP ( 1) P 1<br>s( 48.32%)p 1.07( 51.65%)d<br>0.00( 0.03%) | (0.10413) BD*( 1)Yb 3- P 5<br>( 89.22%) 0.9446*Yb 3<br>s( 34.20%)p 0.00( 0.14%)d<br>1.92( 65.55%) f 0.00( 0.09%)g<br>0.00( 0.01%)<br>( 10.78%) -0.3283* P 5 s( 59.50%)p<br>0.68( 40.47%)d 0.00( 0.04%) | 72.09 |
| (0.88670) LP ( 1) P 5<br>s( 3.00%)p32.27( 96.98%)d<br>0.01( 0.02%)  | (0.10239) LV ( 1)Yb 3<br>s( 0.45%)p<br>0.15( 0.07%)d99.99( 99.41%) f<br>0.14( 0.06%)g 0.01( 0.00%)                                                                                                     | 9.18  |
| (0.88670) LP ( 1) P 5<br>s( 3.00%)p32.27( 96.98%)d<br>0.01( 0.02%)  | (0.09614) LV ( 2)Yb 5<br>s( 2.52%)p<br>0.03( 0.07%)d38.56( 97.34%)f<br>0.03( 0.06%)g 0.00( 0.00%)                                                                                                      | 13.31 |

|                                                                                                                                                                                                          |                                                                                                                                                                                                       |       |
|----------------------------------------------------------------------------------------------------------------------------------------------------------------------------------------------------------|-------------------------------------------------------------------------------------------------------------------------------------------------------------------------------------------------------|-------|
| (0.88670) LP ( 1) P 5<br>s( 3.00%)p32.27( 96.98%)d<br>0.01( 0.02%)                                                                                                                                       | (0.09419) BD*( 1)Yb 5- P 6<br>( 90.70%) 0.9523*Yb 5<br>s( 19.62%)p 0.01( 0.11%)d<br>4.09( 80.15%) f 0.01( 0.10%)g<br>0.00( 0.01%)<br>( 9.30%) -0.3050* P 6 s( 31.12%)p<br>2.21( 68.85%)d 0.00( 0.03%) | 20.30 |
| (0.89146) BD ( 1)Yb 3- P 4<br>( 11.12%) 0.3335*Yb 3<br>s( 28.38%)p 0.00( 0.08%)d<br>2.52( 71.39%) f 0.00( 0.14%)g<br>0.00( 0.01%)<br>( 88.88%) 0.9428* P 4<br>s( 37.05%)p 1.70( 62.92%)d<br>0.00( 0.03%) | (0.13059) LV ( 1)Yb 5<br>s( 0.42%)p<br>0.05( 0.02%)d99.99( 99.47%) f<br>0.20( 0.08%)g 0.01( 0.01%)                                                                                                    | 14.24 |
| (0.89146) BD ( 1)Yb 3- P 4<br>( 11.12%) 0.3335*Yb 3<br>s( 28.38%)p 0.00( 0.08%)d<br>2.52( 71.39%) f 0.00( 0.14%)g<br>0.00( 0.01%)<br>( 88.88%) 0.9428* P 4<br>s( 37.05%)p 1.70( 62.92%)d<br>0.00( 0.03%) | (0.09614) LV ( 2)Yb 5<br>s( 2.52%)p<br>0.03( 0.07%)d38.56( 97.34%)f<br>0.03( 0.06%)g 0.00( 0.00%)                                                                                                     | 14.28 |
| (0.89146) BD ( 1)Yb 3- P 4<br>( 11.12%) 0.3335*Yb 1<br>s( 28.38%)p 0.00( 0.08%)d<br>2.52( 71.39%) f 0.00( 0.14%)g<br>0.00( 0.01%)<br>( 88.88%) 0.9428* P 4<br>s( 37.05%)p 1.70( 62.92%)d<br>0.00( 0.03%) | (0.09060) LV ( 3)Yb 5<br>s( 65.35%)p 0.00( 0.09%)d<br>0.53( 34.49%)f 0.00( 0.06%)g<br>0.00( 0.01%)                                                                                                    | 8.44  |
| (0.89146) BD ( 1)Yb 3- P 4<br>( 11.12%) 0.3335*Yb 3<br>s( 28.38%)p 0.00( 0.08%)d<br>2.52( 71.39%) f 0.00( 0.14%)g<br>0.00( 0.01%)<br>( 88.88%) 0.9428* P 4<br>s( 37.05%)p 1.70( 62.92%)d<br>0.00( 0.03%) | (0.10058) LV ( 1)Yb 2<br>s( 33.70%)p 0.00( 0.03%)d<br>1.96( 66.19%)f 0.00( 0.06%)g<br>0.00( 0.01%)                                                                                                    | 7.64  |
| (0.92690) BD ( 1)Yb 3- P 5<br>( 10.78%) 0.3283*Yb 3<br>s( 34.20%)p 0.00( 0.14%)d<br>1.92( 65.55%) f 0.00( 0.09%)g                                                                                        | (0.09419) BD*( 1)Yb 5- P 6<br>( 90.70%) 0.9523*Yb 5<br>s( 19.62%)p 0.01( 0.11%)d<br>4.09( 80.15%) f 0.01( 0.10%)g                                                                                     | 57.28 |

|                                                                                                                                                                                                         |                                                                                                                                                                                                        |       |
|---------------------------------------------------------------------------------------------------------------------------------------------------------------------------------------------------------|--------------------------------------------------------------------------------------------------------------------------------------------------------------------------------------------------------|-------|
| 0.00( 0.01%)<br>( 89.22%) 0.9446* P 5<br>s( 59.50%)p 0.68( 40.47%)d<br>0.00( 0.04%)                                                                                                                     | 0.00( 0.01%)<br>( 9.30%) -0.3050* P 6 s( 31.12%)p<br>2.21( 68.85%)d 0.00( 0.03%)                                                                                                                       |       |
| (0.94500) BD ( 1)Yb 5- P 6<br>( 9.30%) 0.3050*Yb 5<br>s( 19.62%)p 0.01( 0.11%)d<br>4.09( 80.15%) f 0.01( 0.10%)g<br>0.00( 0.01%)<br>( 90.70%) 0.9523* P 6<br>s( 31.12%)p 2.21( 68.85%)d<br>0.00( 0.03%) | (0.05391) BD*( 1)Yb 4- P 2<br>( 93.82%) 0.9686*Yb 4<br>s( 8.65%)p<br>0.06( 0.54%)d10.45( 90.36%)f<br>0.05( 0.43%)g 0.00( 0.02%)<br>( 6.18%) -0.2486* P 2<br>s( 44.32%)p 1.26( 55.65%)d<br>0.00( 0.03%) | 11.30 |
| (0.88647) BD ( 1)Yb 4- P 4<br>( 9.86%) 0.3140*Yb 4<br>s( 31.54%)p 0.01( 0.21%)d<br>2.16( 68.08%) f 0.00( 0.15%)g<br>0.00( 0.02%)<br>( 90.14%) 0.9494* P 4<br>s( 43.78%)p 1.28( 56.19%)d<br>0.00( 0.03%) | (0.09060) LV ( 3)Yb 5<br>s( 65.35%)p 0.00( 0.09%)d<br>0.53( 34.49%)f 0.00( 0.06%)g<br>0.00( 0.01%)                                                                                                     | 13.55 |
| (0.88647) BD ( 1)Yb 4- P 4<br>( 9.86%) 0.3140*Yb 4<br>s( 31.54%)p 0.01( 0.21%)d<br>2.16( 68.08%) f 0.00( 0.15%)g<br>0.00( 0.02%)<br>( 90.14%) 0.9494* P 4<br>s( 43.78%)p 1.28( 56.19%)d<br>0.00( 0.03%) | (0.13059) LV ( 1)Yb 5<br>s( 0.42%)p<br>0.05( 0.02%)d99.99( 99.47%) f<br>0.20( 0.08%)g 0.01( 0.01%)                                                                                                     | 9.60  |
| (0.88647) BD ( 1)Yb 4- P 4<br>( 9.86%) 0.3140*Yb 4<br>s( 31.54%)p 0.01( 0.21%)d<br>2.16( 68.08%) f 0.00( 0.15%)g<br>0.00( 0.02%)<br>( 90.14%) 0.9494* P 4<br>s( 43.78%)p 1.28( 56.19%)d<br>0.00( 0.03%) | (0.10058) LV ( 1)Yb 2<br>s( 33.70%)p 0.00( 0.03%)d<br>1.96( 66.19%)f 0.00( 0.06%)g<br>0.00( 0.01%)                                                                                                     | 14.12 |
| (0.88647) BD ( 1)Yb 4- P 4<br>( 9.86%) 0.3140*Yb 4<br>s( 31.54%)p 0.01( 0.21%)d<br>2.16( 68.08%) f 0.00( 0.15%)g<br>0.00( 0.02%)<br>( 90.14%) 0.9494* P 4<br>s( 43.78%)p 1.28( 56.19%)d                 | (0.09147) LV ( 2)Yb 2<br>s( 15.55%)p 0.00( 0.08%)d<br>5.42( 84.27%) f 0.01( 0.09%)g<br>0.00( 0.01%)                                                                                                    | 6.71  |

|                                                                                                                                                                                                         |                                                                                                                                                                                                       |       |
|---------------------------------------------------------------------------------------------------------------------------------------------------------------------------------------------------------|-------------------------------------------------------------------------------------------------------------------------------------------------------------------------------------------------------|-------|
| 0.00( 0.03%)                                                                                                                                                                                            |                                                                                                                                                                                                       |       |
| (0.88176) BD ( 1)Yb 4- P 3<br>( 9.66%) 0.3108*Yb 4<br>s( 31.05%)p 0.00( 0.08%)d<br>2.21( 68.75%) f 0.00( 0.11%)g<br>0.00( 0.01%)<br>( 90.34%) 0.9505* P 3<br>s( 40.67%)p 1.46( 59.30%)d<br>0.00( 0.03%) | (0.09060) LV ( 3)Yb 5<br>s( 65.35%)p 0.00( 0.09%)d<br>0.53( 34.49%)f 0.00( 0.06%)g<br>0.00( 0.01%)                                                                                                    | 16.33 |
| (0.88176) BD ( 1)Yb 4- P 3<br>( 9.66%) 0.3108*Yb 4<br>s( 31.05%)p 0.00( 0.08%)d<br>2.21( 68.75%) f 0.00( 0.11%)g<br>0.00( 0.01%)<br>( 90.34%) 0.9505* P 3<br>s( 40.67%)p 1.46( 59.30%)d<br>0.00( 0.03%) | (0.13059) LV ( 1)Yb 5<br>s( 0.42%)p<br>0.05( 0.02%)d99.99( 99.47%) f<br>0.20( 0.08%)g 0.01( 0.01%)                                                                                                    | 8.64  |
| (0.88027) BD ( 1)Yb 4- P 3<br>( 6.18%) 0.2486*Yb 4<br>s( 8.65%)p<br>0.06( 0.54%)d10.45( 90.36%) f<br>0.05( 0.43%)g 0.00( 0.02%)<br>( 93.82%) 0.9686* P 3<br>s( 44.32%)p 1.26( 55.65%)d<br>0.00( 0.03%)  | (0.08570) BD*( 1)Yb 4- P 6<br>( 92.35%) 0.9610*Yb 4<br>s( 24.39%)p 0.03( 0.65%)d<br>3.06( 74.58%) f 0.01( 0.36%)g<br>0.00( 0.01%)<br>( 7.65%) -0.2766* P 6 s( 30.78%)p<br>2.25( 69.20%)d 0.00( 0.02%) | 13.05 |
| (0.91230) BD ( 1)Yb 4- P 6<br>( 7.65%) 0.2766*Yb 4<br>s( 24.39%)p 0.03( 0.65%)d<br>3.06( 74.58%) f 0.01( 0.36%)g<br>0.00( 0.01%)<br>( 92.35%) 0.9610* P 6<br>s( 30.78%)p 2.25( 69.20%)d<br>0.00( 0.02%) | (0.09614) LV ( 2)Yb 5<br>s( 2.52%)p<br>0.03( 0.07%)d38.56( 97.34%)f<br>0.03( 0.06%)g 0.00( 0.00%)                                                                                                     | 7.53  |
| (0.91230) BD ( 1)Yb 4- P 6<br>( 7.65%) 0.2766*Yb 4<br>s( 24.39%)p 0.03( 0.65%)d<br>3.06( 74.58%) f 0.01( 0.36%)g<br>0.00( 0.01%)<br>( 92.35%) 0.9610* P 6<br>s( 30.78%)p 2.25( 69.20%)d<br>0.00( 0.02%) | (0.09419) BD*( 1)Yb 5- P 6<br>( 90.70%) 0.9523*Yb 5<br>s( 19.62%)p 0.01( 0.11%)d<br>4.09( 80.15%) f 0.01( 0.10%)g<br>0.00( 0.01%)<br>( 9.30%) -0.3050* P 6 s( 31.12%)p<br>2.21( 68.85%)d 0.00( 0.03%) | 8.54  |
| (0.90240) BD ( 1)Yb 2- P 2<br>( 10.88%) 0.3298*Yb 2                                                                                                                                                     | (0.08570) BD*( 1)Yb 4- P 6<br>( 92.35%) 0.9610*Yb 4                                                                                                                                                   | 27.75 |

|                                                                                                                                                                                                          |                                                                                                                                                |       |
|----------------------------------------------------------------------------------------------------------------------------------------------------------------------------------------------------------|------------------------------------------------------------------------------------------------------------------------------------------------|-------|
| s( 18.32%)p 0.01( 0.14%)d<br>4.44( 81.40%) f 0.01( 0.13%)g<br>0.00( 0.01%)<br>( 89.12%) 0.9440* P 2<br>s( 34.84%)p 1.87( 65.13%)d<br>0.00( 0.03%)                                                        | s( 24.39%)p 0.03( 0.65%)d<br>3.06( 74.58%) f 0.01( 0.36%)g<br>0.00( 0.01%)<br>( 7.65%) -0.2766* P 6 s( 30.78%)p<br>2.25( 69.20%)d 0.00( 0.02%) |       |
| (0.80028) LP ( 1) P 1<br>s( 48.32%)p 1.07( 51.65%)d<br>0.00( 0.03%)                                                                                                                                      | (0.11165) LV ( 1)Yb 1<br>s( 3.91%)p<br>0.03( 0.10%)d24.53( 95.86%)f<br>0.03( 0.12%)g 0.00( 0.01%)                                              | 11.68 |
| (0.80028) LP ( 1) P 1<br>s( 48.32%)p 1.07( 51.65%)d<br>0.00( 0.03%)                                                                                                                                      | (0.10475) LV ( 2)Yb 1<br>s( 1.06%)p<br>0.15( 0.16%)d93.24( 98.67%)f<br>0.10( 0.10%)g 0.01( 0.01%)                                              | 12.05 |
| (0.88787) BD ( 1)Yb 3- P 3<br>( 10.95%) 0.3310*Yb 3<br>s( 33.39%)p 0.00( 0.10%)d<br>1.99( 66.36%) f 0.00( 0.13%)g<br>0.00( 0.02%)<br>( 89.05%) 0.9436* P 3<br>s( 39.21%)p 1.55( 60.76%)d<br>0.00( 0.04%) | (0.11165) LV ( 1)Yb 1<br>s( 3.91%)p<br>0.03( 0.10%)d24.53( 95.86%)f<br>0.03( 0.12%)g 0.00( 0.01%)                                              | 8.25  |
| (0.88787) BD ( 1)Yb 3- P 3<br>( 10.95%) 0.3310*Yb 3<br>s( 33.39%)p 0.00( 0.10%)d<br>1.99( 66.36%) f 0.00( 0.13%)g<br>0.00( 0.02%)<br>( 89.05%) 0.9436* P 3<br>s( 39.21%)p 1.55( 60.76%)d<br>0.00( 0.04%) | (0.07962) LV ( 3)Yb 1<br>s( 84.79%)p 0.00( 0.02%)d<br>0.18( 15.02%)f 0.00( 0.15%)g<br>0.00( 0.02%)                                             | 9.37  |
| (0.88176) BD ( 1)Yb 4- P 3<br>( 9.66%) 0.3108*Yb 4<br>s( 31.05%)p 0.00( 0.08%)d<br>2.21( 68.75%) f 0.00( 0.11%)g<br>0.00( 0.01%)<br>( 90.34%) 0.9505* P 3<br>s( 40.67%)p 1.46( 59.30%)d<br>0.00( 0.03%)  | (0.11165) LV ( 1)Yb 1<br>s( 3.91%)p<br>0.03( 0.10%)d24.53( 95.86%)f<br>0.03( 0.12%)g 0.00( 0.01%)                                              | 8.92  |
| (0.88176) BD ( 1)Yb 4- P 3<br>( 9.66%) 0.3108*Yb 4<br>s( 31.05%)p 0.00( 0.08%)d<br>2.21( 68.75%) f 0.00( 0.11%)g<br>0.00( 0.01%)                                                                         | (0.07962) LV ( 3)Yb 1<br>s( 84.79%)p 0.00( 0.02%)d<br>0.18( 15.02%)f 0.00( 0.15%)g<br>0.00( 0.02%)                                             | 9.14  |

|                                                                                                                                                                                                          |                                                                                                                                                                                                          |       |
|----------------------------------------------------------------------------------------------------------------------------------------------------------------------------------------------------------|----------------------------------------------------------------------------------------------------------------------------------------------------------------------------------------------------------|-------|
| ( 90.34%) 0.9505* P 3<br>s( 40.67%)p 1.46( 59.30%)d<br>0.00( 0.03%)                                                                                                                                      |                                                                                                                                                                                                          |       |
| (0.88027) BD ( 1)Yb 4- P 2<br>( 6.18%) 0.2486*Yb 4<br>s( 8.65%)p<br>0.06( 0.54%)d10.45( 90.36%) f<br>0.05( 0.43%)g 0.00( 0.02%)<br>( 93.82%) 0.9686* P 2<br>s( 44.32%)p 1.26( 55.65%)d<br>0.00( 0.03%)   | (0.10475) LV ( 2)Yb 1<br>s( 1.06%)p<br>0.15( 0.16%)d93.24( 98.67%)f<br>0.10( 0.10%)g 0.01( 0.01%)                                                                                                        | 20.97 |
| (0.90240) BD ( 1)Yb 2- P 2<br>( 10.88%) 0.3298*Yb 2<br>s( 18.32%)p 0.01( 0.14%)d<br>4.44( 81.40%) f 0.01( 0.13%)g<br>0.00( 0.01%)<br>( 89.12%) 0.9440* P 2<br>s( 34.84%)p 1.87( 65.13%)d<br>0.00( 0.03%) | (0.10475) LV ( 2)Yb 1<br>s( 1.06%)p<br>0.15( 0.16%)d93.24( 98.67%)f<br>0.10( 0.10%)g 0.01( 0.01%)                                                                                                        | 8.77  |
| (0.96087) LP ( 2) O 3<br>s( 38.14%)p 1.62( 61.85%)d<br>0.00( 0.02%)                                                                                                                                      | (0.09147) LV ( 2)Yb 2<br>s( 15.55%)p 0.00( 0.08%)d<br>5.42( 84.27%) f 0.01( 0.09%)g<br>0.00( 0.01%)                                                                                                      | 9.06  |
| (0.96087) LP ( 2) O 3<br>s( 38.14%)p 1.62( 61.85%)d<br>0.00( 0.02%)                                                                                                                                      | (0.05643) LV ( 4)Yb 2<br>s( 0.19%)p<br>0.14( 0.03%)d99.99( 99.68%)f<br>0.46( 0.09%)g 0.09( 0.02%)                                                                                                        | 12.12 |
| (0.95963) LP ( 2) O 4<br>s( 36.37%)p 1.75( 63.61%)d<br>0.00( 0.02%)                                                                                                                                      | (0.03564) BD*( 1)Yb 4- P 3<br>( 90.34%) 0.9505*Yb 4<br>s( 31.05%)p 0.00( 0.08%)d<br>2.21( 68.75%) f 0.00( 0.11%)g<br>0.00( 0.01%)<br>( 9.66%) -0.3108* P 3<br>s( 40.67%)p 1.46( 59.30%)d<br>0.00( 0.03%) | 12.42 |
| (0.96029) LP ( 1) O 5<br>s( 40.18%)p 1.49( 59.80%)d<br>0.00( 0.02%)                                                                                                                                      | (0.13059) LV ( 1)Yb 5<br>s( 0.42%)p<br>0.05( 0.02%)d99.99( 99.47%) f<br>0.20( 0.08%)g 0.01( 0.01%)                                                                                                       | 16.25 |
| (0.96409) LP ( 2) O 2<br>s( 25.02%)p 3.00( 74.96%)d<br>0.00( 0.02%)                                                                                                                                      | (0.11165) LV ( 1)Yb 1<br>s( 3.91%)p<br>0.03( 0.10%)d24.53( 95.86%)f<br>0.03( 0.12%)g 0.00( 0.01%)                                                                                                        | 8.17  |

|                                                                                |                                                                                                                 |             |
|--------------------------------------------------------------------------------|-----------------------------------------------------------------------------------------------------------------|-------------|
| <p>(0.96409) LP ( 2) O 2<br/> s( 25.02%)p 3.00( 74.96%)d<br/> 0.00( 0.02%)</p> | <p>(0.07962) LV ( 3)Yb 1<br/> s( 84.79%)p 0.00( 0.02%)d<br/> 0.18( 15.02%)f 0.00( 0.15%)g<br/> 0.00( 0.02%)</p> | <p>6.10</p> |
|--------------------------------------------------------------------------------|-----------------------------------------------------------------------------------------------------------------|-------------|

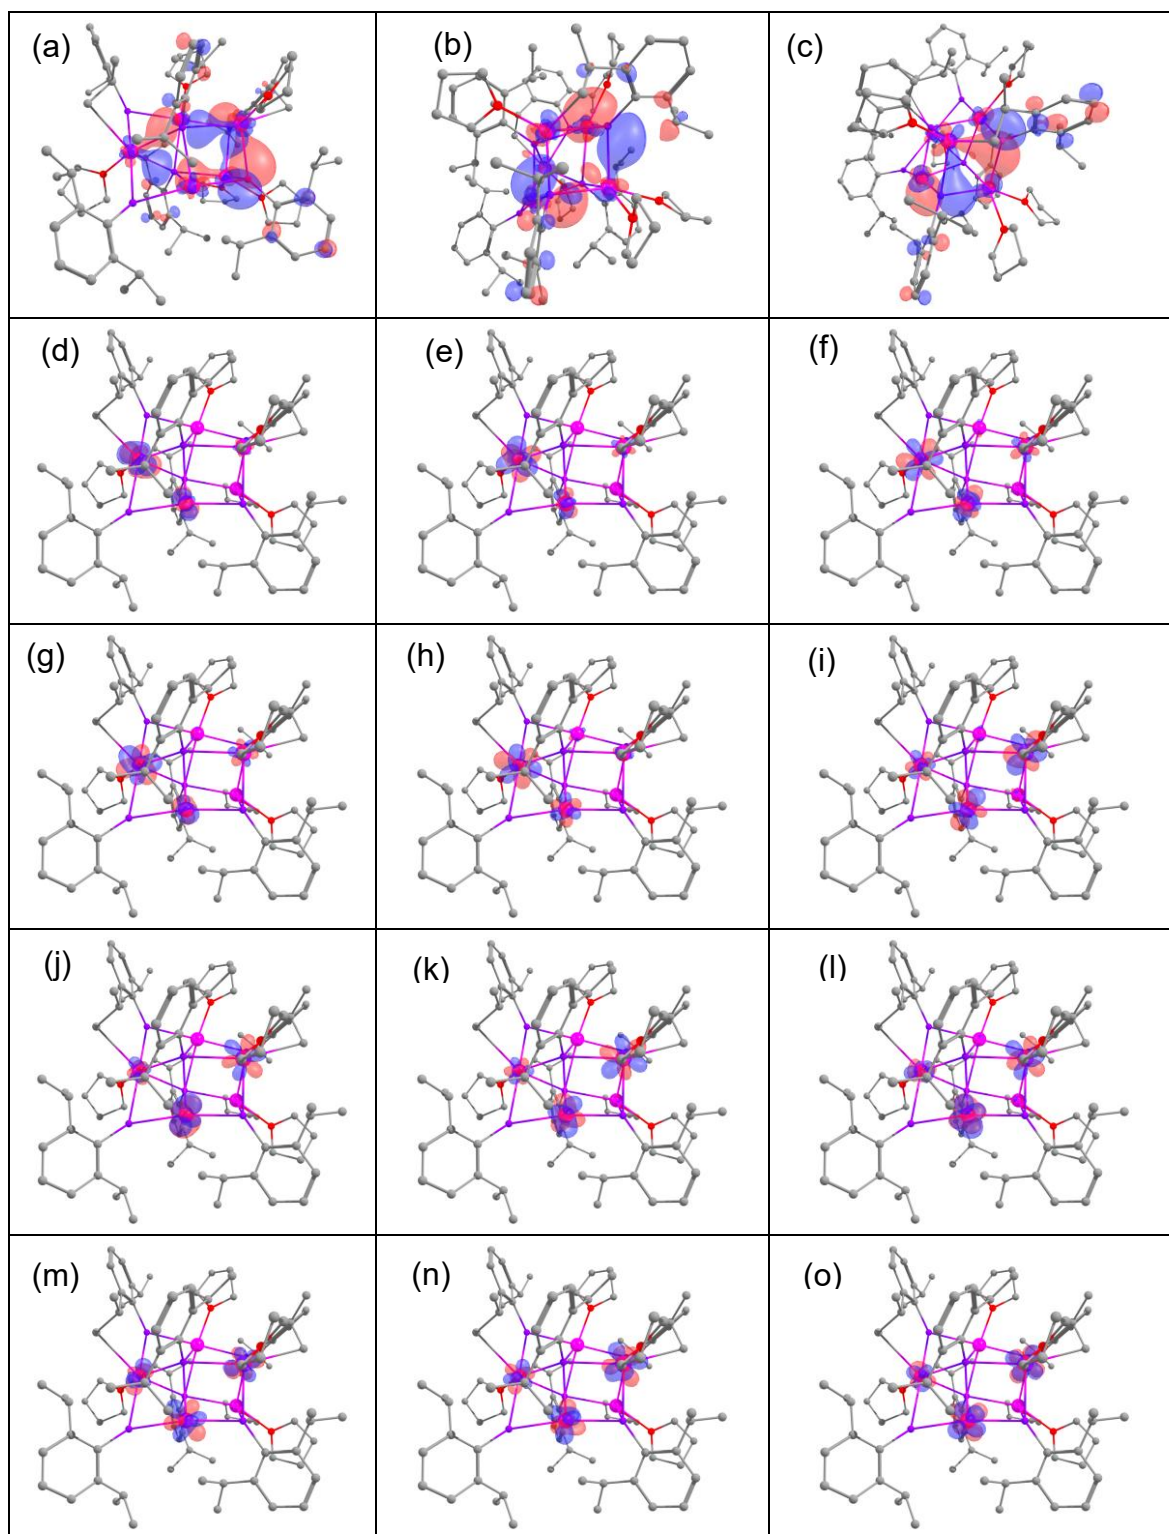

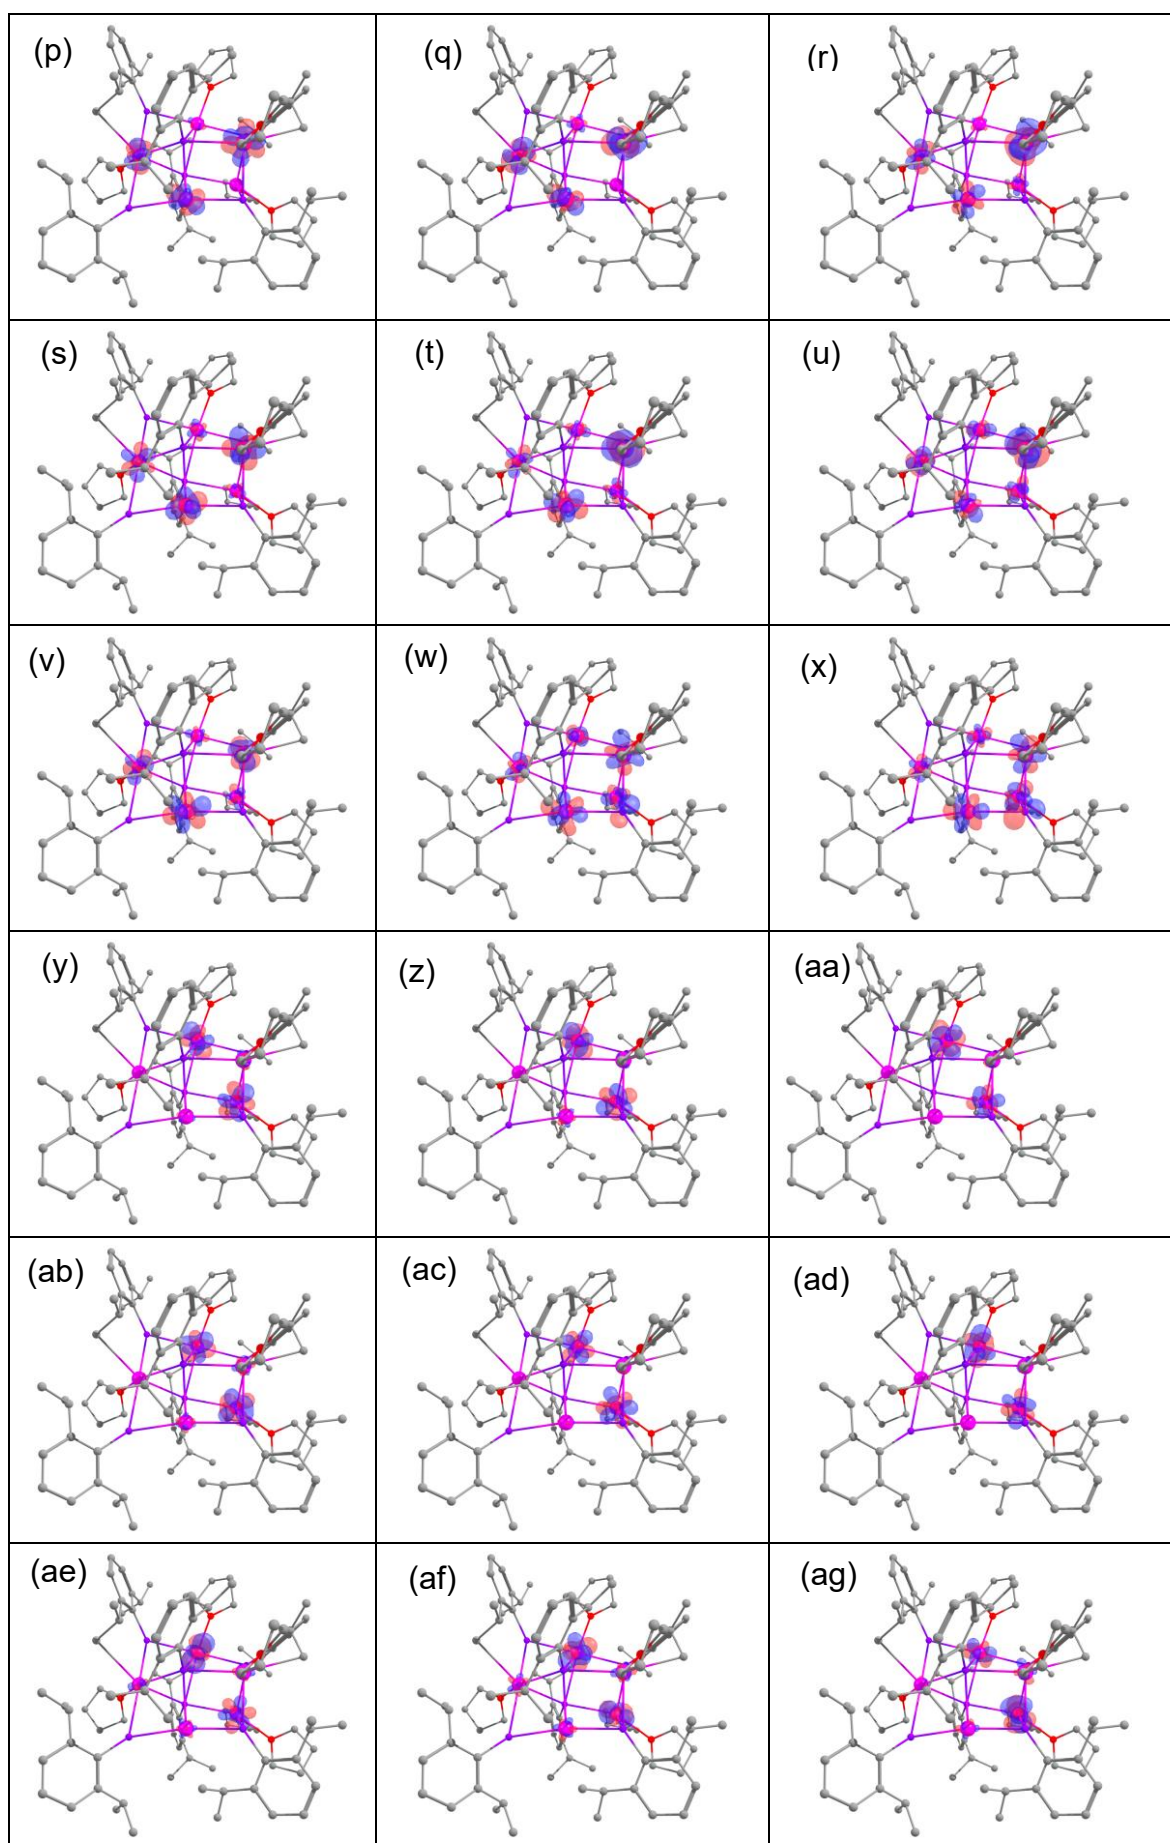

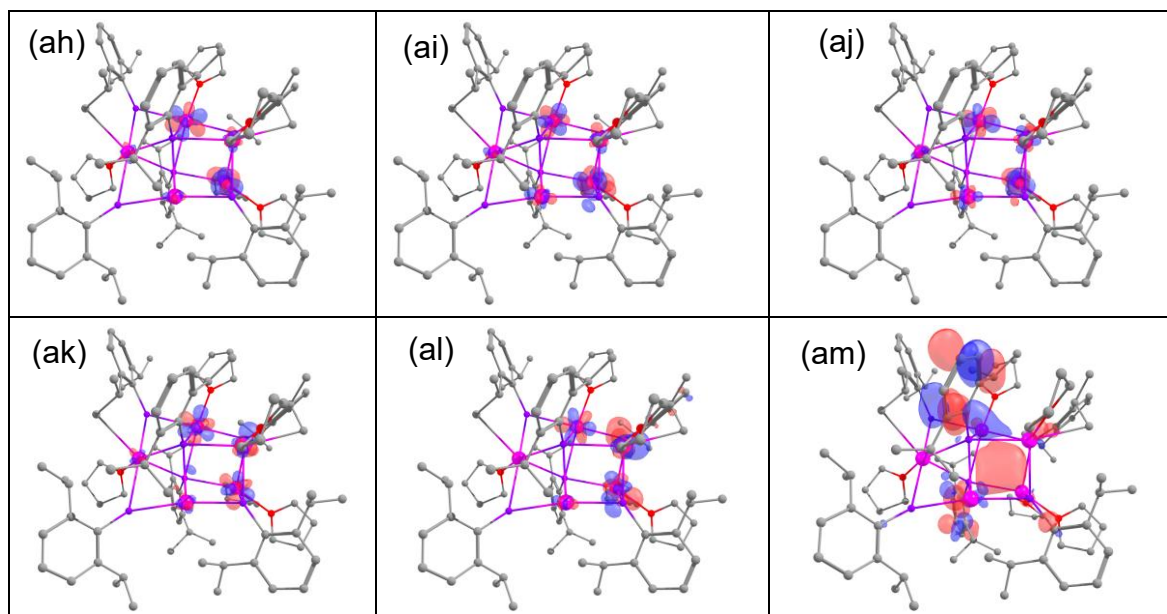

**Fig. S54** Computed MOs for complex **4** (dispersion). (a)HOMO-37 (b)HOMO-36 (c)HOMO-35 (d)HOMO-34 (e)HOMO-33 (f)HOMO-32 (g)HOMO-31 (h)HOMO-30 (i)HOMO-29 (j)HOMO-28 (k)HOMO-27 (l)HOMO-26 (m)HOMO-25 (n)HOMO-24 (o)HOMO-23 (p)HOMO-22 (q)HOMO-21 (r)HOMO-20 (s)HOMO-19 (t)HOMO-18 (u)HOMO-17 (v)HOMO-16 (w)HOMO-15 (x)HOMO-14 (y)HOMO-13 (z)HOMO-12 (aa)HOMO-11 (ab)HOMO-10 (ac)HOMO-9 (ad)HOMO-8 (ae)HOMO-7 (af)HOMO-6 (ag)HOMO-5 (ah)HOMO-4 (ai)HOMO-3 (aj)HOMO-2 (ak)HOMO-1 (al)HOMO (am)LUMO.

**Table S13** NBO analysis of canonical molecular orbitals for complex **4** (dispersion).

|                                                        |                                        |
|--------------------------------------------------------|----------------------------------------|
| MO 451 (occ): orbital energy = -0.14888 a.u. (HOMO-37) | (0.79533) LP ( 1) P 3                  |
| -0.328*[199]: LP ( 1) P 3(lp)                          | s( 1.94%)p50.56( 98.06%)d 0.00( 0.00%) |
| -0.318*[198]: LP ( 1) P 4(lp)                          | (0.78188) LP ( 1) P 4                  |
| 0.283*[222]: BD ( 1)Yb 2- P                            | s( 1.78%)p55.04( 98.21%)d 0.00( 0.01%) |
| 1                                                      | (0.92718) BD ( 1)Yb 2- P 1             |
| 0.274*[227]: BD ( 2) P 1- C1                           | ( 9.98%) 0.3160*Yb 2 s( 23.72%)p       |
| -0.236*[229]: BD ( 2) P 2- C13                         | 0.01( 0.28%)d 3.19( 75.77%) f          |
|                                                        | 0.01( 0.20%)g 0.00( 0.02%)             |
|                                                        | ( 90.02%) 0.9488* P 1 s( 26.99%)p      |
|                                                        | 2.70( 72.99%)d 0.00( 0.02%)            |
|                                                        | (0.88173) BD ( 2) P 1- C 1             |
|                                                        | ( 81.30%) 0.9017* P 1                  |
|                                                        | s( 0.27%)p99.99( 99.71%)d 0.06( 0.02%) |
|                                                        | ( 18.70%) 0.4325* C 1 s( 0.00%)p       |
|                                                        | 1.00( 99.95%)d 0.00( 0.05%)            |
|                                                        | (0.89241) BD ( 2) P 2- C 13            |

|                                                                                                                                                                                                                                                                   |                                                                                                                                                                                                                                                                                                                                                                                                                                                                                                                                                                                                                                                                                                                                                                                                                                                                                                                                                                                          |
|-------------------------------------------------------------------------------------------------------------------------------------------------------------------------------------------------------------------------------------------------------------------|------------------------------------------------------------------------------------------------------------------------------------------------------------------------------------------------------------------------------------------------------------------------------------------------------------------------------------------------------------------------------------------------------------------------------------------------------------------------------------------------------------------------------------------------------------------------------------------------------------------------------------------------------------------------------------------------------------------------------------------------------------------------------------------------------------------------------------------------------------------------------------------------------------------------------------------------------------------------------------------|
|                                                                                                                                                                                                                                                                   | ( 83.15%) 0.9119* P 2<br>s( 0.29%)p99.99( 99.70%)d 0.02( 0.00%)<br>( 16.85%) 0.4105* C 13<br>s( 0.03%)p99.99( 99.92%)d 1.77( 0.05%)                                                                                                                                                                                                                                                                                                                                                                                                                                                                                                                                                                                                                                                                                                                                                                                                                                                      |
| MO 452 (occ): orbital energy = -0.14493<br>a.u. (HOMO-36)<br>2<br>0.430*[223]: BD ( 1)Yb 2- P<br>-0.387*[220]: BD ( 1)Yb 4- P 2<br>-0.253*[229]: BD ( 2) P 2- C13<br>-0.251*[227]: BD ( 2) P 1- C1<br>-0.240*[222]: BD ( 1)Yb 2- P 1                              | <u>(0.90240) BD ( 1)Yb 2- P 2</u><br>( 10.88%) 0.3298*Yb 2 s( 18.32%)p<br>0.01( 0.14%)d 4.44( 81.40%) f<br>0.01( 0.13%)g 0.00( 0.01%)<br>( 89.12%) 0.9440* P 2 s( 34.84%)p<br>1.87( 65.13%)d 0.00( 0.03%)<br><u>(0.88027) BD ( 1)Yb 4- P 2</u><br>( 6.18%) 0.2486*Yb 4 s( 8.65%)p<br>0.06( 0.54%)d10.45( 90.36%) f<br>0.05( 0.43%)g 0.00( 0.02%)<br>( 93.82%) 0.9686* P 2 s( 44.32%)p<br>1.26( 55.65%)d 0.00( 0.03%)<br><u>(0.89241) BD ( 2) P 2- C 13</u><br>( 83.15%) 0.9119* P 2<br>s( 0.29%)p99.99( 99.70%)d 0.02( 0.00%)<br>( 16.85%) 0.4105* C 13<br>s( 0.03%)p99.99( 99.92%)d 1.77( 0.05%)<br><u>(0.88173) BD ( 2) P 1- C 1</u><br>( 81.30%) 0.9017* P 1<br>s( 0.27%)p99.99( 99.71%)d 0.06( 0.02%)<br>( 18.70%) 0.4325* C 1 s( 0.00%)p<br>1.00( 99.95%)d 0.00( 0.05%)<br><u>(0.92718) BD ( 1)Yb 2- P 1</u><br>( 9.98%) 0.3160*Yb 2 s( 23.72%)p<br>0.01( 0.28%)d 3.19( 75.77%) f<br>0.01( 0.20%)g 0.00( 0.02%)<br>( 90.02%) 0.9488* P 1 s( 26.99%)p<br>2.70( 72.99%)d 0.00( 0.02%) |
| MO 453 (occ): orbital energy = -0.13978<br>a.u. (HOMO-35)<br>C13<br>0.346*[229]: BD ( 2) P 2-<br>0.300*[227]: BD ( 2) P 1- C1<br>0.259*[191]: LP ( 1)Yb 2(lp)<br>0.226*[194]: LP ( 4)Yb 2(lp)<br>-0.225*[222]: BD ( 1)Yb 2- P 1<br>-0.224*[220]: BD ( 1)Yb 4- P 2 | <u>(0.89241) BD ( 2) P 2- C 13</u><br>( 83.15%) 0.9119* P 2<br>s( 0.29%)p99.99( 99.70%)d 0.02( 0.00%)<br>( 16.85%) 0.4105* C 13<br>s( 0.03%)p99.99( 99.92%)d 1.77( 0.05%)<br><u>(0.88173) BD ( 2) P 1- C 1</u><br>( 81.30%) 0.9017* P 1<br>s( 0.27%)p99.99( 99.71%)d 0.06( 0.02%)<br>( 18.70%) 0.4325* C 1 s( 0.00%)p<br>1.00( 99.95%)d 0.00( 0.05%)<br><u>(0.99898) LP ( 1)Yb 2</u>                                                                                                                                                                                                                                                                                                                                                                                                                                                                                                                                                                                                     |

|  |                                                                                                                                                                                                                                                                                                                                                                                                                                                                                                                                                                                                                                                   |
|--|---------------------------------------------------------------------------------------------------------------------------------------------------------------------------------------------------------------------------------------------------------------------------------------------------------------------------------------------------------------------------------------------------------------------------------------------------------------------------------------------------------------------------------------------------------------------------------------------------------------------------------------------------|
|  | <p>s( 0.00%)p 0.00( 0.00%)d 0.00( 0.01%)f<br/> 1.00( 99.99%)g 0.00( 0.00%)<br/> <u>(0.99796) LP ( 4)Yb 2</u><br/> s( 0.01%)p 0.00( 0.00%)d<br/> 1.00( 0.03%)f99.99( 99.96%)g<br/> 0.01( 0.00%)<br/> <u>(0.92718) BD ( 1)Yb 2- P 1</u><br/> ( 9.98%) 0.3160*Yb 2 s( 23.72%)p<br/> 0.01( 0.28%)d 3.19( 75.77%) f<br/> 0.01( 0.20%)g 0.00( 0.02%)<br/> ( 90.02%) 0.9488* P 1 s( 26.99%)p<br/> 2.70( 72.99%)d 0.00( 0.02%)<br/> <u>(0.88027) BD ( 1)Yb 4- P 2</u><br/> ( 6.18%) 0.2486*Yb 4 s( 8.65%)p<br/> 0.06( 0.54%)d10.45( 90.36%) f<br/> 0.05( 0.43%)g 0.00( 0.02%)<br/> ( 93.82%) 0.9686* P 2 s( 44.32%)p<br/> 1.26( 55.65%)d 0.00( 0.03%)</p> |
|--|---------------------------------------------------------------------------------------------------------------------------------------------------------------------------------------------------------------------------------------------------------------------------------------------------------------------------------------------------------------------------------------------------------------------------------------------------------------------------------------------------------------------------------------------------------------------------------------------------------------------------------------------------|

**Table S14** Computed BCP descriptors for complex **4** (dispersion).

| Atom labels | $\rho(r)$ | $\nabla^2\rho(r)$ | $G(r)$ | $V(r)$ | $H(r)$ | $\epsilon$ |
|-------------|-----------|-------------------|--------|--------|--------|------------|
| Yb3-P4      | 0.04      | 0.08              | 0.02   | -0.03  | -0.004 | 0.19       |
| Yb3-P3      | 0.03      | 0.07              | 0.02   | -0.03  | -0.004 | 0.22       |
| Yb3-P1      | 0.04      | 0.09              | 0.03   | -0.04  | -0.007 | 0.18       |
| Yb3-P5      | 0.03      | 0.08              | 0.02   | -0.03  | -0.004 | 0.13       |
| Yb5-P4      | 0.03      | 0.07              | 0.02   | -0.02  | -0.003 | 0.17       |
| Yb5-P3      | 0.03      | 0.07              | 0.02   | -0.03  | -0.004 | 0.23       |
| Yb5-P5      | 0.03      | 0.07              | 0.02   | -0.02  | -0.003 | 0.12       |
| Yb5-P6      | 0.04      | 0.08              | 0.02   | -0.03  | -0.004 | 0.14       |
| Yb5-O5      | 0.04      | 0.19              | 0.05   | -0.04  | 0.002  | 0.13       |
| Yb4-P4      | 0.03      | 0.08              | 0.02   | -0.03  | -0.004 | 0.16       |
| Yb4-P3      | 0.03      | 0.07              | 0.02   | -0.02  | -0.003 | 0.16       |
| Yb4-P2      | 0.04      | 0.08              | 0.03   | -0.03  | -0.005 | 0.21       |
| Yb4-P6      | 0.03      | 0.07              | 0.02   | -0.02  | -0.003 | 0.11       |
| Yb4-O4      | 0.04      | 0.19              | 0.04   | -0.04  | 0.003  | 0.17       |
| Yb1-P3      | 0.03      | 0.06              | 0.02   | -0.02  | -0.003 | 0.19       |
| Yb1-P1      | 0.03      | 0.07              | 0.02   | -0.02  | -0.003 | 0.20       |
| Yb1-P2      | 0.04      | 0.09              | 0.03   | -0.03  | -0.006 | 0.18       |
| Yb1-O1      | 0.04      | 0.18              | 0.04   | -0.04  | 0.003  | 0.15       |
| Yb1-O2      | 0.04      | 0.19              | 0.04   | -0.04  | 0.002  | 0.07       |
| Yb2-P4      | 0.03      | 0.07              | 0.02   | -0.02  | -0.004 | 0.18       |

|        |      |      |      |       |        |      |
|--------|------|------|------|-------|--------|------|
| Yb2-P1 | 0.04 | 0.09 | 0.03 | -0.04 | -0.007 | 0.16 |
| Yb2-P2 | 0.04 | 0.09 | 0.03 | -0.03 | -0.006 | 0.16 |
| Yb2-O3 | 0.04 | 0.20 | 0.05 | -0.04 | 0.002  | 0.10 |

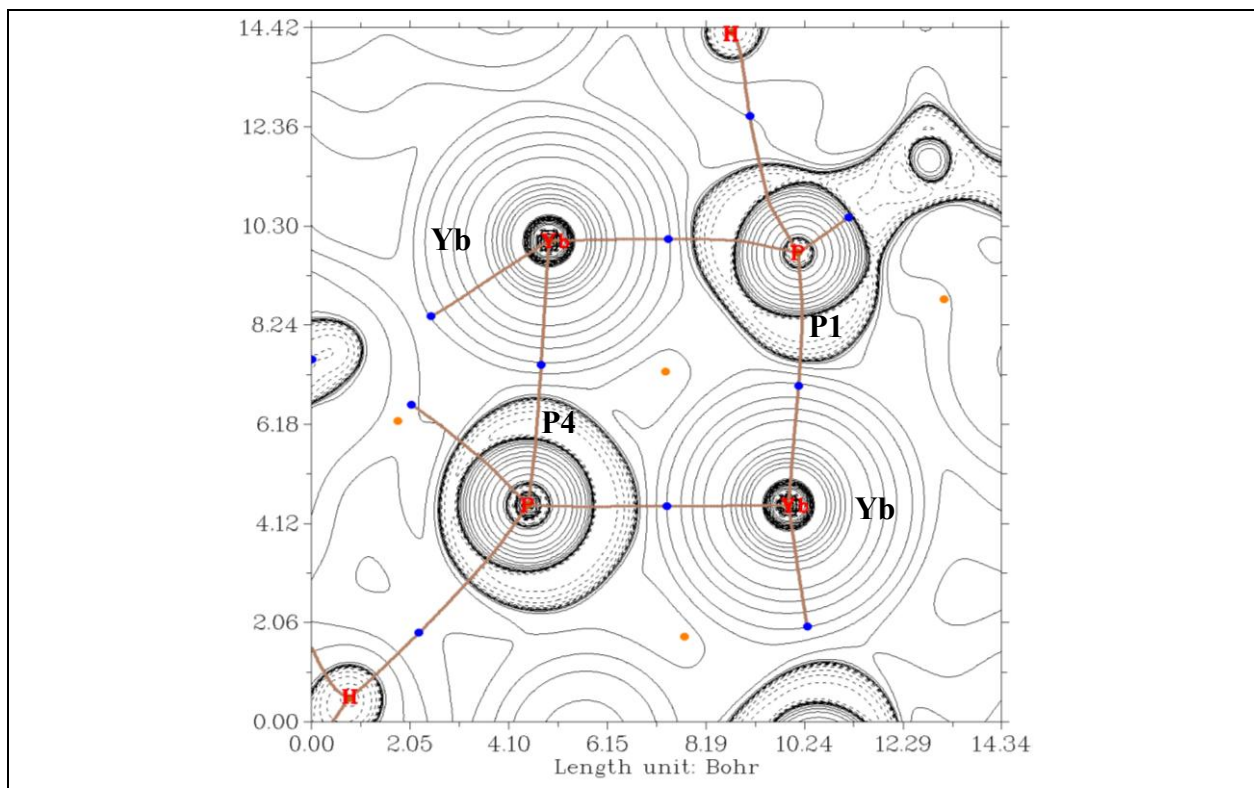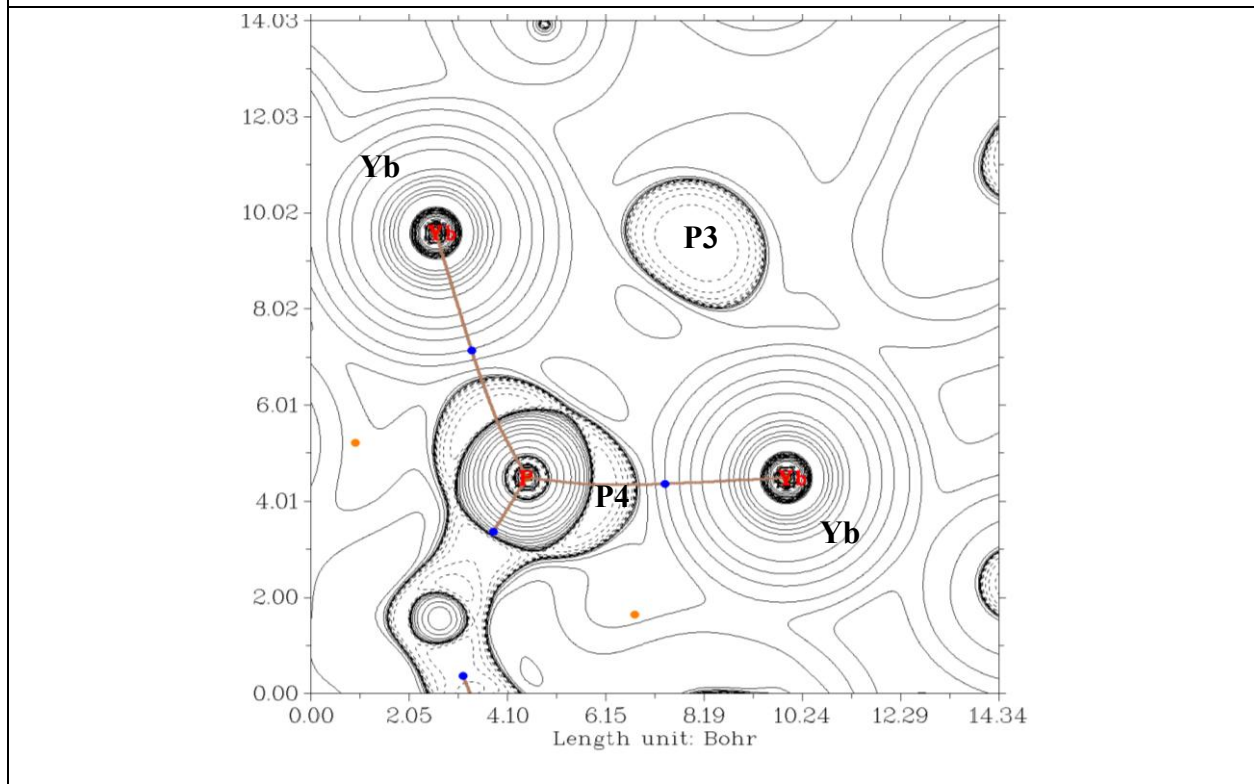

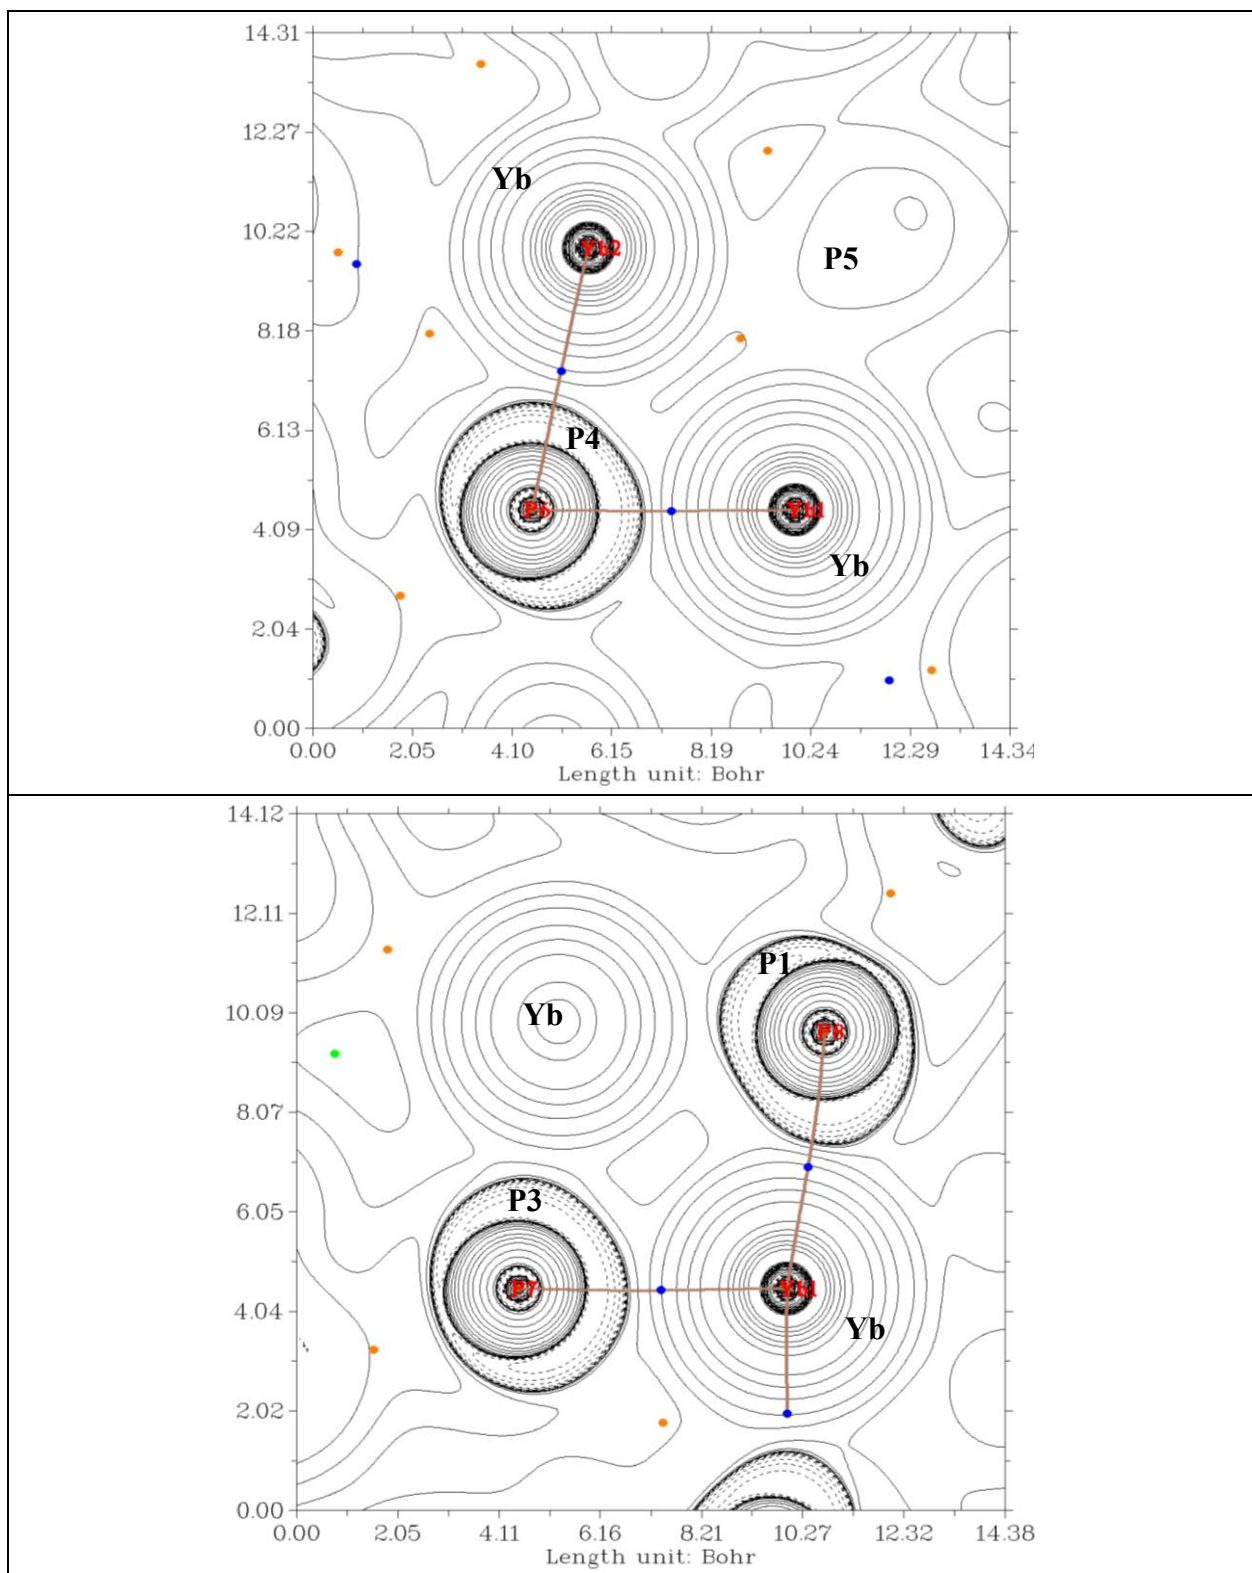

**Fig. S55** Computed Laplacian distribution for complex 4 (dispersion).

**Table S15** Comparison of bond distance (Å) between selected atoms in DFT optimized and X-ray structure for complex 5.

| Atom labels | DFT        | X-ray |  |
|-------------|------------|-------|--|
|             | dispersion |       |  |
|             |            |       |  |

|            |      |      |
|------------|------|------|
| Yb1-P4     | 2.85 | 2.83 |
| Yb1-P5     | 2.85 | 2.89 |
| Yb1-P139   | 2.87 | 2.85 |
| Yb1-P141   | 2.81 | 2.86 |
| Yb2-P4     | 2.80 | 2.82 |
| Yb2-P5     | 2.78 | 2.82 |
| Yb2-P6     | 2.82 | 2.85 |
| Yb2-C10    | 2.54 | 2.56 |
| Yb3-P4     | 2.83 | 2.83 |
| Yb3-C71    | 2.55 | 2.63 |
| Yb3-P140   | 2.79 | 2.88 |
| Yb3-P141   | 2.83 | 2.87 |
| Yb136-P4   | 2.85 | 2.85 |
| Yb136-P6   | 2.81 | 2.86 |
| Yb136-P139 | 2.86 | 2.83 |
| Yb136-P140 | 2.86 | 2.89 |
| Yb137-P139 | 2.84 | 2.82 |
| Yb137-P140 | 2.80 | 2.82 |
| Yb137-P141 | 2.84 | 2.85 |
| Yb137-C145 | 2.55 | 2.56 |
| Yb138-P5   | 2.81 | 2.88 |
| Yb138-P6   | 2.83 | 2.87 |
| Yb138-P139 | 2.86 | 2.83 |
| Yb138-C206 | 2.57 | 2.63 |

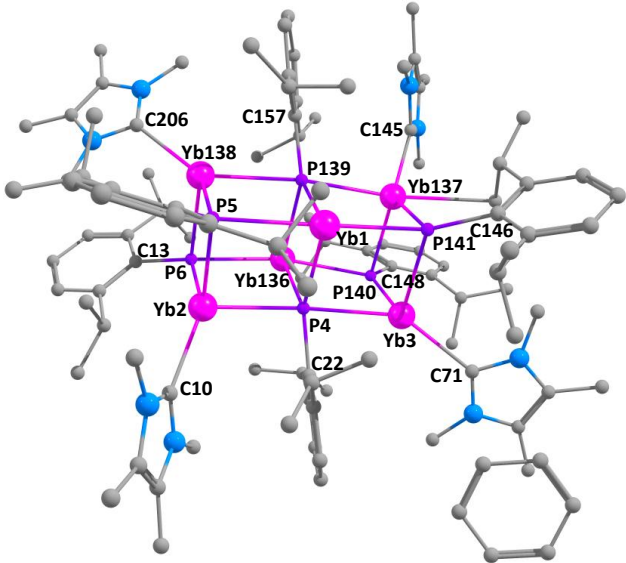

**Table S16** Computed natural charges for selected atoms in complex **5** (dispersion).

| Atom labels | Natural charges |
|-------------|-----------------|
| Yb1         | 0.76217         |
| Yb2         | 0.82570         |
| Yb3         | 1.02957         |
| P4          | -0.48169        |
| P5          | -0.64084        |

|       |          |
|-------|----------|
| P6    | -0.64607 |
| C10   | 0.03951  |
| C71   | -0.00183 |
| Yb136 | 0.83212  |
| Yb137 | 0.85262  |
| Yb138 | 1.02151  |
| P139  | -0.51198 |
| P140  | -0.64048 |
| P141  | -0.65000 |
| C145  | 0.03774  |
| C206  | 0.01734  |

**Table S17** Computed Wiberg bond index between selected atoms in complex **5** (dispersion).

| Atom labels | Wiberg bond index |
|-------------|-------------------|
| Yb1-P4      | 0.4263            |
| Yb1-P5      | 0.4037            |
| Yb1-P139    | 0.4205            |
| Yb1-P141    | 0.4594            |
| Yb2-P4      | 0.3920            |
| Yb2-P5      | 0.5102            |
| Yb2-P6      | 0.4756            |
| Yb2-C10     | 0.3039            |
| Yb3-P4      | 0.3119            |
| Yb3-C71     | 0.2544            |
| Yb3-P140    | 0.4360            |
| Yb3-P141    | 0.4210            |
| Yb136-P4    | 0.4096            |
| Yb136-P6    | 0.4389            |
| Yb136-P139  | 0.4054            |
| Yb136-P140  | 0.3903            |
| Yb137-P139  | 0.3877            |
| Yb137- P140 | 0.4753            |
| Yb137-P141  | 0.4569            |
| Yb137-C145  | 0.2973            |
| Yb138-P5    | 0.4235            |
| Yb138-P6    | 0.4172            |
| Yb138-P139  | 0.3195            |
| Yb138-C206  | 0.2733            |

Bonding orbitals between ytterbium and atoms in the first coordination sphere of metal in complex **5** (dispersion)

(1.79565) BD ( 1)Yb 1- P139

( 10.46%) 0.3234\*Yb 1 s( 21.01%)p 0.01( 0.21%)d 3.74( 78.63%) f 0.01( 0.14%)g 0.00( 0.01%)

( 89.54%) 0.9463\* P139 s( 29.99%)p 2.33( 69.98%)d 0.00( 0.03%)

(1.72768) BD ( 1)Yb 2- P 4

( 7.31%) 0.2704\*Yb 2 s( 19.32%)p 0.00( 0.05%)d 4.17( 80.51%) f 0.01( 0.11%)g 0.00( 0.02%)

( 92.69%) 0.9628\* P 4 s( 23.35%)p 3.28( 76.62%)d 0.00( 0.03%)

(1.70063) BD ( 2)Yb 2- P 4

( 6.25%) 0.2501\*Yb 2 s( 10.42%)p 0.02( 0.19%)d 8.57( 89.26%) f 0.01( 0.12%)g 0.00( 0.01%)

( 93.75%) 0.9682\* P 4 s( 22.14%)p 3.52( 77.84%)d 0.00( 0.02%)

(1.79409) BD ( 1)Yb 2- P 6

( 9.74%) 0.3121\*Yb 2 s( 29.67%)p 0.00( 0.09%)d 2.36( 70.04%) f 0.01( 0.19%)g 0.00( 0.01%)

( 90.26%) 0.9500\* P 6 s( 43.16%)p 1.32( 56.79%)d 0.00( 0.05%)

(1.68407) BD ( 1)Yb 3- P 4

( 8.51%) 0.2917\*Yb 3 s( 15.99%)p 0.01( 0.12%)d 5.24( 83.73%) f 0.01( 0.13%)g 0.00( 0.03%)

( 91.49%) 0.9565\* P 4 s( 39.03%)p 1.56( 60.94%)d 0.00( 0.03%)

(1.73327) BD ( 1)Yb 3- P141

( 8.73%) 0.2955\*Yb 3 s( 31.64%)p 0.00( 0.10%)d 2.15( 68.00%) f 0.01( 0.23%)g 0.00( 0.02%)

( 91.27%) 0.9553\* P141 s( 21.16%)p 3.73( 78.81%)d 0.00( 0.03%)

(1.71296) BD ( 1) P 6-Yb138

( 90.51%) 0.9514\* P 6 s( 22.47%)p 3.45( 77.48%)d 0.00( 0.05%)

( 9.49%) 0.3081\*Yb138 s( 31.32%)p 0.00( 0.08%)d 2.18( 68.38%) f 0.01( 0.19%)g 0.00( 0.02%)

(1.75731) BD ( 1)Yb137- P139

( 9.07%) 0.3012\*Yb137 s( 27.58%)p 0.00( 0.10%)d 2.62( 72.21%) f 0.00( 0.09%)g 0.00( 0.02%)

( 90.93%) 0.9536\* P139 s( 29.82%)p 2.35( 70.16%)d 0.00( 0.02%)

(1.73063) BD ( 1)Yb137- P140

( 10.87%) 0.3296\*Yb137 s( 31.42%)p 0.00( 0.08%)d 2.17( 68.27%) f 0.01( 0.21%)g 0.00( 0.02%)

( 89.13%) 0.9441\* P140 s( 67.49%)p 0.48( 32.47%)d 0.00( 0.04%)

(1.77290) BD ( 1)Yb137- P141

( 9.57%) 0.3093\*Yb137 s( 31.09%)p 0.00( 0.10%)d 2.21( 68.59%) f 0.01( 0.21%)g 0.00( 0.01%)

( 90.43%) 0.9510\* P141 s( 46.01%)p 1.17( 53.96%)d 0.00( 0.03%)

(1.69325) BD ( 1)Yb138- P139

( 7.83%) 0.2798\*Yb138 s( 19.74%)p 0.00( 0.07%)d 4.05( 80.03%) f 0.01( 0.13%)g  
 0.00( 0.02%)  
 ( 92.17%) 0.9601\* P139 s( 23.55%)p 3.25( 76.43%)d 0.00( 0.02%)

**Table S18** NBO Second order perturbation analysis for complex **5** (dispersion).

| Donor NBO                                                                                                                                                                                            | Acceptor NBO                                                                                        | E(2)<br>kcal/mol |
|------------------------------------------------------------------------------------------------------------------------------------------------------------------------------------------------------|-----------------------------------------------------------------------------------------------------|------------------|
| (1.71108) LP ( 1) P140<br>s( 1.82%)p53.78( 98.13%)d<br>0.02( 0.04%)                                                                                                                                  | (0.21839) LV ( 1)Yb 3<br>s( 46.49%)p 0.00( 0.14%)d<br>1.14( 53.07%)f 0.01( 0.28%)g<br>0.00( 0.01%)  | 21.07            |
| (1.71108) LP ( 1) P140<br>s( 1.82%)p53.78( 98.13%)d<br>0.02( 0.04%)                                                                                                                                  | (0.15060) LV ( 2)Yb 3<br>s( 0.43%)p<br>0.10( 0.04%)d99.99( 99.46%)f<br>0.16( 0.07%)g 0.01( 0.00%)   | 13.86            |
| (1.71108) LP ( 1) P140<br>s( 1.82%)p53.78( 98.13%)d<br>0.02( 0.04%)                                                                                                                                  | (0.21254) LV ( 1)Yb137<br>s( 7.66%)p<br>0.01( 0.07%)d12.03( 92.12%)f<br>0.02( 0.15%)g 0.00( 0.01%)  | 21.75            |
| (1.70260) LP ( 1) P141<br>s( 12.95%)p 6.72( 87.02%)d<br>0.00( 0.03%)                                                                                                                                 | (0.36817) LV ( 1)Yb 1<br>s( 23.99%)p 0.00( 0.06%)d<br>3.16( 75.87%) f 0.00( 0.07%)g<br>0.00( 0.01%) | 80.02            |
| (1.70260) LP ( 1) P141<br>s( 12.95%)p 6.72( 87.02%)d<br>0.00( 0.03%)                                                                                                                                 | (0.15363) LV ( 4)Yb 1<br>s( 0.09%)p<br>0.65( 0.06%)d99.99( 99.81%)f<br>0.44( 0.04%)g 0.03( 0.00%)   | 12.85            |
| (1.70260) LP ( 1) P141<br>s( 12.95%)p 6.72( 87.02%)d<br>0.00( 0.03%)                                                                                                                                 | (0.15060) LV ( 2)Yb 3<br>s( 0.43%)p<br>0.10( 0.04%)d99.99( 99.46%)f<br>0.16( 0.07%)g 0.01( 0.00%)   | 12.33            |
| (1.79565) BD ( 1)Yb 1- P139<br>( 10.46%) 0.3234*Yb 1 s( 21.01%)p<br>0.01( 0.21%)d 3.74( 78.63%) f<br>0.01( 0.14%)g 0.00( 0.01%)<br>( 89.54%) 0.9463* P139 s( 29.99%)p<br>2.33( 69.98%)d 0.00( 0.03%) | (0.14791) LV ( 2)Yb137<br>s( 1.50%)p<br>0.09( 0.14%)d65.40( 98.31%)f<br>0.03( 0.04%)g 0.01( 0.01%)  | 18.44            |
| (1.79565) BD ( 1)Yb 1- P139<br>( 10.46%) 0.3234*Yb 1 s( 21.01%)p<br>0.01( 0.21%)d 3.74( 78.63%) f<br>0.01( 0.14%)g 0.00( 0.01%)<br>( 89.54%) 0.9463* P139 s( 29.99%)p                                | (0.16930) LV ( 2)Yb138<br>s( 0.80%)p<br>0.09( 0.07%)d99.99( 99.00%)f<br>0.14( 0.11%)g 0.01( 0.01%)  | 10.65            |

|                                                                                                                                                                                                     |                                                                                                     |       |
|-----------------------------------------------------------------------------------------------------------------------------------------------------------------------------------------------------|-----------------------------------------------------------------------------------------------------|-------|
| 2.33( 69.98%)d 0.00( 0.03%)                                                                                                                                                                         |                                                                                                     |       |
| (1.72768) BD ( 1)Yb 2- P 4<br>( 7.31%) 0.2704*Yb 2 s( 19.32%)p<br>0.00( 0.05%)d 4.17( 80.51%) f<br>0.01( 0.11%)g 0.00( 0.02%)<br>( 92.69%) 0.9628* P 4 s( 23.35%)p<br>3.28( 76.62%)d 0.00( 0.03%)   | (0.19502) LV ( 3)Yb 1<br>s( 46.25%)p 0.00( 0.10%)d<br>1.16( 53.56%)f 0.00( 0.07%)g<br>0.00( 0.01%)  | 42.75 |
| (1.68407) BD ( 1)Yb 3- P 4<br>( 8.51%) 0.2917*Yb 3 s( 15.99%)p<br>0.01( 0.12%)d 5.24( 83.73%) f<br>0.01( 0.13%)g 0.00( 0.03%)<br>( 91.49%) 0.9565* P 4 s( 39.03%)p<br>1.56( 60.94%)d 0.00( 0.03%)   | (0.22505) LV ( 2)Yb 1<br>s( 7.92%)p<br>0.00( 0.03%)d11.61( 91.98%)f<br>0.01( 0.05%)g 0.00( 0.01%)   | 42.77 |
| (1.68407) BD ( 1)Yb 3- P 4<br>( 8.51%) 0.2917*Yb 3 s( 15.99%)p<br>0.01( 0.12%)d 5.24( 83.73%) f<br>0.01( 0.13%)g 0.00( 0.03%)<br>( 91.49%) 0.9565* P 4 s( 39.03%)p<br>1.56( 60.94%)d 0.00( 0.03%)   | (0.19502) LV ( 3)Yb 1<br>s( 46.25%)p 0.00( 0.10%)d<br>1.16( 53.56%)f 0.00( 0.07%)g<br>0.00( 0.01%)  | 15.42 |
| (1.73327) BD ( 1)Yb 3- P141<br>( 8.73%) 0.2955*Yb 3 s( 31.64%)p<br>0.00( 0.10%)d 2.15( 68.00%) f<br>0.01( 0.23%)g 0.00( 0.02%)<br>( 91.27%) 0.9553* P141 s( 21.16%)p<br>3.73( 78.81%)d 0.00( 0.03%) | (0.36817) LV ( 1)Yb 1<br>s( 23.99%)p 0.00( 0.06%)d<br>3.16( 75.87%) f 0.00( 0.07%)g<br>0.00( 0.01%) | 18.07 |
| (1.73327) BD ( 1)Yb 3- P141<br>( 8.73%) 0.2955*Yb 3 s( 31.64%)p<br>0.00( 0.10%)d 2.15( 68.00%) f<br>0.01( 0.23%)g 0.00( 0.02%)<br>( 91.27%) 0.9553* P141 s( 21.16%)p<br>3.73( 78.81%)d 0.00( 0.03%) | (0.21254) LV ( 1)Yb137<br>s( 7.66%)p<br>0.01( 0.07%)d12.03( 92.12%)f<br>0.02( 0.15%)g 0.00( 0.01%)  | 17.51 |
| (1.73327) BD ( 1)Yb 3- P141<br>( 8.73%) 0.2955*Yb 3 s( 31.64%)p<br>0.00( 0.10%)d 2.15( 68.00%) f<br>0.01( 0.23%)g 0.00( 0.02%)<br>( 91.27%) 0.9553* P141 s( 21.16%)p<br>3.73( 78.81%)d 0.00( 0.03%) | (0.14791) LV ( 2)Yb137<br>s( 1.50%)p<br>0.09( 0.14%)d65.40( 98.31%)f<br>0.03( 0.04%)g 0.01( 0.01%)  | 11.76 |
| (1.71296) BD ( 1) P 6-Yb138<br>( 90.51%) 0.9514* P 6 s( 22.47%)p<br>3.45( 77.48%)d 0.00( 0.05%)<br>( 9.49%) 0.3081*Yb138 s( 31.32%)p<br>0.00( 0.08%)d 2.18( 68.38%) f<br>0.01( 0.19%)g 0.00( 0.02%) | (0.21832) LV ( 2)Yb 2<br>s( 7.92%)p<br>0.01( 0.06%)d11.60( 91.85%)f<br>0.02( 0.16%)g 0.00( 0.01%)   | 25.91 |

|                                                                                                                                                                                                        |                                                                                                     |       |
|--------------------------------------------------------------------------------------------------------------------------------------------------------------------------------------------------------|-----------------------------------------------------------------------------------------------------|-------|
| (1.73063) BD ( 1)Yb137- P140<br>( 10.87%) 0.3296*Yb137 s( 31.42%)p<br>0.00( 0.08%)d 2.17( 68.27%) f<br>0.01( 0.21%)g 0.00( 0.02%)<br>( 89.13%) 0.9441* P140 s( 67.49%)p<br>0.48( 32.47%)d 0.00( 0.04%) | (0.21839) LV ( 1)Yb 3<br>s( 46.49%)p 0.00( 0.14%)d<br>1.14( 53.07%)f 0.01( 0.28%)g<br>0.00( 0.01%)  | 50.98 |
| (1.77290) BD ( 1)Yb137- P141<br>( 9.57%) 0.3093*Yb137 s( 31.09%)p<br>0.00( 0.10%)d 2.21( 68.59%) f<br>0.01( 0.21%)g 0.00( 0.01%)<br>( 90.43%) 0.9510* P141 s( 46.01%)p<br>1.17( 53.96%)d 0.00( 0.03%)  | (0.36817) LV ( 1)Yb 1<br>s( 23.99%)p 0.00( 0.06%)d<br>3.16( 75.87%) f 0.00( 0.07%)g<br>0.00( 0.01%) | 86.35 |
| (1.77290) BD ( 1)Yb137- P141<br>( 9.57%) 0.3093*Yb137 s( 31.09%)p<br>0.00( 0.10%)d 2.21( 68.59%) f<br>0.01( 0.21%)g 0.00( 0.01%)<br>( 90.43%) 0.9510* P141 s( 46.01%)p<br>1.17( 53.96%)d 0.00( 0.03%)  | (0.22505) LV ( 2)Yb 1<br>s( 7.92%)p<br>0.00( 0.03%)d11.61( 91.98%)f<br>0.01( 0.05%)g 0.00( 0.01%)   | 18.68 |
| (1.77290) BD ( 1)Yb137- P141<br>( 9.57%) 0.3093*Yb137 s( 31.09%)p<br>0.00( 0.10%)d 2.21( 68.59%) f<br>0.01( 0.21%)g 0.00( 0.01%)<br>( 90.43%) 0.9510* P141 s( 46.01%)p<br>1.17( 53.96%)d 0.00( 0.03%)  | (0.19502) LV ( 3)Yb 1<br>s( 46.25%)p 0.00( 0.10%)d<br>1.16( 53.56%)f 0.00( 0.07%)g<br>0.00( 0.01%)  | 24.33 |
| (1.71788) LP ( 1) P 6<br>s( 14.86%)p 5.73( 85.12%)d<br>0.00( 0.03%)                                                                                                                                    | (0.37247) LV ( 1)Yb136<br>s( 14.35%)p 0.00( 0.03%)d<br>5.97( 85.59%)f 0.00( 0.03%)g<br>0.00( 0.01%) | 81.41 |
| (1.71788) LP ( 1) P 6<br>s( 14.86%)p 5.73( 85.12%)d<br>0.00( 0.03%)                                                                                                                                    | (0.17535) LV ( 4)Yb136<br>s( 79.67%)p 0.00( 0.21%)d<br>0.25( 19.97%)f 0.00( 0.13%)g<br>0.00( 0.02%) | 12.46 |
| (1.71108) LP ( 1) P140<br>s( 1.82%)p53.78( 98.13%)d<br>0.02( 0.04%)                                                                                                                                    | (0.37247) LV ( 1)Yb136<br>s( 14.35%)p 0.00( 0.03%)d<br>5.97( 85.59%)f 0.00( 0.03%)g<br>0.00( 0.01%) | 15.72 |
| (1.70063) BD ( 2)Yb 2- P 4<br>( 6.25%) 0.2501*Yb 2 s( 10.42%)p<br>0.02( 0.19%)d 8.57( 89.26%) f<br>0.01( 0.12%)g 0.00( 0.01%)<br>( 93.75%) 0.9682* P 4 s( 22.14%)p<br>3.52( 77.84%)d 0.00( 0.02%)      | (0.24368) LV ( 2)Yb136<br>s( 0.73%)p<br>0.11( 0.08%)d99.99( 99.07%)f<br>0.15( 0.11%)g 0.01( 0.00%)  | 32.55 |
| (1.70063) BD ( 2)Yb 2- P 4                                                                                                                                                                             | (0.17535) LV ( 4)Yb136                                                                              | 13.85 |

|                                                                                                                                                                                                     |                                                                                                     |       |
|-----------------------------------------------------------------------------------------------------------------------------------------------------------------------------------------------------|-----------------------------------------------------------------------------------------------------|-------|
| ( 6.25%) 0.2501*Yb 2 s( 10.42%)p<br>0.02( 0.19%)d 8.57( 89.26%) f<br>0.01( 0.12%)g 0.00( 0.01%)<br>( 93.75%) 0.9682* P 4 s( 22.14%)p<br>3.52( 77.84%)d 0.00( 0.02%)                                 | s( 79.67%)p 0.00( 0.21%)d<br>0.25( 19.97%)f 0.00( 0.13%)g<br>0.00( 0.02%)                           |       |
| (1.70063) BD ( 2)Yb 2- P 4<br>( 6.25%) 0.2501*Yb 2 s( 10.42%)p<br>0.02( 0.19%)d 8.57( 89.26%) f<br>0.01( 0.12%)g 0.00( 0.01%)<br>( 93.75%) 0.9682* P 4 s( 22.14%)p<br>3.52( 77.84%)d 0.00( 0.02%)   | (0.13950) LV ( 5)Yb136<br>s( 2.68%)p<br>0.02( 0.05%)d36.26( 97.24%)f<br>0.01( 0.03%)g 0.00( 0.00%)  | 14.43 |
| (1.79409) BD ( 1)Yb 2- P 6<br>( 9.74%) 0.3121*Yb 2 s( 29.67%)p<br>0.00( 0.09%)d 2.36( 70.04%) f<br>0.01( 0.19%)g 0.00( 0.01%)<br>( 90.26%) 0.9500* P 6 s( 43.16%)p<br>1.32( 56.79%)d 0.00( 0.05%)   | (0.37247) LV ( 1)Yb136<br>s( 14.35%)p 0.00( 0.03%)d<br>5.97( 85.59%)f 0.00( 0.03%)g<br>0.00( 0.01%) | 65.81 |
| (1.79409) BD ( 1)Yb 2- P 6<br>( 9.74%) 0.3121*Yb 2 s( 29.67%)p<br>0.00( 0.09%)d 2.36( 70.04%) f<br>0.01( 0.19%)g 0.00( 0.01%)<br>( 90.26%) 0.9500* P 6 s( 43.16%)p<br>1.32( 56.79%)d 0.00( 0.05%)   | (0.19166) LV ( 3)Yb136<br>s( 1.91%)p<br>0.01( 0.02%)d51.28( 98.03%)f<br>0.01( 0.02%)g 0.00( 0.01%)  | 14.42 |
| (1.68407) BD ( 1)Yb 3- P 4<br>( 8.51%) 0.2917*Yb 3 s( 15.99%)p<br>0.01( 0.12%)d 5.24( 83.73%) f<br>0.01( 0.13%)g 0.00( 0.03%)<br>( 91.49%) 0.9565* P 4 s( 39.03%)p<br>1.56( 60.94%)d 0.00( 0.03%)   | (0.24368) LV ( 2)Yb136<br>s( 0.73%)p<br>0.11( 0.08%)d99.99( 99.07%)f<br>0.15( 0.11%)g 0.01( 0.00%)  | 14.17 |
| (1.68407) BD ( 1)Yb 3- P 4<br>( 8.51%) 0.2917*Yb 3 s( 15.99%)p<br>0.01( 0.12%)d 5.24( 83.73%) f<br>0.01( 0.13%)g 0.00( 0.03%)<br>( 91.49%) 0.9565* P 4 s( 39.03%)p<br>1.56( 60.94%)d 0.00( 0.03%)   | (0.17535) LV ( 4)Yb136<br>s( 79.67%)p 0.00( 0.21%)d<br>0.25( 19.97%)f 0.00( 0.13%)g<br>0.00( 0.02%) | 12.08 |
| (1.71296) BD ( 1) P 6-Yb138<br>( 90.51%) 0.9514* P 6 s( 22.47%)p<br>3.45( 77.48%)d 0.00( 0.05%)<br>( 9.49%) 0.3081*Yb138 s( 31.32%)p<br>0.00( 0.08%)d 2.18( 68.38%) f<br>0.01( 0.19%)g 0.00( 0.02%) | (0.37247) LV ( 1)Yb136<br>s( 14.35%)p 0.00( 0.03%)d<br>5.97( 85.59%)f 0.00( 0.03%)g<br>0.00( 0.01%) | 22.41 |
| (1.75731) BD ( 1)Yb137- P139<br>( 9.07%) 0.3012*Yb137 s( 27.58%)p                                                                                                                                   | (0.24368) LV ( 2)Yb136<br>s( 0.73%)p                                                                | 14.41 |

|                                                                                                                                                                                                        |                                                                                                     |        |
|--------------------------------------------------------------------------------------------------------------------------------------------------------------------------------------------------------|-----------------------------------------------------------------------------------------------------|--------|
| 0.00( 0.10%)d 2.62( 72.21%) f<br>0.00( 0.09%)g 0.00( 0.02%)<br>( 90.93%) 0.9536* P139 s( 29.82%)p<br>2.35( 70.16%)d 0.00( 0.02%)                                                                       | 0.11( 0.08%)d99.99( 99.07%)f<br>0.15( 0.11%)g 0.01( 0.00%)                                          |        |
| (1.75731) BD ( 1)Yb137- P139<br>( 9.07%) 0.3012*Yb137 s( 27.58%)p<br>0.00( 0.10%)d 2.62( 72.21%) f<br>0.00( 0.09%)g 0.00( 0.02%)<br>( 90.93%) 0.9536* P139 s( 29.82%)p<br>2.35( 70.16%)d 0.00( 0.02%)  | (0.19166) LV ( 3)Yb136<br>s( 1.91%)p<br>0.01( 0.02%)d51.28( 98.03%)f<br>0.01( 0.02%)g 0.00( 0.01%)  | 22.09  |
| (1.75731) BD ( 1)Yb137- P139<br>( 9.07%) 0.3012*Yb137 s( 27.58%)p<br>0.00( 0.10%)d 2.62( 72.21%) f<br>0.00( 0.09%)g 0.00( 0.02%)<br>( 90.93%) 0.9536* P139 s( 29.82%)p<br>2.35( 70.16%)d 0.00( 0.02%)  | (0.17535) LV ( 4)Yb136<br>s( 79.67%)p 0.00( 0.21%)d<br>0.25( 19.97%)f 0.00( 0.13%)g<br>0.00( 0.02%) | 15.76  |
| (1.73063) BD ( 1)Yb137- P140<br>( 10.87%) 0.3296*Yb137 s( 31.42%)p<br>0.00( 0.08%)d 2.17( 68.27%) f<br>0.01( 0.21%)g 0.00( 0.02%)<br>( 89.13%) 0.9441* P140 s( 67.49%)p<br>0.48( 32.47%)d 0.00( 0.04%) | (0.37247) LV ( 1)Yb136<br>s( 14.35%)p 0.00( 0.03%)d<br>5.97( 85.59%)f 0.00( 0.03%)g<br>0.00( 0.01%) | 118.50 |
| (1.73063) BD ( 1)Yb137- P140<br>( 10.87%) 0.3296*Yb137 s( 31.42%)p<br>0.00( 0.08%)d 2.17( 68.27%) f<br>0.01( 0.21%)g 0.00( 0.02%)<br>( 89.13%) 0.9441* P140 s( 67.49%)p<br>0.48( 32.47%)d 0.00( 0.04%) | (0.17535) LV ( 4)Yb136<br>s( 79.67%)p 0.00( 0.21%)d<br>0.25( 19.97%)f 0.00( 0.13%)g<br>0.00( 0.02%) | 12.10  |
| (1.69325) BD ( 1)Yb138- P139<br>( 7.83%) 0.2798*Yb138 s( 19.74%)p<br>0.00( 0.07%)d 4.05( 80.03%) f<br>0.01( 0.13%)g 0.00( 0.02%)<br>( 92.17%) 0.9601* P139 s( 23.55%)p<br>3.25( 76.43%)d 0.00( 0.02%)  | (0.24368) LV ( 2)Yb136<br>s( 0.73%)p<br>0.11( 0.08%)d99.99( 99.07%)f<br>0.15( 0.11%)g 0.01( 0.00%)  | 39.16  |
| (1.69325) BD ( 1)Yb138- P139<br>( 7.83%) 0.2798*Yb138 s( 19.74%)p<br>0.00( 0.07%)d 4.05( 80.03%) f<br>0.01( 0.13%)g 0.00( 0.02%)<br>( 92.17%) 0.9601* P139 s( 23.55%)p<br>3.25( 76.43%)d 0.00( 0.02%)  | (0.17535) LV ( 4)Yb136<br>s( 79.67%)p 0.00( 0.21%)d<br>0.25( 19.97%)f 0.00( 0.13%)g<br>0.00( 0.02%) | 23.37  |
| (1.79265) BD ( 2) P140- C148<br>( 83.20%) 0.9121* P140 s( 9.84%)p<br>9.15( 90.06%)d 0.01( 0.10%)                                                                                                       | (0.37247) LV ( 1)Yb136<br>s( 14.35%)p 0.00( 0.03%)d<br>5.97( 85.59%)f 0.00( 0.03%)g                 | 21.67  |

|                                                                                                                                                                         |                                                                                                     |        |
|-------------------------------------------------------------------------------------------------------------------------------------------------------------------------|-----------------------------------------------------------------------------------------------------|--------|
| ( 16.80%) 0.4099* C148<br>s( 0.54%)p99.99( 99.40%)d<br>0.11( 0.06%)                                                                                                     | 0.00( 0.01%)                                                                                        |        |
| (1.79265) BD ( 2) P140- C148<br>( 83.20%) 0.9121* P140 s( 9.84%)p<br>9.15( 90.06%)d 0.01( 0.10%)<br>( 16.80%) 0.4099* C148<br>s( 0.54%)p99.99( 99.40%)d<br>0.11( 0.06%) | (0.19166) LV ( 3)Yb136<br>s( 1.91%)p<br>0.01( 0.02%)d51.28( 98.03%)f<br>0.01( 0.02%)g 0.00( 0.01%)  | 13.54  |
| (1.69940) LP ( 1) P 5<br>s( 0.40%)p99.99( 99.57%)d<br>0.08( 0.03%)                                                                                                      | (0.36817) LV ( 1)Yb 1<br>s( 23.99%)p 0.00( 0.06%)d<br>3.16( 75.87%) f 0.00( 0.07%)g<br>0.00( 0.01%) | 19.35  |
| (1.69940) LP ( 1) P 5<br>s( 0.40%)p99.99( 99.57%)d<br>0.08( 0.03%)                                                                                                      | (0.19502) LV ( 3)Yb 1<br>s( 46.25%)p 0.00( 0.10%)d<br>1.16( 53.56%)f 0.00( 0.07%)g<br>0.00( 0.01%)  | 11.70  |
| (1.69940) LP ( 1) P 5<br>s( 0.40%)p99.99( 99.57%)d<br>0.08( 0.03%)                                                                                                      | (0.21832) LV ( 2)Yb 2<br>s( 7.92%)p<br>0.01( 0.06%)d11.60( 91.85%)f<br>0.02( 0.16%)g 0.00( 0.01%)   | 12.80  |
| (1.69940) LP ( 1) P 5<br>s( 0.40%)p99.99( 99.57%)d<br>0.08( 0.03%)                                                                                                      | (0.16930) LV ( 2)Yb138<br>s( 0.80%)p<br>0.09( 0.07%)d99.99( 99.00%)f<br>0.14( 0.11%)g 0.01( 0.01%)  | 27.94  |
| (1.08256) LP ( 2) P 5<br>s( 41.85%)p 0.77( 32.10%)d<br>0.62( 26.05%)                                                                                                    | (0.36817) LV ( 1)Yb 1<br>s( 23.99%)p 0.00( 0.06%)d<br>3.16( 75.87%) f 0.00( 0.07%)g<br>0.00( 0.01%) | 365.73 |
| (1.08256) LP ( 2) P 5<br>s( 41.85%)p 0.77( 32.10%)d<br>0.62( 26.05%)                                                                                                    | (0.19502) LV ( 3)Yb 1<br>s( 46.25%)p 0.00( 0.10%)d<br>1.16( 53.56%)f 0.00( 0.07%)g<br>0.00( 0.01%)  | 95.80  |
| (1.08256) LP ( 2) P 5<br>s( 41.85%)p 0.77( 32.10%)d<br>0.62( 26.05%)                                                                                                    | (0.24887) LV ( 1)Yb 2<br>s( 31.61%)p 0.00( 0.08%)d<br>2.15( 68.04%)f 0.01( 0.25%)g<br>0.00( 0.01%)  | 44.02  |
| (1.08256) LP ( 2) P 5<br>s( 41.85%)p 0.77( 32.10%)d<br>0.62( 26.05%)                                                                                                    | (0.12737) LV ( 3)Yb 2<br>s( 0.86%)p<br>0.12( 0.10%)d99.99( 98.97%)f<br>0.07( 0.06%)g 0.01( 0.01%)   | 42.01  |
| (1.08256) LP ( 2) P 5<br>s( 41.85%)p 0.77( 32.10%)d                                                                                                                     | (0.24368) LV ( 2)Yb136<br>s( 0.73%)p                                                                | 13.78  |

|                                                                      |                                                                                                     |       |
|----------------------------------------------------------------------|-----------------------------------------------------------------------------------------------------|-------|
| 0.62( 26.05%)                                                        | 0.11( 0.08%)d99.99( 99.07%)f<br>0.15( 0.11%)g 0.01( 0.00%)                                          |       |
| (1.78165) LP ( 1) C 10<br>s( 44.11%)p 1.27( 55.86%)d<br>0.00( 0.03%) | (0.21832) LV ( 2)Yb 2<br>s( 7.92%)p<br>0.01( 0.06%)d11.60( 91.85%)f<br>0.02( 0.16%)g 0.00( 0.01%)   | 76.61 |
| (1.78165) LP ( 1) C 10<br>s( 44.11%)p 1.27( 55.86%)d<br>0.00( 0.03%) | (0.12737) LV ( 3)Yb 2<br>s( 0.86%)p<br>0.12( 0.10%)d99.99( 98.97%)f<br>0.07( 0.06%)g 0.01( 0.01%)   | 14.59 |
| (1.81520) LP ( 1) C 71<br>s( 44.23%)p 1.26( 55.75%)d<br>0.00( 0.03%) | (0.21839) LV ( 1)Yb 3<br>s( 46.49%)p 0.00( 0.14%)d<br>1.14( 53.07%)f 0.01( 0.28%)g<br>0.00( 0.01%)  | 20.78 |
| (1.81520) LP ( 1) C 71<br>s( 44.23%)p 1.26( 55.75%)d<br>0.00( 0.03%) | (0.15060) LV ( 2)Yb 3<br>s( 0.43%)p<br>0.10( 0.04%)d99.99( 99.46%)f<br>0.16( 0.07%)g 0.01( 0.00%)   | 13.42 |
| (1.81520) LP ( 1) C 71<br>s( 44.23%)p 1.26( 55.75%)d<br>0.00( 0.03%) | (0.11159) LV ( 3)Yb 3<br>s( 4.68%)p<br>0.03( 0.15%)d20.30( 95.06%)f<br>0.02( 0.09%)g 0.00( 0.02%)   | 10.05 |
| (1.81520) LP ( 1) C 71<br>s( 44.23%)p 1.26( 55.75%)d<br>0.00( 0.03%) | (0.09462) LV ( 4)Yb 3<br>s( 0.51%)p<br>0.31( 0.16%)d99.99( 99.26%)f<br>0.13( 0.07%)g 0.02( 0.01%)   | 10.69 |
| (1.78386) LP ( 1) C145<br>s( 44.16%)p 1.26( 55.81%)d<br>0.00( 0.03%) | (0.21254) LV ( 1)Yb137<br>s( 7.66%)p<br>0.01( 0.07%)d12.03( 92.12%)f<br>0.02( 0.15%)g 0.00( 0.01%)  | 70.59 |
| (1.78386) LP ( 1) C145<br>s( 44.16%)p 1.26( 55.81%)d<br>0.00( 0.03%) | (0.12124) LV ( 3)Yb137<br>s( 0.47%)p<br>0.39( 0.18%)d99.99( 99.29%)f<br>0.10( 0.04%)g 0.02( 0.01%)  | 19.27 |
| (1.80381) LP ( 1) C206<br>s( 44.52%)p 1.25( 55.45%)d<br>0.00( 0.03%) | (0.24144) LV ( 1)Yb138<br>s( 44.38%)p 0.00( 0.12%)d<br>1.25( 55.26%)f 0.01( 0.23%)g<br>0.00( 0.01%) | 56.67 |
| (1.80381) LP ( 1) C206<br>s( 44.52%)p 1.25( 55.45%)d<br>0.00( 0.03%) | (0.16930) LV ( 2)Yb138<br>s( 0.80%)p<br>0.09( 0.07%)d99.99( 99.00%)f<br>0.14( 0.11%)g 0.01( 0.01%)  | 28.18 |

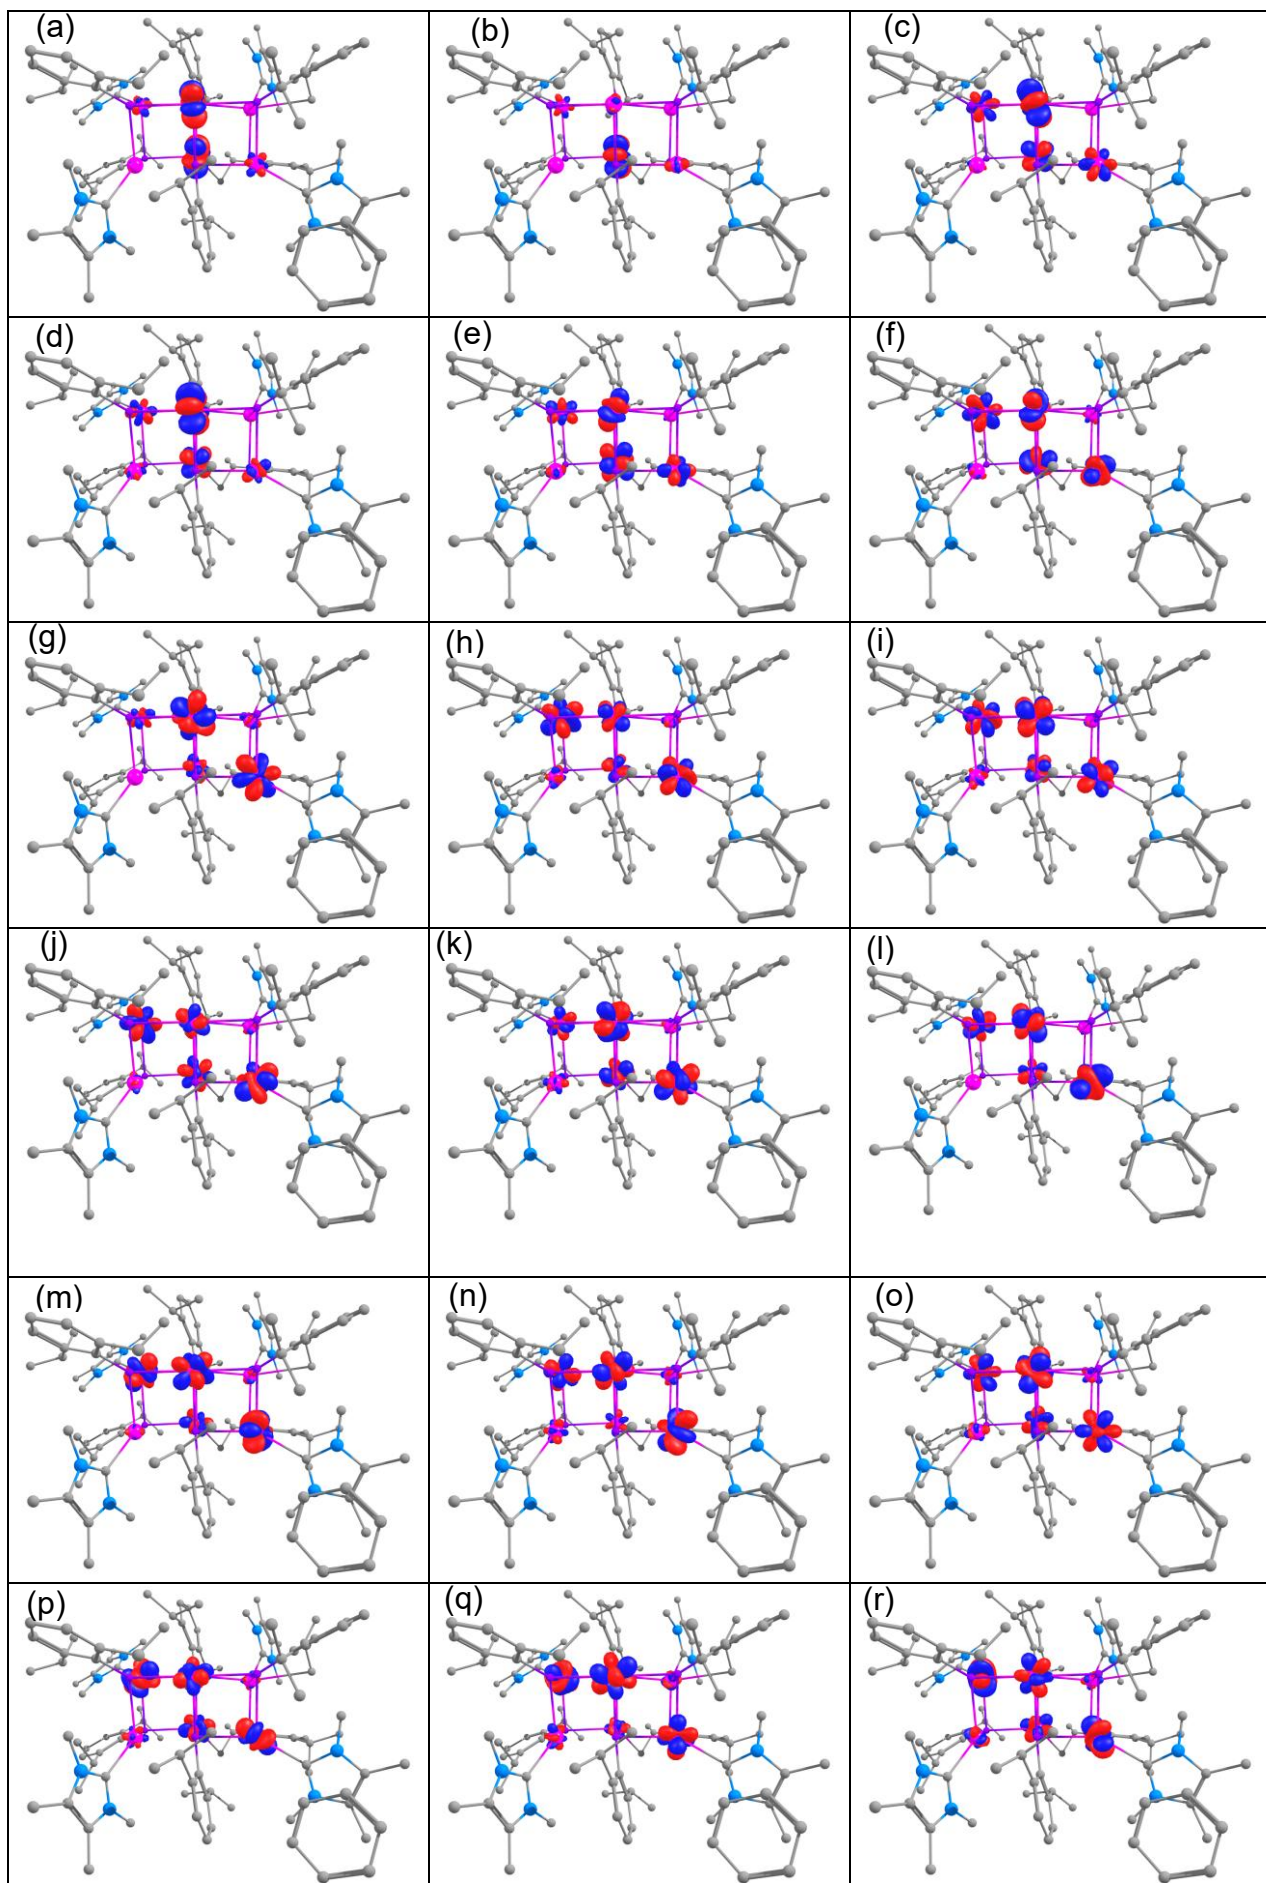

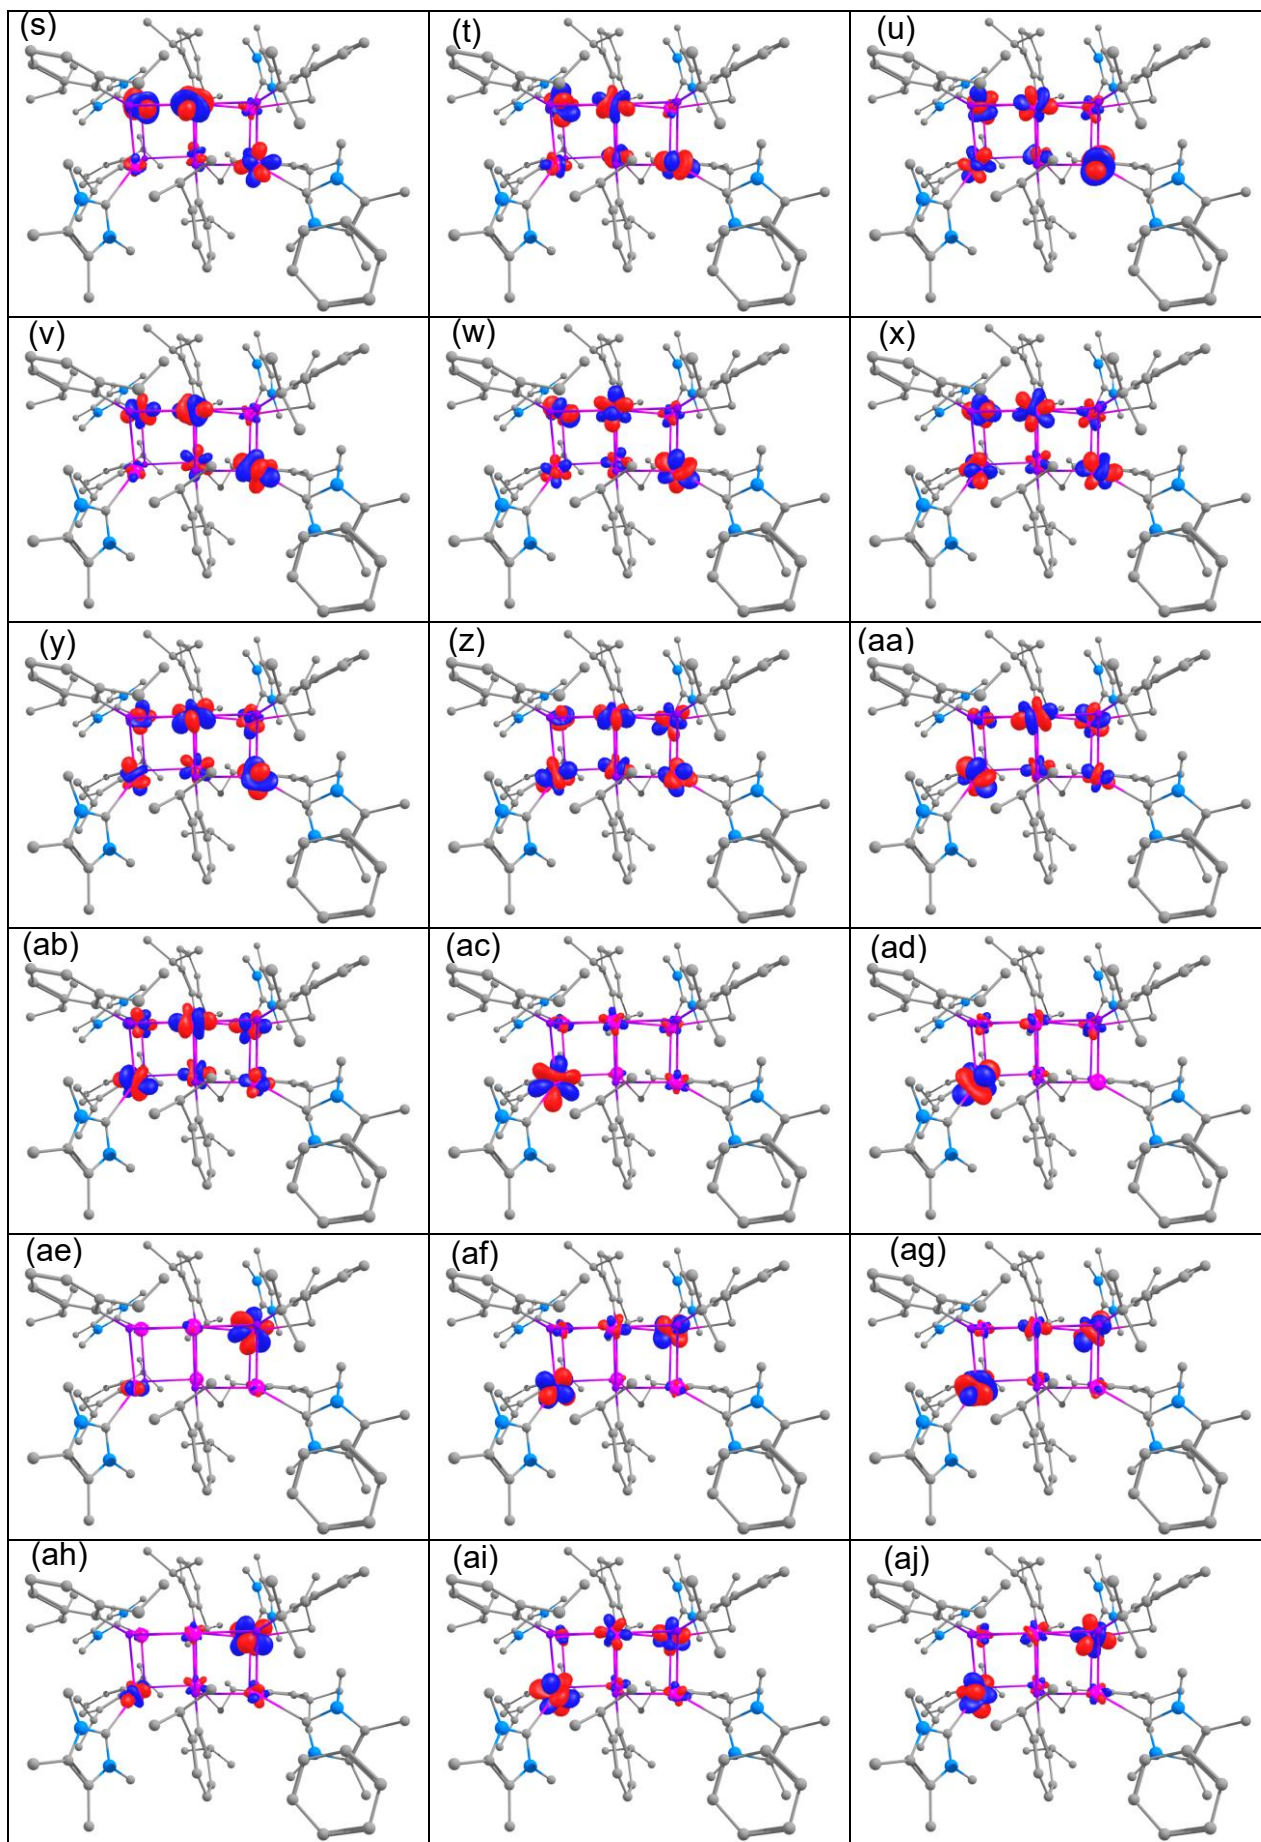

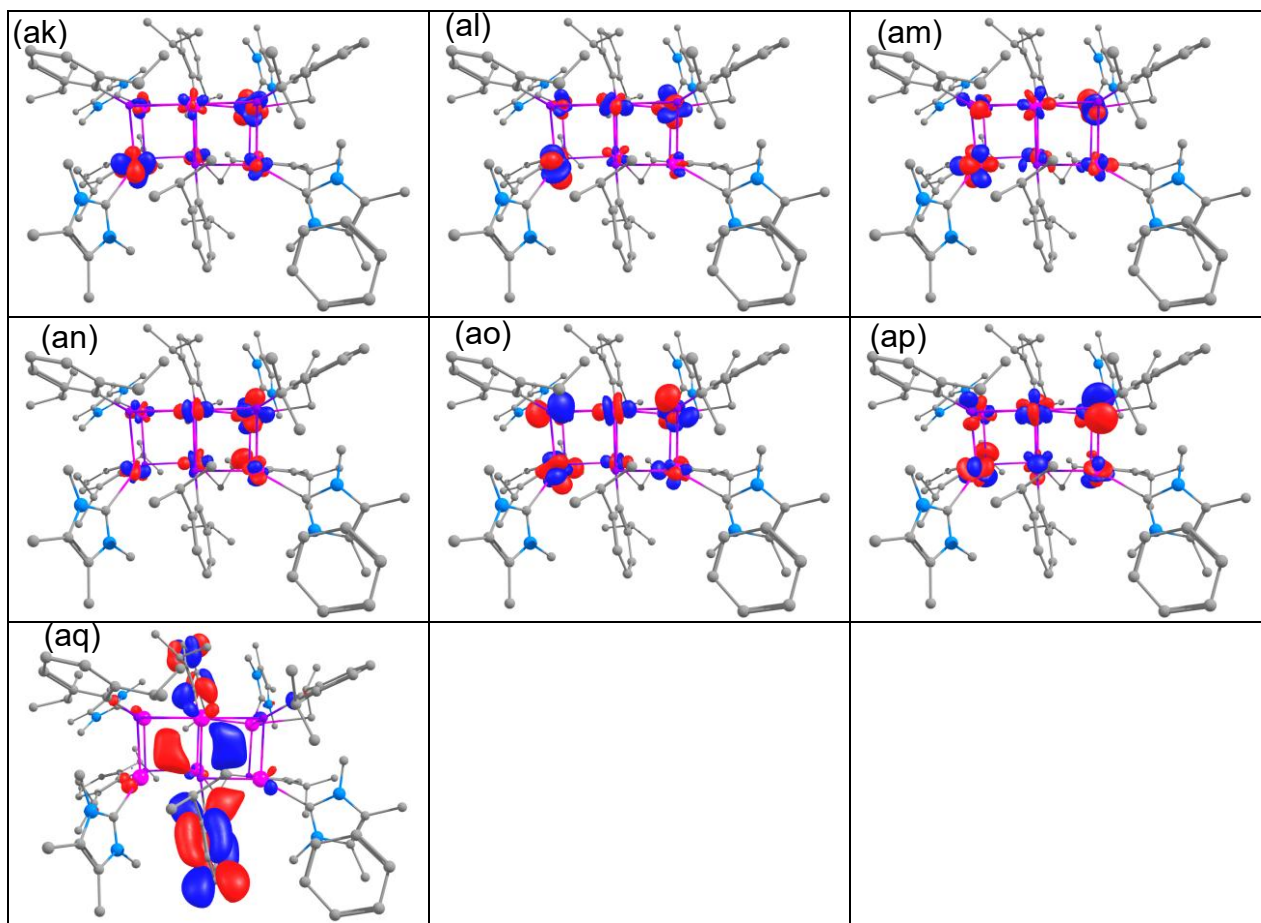

**Fig. S56** Computed MOs for complex **5** (dispersion). (a)HOMO-41 (b)HOMO-40 (c)HOMO-39 (d)HOMO-38 (e)HOMO-37 (f)HOMO-36 (g)HOMO-35 (h)HOMO-34 (i)HOMO-33 (j)HOMO-32 (k)HOMO-31 (l)HOMO-30 (m)HOMO-29 (n)HOMO-28 (o)HOMO-27 (p)HOMO-26 (q)HOMO-25 (r)HOMO-24 (s)HOMO-23 (t)HOMO-22 (u)HOMO-21 (v)HOMO-20 (w)HOMO-19 (x)HOMO-18 (y)HOMO-17 (z)HOMO-16 (aa)HOMO-15 (ab)HOMO-14 (ac)HOMO-13 (ad)HOMO-12 (ae)HOMO-11 (af)HOMO-10 (ag)HOMO-9 (ah)HOMO-8 (ai)HOMO-7 (aj)HOMO-6 (ak)HOMO-5 (al)HOMO-4 (am)HOMO-3 (an)HOMO-2 (ao)HOMO-1 (ap)HOMO (aq)LUMO.

**Table S19** Computed BCP descriptors for complex **5** (dispersion).

| Atom labels | $\rho(r)$ | $\nabla^2\rho(r)$ | $G(r)$ | $V(r)$ | $H(r)$ | $\epsilon$ |
|-------------|-----------|-------------------|--------|--------|--------|------------|
| Yb1-P4      | 0.03      | 0.08              | 0.023  | -0.027 | -0.004 | 0.17       |
| Yb1-P5      | 0.04      | 0.08              | 0.025  | -0.030 | -0.005 | 0.16       |
| Yb1-P139    | 0.03      | 0.08              | 0.023  | -0.027 | -0.004 | 0.15       |
| Yb1-P141    | 0.04      | 0.08              | 0.025  | -0.030 | -0.005 | 0.15       |
| Yb2-P4      | 0.04      | 0.08              | 0.026  | -0.032 | -0.005 | 0.14       |
| Yb2-P5      | 0.04      | 0.09              | 0.028  | -0.034 | -0.006 | 0.20       |

|             |      |      |       |        |        |      |
|-------------|------|------|-------|--------|--------|------|
| Yb2-P6      | 0.04 | 0.08 | 0.030 | -0.033 | -0.006 | 0.19 |
| Yb2-C10     | 0.05 | 0.15 | 0.041 | -0.045 | -0.005 | 0.09 |
| Yb3-P4      | 0.04 | 0.08 | 0.024 | -0.029 | -0.004 | 0.04 |
| Yb3-C71     | 0.04 | 0.14 | 0.039 | -0.044 | -0.005 | 0.07 |
| Yb3-P140    | 0.04 | 0.09 | 0.027 | -0.033 | -0.006 | 0.22 |
| Yb3-P141    | 0.04 | 0.08 | 0.025 | -0.030 | -0.005 | 0.25 |
| Yb136-P4    | 0.04 | 0.08 | 0.024 | -0.029 | -0.005 | 0.13 |
| Yb136-P6    | 0.04 | 0.08 | 0.025 | -0.030 | -0.005 | 0.15 |
| Yb136-P139  | 0.03 | 0.08 | 0.022 | -0.026 | -0.004 | 0.18 |
| Yb136-P140  | 0.04 | 0.08 | 0.024 | -0.029 | -0.005 | 0.19 |
| Yb137-P139  | 0.04 | 0.08 | 0.024 | -0.029 | -0.005 | 0.18 |
| Yb137- P140 | 0.04 | 0.08 | 0.027 | -0.033 | -0.006 | 0.22 |
| Yb137-P141  | 0.04 | 0.08 | 0.026 | -0.032 | -0.006 | 0.17 |
| Yb137-C145  | 0.04 | 0.14 | 0.040 | -0.044 | -0.004 | 0.07 |
| Yb138-P5    | 0.04 | 0.08 | 0.026 | -0.031 | -0.005 | 0.15 |
| Yb138-P6    | 0.04 | 0.08 | 0.025 | -0.030 | -0.006 | 0.25 |
| Yb138-P139  | 0.03 | 0.08 | 0.023 | -0.027 | -0.004 | 0.11 |
| Yb138-C206  | 0.04 | 0.13 | 0.037 | -0.041 | -0.004 | 0.06 |

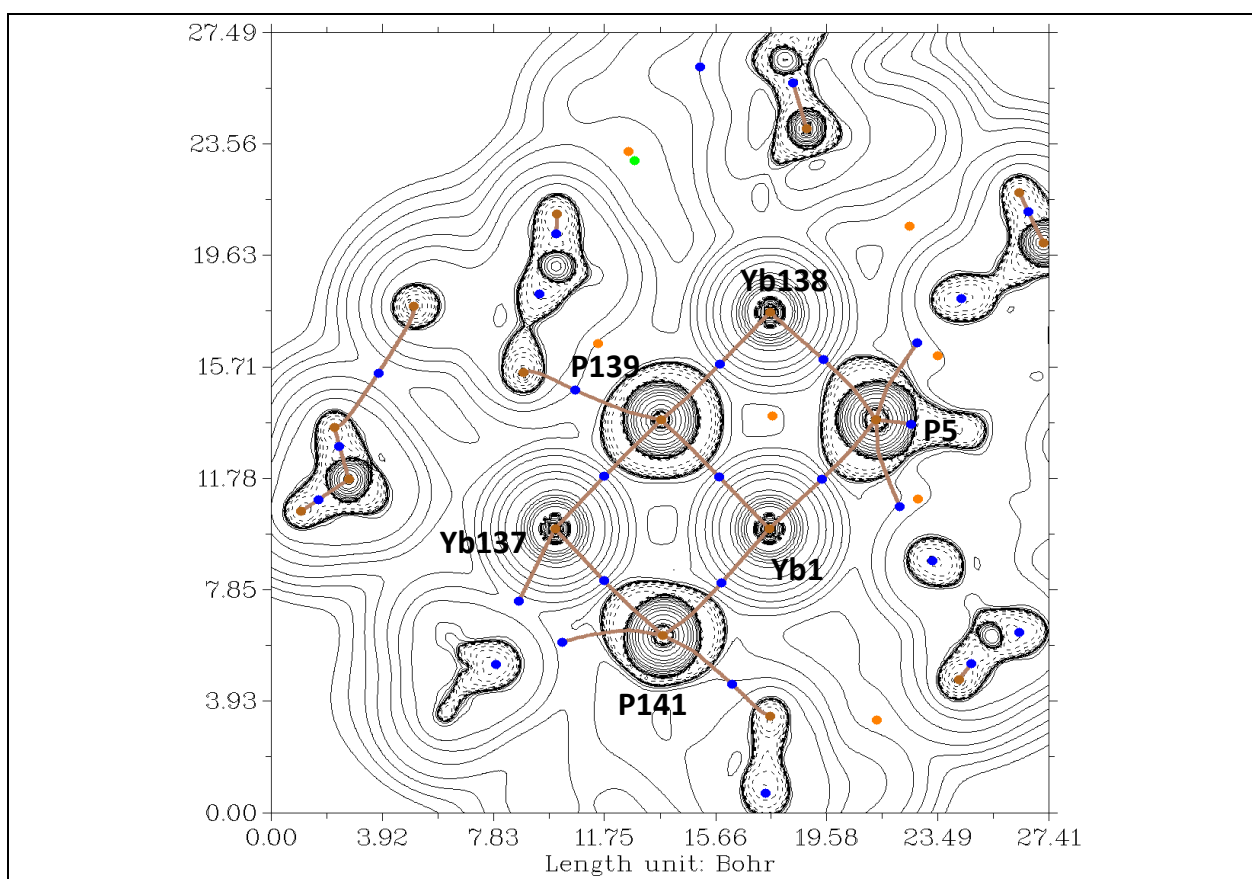

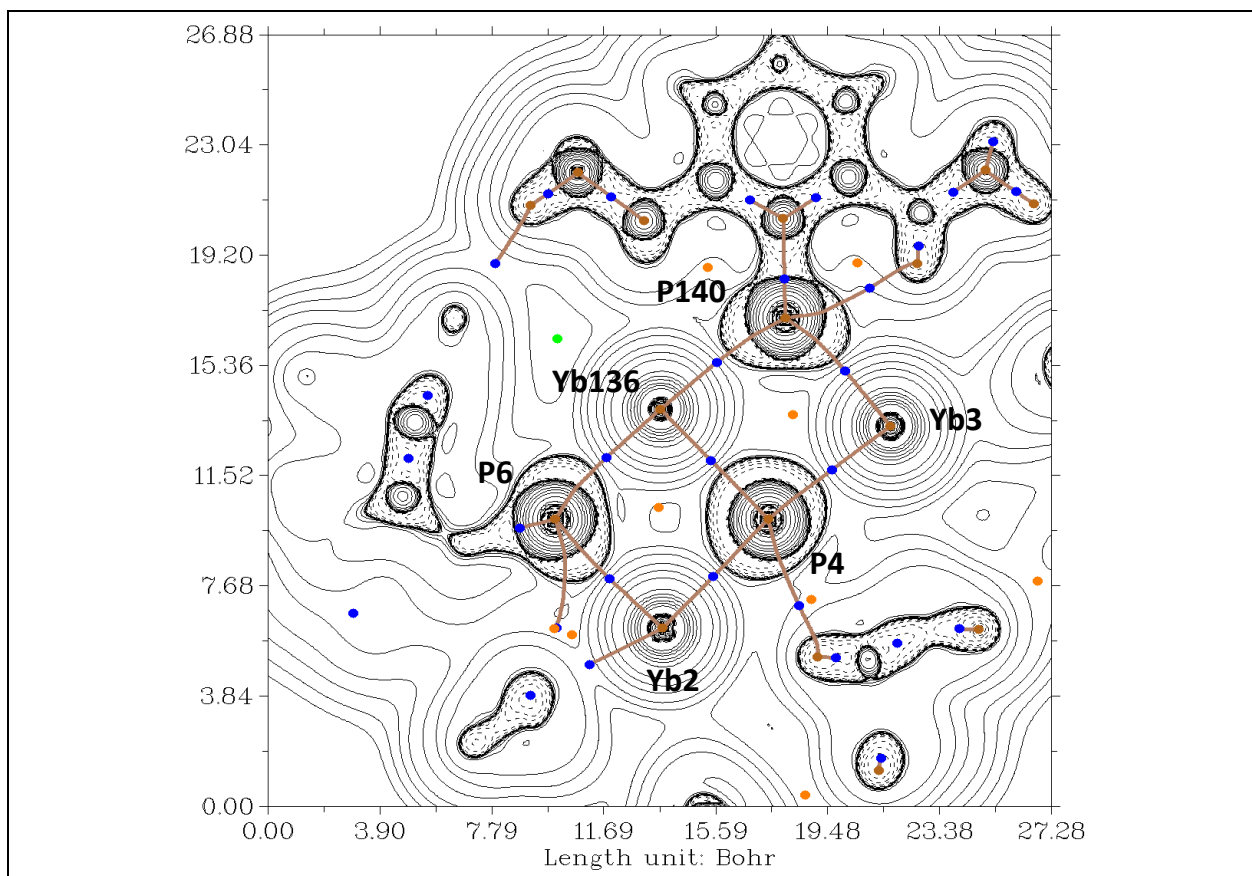

**Fig. S57** Computed Laplacian distribution for complex **5** (dispersion).

**Table S20** Computed energetics (kcal/mol) for different spin states computed for complex **7**.

| Spin states             | $\Delta H$ | $\Delta G$ |
|-------------------------|------------|------------|
| S=1                     | 0.1        | 0.8        |
| S=0, open shell singlet | 0.0        | 0.0        |

**Table S21** Comparison of selected bond distances (Å) between experimental and DFT structures for complex **7**.

| Atom labels | DFT  |                          | X-ray |
|-------------|------|--------------------------|-------|
|             | S=1  | S=0 (open shell singlet) |       |
| Yb3-Yb2     | 3.22 | 3.22                     | 3.19  |
| Yb3-P7      | 2.74 | 2.74                     | 2.72  |
| Yb3-N8      | 2.34 | 2.34                     | 2.30  |
| Yb3-N9      | 2.33 | 2.34                     | 2.28  |
| Yb3-N10     | 2.25 | 2.25                     | 2.23  |
| Yb3-C13     | 2.52 | 2.55                     | 2.50  |
| Yb3-C16     | 2.55 | 2.52                     | 2.49  |
| Yb3-C18     | 2.48 | 2.49                     | 2.45  |

|          |      |      |      |
|----------|------|------|------|
| Yb3-C30  | 2.72 | 2.73 | 2.68 |
| Yb2-Yb1  | 3.59 | 3.58 | 3.56 |
| Yb2-P4   | 2.78 | 2.78 | 2.74 |
| Yb2-P5   | 2.77 | 2.78 | 2.75 |
| Yb2-N11  | 2.18 | 2.18 | 2.17 |
| Yb2-C13  | 2.57 | 2.55 | 2.54 |
| Yb2-C16  | 2.53 | 2.55 | 2.52 |
| Yb2-C30  | 2.40 | 2.40 | 2.36 |
| Yb2-C41  | 2.57 | 2.56 | 2.52 |
| Yb1-P4   | 3.07 | 3.07 | 2.98 |
| Yb1-P5   | 3.08 | 3.08 | 2.98 |
| Yb1-P6   | 2.71 | 2.71 | 2.67 |
| Yb1-C13  | 2.85 | 2.82 | 2.79 |
| Yb1-C16  | 2.85 | 2.88 | 2.91 |
| Yb1-C18  | 2.68 | 2.68 | 2.68 |
| Yb1-C114 | 2.64 | 2.64 | 2.61 |

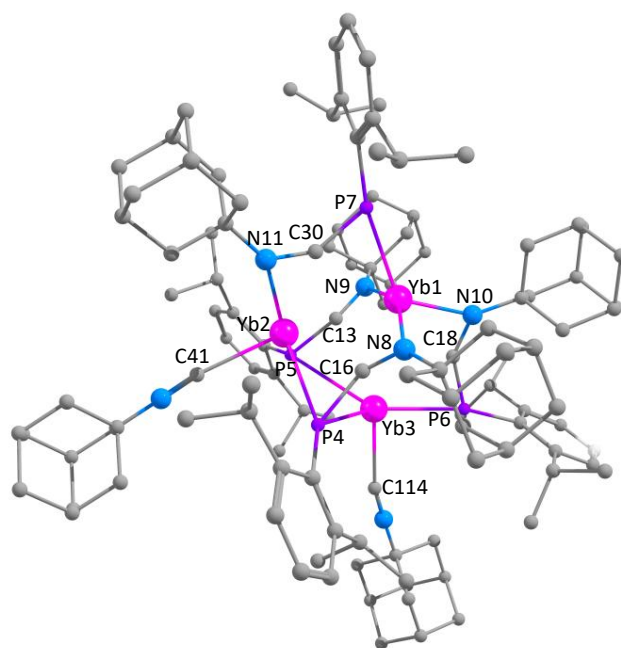

DFT structure of complex 7

***Please note that there is an inconsistency between the atom labels used in the theoretical computations and those from X-ray diffraction, as detailed in the following table.***

**Correspondence between atom labels in theoretical computations and X-ray diffraction.**

| Theoretical Computations | X-ray |
|--------------------------|-------|
| Yb1                      | Yb1   |
| Yb2                      | Yb3   |

|  |      |     |  |
|--|------|-----|--|
|  | Yb3  | Yb2 |  |
|  | P6   | P1  |  |
|  | P7   | P2  |  |
|  | P5   | P3  |  |
|  | P4   | P4  |  |
|  | N10  | N1  |  |
|  | N11  | N2  |  |
|  | N9   | N3  |  |
|  | N8   | N4  |  |
|  | C18  | C1  |  |
|  | C30  | C2  |  |
|  | C13  | C3  |  |
|  | C16  | C4  |  |
|  | C114 | C5  |  |
|  | C41  | C6  |  |

**Table S22** Computed natural charges for selected atoms in complex **7** (S=1).

| Atom labels | Natural charges |
|-------------|-----------------|
| Yb3         | 1.25643         |
| Yb2         | 1.09931         |
| Yb1         | 0.93333         |
| P4          | 0.28010         |
| P5          | 0.27868         |
| P6          | 0.23293         |
| P7          | 0.36433         |
| N8          | -0.56480        |
| N10         | -0.68117        |
| N11         | -0.68925        |
| C13         | -0.46544        |
| C16         | -0.46962        |
| C18         | -0.45443        |
| C30         | -0.44698        |
| C41         | 0.29941         |
| C114        | 0.26721         |

**Table S23** Computed spin densities on selected atoms in complex **7** (S=1).

| Atom labels | Spin densities |  |
|-------------|----------------|--|
| Yb3         | 0.903064       |  |
| Yb2         | 0.905779       |  |
| Yb1         | 0.004959       |  |

|      |           |
|------|-----------|
| P4   | 0.000425  |
| P5   | 0.008581  |
| P6   | 0.002128  |
| P7   | 0.005177  |
| N8   | 0.015512  |
| N10  | 0.010594  |
| N11  | 0.016792  |
| C13  | 0.004327  |
| C16  | 0.006411  |
| C18  | 0.009347  |
| C30  | 0.049838  |
| C41  | -0.001580 |
| C114 | -0.000038 |

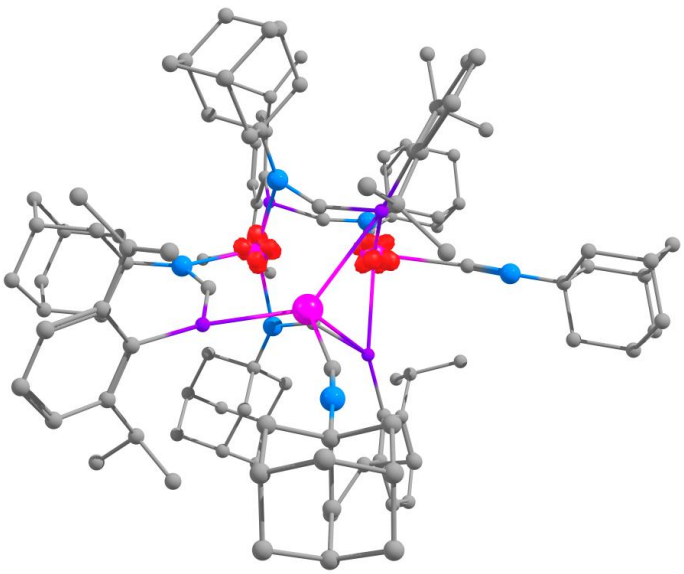

**Table S24** Computed Wiberg bond index between selected atoms in complex **7** (S=1).

| Atom labels | Wiberg bond index |
|-------------|-------------------|
| Yb3-Yb2     | 0.1535            |
| Yb3-P7      | 0.5214            |
| Yb3-N8      | 0.2814            |
| Yb3-N9      | 0.2861            |
| Yb3-N10     | 0.0220            |
| Yb3-C13     | 0.2827            |
| Yb3-C16     | 0.2650            |
| Yb3-C18     | 0.3244            |
| Yb3-C30     | 0.2500            |
| Yb2-Yb1     | 0.0815            |
| Yb2-P4      | 0.4691            |
| Yb2-P5      | 0.4776            |
| Yb2-N11     | 0.4313            |
| Yb2-C13     | 0.3060            |
| Yb2-C16     | 0.3294            |
| Yb2-C30     | 0.3915            |
| Yb2-C41     | 0.3751            |
| Yb1-P4      | 0.2367            |
| Yb1-P5      | 0.2324            |
| Yb1-P6      | 0.4787            |
| Yb1-C13     | 0.1333            |
| Yb1-C16     | 0.1305            |
| Yb1-C18     | 0.2411            |
| Yb1-C114    | 0.3256            |

NBO analysis (Alpha Molecular Orbitals) for bonding orbitals in Yb1 (S=1).

(0.96691) BD ( 1)Yb 3- P 7  
 ( 12.74%) 0.3569\*Yb 3 s( 40.94%)p 0.01( 0.33%)d 1.43( 58.49%) f 0.01( 0.21%)g  
 0.00( 0.04%)  
 ( 87.26%) 0.9341\* P 7 s( 52.09%)p 0.92( 47.88%)d 0.00( 0.02%)  
 (0.95810) BD ( 1)Yb 3- N 10  
 ( 8.01%) 0.2829\*Yb 3 s( 33.96%)p 0.01( 0.43%)d 1.92( 65.23%) f 0.01( 0.31%)g  
 0.00( 0.07%)  
 ( 91.99%) 0.9591\* N 10 s( 29.75%)p 2.36( 70.23%)d 0.00( 0.02%)  
 (0.96407) BD ( 1)Yb 2- N 11  
 ( 9.17%) 0.3028\*Yb 2 s( 24.12%)p 0.01( 0.19%)d 3.12( 75.34%) f 0.01( 0.29%)g  
 0.00( 0.06%)  
 ( 90.83%) 0.9531\* N 11 s( 30.24%)p 2.31( 69.75%)d 0.00( 0.02%)  
 (0.98567) BD ( 1)Yb 2- C 41  
 ( 12.09%) 0.3477\*Yb 2 s( 35.70%)p 0.00( 0.12%)d 1.79( 64.05%) f 0.00( 0.12%)g  
 0.00( 0.02%)  
 ( 87.91%) 0.9376\* C 41 s( 65.11%)p 0.54( 34.88%)d 0.00( 0.01%)  
 (0.96375) BD ( 1)Yb 1- P 6  
 ( 10.25%) 0.3202\*Yb 1 s( 26.13%)p 0.00( 0.12%)d 2.81( 73.49%) f 0.01( 0.24%)g  
 0.00( 0.01%)  
 ( 89.75%) 0.9474\* P 6 s( 51.30%)p 0.95( 48.67%)d 0.00( 0.03%)  
 (0.98727) BD ( 1)Yb 1- C114  
 ( 9.28%) 0.3046\*Yb 1 s( 38.24%)p 0.00( 0.16%)d 1.60( 61.36%) f 0.01( 0.23%)g  
 0.00( 0.01%)  
 ( 90.72%) 0.9525\* C114 s( 65.15%)p 0.53( 34.83%)d 0.00( 0.01%)  
 (0.97671) 3C ( 1)Yb 3- P 7- C 30  
 ( 5.08%) 0.2255\*Yb 3 s( 0.22%)p 2.03( 0.45%)d99.99( 98.94%)f 1.37( 0.30%)g  
 0.37( 0.08%)  
 ( 65.78%) 0.8111\* P 7 s( 0.01%)p99.99( 99.74%)d16.17( 0.24%)  
 ( 29.13%) 0.5398\* C 30 s( 0.09%)p99.99( 99.82%)d 1.13( 0.10%)

**Table S25** DFT computed NBO second order perturbation analysis (Alpha Molecular Orbitals)

for complex **7** (S=1).

| Donor NBO                                                           | Acceptor NBO                                                                                      | E(2)<br>kcal/mol |
|---------------------------------------------------------------------|---------------------------------------------------------------------------------------------------|------------------|
| (0.73591) LP ( 1) P 6<br>s( 0.00%)p 1.00( 99.87%)d<br>0.00( 0.13%)  | (0.12034) LV ( 1)Yb 1<br>s( 0.01%)p<br>1.00( 0.12%)d99.99( 99.81%)f<br>0.48( 0.06%)g 0.10( 0.01%) | 13.76            |
| (0.73902) LP ( 1) N 11<br>s( 0.00%)p 1.00( 99.94%)d<br>0.00( 0.06%) | (0.16225) LV ( 1)Yb 2                                                                             | 4.94             |

|                                                                      |                                                                                                                                                                                                           |       |
|----------------------------------------------------------------------|-----------------------------------------------------------------------------------------------------------------------------------------------------------------------------------------------------------|-------|
|                                                                      | s( 0.06%)p<br>2.08( 0.12%)d99.99( 99.74%)f<br>1.38( 0.08%)g 0.25( 0.01%)                                                                                                                                  |       |
| (0.73902) LP ( 1) N 11<br>s( 0.00%)p 1.00( 99.94%)d<br>0.00( 0.06%)  | (0.12161) LV ( 3)Yb 2<br>s( 0.85%)p<br>0.60( 0.51%)d99.99( 98.50%)f<br>0.15( 0.13%)g 0.01( 0.01%)                                                                                                         | 5.56  |
| (0.75989) LP ( 1) C 18<br>s( 38.50%)p 1.60( 61.49%)d<br>0.00( 0.01%) | (0.11979) LV ( 2)Yb 3<br>s( 0.06%)p<br>1.75( 0.11%)d99.99( 99.68%)f<br>2.17( 0.13%)g 0.20( 0.01%)                                                                                                         | 26.27 |
| (0.75989) LP ( 1) C 18<br>s( 38.50%)p 1.60( 61.49%)d<br>0.00( 0.01%) | (0.07509) LV ( 2)Yb 1<br>s( 17.64%)p 0.03( 0.54%)d<br>4.62( 81.48%)f 0.02( 0.31%)g<br>0.00( 0.03%)                                                                                                        | 12.82 |
| (0.75989) LP ( 1) C 18<br>s( 38.50%)p 1.60( 61.49%)d<br>0.00( 0.01%) | (0.09241) BD*( 1)Yb 3- P 7<br>( 87.26%) 0.9341*Yb 3<br>s( 40.94%)p 0.01( 0.33%)d<br>1.43( 58.49%)f 0.01( 0.21%)g<br>0.00( 0.04%)<br>( 12.74%) -0.3569* P 7<br>s( 52.09%)p 0.92( 47.88%)d<br>0.00( 0.02%)  | 28.69 |
| (0.74780) LP ( 1) C 30<br>s( 40.14%)p 1.49( 59.85%)d<br>0.00( 0.02%) | (0.11979) LV ( 2)Yb 3<br>s( 0.06%)p<br>1.75( 0.11%)d99.99( 99.68%)f<br>2.17( 0.13%)g 0.20( 0.01%)                                                                                                         | 21.04 |
| (0.74780) LP ( 1) C 30<br>s( 40.14%)p 1.49( 59.85%)d<br>0.00( 0.02%) | (0.14701) LV ( 2)Yb 2<br>s( 23.61%)p 0.01( 0.32%)d<br>3.21( 75.82%)f 0.01( 0.24%)g<br>0.00( 0.01%)                                                                                                        | 18.22 |
| (0.74780) LP ( 1) C 30<br>s( 40.14%)p 1.49( 59.85%)d<br>0.00( 0.02%) | (0.10856) LV ( 4)Yb 2<br>s( 13.33%)p 0.02( 0.33%)d<br>6.47( 86.22%)f 0.01( 0.11%)g<br>0.00( 0.02%)                                                                                                        | 11.10 |
| (0.74780) LP ( 1) C 30<br>s( 40.14%)p 1.49( 59.85%)d<br>0.00( 0.02%) | (0.08874) BD*( 1)Yb 3- N 10<br>( 91.99%) 0.9591*Yb 3<br>s( 33.96%)p 0.01( 0.43%)d<br>1.92( 65.23%)f 0.01( 0.31%)g<br>0.00( 0.07%)<br>( 8.01%) -0.2829* N 10<br>s( 29.75%)p 2.36( 70.23%)d<br>0.00( 0.02%) | 15.44 |

|                                                                                                                                                                        |                                                                                                                                                                                                            |       |
|------------------------------------------------------------------------------------------------------------------------------------------------------------------------|------------------------------------------------------------------------------------------------------------------------------------------------------------------------------------------------------------|-------|
| (0.74780) LP ( 1) C 30<br>s( 40.14%)p 1.49( 59.85%)d<br>0.00( 0.02%)                                                                                                   | (0.08329) BD*( 1)Yb 2- C 41<br>( 87.91%) 0.9376*Yb 2<br>s( 35.70%)p 0.00( 0.12%)d<br>1.79( 64.05%)f 0.00( 0.12%)g<br>0.00( 0.02%)<br>( 12.09%) -0.3477* C 41<br>s( 65.11%)p 0.54( 34.88%)d<br>0.00( 0.01%) | 11.96 |
| (0.97244) BD ( 1) P 6- C 18<br>( 36.16%) 0.6014* P 6 s( 23.37%)p<br>3.25( 75.94%)d 0.03( 0.69%)<br>( 63.84%) 0.7990* C 18 s( 34.06%)p<br>1.93( 65.88%)d 0.00( 0.06%)   | (0.07509) LV ( 2)Yb 1<br>s( 17.64%)p 0.03( 0.54%)d<br>4.62( 81.48%)f 0.02( 0.31%)g<br>0.00( 0.03%)                                                                                                         | 5.81  |
| (0.97299) BD ( 1) P 7- C 30<br>( 34.63%) 0.5884* P 7 s( 22.41%)p<br>3.43( 76.81%)d 0.03( 0.78%)<br>( 65.37%) 0.8085* C 30 s( 33.93%)p<br>1.95( 66.02%)d 0.00( 0.05%)   | (0.11979) LV ( 2)Yb 3<br>s( 0.06%)p<br>1.75( 0.11%)d99.99( 99.68%)f<br>2.17( 0.13%)g 0.20( 0.01%)                                                                                                          | 8.08  |
| (0.98648) BD ( 1) N 10- C 18<br>( 60.71%) 0.7791* N 10 s( 35.70%)p<br>1.80( 64.18%)d 0.00( 0.12%)<br>( 39.29%) 0.6268* C 18 s( 27.04%)p<br>2.69( 72.84%)d 0.00( 0.12%) | (0.11979) LV ( 2)Yb 3<br>s( 0.06%)p<br>1.75( 0.11%)d99.99( 99.68%)f<br>2.17( 0.13%)g 0.20( 0.01%)                                                                                                          | 9.18  |
| (0.98595) BD ( 1) N 11- C 30<br>( 60.47%) 0.7776* N 11 s( 34.69%)p<br>1.88( 65.19%)d 0.00( 0.12%)<br>( 39.53%) 0.6288* C 30 s( 25.60%)p<br>2.90( 74.28%)d 0.00( 0.12%) | (0.10856) LV ( 4)Yb 2<br>s( 13.33%)p 0.02( 0.33%)d<br>6.47( 86.22%)f 0.01( 0.11%)g<br>0.00( 0.02%)                                                                                                         | 6.60  |
| (0.80245) LP ( 1) P 4<br>s( 42.17%)p 1.37( 57.75%)d<br>0.00( 0.08%)                                                                                                    | (0.16225) LV ( 1)Yb 2<br>s( 0.06%)p<br>2.08( 0.12%)d99.99( 99.74%)f<br>1.38( 0.08%)g 0.25( 0.01%)                                                                                                          | 17.58 |
| (0.80245) LP ( 1) P 4<br>s( 42.17%)p 1.37( 57.75%)d<br>0.00( 0.08%)                                                                                                    | (0.14701) LV ( 2)Yb 2<br>s( 23.61%)p 0.01( 0.32%)d<br>3.21( 75.82%)f 0.01( 0.24%)g<br>0.00( 0.01%)                                                                                                         | 9.66  |
| (0.80245) LP ( 1) P 4<br>s( 42.17%)p 1.37( 57.75%)d<br>0.00( 0.08%)                                                                                                    | (0.12034) LV ( 1)Yb 1<br>s( 0.01%)p<br>1.00( 0.12%)d99.99( 99.81%)f<br>0.48( 0.06%)g 0.10( 0.01%)                                                                                                          | 11.73 |
| (0.72566) LP ( 2) P 4<br>s( 1.17%)p84.56( 98.65%)d<br>0.16( 0.18%)                                                                                                     | (0.16225) LV ( 1)Yb 2                                                                                                                                                                                      | 8.88  |

|                                                                                                                                                                      |                                                                                                                                                                                                           |       |
|----------------------------------------------------------------------------------------------------------------------------------------------------------------------|-----------------------------------------------------------------------------------------------------------------------------------------------------------------------------------------------------------|-------|
|                                                                                                                                                                      | s( 0.06%)p<br>2.08( 0.12%)d99.99( 99.74%)f<br>1.38( 0.08%)g 0.25( 0.01%)                                                                                                                                  |       |
| (0.72566) LP ( 2) P 4<br>s( 1.17%)p84.56( 98.65%)d<br>0.16( 0.18%)                                                                                                   | (0.14701) LV ( 2)Yb 2<br>s( 23.61%)p 0.01( 0.32%)d<br>3.21( 75.82%)f 0.01( 0.24%)g<br>0.00( 0.01%)                                                                                                        | 8.15  |
| (0.72566) LP ( 2) P 4<br>s( 1.17%)p84.56( 98.65%)d<br>0.16( 0.18%)                                                                                                   | (0.10856) LV ( 4)Yb 2<br>s( 13.33%)p 0.02( 0.33%)d<br>6.47( 86.22%)f 0.01( 0.11%)g<br>0.00( 0.02%)                                                                                                        | 8.00  |
| (0.88952) LP ( 1) N 8<br>s( 32.09%)p 2.12( 67.88%)d<br>0.00( 0.03%)                                                                                                  | (0.13509) LV ( 1)Yb 3<br>s( 21.67%)p 0.02( 0.53%)d<br>3.58( 77.48%)f 0.01( 0.24%)g<br>0.00( 0.07%)                                                                                                        | 32.72 |
| (0.71793) LP ( 1) C 16<br>s( 46.08%)p 1.17( 53.92%)d<br>0.00( 0.01%)                                                                                                 | (0.10352) LV ( 3)Yb 3<br>s( 0.22%)p<br>2.83( 0.62%)d99.99( 99.00%)f<br>0.68( 0.15%)g 0.05( 0.01%)                                                                                                         | 19.80 |
| (0.71793) LP ( 1) C 16<br>s( 46.08%)p 1.17( 53.92%)d<br>0.00( 0.01%)                                                                                                 | (0.12161) LV ( 3)Yb 2<br>s( 0.85%)p<br>0.60( 0.51%)d99.99( 98.50%)f<br>0.15( 0.13%)g 0.01( 0.01%)                                                                                                         | 20.00 |
| (0.71793) LP ( 1) C 16<br>s( 46.08%)p 1.17( 53.92%)d<br>0.00( 0.01%)                                                                                                 | (0.05598) BD*( 1)Yb 1- C114<br>( 90.72%) 0.9525*Yb 1<br>s( 38.24%)p 0.00( 0.16%)d<br>1.60( 61.36%)f 0.01( 0.23%)g<br>0.00( 0.01%)<br>( 9.28%) -0.3046* C114<br>s( 65.15%)p 0.53( 34.83%)d<br>0.00( 0.01%) | 7.65  |
| (0.96244) BD ( 1) P 4- C 16<br>( 36.59%) 0.6049* P 4 s( 17.08%)p<br>4.82( 82.26%)d 0.04( 0.67%)<br>( 63.41%) 0.7963* C 16 s( 28.42%)p<br>2.52( 71.52%)d 0.00( 0.06%) | (0.12161) LV ( 3)Yb 2<br>s( 0.85%)p<br>0.60( 0.51%)d99.99( 98.50%)f<br>0.15( 0.13%)g 0.01( 0.01%)                                                                                                         | 8.21  |
| (0.98575) BD ( 1) N 8- C 16<br>( 59.94%) 0.7742* N 8 s( 33.97%)p<br>1.94( 65.88%)d 0.00( 0.15%)<br>( 40.06%) 0.6329* C 16 s( 25.10%)p<br>2.98( 74.78%)d 0.00( 0.12%) | (0.13509) LV ( 1)Yb 3<br>s( 21.67%)p 0.02( 0.53%)d<br>3.58( 77.48%)f 0.01( 0.24%)g<br>0.00( 0.07%)                                                                                                        | 6.19  |
| (0.98575) BD ( 1) N 8- C 16                                                                                                                                          | (0.10352) LV ( 3)Yb 3                                                                                                                                                                                     | 6.62  |

|                                                                                                                                       |                                                                                                    |       |
|---------------------------------------------------------------------------------------------------------------------------------------|----------------------------------------------------------------------------------------------------|-------|
| ( 59.94%) 0.7742* N 8 s( 33.97%)p<br>1.94( 65.88%)d 0.00( 0.15%)<br>( 40.06%) 0.6329* C 16 s( 25.10%)p<br>2.98( 74.78%)d 0.00( 0.12%) | s( 0.22%)p<br>2.83( 0.62%)d99.99( 99.00%)f<br>0.68( 0.15%)g 0.05( 0.01%)                           |       |
| (0.80497) LP ( 1) P 5<br>s( 42.26%)p 1.36( 57.66%)d<br>0.00( 0.08%)                                                                   | (0.16225) LV ( 1)Yb 2<br>s( 0.06%)p<br>2.08( 0.12%)d99.99( 99.74%)f<br>1.38( 0.08%)g 0.25( 0.01%)  | 13.88 |
| (0.80497) LP ( 1) P 5<br>s( 42.26%)p 1.36( 57.66%)d<br>0.00( 0.08%)                                                                   | (0.14701) LV ( 2)Yb 2<br>s( 23.61%)p 0.01( 0.32%)d<br>3.21( 75.82%)f 0.01( 0.24%)g<br>0.00( 0.01%) | 13.66 |
| (0.80497) LP ( 1) P 5<br>s( 42.26%)p 1.36( 57.66%)d<br>0.00( 0.08%)                                                                   | (0.12034) LV ( 1)Yb 1<br>s( 0.01%)p<br>1.00( 0.12%)d99.99( 99.81%)f<br>0.48( 0.06%)g 0.10( 0.01%)  | 11.04 |
| (0.72997) LP ( 2) P 5<br>s( 1.15%)p85.54( 98.67%)d<br>0.16( 0.18%)                                                                    | (0.16225) LV ( 1)Yb 2<br>s( 0.06%)p<br>2.08( 0.12%)d99.99( 99.74%)f<br>1.38( 0.08%)g 0.25( 0.01%)  | 9.19  |
| (0.72997) LP ( 2) P 5<br>s( 1.15%)p85.54( 98.67%)d<br>0.16( 0.18%)                                                                    | (0.14701) LV ( 2)Yb 2<br>s( 23.61%)p 0.01( 0.32%)d<br>3.21( 75.82%)f 0.01( 0.24%)g<br>0.00( 0.01%) | 9.40  |
| (0.72997) LP ( 2) P 5<br>s( 1.15%)p85.54( 98.67%)d<br>0.16( 0.18%)                                                                    | (0.10856) LV ( 4)Yb 2<br>s( 13.33%)p 0.02( 0.33%)d<br>6.47( 86.22%)f 0.01( 0.11%)g<br>0.00( 0.02%) | 7.02  |
| (0.85624) LP ( 1) N 9<br>s( 42.26%)p 1.37( 57.71%)d<br>0.00( 0.03%)                                                                   | (0.13509) LV ( 1)Yb 3<br>s( 21.67%)p 0.02( 0.53%)d<br>3.58( 77.48%)f 0.01( 0.24%)g<br>0.00( 0.07%) | 34.74 |
| (0.71624) LP ( 1) C 13<br>s( 46.16%)p 1.17( 53.83%)d<br>0.00( 0.01%)                                                                  | (0.11979) LV ( 2)Yb 3<br>s( 0.06%)p<br>1.75( 0.11%)d99.99( 99.68%)f<br>2.17( 0.13%)g 0.20( 0.01%)  | 10.54 |
| (0.71624) LP ( 1) C 13<br>s( 46.16%)p 1.17( 53.83%)d<br>0.00( 0.01%)                                                                  | (0.10352) LV ( 3)Yb 3<br>s( 0.22%)p<br>2.83( 0.62%)d99.99( 99.00%)f<br>0.68( 0.15%)g 0.05( 0.01%)  | 14.05 |
| (0.71624) LP ( 1) C 13<br>s( 46.16%)p 1.17( 53.83%)d<br>0.00( 0.01%)                                                                  | (0.12161) LV ( 3)Yb 2                                                                              | 18.48 |

|                                                                                                                                                                      |                                                                                                                                                                                                            |      |
|----------------------------------------------------------------------------------------------------------------------------------------------------------------------|------------------------------------------------------------------------------------------------------------------------------------------------------------------------------------------------------------|------|
|                                                                                                                                                                      | s( 0.85%)p<br>0.60( 0.51%)d99.99( 98.50%)f<br>0.15( 0.13%)g 0.01( 0.01%)                                                                                                                                   |      |
| (0.71624) LP ( 1) C 13<br>s( 46.16%)p 1.17( 53.83%)d<br>0.00( 0.01%)                                                                                                 | (0.10856) LV ( 4)Yb 2<br>s( 13.33%)p 0.02( 0.33%)d<br>6.47( 86.22%)f 0.01( 0.11%)g<br>0.00( 0.02%)                                                                                                         | 8.79 |
| (0.71624) LP ( 1) C 13<br>s( 46.16%)p 1.17( 53.83%)d<br>0.00( 0.01%)                                                                                                 | (0.08329) BD*( 1)Yb 2- C 41<br>( 87.91%) 0.9376*Yb 2<br>s( 35.70%)p 0.00( 0.12%)d<br>1.79( 64.05%)f 0.00( 0.12%)g<br>0.00( 0.02%)<br>( 12.09%) -0.3477* C 41<br>s( 65.11%)p 0.54( 34.88%)d<br>0.00( 0.01%) | 6.79 |
| (0.71624) LP ( 1) C 13<br>s( 46.16%)p 1.17( 53.83%)d<br>0.00( 0.01%)                                                                                                 | (0.05598) BD*( 1)Yb 1- C114<br>( 90.72%) 0.9525*Yb 1<br>s( 38.24%)p 0.00( 0.16%)d<br>1.60( 61.36%)f 0.01( 0.23%)g<br>0.00( 0.01%)<br>( 9.28%) -0.3046* C114<br>s( 65.15%)p 0.53( 34.83%)d<br>0.00( 0.01%)  | 7.93 |
| (0.96311) BD ( 1) P 5- C 13<br>( 36.58%) 0.6048* P 5 s( 17.82%)p<br>4.57( 81.51%)d 0.04( 0.67%)<br>( 63.42%) 0.7964* C 13 s( 28.34%)p<br>2.53( 71.60%)d 0.00( 0.05%) | (0.12161) LV ( 3)Yb 2<br>s( 0.85%)p<br>0.60( 0.51%)d99.99( 98.50%)f<br>0.15( 0.13%)g 0.01( 0.01%)                                                                                                          | 6.95 |
| (0.98803) BD ( 1) N 9- C 13<br>( 61.88%) 0.7866* N 9 s( 21.62%)p<br>3.62( 78.23%)d 0.01( 0.15%)<br>( 38.12%) 0.6174* C 13 s( 25.10%)p<br>2.98( 74.77%)d 0.00( 0.12%) | (0.13509) LV ( 1)Yb 3<br>s( 21.67%)p 0.02( 0.53%)d<br>3.58( 77.48%)f 0.01( 0.24%)g<br>0.00( 0.07%)                                                                                                         | 5.83 |

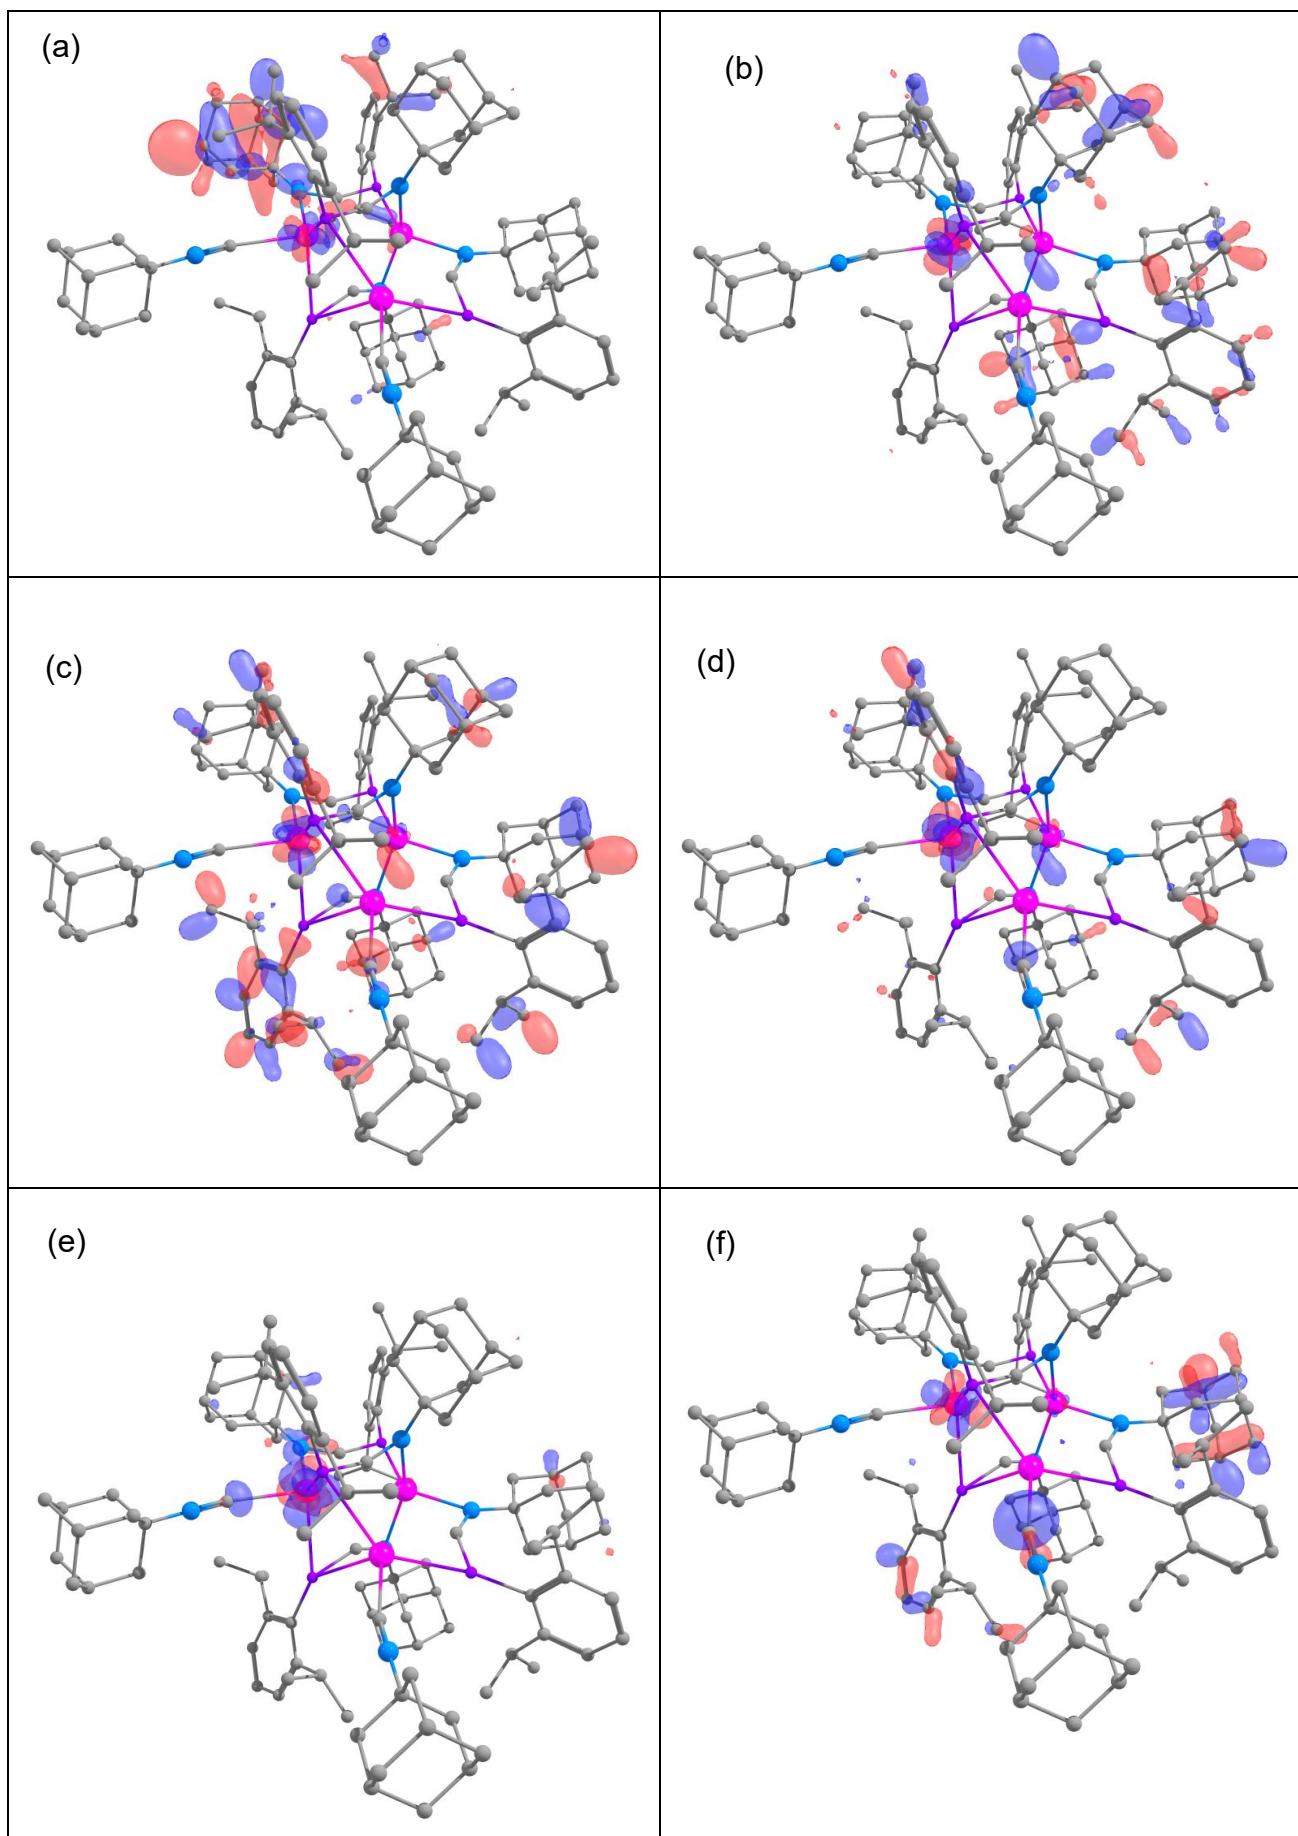

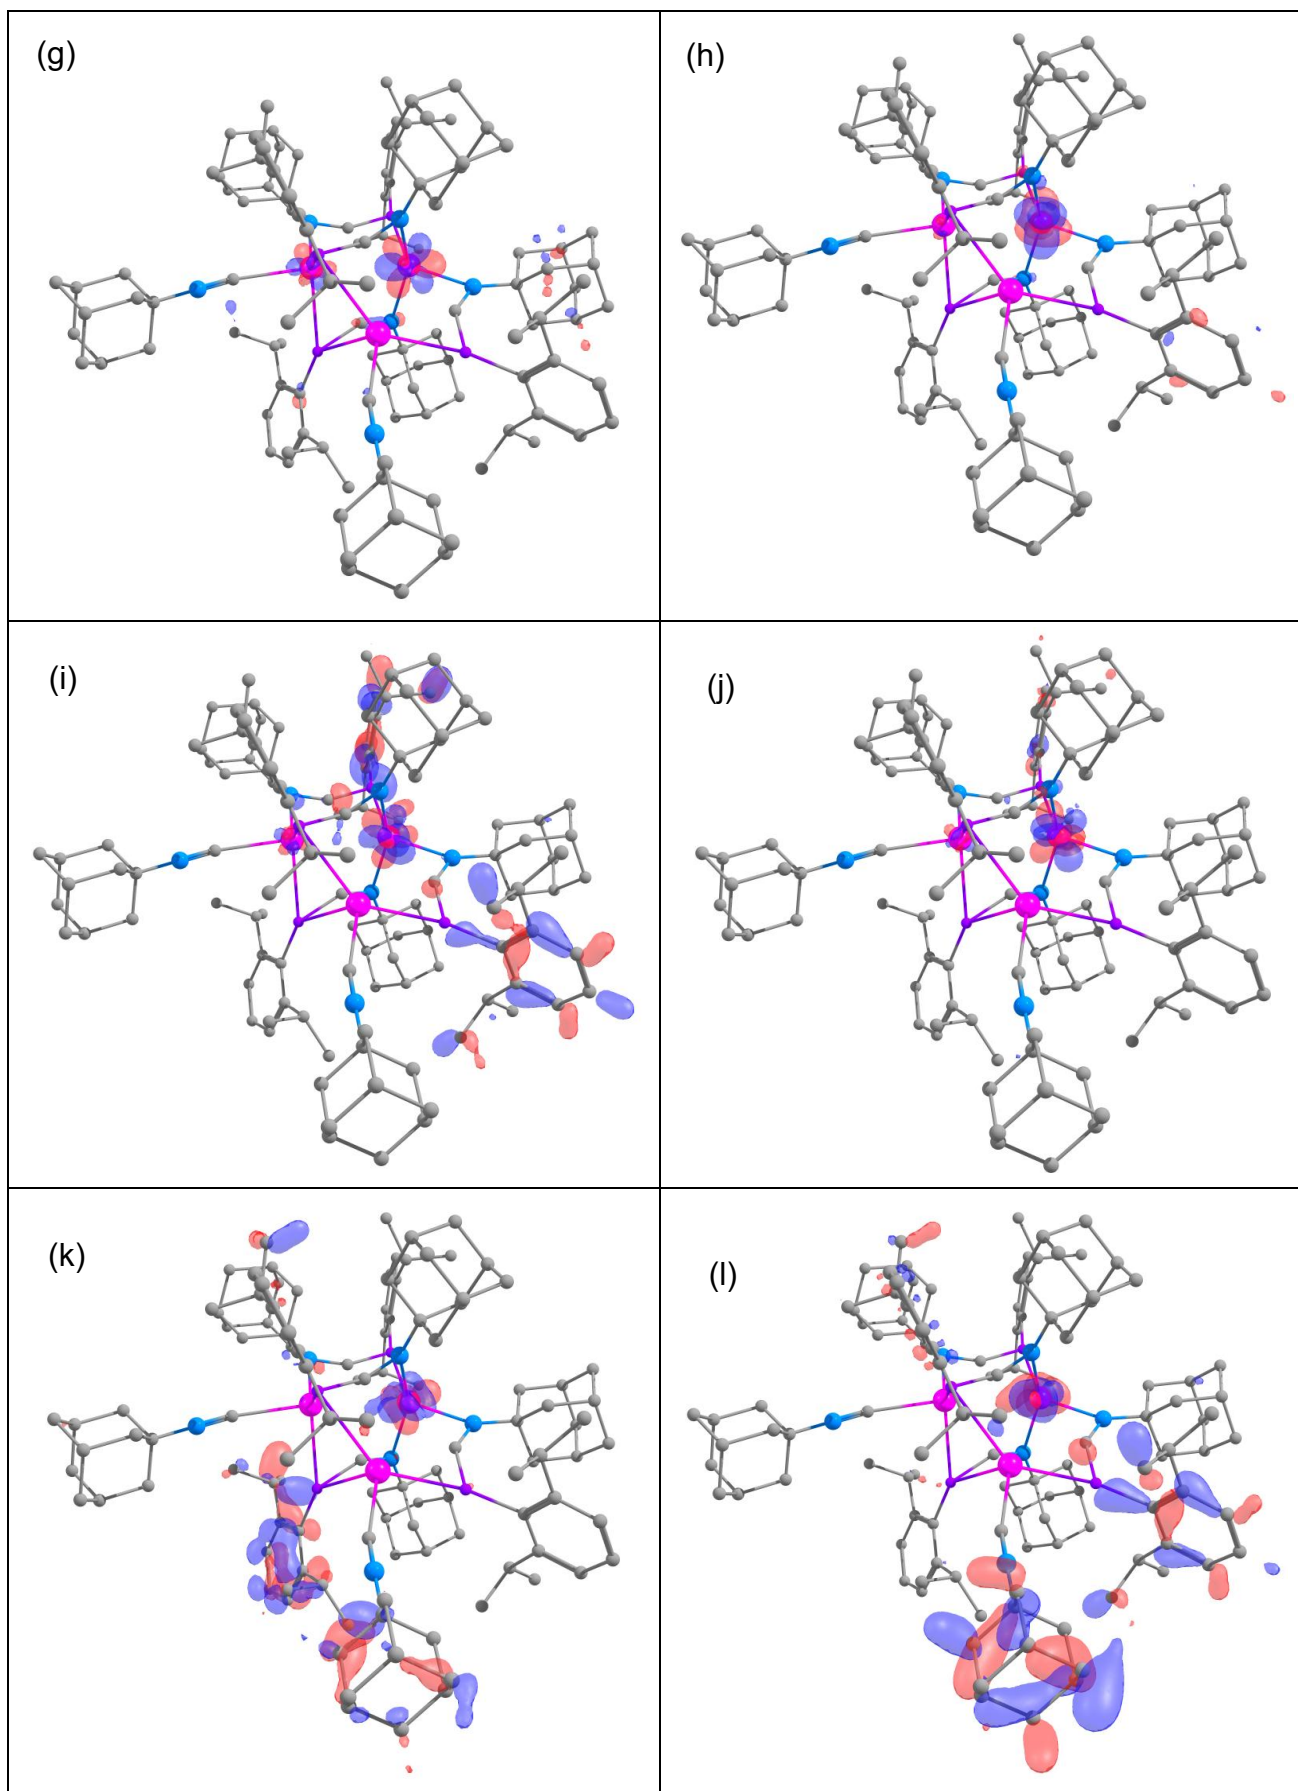

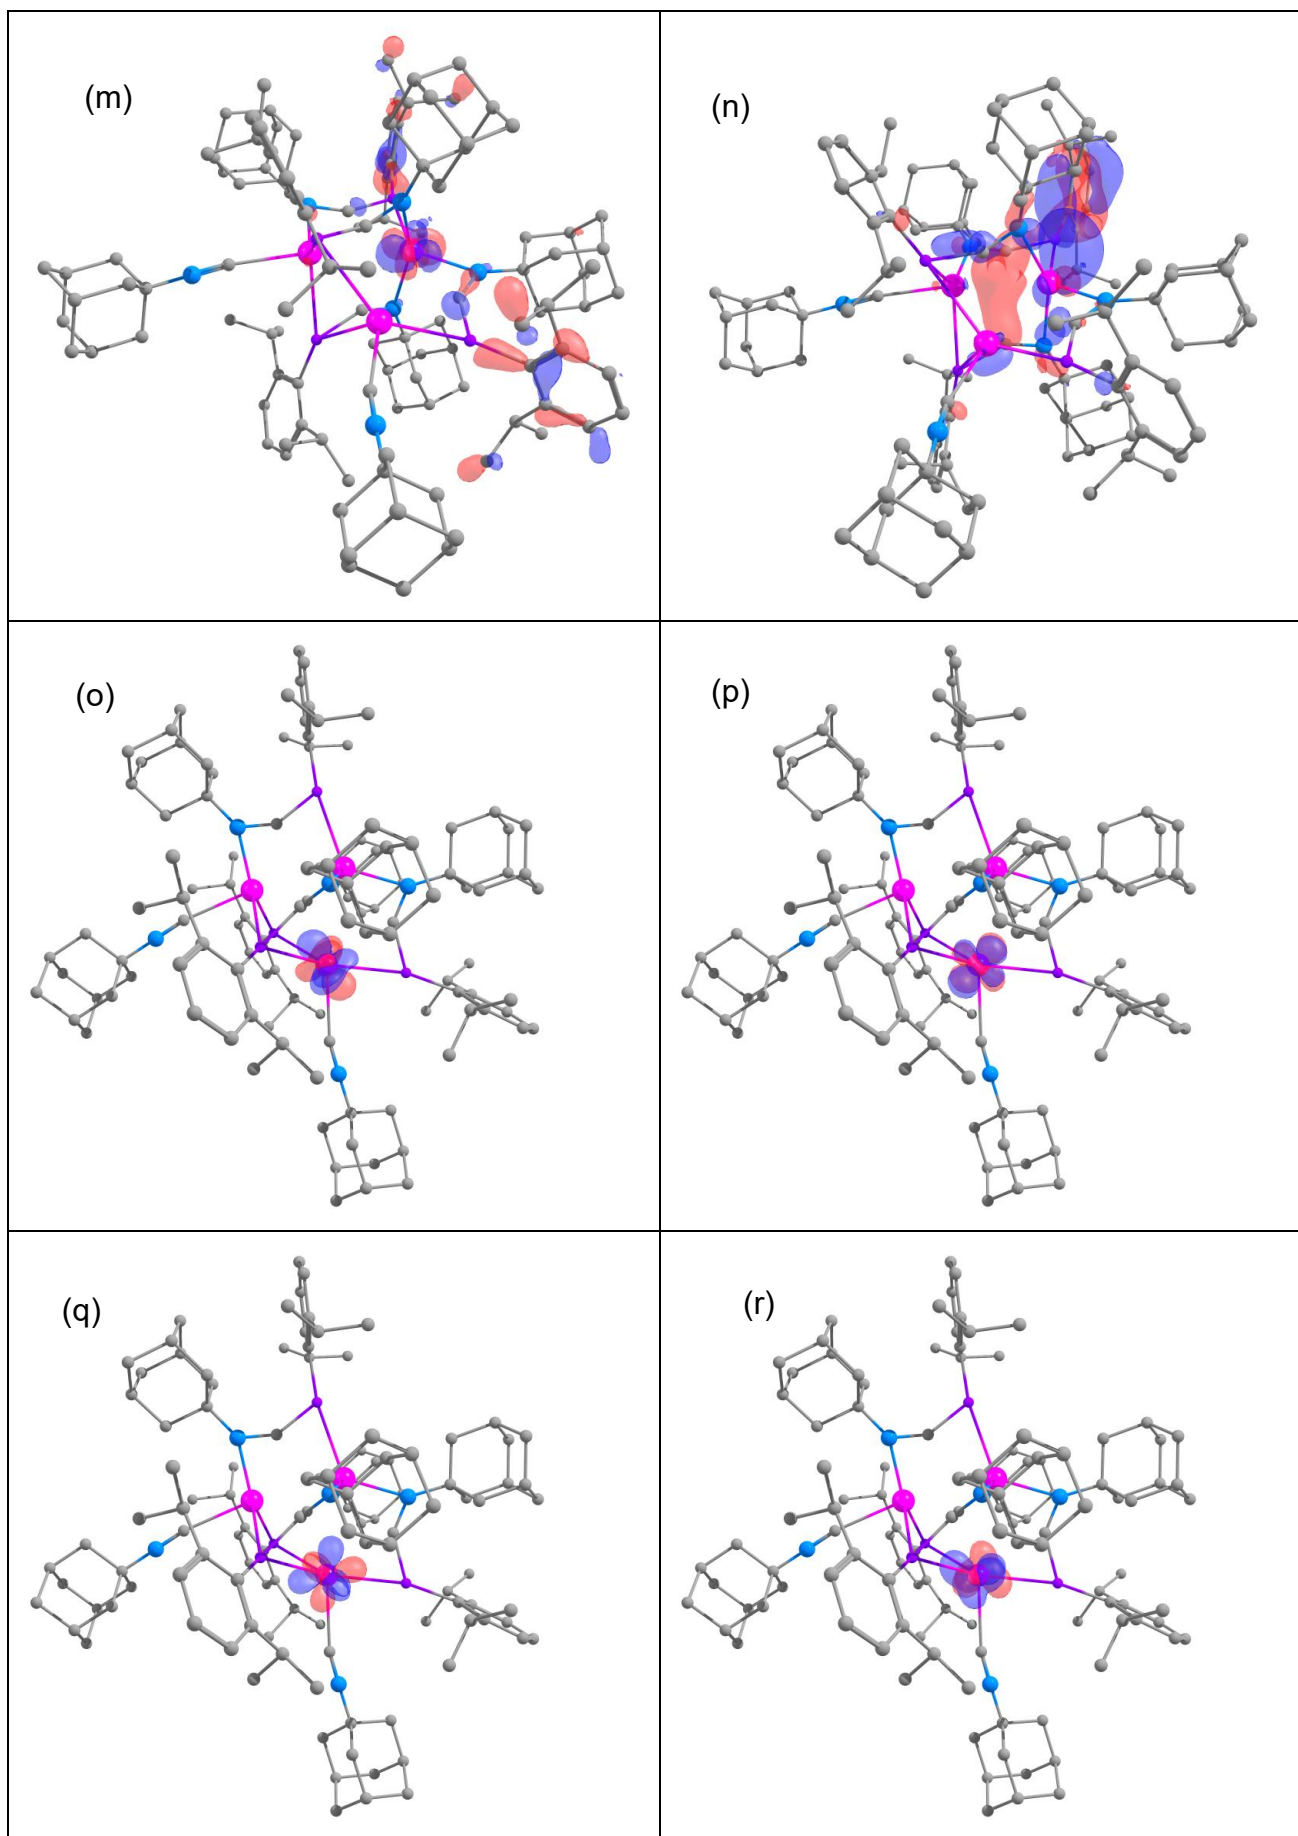

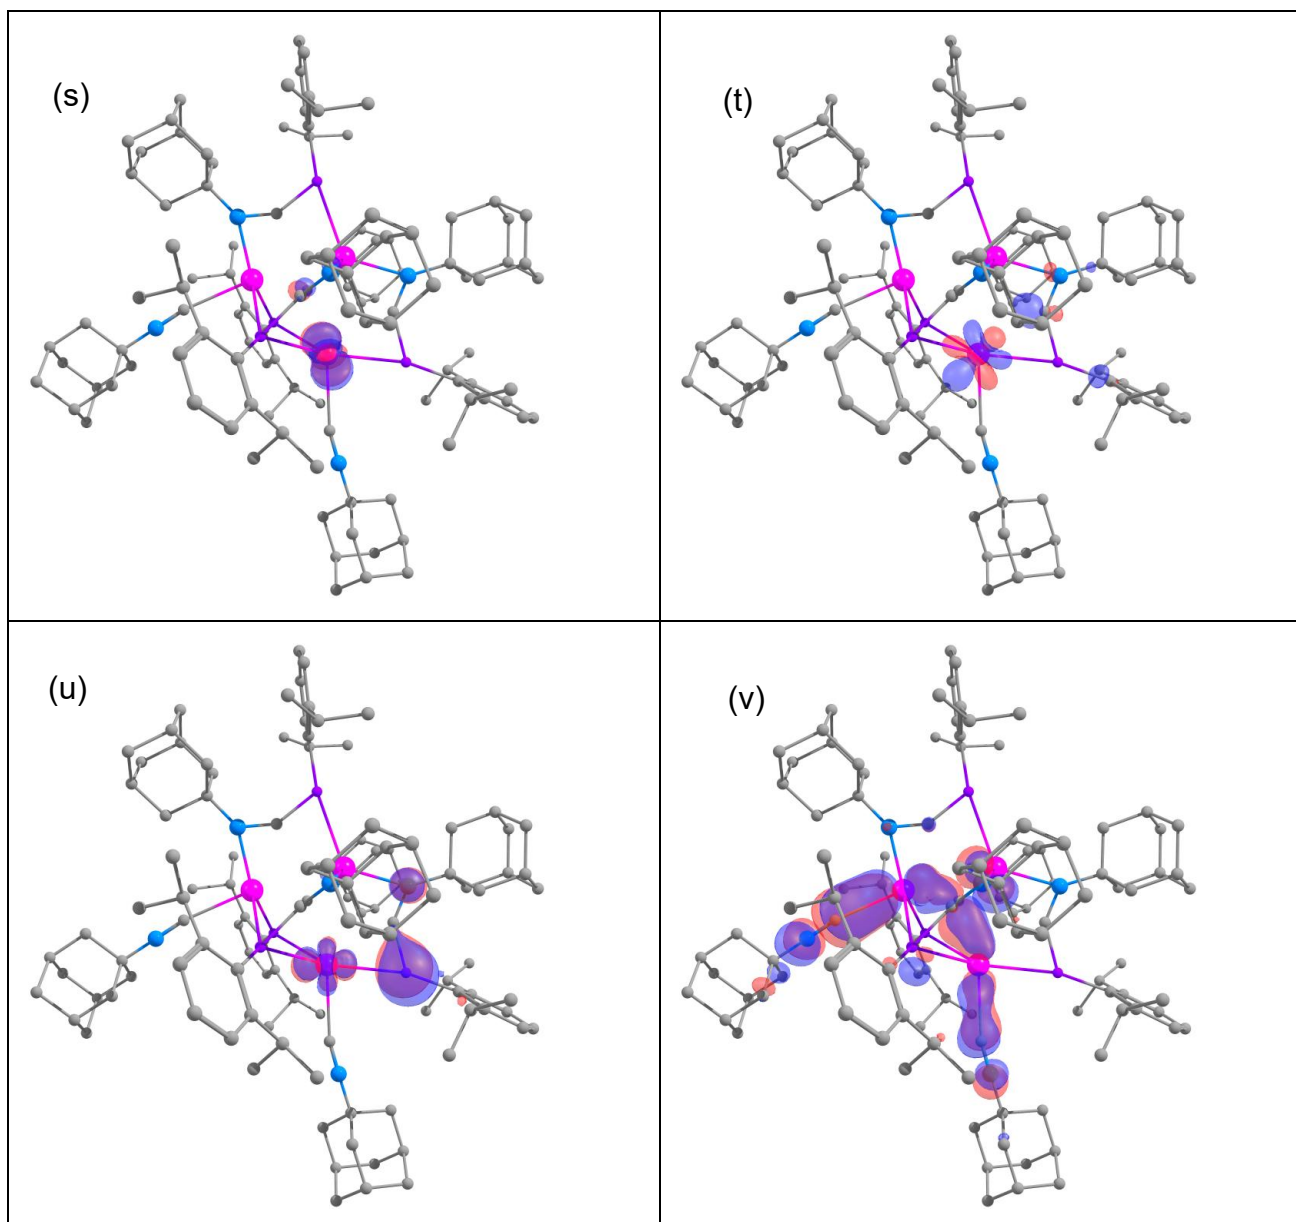

**Fig. S56** Computed MOs (AMOs) for complex **7**,  $S=1$ . (a)HOMO-139 (b)HOMO-135 (c)HOMO-134 (d)HOMO-133 (e)HOMO-127 (f)HOMO-125 (g)HOMO-120 (h)HOMO-119 (i)HOMO-118 (j)HOMO-113 (k)HOMO-112 (l)HOMO-109 (m)HOMO-105 (n)HOMO-16 (o)HOMO-6 (p)HOMO-5 (q)HOMO-4 (r)HOMO-3 (s)HOMO-2 (t)HOMO-1 (u)HOMO (v)LUMO.

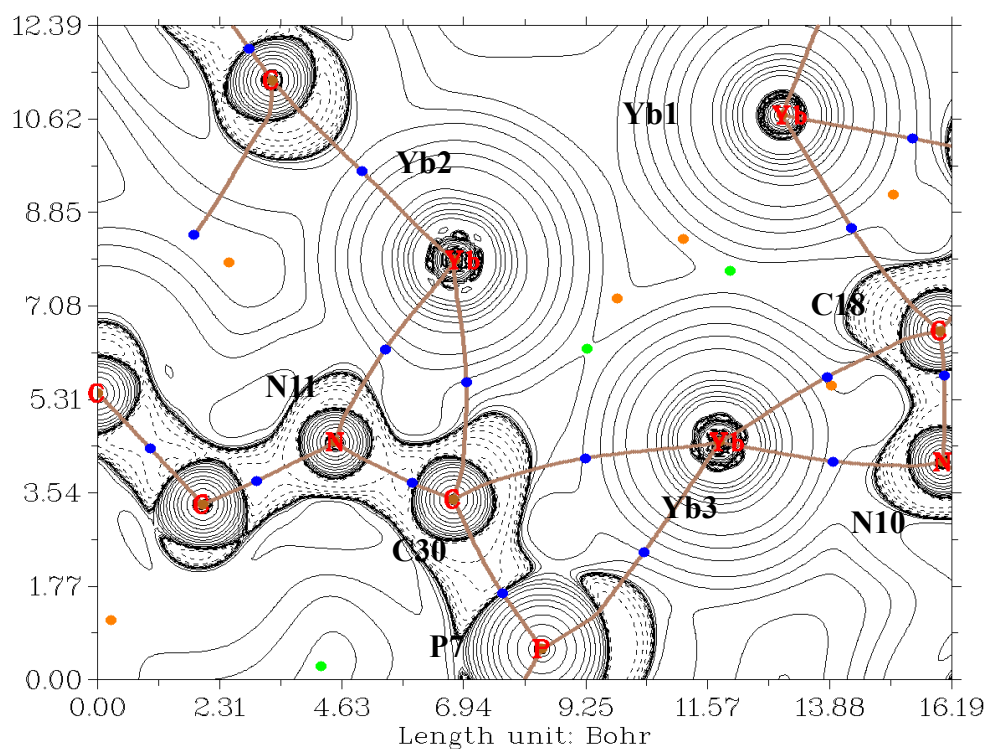

**Fig. S57** Computed Laplacian distribution for complex **7** ( $S=1$ ).

**Table S23** Computed BCP descriptors for complex **7**,  $S=1$ .

| Atom labels | $\rho(r)$ | $\nabla^2\rho(r)$ | $G(r)$ | $V(r)$ | $H(r)$ | $\epsilon$ |
|-------------|-----------|-------------------|--------|--------|--------|------------|
| Yb3-P7      | 0.04      | 0.08              | 0.03   | -0.03  | -0.006 | 0.09       |
| Yb3-N8      | 0.06      | 0.22              | 0.06   | -0.07  | -0.005 | 0.06       |
| Yb3-N9      | 0.06      | 0.23              | 0.06   | -0.07  | -0.005 | 0.06       |
| Yb3-N10     | 0.07      | 0.27              | 0.08   | -0.09  | -0.01  | 0.01       |
| Yb3-C13     | 0.04      | 0.15              | 0.04   | -0.04  | -0.002 | 3.65       |
| Yb3-C18     | 0.05      | 0.16              | 0.04   | -0.05  | -0.004 | 3.36       |
| Yb3-C30     | 0.03      | 0.09              | 0.02   | -0.03  | -0.002 | 0.68       |
| Yb2-P4      | 0.04      | 0.09              | 0.03   | -0.03  | -0.005 | 0.57       |
| Yb2-P5      | 0.03      | 0.09              | 0.03   | -0.03  | -0.006 | 0.34       |
| Yb2-N11     | 0.08      | 0.30              | 0.09   | -0.11  | -0.02  | 0.06       |
| Yb2-C13     | 0.04      | 0.12              | 0.04   | -0.04  | -0.005 | 0.34       |
| Yb2-C16     | 0.05      | 0.13              | 0.04   | -0.04  | -0.006 | 0.22       |
| Yb2-C30     | 0.06      | 0.17              | 0.05   | -0.06  | -0.009 | 0.98       |
| Yb2-C41     | 0.04      | 0.13              | 0.03   | -0.04  | -0.002 | 0.07       |
| Yb1-P4      | 0.02      | 0.05              | 0.02   | -0.02  | -0.002 | 0.39       |
| Yb1-P5      | 0.04      | 0.10              | 0.03   | -0.04  | -0.005 | 0.17       |
| Yb1-C13     | 0.02      | 0.07              | 0.02   | -0.02  | 0.0003 | 1.02       |
| Yb1-C16     | 0.02      | 0.07              | 0.02   | -0.02  | 0.0004 | 1.40       |
| Yb1-C18     | 0.03      | 0.10              | 0.03   | -0.03  | -0.002 | 0.47       |

|          |      |      |      |       |         |      |
|----------|------|------|------|-------|---------|------|
| Yb1-C114 | 0.03 | 0.11 | 0.03 | -0.03 | -0.0001 | 0.04 |
|----------|------|------|------|-------|---------|------|

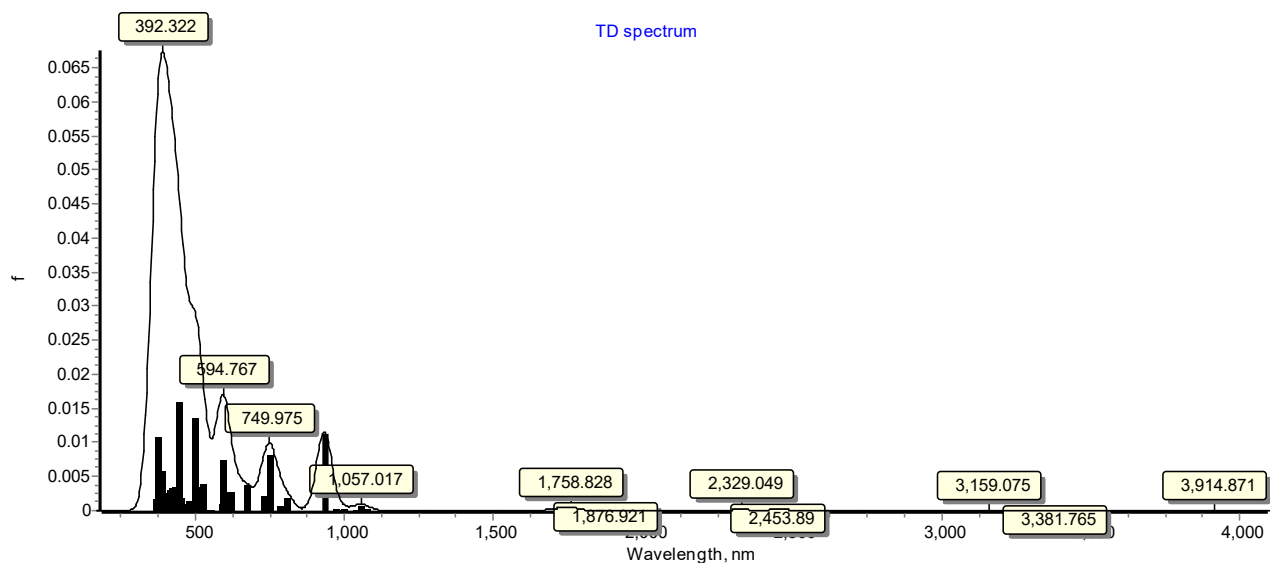

**Fig. S58** Computed TDDFT spectrum for complex **7**, nstates=200 (no solvent).

**Table S23** AMO-HOMO=516, BMO-HOMO=514.

|                                                                                                                                                                                                                                                                                                                                                                     |                                                |                                                |
|---------------------------------------------------------------------------------------------------------------------------------------------------------------------------------------------------------------------------------------------------------------------------------------------------------------------------------------------------------------------|------------------------------------------------|------------------------------------------------|
| <p>Excited State 20: 3.009-A<br/>0.9648 eV 1285.08 nm<br/>f=0.0000 &lt;S**2&gt;=2.014</p> <p>394B -&gt; 515B -0.10861<br/>402B -&gt; 515B 0.12276<br/>425B -&gt; 515B 0.10772<br/><b>506B -&gt; 515B 0.84821</b><br/>507B -&gt; 515B -0.41709</p>                                                                                                                   | <p style="text-align: center;"><b>506B</b></p> | <p style="text-align: center;"><b>515B</b></p> |
| <p>Excited State 21: 3.012-A<br/>1.1568 eV 1071.74 nm<br/>f=0.0003 &lt;S**2&gt;=2.019</p> <p>402B -&gt; 515B 0.10915<br/>419B -&gt; 515B -0.10124<br/>423B -&gt; 515B 0.10203<br/>503B -&gt; 515B -0.13471<br/>504B -&gt; 515B -0.36771<br/>505B -&gt; 515B 0.51420<br/>506B -&gt; 515B 0.33361<br/><b>507B -&gt; 515B 0.60192</b><br/>514B -&gt; 515B -0.12745</p> | <p style="text-align: center;"><b>507B</b></p> | <p style="text-align: center;"><b>515B</b></p> |
| <p>Excited State 22: 3.008-A<br/>1.1770 eV 1053.35 nm<br/>f=0.0006 &lt;S**2&gt;=2.012</p>                                                                                                                                                                                                                                                                           | <p style="text-align: center;"><b>513B</b></p> | <p style="text-align: center;"><b>516B</b></p> |

|                                                                                                                                                                                                                                                                                                                        |                                                                                                                             |                                                                                                                              |
|------------------------------------------------------------------------------------------------------------------------------------------------------------------------------------------------------------------------------------------------------------------------------------------------------------------------|-----------------------------------------------------------------------------------------------------------------------------|------------------------------------------------------------------------------------------------------------------------------|
| <p><b>513B -&gt; 516B</b>      <b>0.90510</b><br/> 514B -&gt; 516B      0.37040</p>                                                                                                                                                                                                                                    | 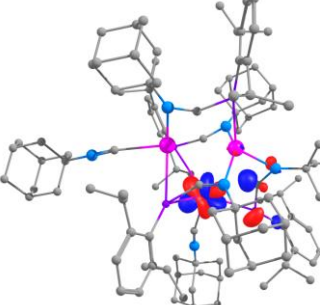                                           |                                            |
| <p>Excited State 24: 3.008-A<br/> 1.2434 eV 997.14 nm<br/> f=0.0002 &lt;S**2&gt;=2.013<br/> 510B -&gt; 516B      -0.23888<br/> <b>512B -&gt; 516B</b>      <b>0.96325</b></p>                                                                                                                                          | <p style="text-align: center;">512B</p>    | <p style="text-align: center;">516B</p>    |
| <p>Excited State 30: 3.006-A<br/> 1.3296 eV 932.53 nm<br/> f=0.0113 &lt;S**2&gt;=2.009<br/> 419B -&gt; 515B      -0.14179<br/> 423B -&gt; 515B      0.25369<br/> 424B -&gt; 515B      0.10623<br/> 501B -&gt; 515B      0.21296<br/> <b>503B -&gt; 515B</b>      <b>0.84473</b><br/> 504B -&gt; 515B      -0.27248</p> | <p style="text-align: center;">503B</p>   | <p style="text-align: center;">515B</p>   |
| <p>Excited State 32: 3.010-A<br/> 1.5395 eV 805.34 nm<br/> f=0.0019 &lt;S**2&gt;=2.015<br/> 442B -&gt; 516B      -0.14055<br/> 502B -&gt; 515B      0.14299<br/> 505B -&gt; 516B      0.16946<br/> <b>506B -&gt; 516B</b>      <b>0.85236</b><br/> 507B -&gt; 516B      -0.39546</p>                                   | <p style="text-align: center;">506B</p>  | <p style="text-align: center;">516B</p>  |
| <p>Excited State 35: 3.006-A<br/> 1.6512 eV 750.87 nm<br/> f=0.0081 &lt;S**2&gt;=2.010<br/> 437B -&gt; 516B      0.12404<br/> 438B -&gt; 516B      0.10186<br/> 439B -&gt; 516B      0.12905<br/> 442B -&gt; 516B      0.13046<br/> 503B -&gt; 516B      0.10514</p>                                                   | <p style="text-align: center;">505B</p>                                                                                     | <p style="text-align: center;">516B</p>                                                                                      |

|                                                                                                                                                                                                                                                                          |          |          |
|--------------------------------------------------------------------------------------------------------------------------------------------------------------------------------------------------------------------------------------------------------------------------|----------|----------|
| 504B -> 516B      0.46618<br><b>505B -&gt; 516B</b> <b>0.78675</b><br>506B -> 516B      -0.10118                                                                                                                                                                         |          |          |
| Excited State 36: 3.016-A<br>1.7012 eV 728.82 nm<br>f=0.0020 <S**2>=2.024<br>499B -> 515B      -0.13068<br><b>501B -&gt; 515B</b> <b>0.91273</b><br>502B -> 515B      0.12444<br>503B -> 515B      -0.18540<br>504B -> 515B      0.12737<br>505B -> 515B      0.12310    | 501B<br> | 515B<br> |
| Excited State 37: 3.012-A<br>1.8564 eV 667.86 nm<br>f=0.0036 <S**2>=2.017<br>437B -> 516B      -0.14600<br>438B -> 516B      -0.13001<br>439B -> 516B      -0.14897<br><b>504B -&gt; 516B</b> <b>0.84444</b><br>505B -> 516B      -0.39638<br>507B -> 516B      -0.12162 | 504B<br> | 516B<br> |
| Excited State 41: 3.143-A<br>2.0129 eV 615.94 nm<br>f=0.0028 <S**2>=2.219<br>511A -> 517A      0.13951<br>498B -> 515B      0.23337<br><b>500B -&gt; 515B</b> <b>0.88802</b><br>501B -> 515B      0.10751<br>509B -> 517B      -0.13087<br>513B -> 517B      0.13499     | 500B<br> | 515B<br> |
| Excited State 47: 3.030-A<br>2.0697 eV 599.05 nm<br>f=0.0027 <S**2>=2.046<br>509A -> 517A      0.15495<br>514A -> 517A      -0.15096<br><b>516A -&gt; 517A</b> <b>0.48047</b>                                                                                            | 514B     | 517B     |

|                                                                                                                                                                                                                                                                                                                                                          |                                                                                                                             |                                                                                                                              |
|----------------------------------------------------------------------------------------------------------------------------------------------------------------------------------------------------------------------------------------------------------------------------------------------------------------------------------------------------------|-----------------------------------------------------------------------------------------------------------------------------|------------------------------------------------------------------------------------------------------------------------------|
| <p>516A -&gt; 519A      -0.22309<br/> 507B -&gt; 517B      0.20373<br/> 507B -&gt; 519B      -0.10985<br/> 511B -&gt; 517B      -0.20691<br/> 512B -&gt; 517B      -0.10672<br/> 513B -&gt; 517B      -0.19616<br/> <b>514B -&gt; 517B      0.59371</b><br/> 514B -&gt; 519B      -0.27778</p>                                                           | 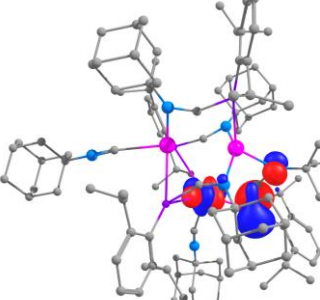 <p style="text-align: center;">516A</p>   |  <p style="text-align: center;">517A</p>   |
| <p>Excited State 49: 3.013-A<br/> 2.0886 eV 593.61 nm<br/> f=0.0026 &lt;S**2&gt;=2.019<br/> 442B -&gt; 516B      -0.11275<br/> 501B -&gt; 516B      0.22188<br/> <b>503B -&gt; 516B      0.92647</b></p>                                                                                                                                                 |  <p style="text-align: center;">503B</p>  |  <p style="text-align: center;">516B</p>  |
| <p>Excited State 51: 3.008-A<br/> 2.1025 eV 589.69 nm<br/> f=0.0073 &lt;S**2&gt;=2.012<br/> <b>514A -&gt; 517A      0.54355</b><br/> 514A -&gt; 519A      -0.24517<br/> 516A -&gt; 517A      0.21213<br/> <b>511B -&gt; 517B      0.57164</b><br/> 511B -&gt; 519B      -0.26598<br/> 512B -&gt; 517B      0.21259<br/> 514B -&gt; 517B      0.18990</p> |  <p style="text-align: center;">511B</p> |  <p style="text-align: center;">517B</p> |

|                                                                                                                                                                                                                                                                                                                                                                                                                                                                                                                                                     |                                                                                                                                                                                              |                                                                                                  |
|-----------------------------------------------------------------------------------------------------------------------------------------------------------------------------------------------------------------------------------------------------------------------------------------------------------------------------------------------------------------------------------------------------------------------------------------------------------------------------------------------------------------------------------------------------|----------------------------------------------------------------------------------------------------------------------------------------------------------------------------------------------|--------------------------------------------------------------------------------------------------|
|                                                                                                                                                                                                                                                                                                                                                                                                                                                                                                                                                     | 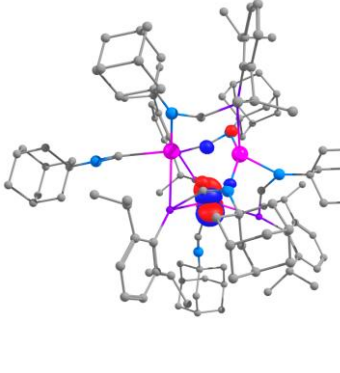                                                                                                            |                |
| <p>Excited State 60: 3.692-A<br/>2.3627 eV 524.75 nm<br/>f=0.0015 <math>\langle S^{*2} \rangle = 3.158</math></p> <p><b>510A -&gt; 518A 0.42963</b><br/>510A -&gt; 520A 0.17139<br/>510A -&gt; 521A -0.19966<br/><b>512A -&gt; 518A 0.42225</b><br/>512A -&gt; 520A 0.18508<br/>512A -&gt; 521A -0.19189<br/>514A -&gt; 518A -0.13542<br/>515A -&gt; 518A -0.39194<br/>515A -&gt; 520A -0.14280<br/>515A -&gt; 521A 0.15516<br/>508B -&gt; 518B -0.16372<br/>510B -&gt; 518B -0.16486<br/>513B -&gt; 518B -0.21857<br/>514B -&gt; 518B -0.19399</p> | <p>510A</p>  <p>512A</p>  | <p>518A</p>   |
| <p>Excited State 63: 3.436-A<br/>2.3750 eV 522.04 nm<br/>f=0.0039 <math>\langle S^{*2} \rangle = 2.702</math></p> <p>510A -&gt; 518A 0.14040<br/>511A -&gt; 518A 0.12424<br/>512A -&gt; 518A 0.20687<br/>512A -&gt; 521A -0.10317<br/>513A -&gt; 518A -0.14091<br/>515A -&gt; 518A 0.31721<br/>515A -&gt; 520A 0.10321<br/>516A -&gt; 518A -0.10428<br/>508B -&gt; 518B -0.33417<br/>508B -&gt; 520B -0.13244<br/>508B -&gt; 521B 0.15956<br/><b>513B -&gt; 518B 0.59196</b></p>                                                                    | <p>513B</p>                                                                                               | <p>518B</p>  |

|                        |                |                                                                                     |                                                                                      |
|------------------------|----------------|-------------------------------------------------------------------------------------|--------------------------------------------------------------------------------------|
| 513B -> 520B           | 0.22637        |                                                                                     |                                                                                      |
| 513B -> 521B           | -0.24765       |                                                                                     |                                                                                      |
| Excited State 64:      | 3.056-A        |                                                                                     |                                                                                      |
|                        | 2.4049 eV      | 515.54 nm                                                                           |                                                                                      |
|                        | f=0.0014       | <S**2>=2.085                                                                        |                                                                                      |
| 510A -> 518A           | 0.17304        |                                                                                     |                                                                                      |
| 512A -> 518A           | -0.12809       |                                                                                     |                                                                                      |
| 513A -> 518A           | 0.43500        |                                                                                     |                                                                                      |
| 513A -> 520A           | 0.19216        |                                                                                     |                                                                                      |
| 513A -> 521A           | -0.19693       |                                                                                     |                                                                                      |
| 510B -> 518B           | -0.12849       |                                                                                     |                                                                                      |
| 511B -> 518B           | -0.20204       |                                                                                     |                                                                                      |
| <b>512B -&gt; 518B</b> | <b>0.60704</b> |                                                                                     |                                                                                      |
| 512B -> 520B           | 0.25563        |                                                                                     |                                                                                      |
| 512B -> 521B           | -0.28588       |                                                                                     |                                                                                      |
|                        |                | 512B                                                                                | 518B                                                                                 |
|                        |                | 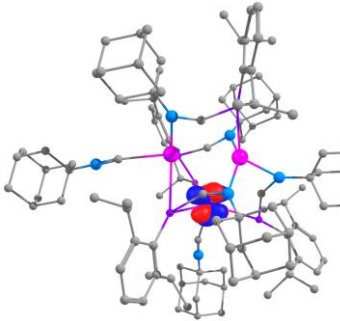   |    |
| Excited State 69:      | 3.030-A        |                                                                                     |                                                                                      |
|                        | 2.4494 eV      | 506.19 nm                                                                           |                                                                                      |
|                        | f=0.0035       | <S**2>=2.046                                                                        |                                                                                      |
| 510A -> 518A           | 0.46483        |                                                                                     |                                                                                      |
| 510A -> 520A           | 0.17396        |                                                                                     |                                                                                      |
| 510A -> 521A           | -0.19350       |                                                                                     |                                                                                      |
| 515A -> 518A           | 0.16019        |                                                                                     |                                                                                      |
| 501B -> 516B           | -0.21636       |                                                                                     |                                                                                      |
| <b>508B -&gt; 518B</b> | <b>0.61111</b> |                                                                                     |                                                                                      |
| 508B -> 520B           | 0.23591        |                                                                                     |                                                                                      |
| 508B -> 521B           | -0.27633       |                                                                                     |                                                                                      |
| 513B -> 518B           | 0.13681        |                                                                                     |                                                                                      |
|                        |                | 508B                                                                                | 518B                                                                                 |
|                        |                |   |   |
| Excited State 70:      | 3.017-A        |                                                                                     |                                                                                      |
|                        | 2.4835 eV      | 499.23 nm                                                                           |                                                                                      |
|                        | f=0.0136       | <S**2>=2.025                                                                        |                                                                                      |
| 498B -> 516B           | 0.21114        |                                                                                     |                                                                                      |
| <b>500B -&gt; 516B</b> | <b>0.93247</b> |                                                                                     |                                                                                      |
|                        |                | 500B                                                                                | 516B                                                                                 |
|                        |                |  |  |
| Excited State 101:     | 3.075-A        |                                                                                     |                                                                                      |
|                        | 2.7729 eV      | 447.13 nm                                                                           |                                                                                      |
|                        | f=0.0159       | <S**2>=2.113                                                                        |                                                                                      |
| <b>509A -&gt; 517A</b> | <b>0.36562</b> |                                                                                     |                                                                                      |
| 510A -> 518A           | 0.10944        |                                                                                     |                                                                                      |
| 514A -> 519A           | 0.13777        |                                                                                     |                                                                                      |
|                        |                | 507B                                                                                | 517B                                                                                 |
|                        |                |  |  |

|                                                                            |                |                                                                                                                                                                                             |                                                                                                                                                                                               |
|----------------------------------------------------------------------------|----------------|---------------------------------------------------------------------------------------------------------------------------------------------------------------------------------------------|-----------------------------------------------------------------------------------------------------------------------------------------------------------------------------------------------|
| 515A -> 520A                                                               | 0.24360        | 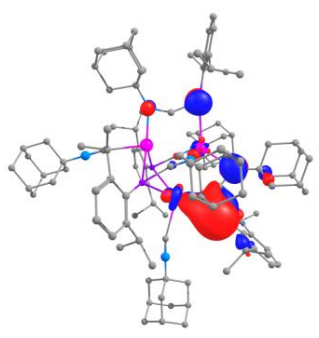 <p>509A</p>  <p>498B</p> |  <p>517A</p>  <p>516B</p> |
| 515A -> 523A                                                               | -0.13174       |                                                                                                                                                                                             |                                                                                                                                                                                               |
| 515A -> 530A                                                               | -0.10526       |                                                                                                                                                                                             |                                                                                                                                                                                               |
| 516A -> 519A                                                               | 0.15143        |                                                                                                                                                                                             |                                                                                                                                                                                               |
| 505B -> 517B                                                               | 0.11966        |                                                                                                                                                                                             |                                                                                                                                                                                               |
| <b>507B -&gt; 517B</b>                                                     | <b>0.39579</b> |                                                                                                                                                                                             |                                                                                                                                                                                               |
| 510B -> 518B                                                               | -0.13559       |                                                                                                                                                                                             |                                                                                                                                                                                               |
| 510B -> 520B                                                               | 0.15143        |                                                                                                                                                                                             |                                                                                                                                                                                               |
| 510B -> 521B                                                               | -0.12507       |                                                                                                                                                                                             |                                                                                                                                                                                               |
| 510B -> 523B                                                               | -0.12635       |                                                                                                                                                                                             |                                                                                                                                                                                               |
| 511B -> 519B                                                               | 0.15053        |                                                                                                                                                                                             |                                                                                                                                                                                               |
| 512B -> 518B                                                               | 0.10373        |                                                                                                                                                                                             |                                                                                                                                                                                               |
| 512B -> 520B                                                               | -0.12125       |                                                                                                                                                                                             |                                                                                                                                                                                               |
| 512B -> 521B                                                               | 0.10546        |                                                                                                                                                                                             |                                                                                                                                                                                               |
| 513B -> 518B                                                               | -0.10335       |                                                                                                                                                                                             |                                                                                                                                                                                               |
| 513B -> 520B                                                               | 0.27194        |                                                                                                                                                                                             |                                                                                                                                                                                               |
| 513B -> 521B                                                               | -0.12143       |                                                                                                                                                                                             |                                                                                                                                                                                               |
| 513B -> 523B                                                               | -0.13035       |                                                                                                                                                                                             |                                                                                                                                                                                               |
| 513B -> 530B                                                               | -0.11607       |                                                                                                                                                                                             |                                                                                                                                                                                               |
| 514B -> 519B                                                               | 0.15480        |                                                                                                                                                                                             |                                                                                                                                                                                               |
| Excited State 110: 3.034-A<br>2.8831 eV 430.04 nm<br>f=0.0034 <S**2>=2.051 |                |                                                                                                                                                                                             |                                                                                                                                                                                               |
| 490B -> 516B                                                               | 0.13048        |                                                                                                                                                                                             |                                                                                                                                                                                               |
| 491B -> 516B                                                               | -0.12210       |                                                                                                                                                                                             |                                                                                                                                                                                               |
| <b>498B -&gt; 516B</b>                                                     | <b>0.67391</b> |                                                                                                                                                                                             |                                                                                                                                                                                               |
| 499B -> 516B                                                               | -0.65771       |                                                                                                                                                                                             |                                                                                                                                                                                               |
| 500B -> 516B                                                               | -0.16902       |                                                                                                                                                                                             |                                                                                                                                                                                               |

### optimized geometries

#### complex 3 (dispersion)

|    |              |              |              |
|----|--------------|--------------|--------------|
| Yb | -2.544716000 | -0.904193000 | -0.346558000 |
| Yb | 2.429076000  | 0.947221000  | -0.484699000 |
| Yb | 0.435778000  | -2.565389000 | -0.243622000 |
| Yb | -0.440800000 | 2.721673000  | -0.195972000 |
| P  | -0.028332000 | 0.072886000  | 0.825025000  |
| P  | 3.079450000  | -1.817602000 | -1.088957000 |
| P  | -3.117919000 | 1.899075000  | -0.779697000 |
| P  | -1.702722000 | -2.858194000 | 1.582706000  |

|    |              |              |              |
|----|--------------|--------------|--------------|
| P  | 1.820025000  | 2.981135000  | 1.523377000  |
| Si | -2.230640000 | -1.809377000 | -3.616785000 |
| Si | 1.638072000  | 2.927526000  | -3.292536000 |
| O  | -4.851738000 | -1.391037000 | 0.276589000  |
| O  | 4.836468000  | 1.202664000  | -0.174180000 |
| O  | 1.104353000  | -4.869987000 | -0.167701000 |
| O  | -1.303105000 | 4.930939000  | 0.261456000  |
| C  | -0.785389000 | 0.569159000  | 3.552167000  |
| C  | 0.139891000  | -0.065277000 | 2.681208000  |
| C  | 1.179513000  | -0.821760000 | 3.287543000  |
| C  | 5.373627000  | -3.370691000 | -1.895678000 |
| C  | -1.901220000 | 1.440912000  | 3.024985000  |
| H  | -1.691922000 | 1.573254000  | 1.955878000  |
| C  | 4.123798000  | -2.795438000 | -2.250029000 |
| C  | 1.241764000  | -0.967319000 | 4.675696000  |
| H  | 2.043062000  | -1.561647000 | 5.108808000  |
| C  | 3.293506000  | 3.785396000  | 2.277713000  |
| C  | 3.798215000  | 3.414675000  | 3.555927000  |
| C  | -0.704170000 | 0.388497000  | 4.934187000  |
| H  | -1.443143000 | 0.864914000  | 5.573743000  |
| C  | 2.244730000  | -1.524646000 | 2.477151000  |
| C  | 0.706145000  | 1.714851000  | -2.250303000 |
| H  | 0.982259000  | 0.684348000  | -2.540619000 |
| C  | -2.623211000 | -4.361022000 | 2.111204000  |
| C  | 6.077189000  | -4.107742000 | -2.851851000 |
| H  | 7.030867000  | -4.550795000 | -2.583050000 |
| C  | 0.299288000  | -0.380861000 | 5.509894000  |
| H  | 0.350212000  | -0.513239000 | 6.586745000  |
| C  | -2.617162000 | -4.833516000 | 3.450777000  |
| C  | -4.555431000 | 2.836035000  | -1.461324000 |
| C  | -1.926699000 | 2.819648000  | 3.680751000  |
| H  | -2.154745000 | 2.763342000  | 4.750354000  |
| H  | -2.691051000 | 3.447704000  | 3.214336000  |
| H  | -0.954955000 | 3.310091000  | 3.570684000  |
| C  | 3.620443000  | -2.997720000 | -3.561594000 |
| C  | 5.587278000  | -4.291875000 | -4.139370000 |
| H  | 6.155305000  | -4.866308000 | -4.865458000 |
| C  | 3.052078000  | 2.443478000  | 4.453514000  |
| H  | 2.647726000  | 1.646560000  | 3.820342000  |
| C  | -1.074040000 | -2.074877000 | -2.175249000 |
| C  | 4.010771000  | 4.730244000  | 1.501729000  |
| C  | 5.924444000  | -3.270971000 | -0.485052000 |
| H  | 5.660895000  | -2.278563000 | -0.099876000 |

|   |              |              |              |
|---|--------------|--------------|--------------|
| C | 2.149880000  | -3.044302000 | 2.619942000  |
| H | 2.411026000  | -3.363779000 | 3.634754000  |
| H | 2.828032000  | -3.546393000 | 1.922558000  |
| H | 1.122221000  | -3.383229000 | 2.435253000  |
| C | 4.997747000  | 3.978840000  | 3.997155000  |
| H | 5.391630000  | 3.689957000  | 4.966325000  |
| C | -4.579058000 | 3.057017000  | -2.863205000 |
| C | -6.315428000 | -1.138081000 | 2.069500000  |
| H | -6.962441000 | -1.638903000 | 2.793790000  |
| H | -5.825259000 | -0.295120000 | 2.565785000  |
| C | -3.372442000 | -5.961431000 | 3.779118000  |
| H | -3.376672000 | -6.319145000 | 4.804459000  |
| C | -5.659211000 | 3.156950000  | 0.837614000  |
| H | -5.232901000 | 2.170539000  | 1.057817000  |
| C | -5.622983000 | 3.336815000  | -0.668787000 |
| C | 1.753053000  | -5.462692000 | -1.317682000 |
| H | 2.584447000  | -4.816831000 | -1.611908000 |
| H | 1.022053000  | -5.504225000 | -2.135438000 |
| C | -5.963355000 | -0.627181000 | -0.253489000 |
| H | -6.279229000 | -1.076510000 | -1.199478000 |
| H | -5.594471000 | 0.382784000  | -0.455038000 |
| C | -3.246912000 | 0.723509000  | 3.124356000  |
| H | -3.204276000 | -0.235141000 | 2.594042000  |
| H | -4.051877000 | 1.329838000  | 2.694777000  |
| H | -3.502362000 | 0.506829000  | 4.167594000  |
| C | 5.198038000  | 5.276661000  | 1.990109000  |
| H | 5.740385000  | 6.001428000  | 1.389822000  |
| C | 5.247039000  | -4.320168000 | 0.408477000  |
| H | 4.158218000  | -4.259073000 | 0.328335000  |
| H | 5.522491000  | -4.189316000 | 1.460894000  |
| H | 5.552618000  | -5.325474000 | 0.097154000  |
| C | 2.294326000  | -2.390169000 | -3.965444000 |
| H | 1.676609000  | -2.350384000 | -3.057244000 |
| C | -5.272892000 | -2.066106000 | 1.479391000  |
| H | -4.380565000 | -2.229285000 | 2.085260000  |
| H | -5.697306000 | -3.043481000 | 1.219370000  |
| C | 4.359686000  | -3.738758000 | -4.483105000 |
| H | 3.967106000  | -3.887214000 | -5.484505000 |
| C | -4.779878000 | 4.214535000  | 1.516190000  |
| H | -3.752991000 | 4.171989000  | 1.142958000  |
| H | -4.759869000 | 4.074608000  | 2.602272000  |
| H | -5.178870000 | 5.214260000  | 1.310586000  |
| C | -3.371856000 | -5.069768000 | 1.133821000  |

|   |              |              |              |
|---|--------------|--------------|--------------|
| C | 5.702187000  | 4.900790000  | 3.229782000  |
| H | 6.632068000  | 5.324992000  | 3.597994000  |
| C | -1.832821000 | -4.111114000 | 4.531671000  |
| H | -0.938928000 | -3.691475000 | 4.055785000  |
| C | -4.103937000 | -6.198315000 | 1.506293000  |
| H | -4.673423000 | -6.739110000 | 0.755515000  |
| C | 3.472379000  | 5.175284000  | 0.156262000  |
| H | 2.873610000  | 4.342451000  | -0.240685000 |
| C | 1.859270000  | 3.144592000  | 5.115865000  |
| H | 1.231688000  | 2.421460000  | 5.644957000  |
| H | 1.240022000  | 3.647052000  | 4.367786000  |
| H | 2.211987000  | 3.900265000  | 5.827234000  |
| C | -3.439819000 | 2.571449000  | -3.742080000 |
| H | -3.044017000 | 1.648996000  | -3.295630000 |
| C | 3.649789000  | -1.013054000 | 2.789085000  |
| H | 3.711698000  | 0.065547000  | 2.616698000  |
| H | 4.392302000  | -1.510051000 | 2.155022000  |
| H | 3.923042000  | -1.195046000 | 3.833567000  |
| C | 7.445029000  | -3.396492000 | -0.385835000 |
| H | 7.787558000  | -4.416390000 | -0.590745000 |
| H | 7.774662000  | -3.145961000 | 0.627749000  |
| H | 7.952317000  | -2.727112000 | -1.087731000 |
| C | -2.647403000 | -2.940143000 | 5.098873000  |
| H | -2.991231000 | -2.273804000 | 4.303352000  |
| H | -2.044255000 | -2.342677000 | 5.789998000  |
| H | -3.527675000 | -3.316611000 | 5.632503000  |
| C | -4.116015000 | -6.644651000 | 2.822652000  |
| H | -4.694523000 | -7.521286000 | 3.100515000  |
| C | -3.958215000 | -1.236900000 | -3.031903000 |
| H | -4.418169000 | -1.987473000 | -2.376940000 |
| H | -4.622048000 | -1.116166000 | -3.894448000 |
| H | -3.960471000 | -0.267594000 | -2.513111000 |
| C | 2.166491000  | -6.854532000 | -0.864351000 |
| H | 2.224078000  | -7.559666000 | -1.696839000 |
| H | 3.147476000  | -6.816335000 | -0.379107000 |
| C | -7.060282000 | -0.671922000 | 0.815345000  |
| H | -7.831482000 | -1.399327000 | 0.542134000  |
| H | -7.544286000 | 0.297980000  | 0.942710000  |
| C | 5.538578000  | 1.712358000  | 0.972599000  |
| H | 4.832681000  | 1.761689000  | 1.799763000  |
| H | 5.889836000  | 2.730786000  | 0.768709000  |
| C | -1.554546000 | -0.493944000 | -4.798715000 |
| H | -2.291080000 | -0.223153000 | -5.559993000 |

|   |              |              |              |
|---|--------------|--------------|--------------|
| H | -0.661458000 | -0.862882000 | -5.311970000 |
| H | -1.267097000 | 0.410289000  | -4.252074000 |
| C | -3.340187000 | -4.653936000 | -0.326481000 |
| H | -3.092800000 | -3.583761000 | -0.349096000 |
| C | 2.529647000  | 6.369788000  | 0.340758000  |
| H | 1.746891000  | 6.124998000  | 1.062678000  |
| H | 2.056970000  | 6.655141000  | -0.605533000 |
| H | 3.083058000  | 7.234552000  | 0.722763000  |
| C | 0.879012000  | -5.863553000 | 0.858103000  |
| H | -0.121026000 | -5.701857000 | 1.269356000  |
| H | 1.618854000  | -5.710981000 | 1.651903000  |
| C | 5.808369000  | 0.679774000  | -1.105629000 |
| H | 5.939026000  | 1.400277000  | -1.920183000 |
| H | 5.388012000  | -0.245465000 | -1.510259000 |
| C | -2.107775000 | 5.705556000  | -0.660461000 |
| H | -2.995201000 | 5.121667000  | -0.920349000 |
| H | -1.508537000 | 5.869691000  | -1.562296000 |
| C | 3.913526000  | 1.746700000  | 5.504386000  |
| H | 4.258619000  | 2.434403000  | 6.284701000  |
| H | 4.792710000  | 1.272761000  | 5.055169000  |
| H | 3.320320000  | 0.967539000  | 5.992572000  |
| C | -1.081555000 | 5.681270000  | 1.473922000  |
| H | -0.091749000 | 5.403271000  | 1.844178000  |
| H | -1.834327000 | 5.387703000  | 2.214817000  |
| C | -6.651305000 | 4.055392000  | -1.285010000 |
| H | -7.464150000 | 4.443916000  | -0.679664000 |
| C | -5.630538000 | 3.774595000  | -3.433600000 |
| H | -5.643347000 | 3.942582000  | -4.505516000 |
| C | 1.076791000  | -7.196228000 | 0.154880000  |
| H | 1.361990000  | -7.991877000 | 0.847332000  |
| H | 0.154786000  | -7.496239000 | -0.354210000 |
| C | -1.255334000 | 7.128330000  | 1.055280000  |
| H | -1.472822000 | 7.785350000  | 1.900893000  |
| H | -0.349318000 | 7.489307000  | 0.557644000  |
| C | -6.663881000 | 4.280907000  | -2.654986000 |
| H | -7.475033000 | 4.839850000  | -3.112675000 |
| C | 1.137590000  | 4.692834000  | -2.785380000 |
| H | 0.124074000  | 4.924532000  | -3.128403000 |
| H | 1.809695000  | 5.440814000  | -3.218234000 |
| H | 1.172913000  | 4.820662000  | -1.696976000 |
| C | -1.343518000 | -5.015506000 | 5.663068000  |
| H | -2.164856000 | -5.369214000 | 6.296057000  |
| H | -0.657226000 | -4.458674000 | 6.309247000  |

|   |              |              |              |
|---|--------------|--------------|--------------|
| H | -0.813568000 | -5.891637000 | 5.275741000  |
| C | -2.414478000 | 7.014568000  | 0.061418000  |
| H | -3.365978000 | 6.938352000  | 0.597051000  |
| H | -2.480178000 | 7.857944000  | -0.630055000 |
| C | 3.493141000  | 2.704804000  | -2.904642000 |
| H | 3.751120000  | 2.933371000  | -1.863598000 |
| H | 4.103325000  | 3.370021000  | -3.523649000 |
| H | 3.815209000  | 1.680435000  | -3.130159000 |
| C | 4.548626000  | 5.485468000  | -0.882286000 |
| H | 5.114196000  | 6.388382000  | -0.629026000 |
| H | 4.088318000  | 5.654471000  | -1.860702000 |
| H | 5.258936000  | 4.658691000  | -0.980243000 |
| C | -3.856753000 | 2.236697000  | -5.172723000 |
| H | -4.673089000 | 1.508458000  | -5.191780000 |
| H | -3.007528000 | 1.818411000  | -5.718301000 |
| H | -4.181301000 | 3.126874000  | -5.721469000 |
| C | 1.509304000  | -3.210065000 | -4.985874000 |
| H | 0.503111000  | -2.797380000 | -5.095168000 |
| H | 1.416198000  | -4.254232000 | -4.670834000 |
| H | 1.977738000  | -3.195206000 | -5.975741000 |
| C | -2.300743000 | 3.595258000  | -3.748339000 |
| H | -2.628921000 | 4.535921000  | -4.203876000 |
| H | -1.439117000 | 3.219572000  | -4.307803000 |
| H | -1.975897000 | 3.808046000  | -2.726439000 |
| C | -2.564777000 | -3.405107000 | -4.589787000 |
| H | -1.636796000 | -3.844099000 | -4.968762000 |
| H | -3.223730000 | -3.213591000 | -5.443605000 |
| H | -3.053830000 | -4.152926000 | -3.957083000 |
| C | 2.479663000  | -0.946489000 | -4.443748000 |
| H | 3.042339000  | -0.922543000 | -5.383538000 |
| H | 3.034824000  | -0.364197000 | -3.702822000 |
| H | 1.514090000  | -0.457347000 | -4.602880000 |
| C | -4.667153000 | -4.820428000 | -1.064856000 |
| H | -4.937266000 | -5.873442000 | -1.194400000 |
| H | -4.595995000 | -4.382363000 | -2.065722000 |
| H | -5.485820000 | -4.324485000 | -0.536472000 |
| C | -7.062996000 | 3.179767000  | 1.444017000  |
| H | -7.493628000 | 4.186939000  | 1.446601000  |
| H | -7.023553000 | 2.845316000  | 2.485668000  |
| H | -7.750144000 | 2.526256000  | 0.898247000  |
| C | 7.104468000  | 0.473724000  | -0.304960000 |
| H | 7.864702000  | 1.196102000  | -0.617012000 |
| H | 7.515903000  | -0.526965000 | -0.447837000 |

|   |              |              |              |
|---|--------------|--------------|--------------|
| C | 1.486891000  | 2.795290000  | -5.182484000 |
| H | 2.055107000  | 3.585175000  | -5.686717000 |
| H | 0.445097000  | 2.869241000  | -5.509285000 |
| H | 1.872070000  | 1.830001000  | -5.526027000 |
| C | 6.683161000  | 0.734343000  | 1.147156000  |
| H | 6.314843000  | -0.184104000 | 1.614487000  |
| H | 7.489694000  | 1.138018000  | 1.763771000  |
| C | -2.215800000 | -5.384932000 | -1.067157000 |
| H | -2.164528000 | -5.074657000 | -2.115219000 |
| H | -2.381574000 | -6.467660000 | -1.036668000 |
| H | -1.247052000 | -5.177275000 | -0.606538000 |
| H | 2.038036000  | -1.262488000 | 1.429085000  |
| H | 1.459891000  | 2.077671000  | 2.549687000  |
| H | -1.382116000 | -2.249441000 | 2.816397000  |
| H | -3.383251000 | 2.029438000  | 0.614160000  |
| H | 3.796716000  | -2.017735000 | 0.119014000  |
| H | -0.372778000 | 1.752152000  | -2.485561000 |
| H | -0.179500000 | -1.472811000 | -2.428223000 |
| H | -0.773136000 | -3.135848000 | -2.282005000 |

complex **3** (no dispersion)

|    |              |              |              |
|----|--------------|--------------|--------------|
| Yb | -2.196216000 | 1.696518000  | -0.322261000 |
| Yb | 2.161730000  | -1.616907000 | -0.432572000 |
| Yb | -2.133758000 | -1.772197000 | -0.202741000 |
| Yb | 2.133035000  | 1.801172000  | -0.091546000 |
| P  | -0.014518000 | -0.018416000 | 0.928137000  |
| P  | 0.014726000  | -3.583155000 | -1.208330000 |
| P  | -0.013770000 | 3.743628000  | -0.848563000 |
| P  | -3.808655000 | -0.050395000 | 1.500795000  |
| P  | 3.776459000  | -0.067281000 | 1.524004000  |
| Si | -3.037341000 | 0.757889000  | -3.725267000 |
| Si | 3.367456000  | 0.003584000  | -3.579916000 |
| O  | -3.735493000 | 3.599063000  | 0.183982000  |
| O  | 3.775823000  | -3.518088000 | -0.198123000 |
| O  | -3.767531000 | -3.629636000 | -0.120196000 |
| O  | 3.720834000  | 3.690110000  | 0.145132000  |
| C  | -0.051433000 | 1.029219000  | 3.644986000  |
| C  | -0.050978000 | -0.135506000 | 2.824326000  |
| C  | -0.081530000 | -1.391737000 | 3.498776000  |
| C  | 0.147232000  | -6.473550000 | -1.606546000 |
| C  | 0.010628000  | 2.436573000  | 3.080513000  |
| H  | -0.079289000 | 2.334752000  | 1.991627000  |
| C  | -0.017229000 | -5.178415000 | -2.181441000 |

|   |              |              |              |
|---|--------------|--------------|--------------|
| C | -0.117734000 | -1.453321000 | 4.896162000  |
| H | -0.150498000 | -2.426641000 | 5.381251000  |
| C | 5.433413000  | -0.386072000 | 2.320981000  |
| C | 5.571505000  | -0.821140000 | 3.673507000  |
| C | -0.081765000 | 0.922855000  | 5.039561000  |
| H | -0.074198000 | 1.831245000  | 5.637878000  |
| C | -0.113759000 | -2.722403000 | 2.768138000  |
| C | 2.098244000  | 0.286506000  | -2.226855000 |
| H | 1.225543000  | -0.359006000 | -2.466950000 |
| C | -5.564240000 | -0.187065000 | 2.111921000  |
| C | 0.065679000  | -7.601747000 | -2.430623000 |
| H | 0.183841000  | -8.587676000 | -1.990930000 |
| C | -0.118165000 | -0.307749000 | 5.679118000  |
| H | -0.145757000 | -0.372755000 | 6.763630000  |
| C | -5.886842000 | -0.516933000 | 3.461428000  |
| C | 0.067324000  | 5.494823000  | -1.506742000 |
| C | 1.366455000  | 3.089179000  | 3.378934000  |
| H | 1.514607000  | 3.223363000  | 4.456604000  |
| H | 1.442258000  | 4.075054000  | 2.907519000  |
| H | 2.191898000  | 2.460741000  | 3.020979000  |
| C | -0.223982000 | -5.082659000 | -3.583339000 |
| C | -0.160187000 | -7.501421000 | -3.797406000 |
| H | -0.221242000 | -8.394473000 | -4.413442000 |
| C | 4.382049000  | -1.011580000 | 4.605486000  |
| H | 3.520558000  | -1.289803000 | 3.989826000  |
| C | -2.668446000 | -0.187652000 | -2.141463000 |
| C | 6.611101000  | -0.226601000 | 1.542607000  |
| C | 0.370979000  | -6.698405000 | -0.116016000 |
| H | 0.907060000  | -5.823563000 | 0.269831000  |
| C | -1.477705000 | -3.406130000 | 2.926224000  |
| H | -1.661135000 | -3.683460000 | 3.970662000  |
| H | -1.534797000 | -4.320372000 | 2.324260000  |
| H | -2.293532000 | -2.731367000 | 2.634340000  |
| C | 6.850269000  | -1.047432000 | 4.192082000  |
| H | 6.950418000  | -1.366391000 | 5.225368000  |
| C | 0.250529000  | 5.660666000  | -2.906410000 |
| C | -4.762570000 | 5.090628000  | 1.670339000  |
| H | -5.671960000 | 5.322961000  | 2.230960000  |
| H | -3.898511000 | 5.365584000  | 2.284691000  |
| C | -7.228803000 | -0.568040000 | 3.851962000  |
| H | -7.468969000 | -0.802544000 | 4.885044000  |
| C | -0.232940000 | 6.625016000  | 0.813007000  |
| H | -0.755507000 | 5.692203000  | 1.051846000  |

|   |              |              |              |
|---|--------------|--------------|--------------|
| C | -0.030613000 | 6.665211000  | -0.696609000 |
| C | -3.939042000 | -4.568452000 | -1.211593000 |
| H | -2.951177000 | -4.926653000 | -1.514039000 |
| H | -4.399933000 | -4.034286000 | -2.051903000 |
| C | -3.733491000 | 4.888426000  | -0.483146000 |
| H | -4.041582000 | 4.746789000  | -1.522882000 |
| H | -2.704509000 | 5.258371000  | -0.475346000 |
| C | -1.148297000 | 3.320027000  | 3.555504000  |
| H | -2.112153000 | 2.847185000  | 3.339914000  |
| H | -1.121193000 | 4.294699000  | 3.054305000  |
| H | -1.107479000 | 3.507164000  | 4.634312000  |
| C | 7.865662000  | -0.480878000 | 2.105320000  |
| H | 8.755782000  | -0.358468000 | 1.492619000  |
| C | -0.971326000 | -6.788999000 | 0.625087000  |
| H | -1.579337000 | -5.896710000 | 0.448296000  |
| H | -0.822908000 | -6.893688000 | 1.706260000  |
| H | -1.538108000 | -7.660165000 | 0.276281000  |
| C | -0.394839000 | -3.747156000 | -4.293311000 |
| H | -0.189649000 | -2.949244000 | -3.568602000 |
| C | -4.682114000 | 3.626886000  | 1.275203000  |
| H | -4.315153000 | 2.950631000  | 2.048531000  |
| H | -5.651118000 | 3.249945000  | 0.925227000  |
| C | -0.296512000 | -6.241077000 | -4.361367000 |
| H | -0.465019000 | -6.150665000 | -5.431732000 |
| C | 1.121372000  | 6.603516000  | 1.536047000  |
| H | 1.733035000  | 5.760263000  | 1.201154000  |
| H | 0.992526000  | 6.525674000  | 2.621858000  |
| H | 1.675181000  | 7.526957000  | 1.329066000  |
| C | -6.631368000 | 0.022885000  | 1.193725000  |
| C | 7.997999000  | -0.883624000 | 3.426049000  |
| H | 8.979309000  | -1.071791000 | 3.853511000  |
| C | -4.823396000 | -0.793376000 | 4.516290000  |
| H | -3.936815000 | -1.168390000 | 3.994582000  |
| C | -7.956318000 | -0.056465000 | 1.632116000  |
| H | -8.762688000 | 0.105990000  | 0.921878000  |
| C | 6.574041000  | 0.194373000  | 0.080707000  |
| H | 5.543965000  | 0.496252000  | -0.150897000 |
| C | 4.037826000  | 0.306102000  | 5.316749000  |
| H | 3.124581000  | 0.202808000  | 5.912036000  |
| H | 3.881107000  | 1.114741000  | 4.597390000  |
| H | 4.856185000  | 0.603163000  | 5.983425000  |
| C | 0.339669000  | 4.480803000  | -3.863552000 |
| H | 0.057087000  | 3.575248000  | -3.311492000 |

|   |              |              |              |
|---|--------------|--------------|--------------|
| C | 1.021773000  | -3.663238000 | 3.184600000  |
| H | 1.994407000  | -3.172469000 | 3.077415000  |
| H | 1.019686000  | -4.569137000 | 2.566873000  |
| H | 0.928124000  | -3.980977000 | 4.228906000  |
| C | 1.236862000  | -7.920074000 | 0.216345000  |
| H | 0.716658000  | -8.865123000 | 0.026120000  |
| H | 1.497765000  | -7.912116000 | 1.280257000  |
| H | 2.165592000  | -7.928653000 | -0.363122000 |
| C | -4.423595000 | 0.499385000  | 5.243776000  |
| H | -4.110339000 | 1.271853000  | 4.535441000  |
| H | -3.592032000 | 0.321080000  | 5.933932000  |
| H | -5.270649000 | 0.893892000  | 5.817504000  |
| C | -8.265136000 | -0.337544000 | 2.956060000  |
| H | -9.300026000 | -0.386321000 | 3.284451000  |
| C | -3.598175000 | 2.542973000  | -3.339400000 |
| H | -4.448320000 | 2.554057000  | -2.646272000 |
| H | -3.914929000 | 3.060786000  | -4.251544000 |
| H | -2.784899000 | 3.139708000  | -2.904876000 |
| C | -4.859291000 | -5.657333000 | -0.673728000 |
| H | -5.444548000 | -6.130021000 | -1.466781000 |
| H | -4.276166000 | -6.436138000 | -0.170885000 |
| C | -4.700153000 | 5.777384000  | 0.303688000  |
| H | -5.691096000 | 5.776147000  | -0.163218000 |
| H | -4.355910000 | 6.813386000  | 0.353474000  |
| C | 4.575902000  | -3.781341000 | 0.980734000  |
| H | 4.050800000  | -3.369349000 | 1.843748000  |
| H | 5.533986000  | -3.258380000 | 0.886682000  |
| C | -1.475899000 | 0.850423000  | -4.801928000 |
| H | -1.649770000 | 1.433527000  | -5.712331000 |
| H | -1.157939000 | -0.152711000 | -5.105180000 |
| H | -0.642499000 | 1.305975000  | -4.257665000 |
| C | -6.378582000 | 0.278628000  | -0.284988000 |
| H | -5.352795000 | 0.662227000  | -0.376211000 |
| C | 7.477295000  | 1.401719000  | -0.206096000 |
| H | 7.265913000  | 2.227237000  | 0.480000000  |
| H | 7.332824000  | 1.757388000  | -1.232454000 |
| H | 8.537674000  | 1.149681000  | -0.097187000 |
| C | -4.690270000 | -3.942369000 | 0.954253000  |
| H | -5.102048000 | -3.001374000 | 1.326933000  |
| H | -4.129056000 | -4.429336000 | 1.760689000  |
| C | 3.838317000  | -4.653596000 | -1.099114000 |
| H | 4.134548000  | -4.292878000 | -2.087587000 |
| H | 2.833427000  | -5.081642000 | -1.170628000 |

|   |              |              |              |
|---|--------------|--------------|--------------|
| C | 3.886063000  | 4.746811000  | -0.833691000 |
| H | 2.893927000  | 5.115321000  | -1.106874000 |
| H | 4.368239000  | 4.317093000  | -1.720421000 |
| C | 4.557661000  | -2.136790000 | 5.632719000  |
| H | 5.291244000  | -1.886551000 | 6.407203000  |
| H | 4.874708000  | -3.072294000 | 5.159858000  |
| H | 3.605662000  | -2.318734000 | 6.142371000  |
| C | 4.616664000  | 3.905126000  | 1.263649000  |
| H | 5.041228000  | 2.938012000  | 1.543365000  |
| H | 4.031170000  | 4.289888000  | 2.107601000  |
| C | 0.103738000  | 7.924652000  | -1.292132000 |
| H | 0.040121000  | 8.811931000  | -0.668962000 |
| C | 0.378881000  | 6.941298000  | -3.450734000 |
| H | 0.532506000  | 7.048443000  | -4.521597000 |
| C | -5.711324000 | -4.887940000 | 0.338766000  |
| H | -6.182032000 | -5.530527000 | 1.087485000  |
| H | -6.499465000 | -4.322384000 | -0.169594000 |
| C | 5.625746000  | 4.934225000  | 0.775817000  |
| H | 6.066181000  | 5.502707000  | 1.599193000  |
| H | 6.436810000  | 4.446767000  | 0.224658000  |
| C | 0.316213000  | 8.076659000  | -2.655581000 |
| H | 0.421657000  | 9.066372000  | -3.091656000 |
| C | 4.784222000  | 1.266105000  | -3.428442000 |
| H | 4.417962000  | 2.279574000  | -3.628422000 |
| H | 5.582980000  | 1.059712000  | -4.149174000 |
| H | 5.222479000  | 1.254217000  | -2.425620000 |
| C | -5.216444000 | -1.874483000 | 5.530937000  |
| H | -6.002192000 | -1.541098000 | 6.218062000  |
| H | -4.348342000 | -2.137456000 | 6.145050000  |
| H | -5.569367000 | -2.784417000 | 5.034571000  |
| C | 4.775694000  | 5.789173000  | -0.166844000 |
| H | 4.169014000  | 6.501794000  | 0.401412000  |
| H | 5.365652000  | 6.351774000  | -0.895125000 |
| C | 4.090510000  | -1.755979000 | -3.429245000 |
| H | 4.595852000  | -1.916911000 | -2.470410000 |
| H | 4.825990000  | -1.948421000 | -4.218148000 |
| H | 3.297822000  | -2.506834000 | -3.538585000 |
| C | 6.938182000  | -0.975927000 | -0.842835000 |
| H | 7.956995000  | -1.327939000 | -0.644279000 |
| H | 6.885137000  | -0.680445000 | -1.896367000 |
| H | 6.258928000  | -1.820460000 | -0.692676000 |
| C | -0.631143000 | 4.612744000  | -5.044424000 |
| H | -1.657566000 | 4.769735000  | -4.700480000 |

|   |              |              |              |
|---|--------------|--------------|--------------|
| H | -0.611427000 | 3.706208000  | -5.657364000 |
| H | -0.365850000 | 5.452600000  | -5.695632000 |
| C | -1.837837000 | -3.562448000 | -4.781579000 |
| H | -1.965278000 | -2.590386000 | -5.269996000 |
| H | -2.545136000 | -3.618310000 | -3.948664000 |
| H | -2.110922000 | -4.338597000 | -5.505452000 |
| C | 1.776705000  | 4.285355000  | -4.364132000 |
| H | 2.122764000  | 5.166761000  | -4.915803000 |
| H | 1.845063000  | 3.422243000  | -5.034566000 |
| H | 2.465883000  | 4.123268000  | -3.529916000 |
| C | -4.427196000 | -0.014381000 | -4.777707000 |
| H | -4.193208000 | -1.051553000 | -5.039570000 |
| H | -4.573556000 | 0.543117000  | -5.710061000 |
| H | -5.381648000 | -0.014672000 | -4.239970000 |
| C | 0.598037000  | -3.571772000 | -5.449556000 |
| H | 0.421199000  | -4.297332000 | -6.250897000 |
| H | 1.630932000  | -3.698285000 | -5.111589000 |
| H | 0.501984000  | -2.573386000 | -5.889497000 |
| C | -7.312383000 | 1.323775000  | -0.908224000 |
| H | -8.340897000 | 0.956537000  | -0.993884000 |
| H | -6.979182000 | 1.573499000  | -1.921530000 |
| H | -7.340120000 | 2.246873000  | -0.320916000 |
| C | -1.102116000 | 7.764227000  | 1.361505000  |
| H | -0.589300000 | 8.731782000  | 1.334175000  |
| H | -1.353594000 | 7.569366000  | 2.409760000  |
| H | -2.035651000 | 7.867287000  | 0.799495000  |
| C | 4.848886000  | -5.618344000 | -0.484648000 |
| H | 5.858482000  | -5.406505000 | -0.853732000 |
| H | 4.615977000  | -6.660330000 | -0.718341000 |
| C | 2.696430000  | 0.137706000  | -5.359207000 |
| H | 3.487016000  | -0.037064000 | -6.098307000 |
| H | 2.272308000  | 1.128513000  | -5.551032000 |
| H | 1.904743000  | -0.597285000 | -5.535404000 |
| C | 4.752193000  | -5.290760000 | 1.006829000  |
| H | 3.874086000  | -5.772064000 | 1.451001000  |
| H | 5.634672000  | -5.594489000 | 1.576106000  |
| C | -6.457460000 | -1.033614000 | -1.079532000 |
| H | -6.251388000 | -0.867840000 | -2.142925000 |
| H | -7.458956000 | -1.471893000 | -0.995363000 |
| H | -5.736380000 | -1.766301000 | -0.705367000 |
| H | 0.027667000  | -2.488901000 | 1.704383000  |
| H | 2.933495000  | -0.087011000 | 2.666375000  |
| H | -3.107235000 | 0.055700000  | 2.731282000  |

|   |              |              |              |
|---|--------------|--------------|--------------|
| H | -0.029222000 | 4.042059000  | 0.551122000  |
| H | 0.071604000  | -4.130715000 | 0.112065000  |
| H | 1.678233000  | 1.288880000  | -2.458843000 |
| H | -1.932784000 | -0.938248000 | -2.501197000 |
| H | -3.608373000 | -0.746610000 | -1.947677000 |

complex 4 (dispersion)

|    |              |              |              |
|----|--------------|--------------|--------------|
| Yb | 0.223189000  | 2.309556000  | 0.388672000  |
| Yb | 3.056467000  | 0.161495000  | -0.338152000 |
| Yb | 0.301293000  | -2.325259000 | -0.485061000 |
| Yb | -2.407461000 | 0.440026000  | -1.642543000 |
| Yb | -2.039916000 | -0.428667000 | 2.050005000  |
| P  | 0.812225000  | -0.275052000 | 1.473032000  |
| P  | 0.540560000  | 0.355047000  | -1.706625000 |
| P  | -2.502202000 | 1.991097000  | 0.829246000  |
| P  | -2.469770000 | -1.959190000 | -0.267799000 |
| P  | 2.949923000  | 3.074384000  | -0.129488000 |
| P  | 3.231031000  | -2.681287000 | -0.693195000 |
| O  | -2.366735000 | -0.217836000 | 4.429270000  |
| O  | -3.020409000 | -0.065516000 | -3.964930000 |
| O  | -0.106165000 | -4.712528000 | -0.316338000 |
| O  | 4.262955000  | 0.384189000  | -2.414661000 |
| O  | -4.575697000 | 1.484749000  | -2.006737000 |
| C  | 1.716462000  | 0.522285000  | 4.069246000  |
| C  | 1.316243000  | -0.392756000 | -4.369493000 |
| C  | 0.759277000  | 0.623669000  | -3.533465000 |
| C  | 2.169904000  | 1.813199000  | 3.417878000  |
| H  | 2.490225000  | 1.541766000  | 2.401269000  |
| C  | 1.105167000  | -0.508557000 | 3.290791000  |
| C  | -3.760975000 | -3.271746000 | -0.279985000 |
| C  | 1.881258000  | 0.359675000  | 5.446484000  |
| H  | 2.351406000  | 1.148937000  | 6.025113000  |
| C  | 0.693665000  | -1.698068000 | 3.964864000  |
| C  | 1.003757000  | 2.798066000  | 3.265402000  |
| H  | 1.290845000  | 3.637679000  | 2.617151000  |
| H  | 0.717632000  | 3.219360000  | 4.235280000  |
| C  | -3.684399000 | 3.393725000  | 1.024207000  |
| C  | -4.374680000 | -3.717781000 | 0.927238000  |
| C  | 4.061915000  | 4.410554000  | 0.534545000  |
| C  | -4.109448000 | -3.942255000 | -1.485394000 |
| C  | -3.495815000 | -3.552021000 | -2.816099000 |
| H  | -3.023872000 | -2.574491000 | -2.662093000 |
| C  | 4.541429000  | -3.440988000 | 1.692521000  |

|   |              |              |              |
|---|--------------|--------------|--------------|
| C | 0.353728000  | 1.834524000  | -4.160412000 |
| C | 1.423112000  | -0.191147000 | -5.746990000 |
| H | 1.839849000  | -0.977614000 | -6.368693000 |
| C | 3.338509000  | 2.505716000  | 4.111383000  |
| H | 3.053983000  | 2.917485000  | 5.086140000  |
| H | 3.691351000  | 3.340614000  | 3.498483000  |
| H | 4.172704000  | 1.815929000  | 4.267485000  |
| C | 4.193072000  | -3.841604000 | 0.375839000  |
| C | 1.779071000  | -1.708988000 | -3.782584000 |
| H | 2.177538000  | -1.464516000 | -2.790878000 |
| C | 0.604695000  | -2.669908000 | -3.574427000 |
| H | 0.924529000  | -3.557980000 | -3.012918000 |
| H | 0.207093000  | -3.017540000 | -4.533678000 |
| C | 3.753077000  | 5.775614000  | 0.314593000  |
| C | -0.238154000 | 2.987130000  | -3.376265000 |
| H | -0.267641000 | 2.652324000  | -2.329051000 |
| C | 4.269463000  | -2.025669000 | 2.178942000  |
| H | 3.264693000  | -1.733279000 | 1.835721000  |
| C | 0.863883000  | -1.810045000 | 5.347799000  |
| H | 0.542996000  | -2.715707000 | 5.853650000  |
| C | 5.214315000  | 4.079359000  | 1.291983000  |
| C | 5.186894000  | -4.344696000 | 2.537900000  |
| H | 5.441271000  | -4.042144000 | 3.548037000  |
| C | 5.278055000  | -1.048538000 | 1.564120000  |
| H | 5.336840000  | -1.176684000 | 0.475848000  |
| H | 6.282419000  | -1.221312000 | 1.964124000  |
| H | 5.009766000  | -0.012872000 | 1.810520000  |
| C | -4.912540000 | 3.249074000  | 1.733384000  |
| C | 1.013553000  | 0.996790000  | -6.344877000 |
| H | 1.107145000  | 1.136699000  | -7.418002000 |
| C | 0.488799000  | 2.000664000  | -5.541552000 |
| H | 0.173777000  | 2.938391000  | -5.994504000 |
| C | 0.121146000  | -2.884809000 | 3.203868000  |
| H | -0.476027000 | -2.488845000 | 2.362752000  |
| C | -2.941444000 | -0.861922000 | 5.578668000  |
| H | -2.733303000 | -1.932109000 | 5.517812000  |
| H | -4.027681000 | -0.709955000 | 5.553768000  |
| C | -2.059839000 | 4.928233000  | -0.210718000 |
| H | -1.828621000 | 4.010633000  | -0.778121000 |
| C | 1.449964000  | -0.793399000 | 6.094858000  |
| H | 1.581685000  | -0.904871000 | 7.167420000  |
| C | -2.090829000 | -0.724012000 | -4.850627000 |
| H | -2.214651000 | -1.808497000 | -4.751856000 |

|   |              |              |              |
|---|--------------|--------------|--------------|
| H | -1.086164000 | -0.444132000 | -4.542798000 |
| C | -2.384724000 | -4.531450000 | -3.204533000 |
| H | -1.596759000 | -4.532255000 | -2.444896000 |
| H | -1.930221000 | -4.256628000 | -4.163433000 |
| H | -2.773705000 | -5.552268000 | -3.297451000 |
| C | -3.397776000 | 4.672382000  | 0.456935000  |
| C | 4.542237000  | -5.145792000 | -0.061521000 |
| C | -1.601505000 | 0.946660000  | 4.848185000  |
| H | -1.818248000 | 1.749135000  | 4.136784000  |
| H | -0.542705000 | 0.691593000  | 4.800271000  |
| C | 5.653601000  | 2.635181000  | 1.476648000  |
| H | 4.741317000  | 2.047096000  | 1.645941000  |
| C | 2.579197000  | 6.195771000  | -0.546088000 |
| H | 1.897537000  | 5.337031000  | -0.581619000 |
| C | -1.672733000 | 3.288179000  | -3.812916000 |
| H | -1.704079000 | 3.667655000  | -4.840387000 |
| H | -2.132157000 | 4.039322000  | -3.164494000 |
| H | -2.289816000 | 2.382473000  | -3.794519000 |
| C | -4.092371000 | -3.010246000 | 2.239823000  |
| H | -2.999519000 | -2.834346000 | 2.245250000  |
| C | 5.518944000  | -5.625243000 | 2.109609000  |
| H | 6.023290000  | -6.314398000 | 2.781217000  |
| C | -6.691567000 | 1.536051000  | 2.432668000  |
| H | -6.809288000 | 0.559960000  | 2.914696000  |
| H | -7.049327000 | 1.446700000  | 1.403656000  |
| H | -7.353339000 | 2.235025000  | 2.955966000  |
| C | -5.803819000 | 4.320179000  | 1.827465000  |
| H | -6.731272000 | 4.190995000  | 2.379189000  |
| C | 4.581021000  | 6.766300000  | 0.849705000  |
| H | 4.344692000  | 7.811457000  | 0.671024000  |
| C | 2.887521000  | -2.403108000 | -4.568117000 |
| H | 3.256300000  | -3.265435000 | -4.004615000 |
| H | 3.730417000  | -1.728950000 | -4.747508000 |
| H | 2.539209000  | -2.777132000 | -5.537517000 |
| C | 4.269553000  | -1.854800000 | 3.695067000  |
| H | 5.266010000  | -2.019373000 | 4.120627000  |
| H | 3.567579000  | -2.535331000 | 4.181930000  |
| H | 3.962082000  | -0.839325000 | 3.952315000  |
| C | -5.256772000 | -4.799788000 | 0.910701000  |
| H | -5.711259000 | -5.138111000 | 1.836684000  |
| C | -5.229927000 | 1.975088000  | 2.486898000  |
| H | -4.613644000 | 1.193688000  | 2.023760000  |
| C | 3.957962000  | 1.375119000  | -3.409629000 |

|   |              |              |              |
|---|--------------|--------------|--------------|
| H | 3.074839000  | 1.912592000  | -3.067156000 |
| H | 3.715912000  | 0.873221000  | -4.353738000 |
| C | -0.970669000 | 5.097978000  | 0.859113000  |
| H | -1.056377000 | 4.305458000  | 1.614250000  |
| H | -1.088690000 | 6.052185000  | 1.381837000  |
| H | 0.038310000  | 5.098060000  | 0.421993000  |
| C | 5.204680000  | -6.010920000 | 0.813198000  |
| H | 5.473957000  | -7.007166000 | 0.474962000  |
| C | 6.005210000  | 5.101298000  | 1.823019000  |
| H | 6.884689000  | 4.850148000  | 2.406316000  |
| C | -4.221441000 | 0.276412000  | -4.689472000 |
| H | -4.350020000 | 1.360506000  | -4.626986000 |
| H | -5.074061000 | -0.204112000 | -4.204209000 |
| C | 6.311586000  | 2.120776000  | 0.191274000  |
| H | 7.179344000  | 2.738751000  | -0.062562000 |
| H | 5.600493000  | 2.165922000  | -0.637943000 |
| H | 6.654745000  | 1.086928000  | 0.310935000  |
| C | 0.645571000  | 4.231056000  | -3.442638000 |
| H | 1.661257000  | 4.000671000  | -3.112913000 |
| H | 0.256617000  | 5.021194000  | -2.793900000 |
| H | 0.703669000  | 4.631655000  | -4.460583000 |
| C | -5.598909000 | 0.943742000  | -1.149738000 |
| H | -5.286500000 | 1.074860000  | -0.107508000 |
| H | -5.679428000 | -0.124196000 | -1.370812000 |
| C | -4.832780000 | 2.887858000  | -2.226042000 |
| H | -4.788599000 | 3.057140000  | -3.307602000 |
| H | -4.054173000 | 3.474639000  | -1.734253000 |
| C | -5.566104000 | -5.464447000 | -0.270912000 |
| H | -6.247909000 | -6.310189000 | -0.265457000 |
| C | 5.696223000  | 6.439292000  | 1.607531000  |
| H | 6.325627000  | 7.220268000  | 2.025250000  |
| C | -4.992659000 | -5.023470000 | -1.457382000 |
| H | -5.229576000 | -5.539250000 | -2.384943000 |
| C | 4.256807000  | -5.598394000 | -1.480371000 |
| H | 3.360202000  | -5.057093000 | -1.805122000 |
| C | 3.053521000  | 6.469072000  | -1.977827000 |
| H | 2.212239000  | 6.718491000  | -2.633392000 |
| H | 3.564592000  | 5.595651000  | -2.394563000 |
| H | 3.759902000  | 7.306717000  | -1.994341000 |
| C | 1.801239000  | 7.388474000  | 0.011652000  |
| H | 2.380799000  | 8.316950000  | -0.030564000 |
| H | 1.510987000  | 7.220264000  | 1.053047000  |
| H | 0.889399000  | 7.551049000  | -0.572699000 |

|   |              |              |              |
|---|--------------|--------------|--------------|
| C | -4.817084000 | -1.657015000 | 2.268187000  |
| H | -5.899740000 | -1.814842000 | 2.255127000  |
| H | -4.567323000 | -1.064461000 | 1.377125000  |
| H | -4.587156000 | -1.078723000 | 3.173517000  |
| C | -2.299452000 | -0.195963000 | 6.787316000  |
| H | -2.942108000 | -0.231726000 | 7.670417000  |
| H | -1.348527000 | -0.685331000 | 7.018849000  |
| C | -1.275099000 | -5.264422000 | 0.338136000  |
| H | -2.082442000 | -5.347875000 | -0.393633000 |
| H | -1.593546000 | -4.552305000 | 1.101209000  |
| C | -3.997271000 | -0.188776000 | -6.127209000 |
| H | -4.416322000 | -1.189028000 | -6.275094000 |
| H | -4.464776000 | 0.483652000  | -6.851105000 |
| C | -4.770806000 | 2.125205000  | 3.939614000  |
| H | -5.376588000 | 2.877034000  | 4.458065000  |
| H | -3.729550000 | 2.452911000  | 3.970623000  |
| H | -4.858915000 | 1.178459000  | 4.484323000  |
| C | -5.532147000 | 5.545217000  | 1.229940000  |
| H | -6.241102000 | 6.365246000  | 1.299661000  |
| C | -2.040391000 | 1.220679000  | 6.272807000  |
| H | -1.266365000 | 1.745183000  | 6.837670000  |
| H | -2.957723000 | 1.817582000  | 6.293368000  |
| C | -0.789936000 | -3.796569000 | 4.020736000  |
| H | -0.233921000 | -4.365923000 | 4.773124000  |
| H | -1.275109000 | -4.522400000 | 3.361693000  |
| H | -1.574710000 | -3.235804000 | 4.534091000  |
| C | -4.326521000 | 5.709737000  | 0.554843000  |
| H | -4.102675000 | 6.672421000  | 0.105766000  |
| C | 5.406894000  | -5.186794000 | -2.409278000 |
| H | 5.605233000  | -4.113435000 | -2.337996000 |
| H | 5.177631000  | -5.426154000 | -3.454123000 |
| H | 6.325860000  | -5.714834000 | -2.131444000 |
| C | 0.863673000  | -5.752473000 | -0.564666000 |
| H | 1.740529000  | -5.567829000 | 0.066032000  |
| H | 1.170978000  | -5.690913000 | -1.611512000 |
| C | -4.536226000 | -3.412371000 | -3.927396000 |
| H | -5.031534000 | -4.361679000 | -4.157925000 |
| H | -4.064733000 | -3.066588000 | -4.853883000 |
| H | -5.312969000 | -2.693360000 | -3.647489000 |
| C | 5.598886000  | -0.064399000 | -2.672839000 |
| H | 6.020280000  | -0.405519000 | -1.724727000 |
| H | 5.558537000  | -0.919752000 | -3.357290000 |
| C | 3.970400000  | -7.094238000 | -1.618581000 |

|   |              |              |              |
|---|--------------|--------------|--------------|
| H | 4.867941000  | -7.702301000 | -1.462512000 |
| H | 3.605603000  | -7.315799000 | -2.627163000 |
| H | 3.214837000  | -7.427729000 | -0.900718000 |
| C | 6.584004000  | 2.399740000  | 2.665480000  |
| H | 6.710366000  | 1.325600000  | 2.832414000  |
| H | 6.195240000  | 2.844202000  | 3.585140000  |
| H | 7.581143000  | 2.815267000  | 2.483249000  |
| C | -0.829844000 | -6.618477000 | 0.861115000  |
| H | -1.671574000 | -7.303948000 | 0.985283000  |
| H | -0.323019000 | -6.516441000 | 1.827229000  |
| C | -2.471962000 | -0.231954000 | -6.231925000 |
| H | -2.106686000 | -0.888009000 | -7.025273000 |
| H | -2.053454000 | 0.766309000  | -6.390912000 |
| C | -4.430718000 | -3.814499000 | 3.491642000  |
| H | -4.098822000 | -3.279242000 | 4.385690000  |
| H | -3.946181000 | -4.795158000 | 3.484303000  |
| H | -5.510197000 | -3.968511000 | 3.594379000  |
| C | 1.243321000  | -3.706341000 | 2.565651000  |
| H | 1.811472000  | -3.103861000 | 1.852860000  |
| H | 0.842147000  | -4.571582000 | 2.033746000  |
| H | 1.946178000  | -4.066160000 | 3.322075000  |
| C | -2.034229000 | 6.109867000  | -1.175217000 |
| H | -2.815340000 | 6.028884000  | -1.938239000 |
| H | -1.066990000 | 6.161521000  | -1.683396000 |
| H | -2.171284000 | 7.063889000  | -0.654518000 |
| C | -6.825240000 | 1.770384000  | -1.490251000 |
| H | -7.262053000 | 1.424883000  | -2.434006000 |
| H | -7.595396000 | 1.722705000  | -0.717065000 |
| C | 0.160980000  | -7.059534000 | -0.217423000 |
| H | 0.862472000  | -7.826091000 | 0.120781000  |
| H | -0.378012000 | -7.447902000 | -1.088081000 |
| C | 5.232052000  | 2.196358000  | -3.495299000 |
| H | 5.322242000  | 2.726454000  | -4.446539000 |
| H | 5.244307000  | 2.933795000  | -2.687376000 |
| C | -6.216523000 | 3.168048000  | -1.637244000 |
| H | -6.113492000 | 3.638970000  | -0.657872000 |
| H | -6.809030000 | 3.827252000  | -2.276437000 |
| C | 6.337280000  | 1.139243000  | -3.291279000 |
| H | 6.799296000  | 0.855576000  | -4.240751000 |
| H | 7.127865000  | 1.508135000  | -2.634266000 |
| H | 3.752829000  | -3.016681000 | -1.969444000 |
| H | 0.103552000  | 2.300798000  | 2.874891000  |
| H | -0.227622000 | -2.179589000 | -3.050706000 |

|                           |              |              |              |
|---------------------------|--------------|--------------|--------------|
| H                         | 2.892497000  | 3.498173000  | -1.490997000 |
| complex 4 (no dispersion) |              |              |              |
| Yb                        | 0.315108000  | 2.311182000  | 0.396785000  |
| Yb                        | 3.074009000  | 0.105166000  | -0.341375000 |
| Yb                        | 0.168342000  | -2.330416000 | -0.364674000 |
| Yb                        | -2.568264000 | 0.482712000  | -1.673612000 |
| Yb                        | -2.166494000 | -0.221838000 | 2.072956000  |
| P                         | 0.757813000  | -0.274036000 | 1.643727000  |
| P                         | 0.547697000  | 0.323720000  | -1.800021000 |
| P                         | -2.496747000 | 2.234503000  | 0.718713000  |
| P                         | -2.712489000 | -1.940037000 | -0.158791000 |
| P                         | 3.178794000  | 3.117812000  | 0.062100000  |
| P                         | 3.249007000  | -2.836638000 | -0.456674000 |
| O                         | -2.740941000 | -0.136520000 | 4.488871000  |
| O                         | -2.970379000 | 0.349607000  | -4.195889000 |
| O                         | -0.171325000 | -4.793569000 | -0.249434000 |
| O                         | 4.735027000  | 0.305097000  | -2.163638000 |
| O                         | -4.984020000 | 1.117646000  | -1.964105000 |
| C                         | 1.599913000  | 0.582127000  | 4.274778000  |
| C                         | 1.530850000  | -0.528336000 | -4.398027000 |
| C                         | 1.019102000  | 0.557565000  | -3.614174000 |
| C                         | 1.989910000  | 1.914686000  | 3.652552000  |
| H                         | 2.277299000  | 1.693137000  | 2.614977000  |
| C                         | 1.037982000  | -0.480786000 | 3.495292000  |
| C                         | -4.036670000 | -3.253700000 | -0.368862000 |
| C                         | 1.804634000  | 0.416532000  | 5.648454000  |
| H                         | 2.233318000  | 1.232403000  | 6.223275000  |
| C                         | 0.712660000  | -1.693684000 | 4.178672000  |
| C                         | 0.804125000  | 2.889682000  | 3.598756000  |
| H                         | 1.083131000  | 3.811121000  | 3.070313000  |
| H                         | 0.490557000  | 3.180249000  | 4.608524000  |
| C                         | -3.687731000 | 3.675451000  | 0.830457000  |
| C                         | -4.773338000 | -3.758559000 | 0.748772000  |
| C                         | 4.383701000  | 4.445526000  | 0.648964000  |
| C                         | -4.331381000 | -3.827013000 | -1.643097000 |
| C                         | -3.657435000 | -3.384181000 | -2.933116000 |
| H                         | -3.025168000 | -2.525157000 | -2.674387000 |
| C                         | 4.861851000  | -3.574871000 | 1.768230000  |
| C                         | 0.852255000  | 1.811452000  | -4.278249000 |
| C                         | 1.815238000  | -0.346400000 | -5.756025000 |
| H                         | 2.193646000  | -1.183044000 | -6.335563000 |
| C                         | 3.183171000  | 2.601553000  | 4.323172000  |

|   |              |              |              |
|---|--------------|--------------|--------------|
| H | 2.927796000  | 3.012445000  | 5.307085000  |
| H | 3.524921000  | 3.438226000  | 3.705739000  |
| H | 4.020878000  | 1.910639000  | 4.456367000  |
| C | 4.420801000  | -3.959356000 | 0.471666000  |
| C | 1.762694000  | -1.911134000 | -3.807566000 |
| H | 2.082083000  | -1.749158000 | -2.768542000 |
| C | 0.467114000  | -2.730795000 | -3.759361000 |
| H | 0.631643000  | -3.696755000 | -3.264234000 |
| H | 0.102617000  | -2.943449000 | -4.770998000 |
| C | 4.147228000  | 5.819709000  | 0.376241000  |
| C | 0.311843000  | 3.051099000  | -3.584837000 |
| H | 0.246929000  | 2.801481000  | -2.517729000 |
| C | 4.473550000  | -2.231157000 | 2.372306000  |
| H | 3.447435000  | -1.995707000 | 2.053693000  |
| C | 0.945509000  | -1.811361000 | 5.555012000  |
| H | 0.710188000  | -2.749044000 | 6.052852000  |
| C | 5.549765000  | 4.093308000  | 1.382181000  |
| C | 5.724694000  | -4.407920000 | 2.484899000  |
| H | 6.054001000  | -4.109174000 | 3.475307000  |
| C | 5.395303000  | -1.131804000 | 1.825488000  |
| H | 5.424450000  | -1.157534000 | 0.728661000  |
| H | 6.422767000  | -1.278544000 | 2.177200000  |
| H | 5.070840000  | -0.139937000 | 2.164257000  |
| C | -4.918821000 | 3.587397000  | 1.549033000  |
| C | 1.628022000  | 0.876424000  | -6.389356000 |
| H | 1.854705000  | 0.994805000  | -7.445708000 |
| C | 1.154586000  | 1.942891000  | -5.639380000 |
| H | 1.011700000  | 2.907780000  | -6.120787000 |
| C | 0.135531000  | -2.917255000 | 3.476880000  |
| H | -0.211530000 | -2.575128000 | 2.490999000  |
| C | -3.661286000 | -0.800005000 | 5.380462000  |
| H | -3.719130000 | -1.851956000 | 5.091960000  |
| H | -4.654501000 | -0.347319000 | 5.267731000  |
| C | -2.058619000 | 5.157747000  | -0.491196000 |
| H | -1.784488000 | 4.208754000  | -0.977178000 |
| C | 1.482795000  | -0.770071000 | 6.298831000  |
| H | 1.659658000  | -0.882967000 | 7.365273000  |
| C | -2.061197000 | -0.329613000 | -5.099895000 |
| H | -2.211728000 | -1.409720000 | -4.990134000 |
| H | -1.041643000 | -0.076074000 | -4.808960000 |
| C | -2.747238000 | -4.481056000 | -3.500165000 |
| H | -1.963623000 | -4.746712000 | -2.783760000 |
| H | -2.259229000 | -4.150548000 | -4.424589000 |

|   |              |              |              |
|---|--------------|--------------|--------------|
| H | -3.313146000 | -5.390787000 | -3.732234000 |
| C | -3.402805000 | 4.915343000  | 0.175496000  |
| C | 4.879690000  | -5.196132000 | -0.062499000 |
| C | -1.912046000 | 0.793142000  | 5.249361000  |
| H | -1.939619000 | 1.759211000  | 4.739580000  |
| H | -0.889504000 | 0.408378000  | 5.251075000  |
| C | 5.944514000  | 2.645810000  | 1.642593000  |
| H | 5.015997000  | 2.065711000  | 1.706937000  |
| C | 2.954872000  | 6.318545000  | -0.424380000 |
| H | 2.257367000  | 5.478159000  | -0.514532000 |
| C | -1.103136000 | 3.382644000  | -4.076131000 |
| H | -1.094860000 | 3.653864000  | -5.138853000 |
| H | -1.528568000 | 4.224988000  | -3.521394000 |
| H | -1.769692000 | 2.520491000  | -3.966818000 |
| C | -4.613230000 | -3.174705000 | 2.142698000  |
| H | -3.567188000 | -2.835596000 | 2.205955000  |
| C | 6.179820000  | -5.608584000 | 1.954192000  |
| H | 6.855290000  | -6.242194000 | 2.523015000  |
| C | -6.713689000 | 1.978762000  | 2.460529000  |
| H | -6.832046000 | 1.048525000  | 3.027357000  |
| H | -7.100162000 | 1.806073000  | 1.451327000  |
| H | -7.357926000 | 2.725492000  | 2.938278000  |
| C | -5.824326000 | 4.654201000  | 1.534706000  |
| H | -6.755683000 | 4.567028000  | 2.088868000  |
| C | 5.061180000  | 6.782674000  | 0.819728000  |
| H | 4.877902000  | 7.829835000  | 0.593145000  |
| C | 2.853934000  | -2.726509000 | -4.506484000 |
| H | 3.072245000  | -3.628909000 | -3.926710000 |
| H | 3.783849000  | -2.158542000 | -4.608884000 |
| H | 2.549991000  | -3.057583000 | -5.506403000 |
| C | 4.478422000  | -2.190069000 | 3.903089000  |
| H | 5.495878000  | -2.233109000 | 4.308940000  |
| H | 3.907144000  | -3.017743000 | 4.331317000  |
| H | 4.024776000  | -1.258649000 | 4.253702000  |
| C | -5.714841000 | -4.778306000 | 0.579897000  |
| H | -6.264797000 | -5.144396000 | 1.442194000  |
| C | -5.242243000 | 2.404080000  | 2.445069000  |
| H | -4.644551000 | 1.562328000  | 2.068255000  |
| C | 4.673156000  | 1.347658000  | -3.170079000 |
| H | 4.984713000  | 2.290282000  | -2.705234000 |
| H | 3.636136000  | 1.433313000  | -3.502406000 |
| C | -0.995647000 | 5.457743000  | 0.577743000  |
| H | -1.032006000 | 4.706795000  | 1.377027000  |

|   |              |              |              |
|---|--------------|--------------|--------------|
| H | -1.179038000 | 6.432815000  | 1.042851000  |
| H | 0.014319000  | 5.486157000  | 0.148603000  |
| C | 5.757730000  | -5.986797000 | 0.687536000  |
| H | 6.114128000  | -6.924744000 | 0.270336000  |
| C | 6.423326000  | 5.094141000  | 1.820811000  |
| H | 7.311017000  | 4.817825000  | 2.381326000  |
| C | -4.073888000 | 0.905241000  | -4.946104000 |
| H | -3.969985000 | 1.998132000  | -4.948045000 |
| H | -5.000445000 | 0.638744000  | -4.434634000 |
| C | 6.748392000  | 2.106204000  | 0.450415000  |
| H | 7.655109000  | 2.703472000  | 0.301413000  |
| H | 6.152559000  | 2.150402000  | -0.466174000 |
| H | 7.053485000  | 1.066769000  | 0.619991000  |
| C | 1.232919000  | 4.265420000  | -3.736324000 |
| H | 2.246898000  | 4.040097000  | -3.394739000 |
| H | 0.859138000  | 5.106907000  | -3.143582000 |
| H | 1.297637000  | 4.604830000  | -4.776250000 |
| C | -5.957537000 | 0.354970000  | -1.224862000 |
| H | -5.779583000 | 0.488110000  | -0.150725000 |
| H | -5.815763000 | -0.699089000 | -1.474401000 |
| C | -5.469901000 | 2.476675000  | -2.099563000 |
| H | -5.313458000 | 2.768411000  | -3.142678000 |
| H | -4.886139000 | 3.131108000  | -1.446482000 |
| C | -5.969746000 | -5.341483000 | -0.663667000 |
| H | -6.699543000 | -6.139197000 | -0.774228000 |
| C | 6.190552000  | 6.434324000  | 1.543912000  |
| H | 6.884469000  | 7.197101000  | 1.887708000  |
| C | -5.275112000 | -4.854164000 | -1.760280000 |
| H | -5.469782000 | -5.282574000 | -2.741434000 |
| C | 4.492707000  | -5.683477000 | -1.451943000 |
| H | 3.546977000  | -5.194182000 | -1.709452000 |
| C | 3.388654000  | 6.727658000  | -1.839425000 |
| H | 2.529179000  | 7.051674000  | -2.437335000 |
| H | 3.873417000  | 5.897137000  | -2.361968000 |
| H | 4.103544000  | 7.557989000  | -1.804366000 |
| C | 2.210811000  | 7.467084000  | 0.268911000  |
| H | 2.820988000  | 8.374406000  | 0.335922000  |
| H | 1.911665000  | 7.191480000  | 1.284968000  |
| H | 1.306665000  | 7.728725000  | -0.291803000 |
| C | -5.525275000 | -1.948130000 | 2.291442000  |
| H | -6.575043000 | -2.238146000 | 2.169115000  |
| H | -5.290273000 | -1.203453000 | 1.523125000  |
| H | -5.425459000 | -1.478724000 | 3.277379000  |

|   |              |              |              |
|---|--------------|--------------|--------------|
| C | -3.103473000 | -0.576731000 | 6.777529000  |
| H | -3.874185000 | -0.655156000 | 7.548917000  |
| H | -2.317589000 | -1.307898000 | 6.994095000  |
| C | -1.368361000 | -5.392442000 | 0.312711000  |
| H | -2.160076000 | -5.374647000 | -0.442068000 |
| H | -1.691527000 | -4.772616000 | 1.151481000  |
| C | -3.952664000 | 0.342686000  | -6.356840000 |
| H | -4.472579000 | -0.618212000 | -6.432958000 |
| H | -4.375152000 | 1.017935000  | -7.106010000 |
| C | -4.767202000 | 2.721978000  | 3.869912000  |
| H | -5.320437000 | 3.576517000  | 4.276395000  |
| H | -3.704590000 | 2.982370000  | 3.867043000  |
| H | -4.921095000 | 1.870230000  | 4.542709000  |
| C | -5.557469000 | 5.829620000  | 0.845863000  |
| H | -6.275654000 | 6.645365000  | 0.839913000  |
| C | -2.506076000 | 0.825685000  | 6.650881000  |
| H | -1.745358000 | 1.039772000  | 7.405480000  |
| H | -3.290644000 | 1.586112000  | 6.726510000  |
| C | -1.073129000 | -3.516128000 | 4.205421000  |
| H | -0.796297000 | -3.969180000 | 5.163886000  |
| H | -1.534724000 | -4.302698000 | 3.599513000  |
| H | -1.832833000 | -2.755370000 | 4.408200000  |
| C | -4.340466000 | 5.952264000  | 0.186615000  |
| H | -4.112902000 | 6.882216000  | -0.325400000 |
| C | 5.541293000  | -5.250281000 | -2.488094000 |
| H | 5.687440000  | -4.165895000 | -2.474115000 |
| H | 5.243619000  | -5.542903000 | -3.502112000 |
| H | 6.508813000  | -5.717810000 | -2.271846000 |
| C | 0.790252000  | -5.828069000 | -0.567846000 |
| H | 1.634400000  | -5.743810000 | 0.124531000  |
| H | 1.160654000  | -5.651808000 | -1.580965000 |
| C | -4.680403000 | -2.931367000 | -3.983014000 |
| H | -5.355139000 | -3.743653000 | -4.274376000 |
| H | -4.177086000 | -2.590266000 | -4.894775000 |
| H | -5.298976000 | -2.109961000 | -3.606889000 |
| C | 5.887390000  | -0.537510000 | -2.391973000 |
| H | 6.419176000  | -0.663223000 | -1.444828000 |
| H | 5.534376000  | -1.519283000 | -2.724638000 |
| C | 4.256526000  | -7.196708000 | -1.540061000 |
| H | 5.185270000  | -7.769463000 | -1.443427000 |
| H | 3.825829000  | -7.453900000 | -2.514393000 |
| H | 3.570662000  | -7.544216000 | -0.760766000 |
| C | 6.721728000  | 2.427974000  | 2.945381000  |

|                        |              |              |              |
|------------------------|--------------|--------------|--------------|
| H                      | 6.809347000  | 1.356914000  | 3.154995000  |
| H                      | 6.229067000  | 2.903061000  | 3.798527000  |
| H                      | 7.742608000  | 2.821448000  | 2.884583000  |
| C                      | -0.969191000 | -6.812274000 | 0.684896000  |
| H                      | -1.828783000 | -7.487437000 | 0.705452000  |
| H                      | -0.489570000 | -6.838629000 | 1.670044000  |
| C                      | -2.441787000 | 0.147584000  | -6.492763000 |
| H                      | -2.163415000 | -0.573292000 | -7.265759000 |
| H                      | -1.943286000 | 1.096095000  | -6.716845000 |
| C                      | -4.855428000 | -4.171018000 | 3.280798000  |
| H                      | -4.560046000 | -3.735930000 | 4.241904000  |
| H                      | -4.281178000 | -5.092171000 | 3.140294000  |
| H                      | -5.911917000 | -4.446104000 | 3.374907000  |
| C                      | 1.198075000  | -3.997676000 | 3.242509000  |
| H                      | 2.019780000  | -3.628625000 | 2.624499000  |
| H                      | 0.762702000  | -4.865703000 | 2.734790000  |
| H                      | 1.618903000  | -4.344637000 | 4.193192000  |
| C                      | -2.050726000 | 6.255758000  | -1.557451000 |
| H                      | -2.827923000 | 6.097525000  | -2.312815000 |
| H                      | -1.082142000 | 6.278130000  | -2.068343000 |
| H                      | -2.202230000 | 7.251916000  | -1.125968000 |
| C                      | -7.288984000 | 0.951477000  | -1.649951000 |
| H                      | -7.577157000 | 0.569660000  | -2.635800000 |
| H                      | -8.094574000 | 0.720361000  | -0.947735000 |
| C                      | 0.043563000  | -7.148014000 | -0.410658000 |
| H                      | 0.714009000  | -7.970984000 | -0.149244000 |
| H                      | -0.474939000 | -7.412886000 | -1.338907000 |
| C                      | 5.633153000  | 0.903986000  | -4.263647000 |
| H                      | 5.129280000  | 0.220966000  | -4.955403000 |
| H                      | 6.020516000  | 1.748531000  | -4.839640000 |
| C                      | -6.956011000 | 2.448171000  | -1.710813000 |
| H                      | -7.089224000 | 2.914679000  | -0.731008000 |
| H                      | -7.578845000 | 2.991707000  | -2.426275000 |
| C                      | 6.710703000  | 0.171810000  | -3.461309000 |
| H                      | 7.299835000  | -0.529084000 | -4.058811000 |
| H                      | 7.398457000  | 0.890198000  | -3.002047000 |
| H                      | 3.644452000  | -3.165512000 | -1.785114000 |
| H                      | -0.075870000 | 2.447315000  | 3.109226000  |
| H                      | -0.326724000 | -2.189680000 | -3.229444000 |
| H                      | 3.102477000  | 3.507941000  | -1.313422000 |
| complex 5 (dispersion) |              |              |              |
| Yb                     | 12.227244000 | 5.930220000  | 8.833135000  |

|    |              |              |              |
|----|--------------|--------------|--------------|
| Yb | 15.954481000 | 4.899189000  | 8.057667000  |
| Yb | 13.134328000 | 9.753755000  | 8.262443000  |
| P  | 14.551650000 | 7.320099000  | 7.948418000  |
| P  | 13.675761000 | 3.476015000  | 8.774010000  |
| P  | 15.736482000 | 4.727347000  | 5.252789000  |
| N  | 18.829589000 | 5.759652000  | 9.995798000  |
| N  | 17.767737000 | 4.189779000  | 10.966785000 |
| C  | 16.100423000 | 8.187153000  | 10.214827000 |
| C  | 17.777588000 | 4.922870000  | 9.823499000  |
| C  | 16.937131000 | 3.645856000  | 4.351784000  |
| C  | 18.083355000 | 3.112570000  | 5.007686000  |
| C  | 13.683338000 | 2.273400000  | 10.171465000 |
| C  | 13.284196000 | 2.670064000  | 11.482041000 |
| N  | 14.148326000 | 12.953947000 | 9.533647000  |
| C  | 17.069915000 | 8.969164000  | 10.846496000 |
| H  | 17.218454000 | 8.864449000  | 11.917165000 |
| N  | 12.043278000 | 12.724967000 | 9.748487000  |
| C  | 16.722598000 | 9.219368000  | 8.080592000  |
| C  | 15.288250000 | 7.214383000  | 11.046695000 |
| H  | 15.077191000 | 6.349965000  | 10.397944000 |
| C  | 15.884921000 | 8.310036000  | 8.804401000  |
| C  | 16.002516000 | 6.711327000  | 12.299920000 |
| H  | 17.028804000 | 6.405019000  | 12.089372000 |
| H  | 15.461821000 | 5.853469000  | 12.709586000 |
| H  | 16.030282000 | 7.475353000  | 13.085613000 |
| C  | 19.861189000 | 3.534204000  | 6.812772000  |
| H  | 19.971648000 | 3.916438000  | 7.833250000  |
| H  | 20.393255000 | 4.202327000  | 6.129092000  |
| H  | 20.352833000 | 2.555637000  | 6.780377000  |
| C  | 16.628215000 | 9.341890000  | 6.572685000  |
| H  | 15.581395000 | 9.128043000  | 6.313298000  |
| C  | 19.459406000 | 5.574911000  | 11.220294000 |
| C  | 12.831819000 | 4.094447000  | 11.752354000 |
| H  | 13.510234000 | 4.732306000  | 11.159690000 |
| C  | 18.378125000 | 3.446910000  | 6.457774000  |
| H  | 17.952194000 | 4.456598000  | 6.600413000  |
| C  | 16.729174000 | 3.288345000  | 2.987012000  |
| C  | 18.930566000 | 2.225132000  | 4.339789000  |
| H  | 19.792317000 | 1.815864000  | 4.860011000  |
| C  | 17.683533000 | 9.976188000  | 8.758069000  |
| H  | 18.306866000 | 10.664360000 | 8.194072000  |
| C  | 18.780578000 | 4.563409000  | 11.841268000 |
| C  | 17.858216000 | 9.870693000  | 10.134698000 |

|   |              |              |              |
|---|--------------|--------------|--------------|
| H | 18.605054000 | 10.473892000 | 10.644458000 |
| C | 14.128996000 | 0.933666000  | 9.985214000  |
| C | 13.942715000 | 7.822875000  | 11.438313000 |
| H | 14.095174000 | 8.688024000  | 12.089629000 |
| H | 13.326546000 | 7.103318000  | 11.987311000 |
| H | 13.360243000 | 8.142081000  | 10.565422000 |
| C | 17.663977000 | 2.459915000  | 7.387644000  |
| H | 16.576738000 | 2.485609000  | 7.229508000  |
| H | 17.871321000 | 2.671993000  | 8.442647000  |
| H | 17.989652000 | 1.435682000  | 7.180321000  |
| C | 17.596267000 | 2.396403000  | 2.355372000  |
| H | 17.419361000 | 2.128626000  | 1.317277000  |
| C | 19.227377000 | 6.746415000  | 9.012535000  |
| H | 20.254301000 | 6.567796000  | 8.681344000  |
| H | 19.133374000 | 7.755420000  | 9.417989000  |
| H | 18.563200000 | 6.662778000  | 8.153545000  |
| C | 16.765896000 | 3.178441000  | 11.252080000 |
| H | 16.222238000 | 3.416857000  | 12.168985000 |
| H | 17.220144000 | 2.189417000  | 11.352879000 |
| H | 16.039372000 | 3.154387000  | 10.436563000 |
| C | 15.596068000 | 3.918304000  | 2.206334000  |
| H | 14.777900000 | 4.040869000  | 2.925382000  |
| C | 16.012612000 | 5.320466000  | 1.748450000  |
| H | 16.328500000 | 5.915853000  | 2.611316000  |
| H | 15.184434000 | 5.836631000  | 1.248862000  |
| H | 16.850800000 | 5.263283000  | 1.044710000  |
| C | 13.160243000 | 12.031775000 | 9.404986000  |
| C | 18.689752000 | 1.847281000  | 3.022763000  |
| H | 19.355020000 | 1.152989000  | 2.516603000  |
| C | 14.145192000 | 0.045311000  | 11.061228000 |
| H | 14.482596000 | -0.975742000 | 10.905593000 |
| C | 20.606273000 | 6.407563000  | 11.663395000 |
| H | 20.332710000 | 7.468335000  | 11.697731000 |
| H | 21.467202000 | 6.309726000  | 10.992296000 |
| H | 20.928212000 | 6.111570000  | 12.663874000 |
| C | 18.957860000 | 3.939758000  | 13.177339000 |
| H | 19.824797000 | 4.366766000  | 13.685710000 |
| H | 19.112244000 | 2.857735000  | 13.102755000 |
| H | 18.081302000 | 4.103518000  | 13.814601000 |
| C | 13.673269000 | 14.190031000 | 9.942783000  |
| C | 14.563963000 | 0.457997000  | 8.614217000  |
| H | 14.973595000 | 1.345891000  | 8.113733000  |
| C | 11.404704000 | 4.319786000  | 11.232570000 |

|   |              |              |              |
|---|--------------|--------------|--------------|
| H | 11.112456000 | 5.382077000  | 11.260827000 |
| H | 10.677952000 | 3.780674000  | 11.848341000 |
| H | 11.313285000 | 3.920682000  | 10.213449000 |
| C | 12.920013000 | 4.525702000  | 13.213921000 |
| H | 12.698234000 | 5.592826000  | 13.311409000 |
| H | 13.916436000 | 4.345332000  | 13.629140000 |
| H | 12.195144000 | 3.992727000  | 13.838813000 |
| C | 12.321859000 | 14.043312000 | 10.081589000 |
| C | 13.315967000 | 1.747652000  | 12.530253000 |
| H | 13.007624000 | 2.054570000  | 13.525061000 |
| C | 10.710261000 | 12.152239000 | 9.738229000  |
| H | 10.068822000 | 12.680117000 | 9.029290000  |
| H | 10.253976000 | 12.185267000 | 10.730154000 |
| H | 10.778639000 | 11.104507000 | 9.437615000  |
| C | 15.084642000 | 3.096399000  | 1.027327000  |
| H | 15.815319000 | 3.039088000  | 0.211658000  |
| H | 14.182950000 | 3.561613000  | 0.614033000  |
| H | 14.833820000 | 2.076714000  | 1.331442000  |
| C | 15.646005000 | -0.618421000 | 8.636259000  |
| H | 16.493960000 | -0.315561000 | 9.258961000  |
| H | 16.020534000 | -0.801316000 | 7.623823000  |
| H | 15.273894000 | -1.576590000 | 9.016321000  |
| C | 13.738041000 | 0.437704000  | 12.331522000 |
| H | 13.753062000 | -0.266975000 | 13.158431000 |
| C | 17.521671000 | 8.300743000  | 5.889490000  |
| H | 18.575063000 | 8.459287000  | 6.150176000  |
| H | 17.438887000 | 8.367847000  | 4.797615000  |
| H | 17.239581000 | 7.278640000  | 6.169727000  |
| C | 14.563756000 | 15.349391000 | 10.196970000 |
| H | 15.167882000 | 15.597892000 | 9.317520000  |
| H | 15.241178000 | 15.143474000 | 11.032752000 |
| H | 13.973483000 | 16.230653000 | 10.456260000 |
| C | 15.536437000 | 12.678816000 | 9.240699000  |
| H | 15.659630000 | 11.607116000 | 9.086881000  |
| H | 16.166307000 | 12.975641000 | 10.081600000 |
| H | 15.852607000 | 13.206623000 | 8.336048000  |
| C | 16.904363000 | 10.741843000 | 6.030803000  |
| H | 16.294230000 | 11.490283000 | 6.543886000  |
| H | 16.638842000 | 10.782403000 | 4.970351000  |
| H | 17.958000000 | 11.031856000 | 6.118886000  |
| C | 13.344465000 | 0.011778000  | 7.800788000  |
| H | 12.876535000 | -0.870237000 | 8.252449000  |
| H | 13.612229000 | -0.232851000 | 6.766311000  |

|    |              |              |              |
|----|--------------|--------------|--------------|
| H  | 12.600030000 | 0.814794000  | 7.786247000  |
| C  | 11.274327000 | 14.998776000 | 10.521225000 |
| H  | 10.776509000 | 14.656543000 | 11.435800000 |
| H  | 10.500149000 | 15.134180000 | 9.757595000  |
| H  | 11.715546000 | 15.976035000 | 10.727206000 |
| Yb | 14.240237000 | 7.105401000  | 5.126722000  |
| Yb | 10.690296000 | 8.330460000  | 6.034940000  |
| Yb | 13.385486000 | 3.321532000  | 5.982012000  |
| P  | 11.872303000 | 5.749324000  | 5.993930000  |
| P  | 13.079245000 | 9.690345000  | 5.478617000  |
| P  | 10.761906000 | 8.325803000  | 8.869897000  |
| N  | 7.810247000  | 7.294907000  | 4.383402000  |
| N  | 8.533192000  | 8.903841000  | 3.192438000  |
| C  | 10.233838000 | 4.929717000  | 3.775509000  |
| C  | 8.783556000  | 8.239653000  | 4.349604000  |
| C  | 9.350808000  | 9.134144000  | 9.756939000  |
| C  | 8.258401000  | 9.713408000  | 9.049248000  |
| C  | 12.598731000 | 10.833109000 | 4.110341000  |
| C  | 12.785585000 | 10.461109000 | 2.742984000  |
| N  | 12.694733000 | 1.118481000  | 3.188716000  |
| C  | 9.204793000  | 4.195689000  | 3.183721000  |
| H  | 8.957632000  | 4.373232000  | 2.141803000  |
| N  | 14.602451000 | 0.693518000  | 4.025700000  |
| C  | 9.825800000  | 3.728996000  | 5.869633000  |
| C  | 11.017430000 | 5.914330000  | 2.932469000  |
| H  | 11.219940000 | 6.784836000  | 3.573846000  |
| C  | 10.559843000 | 4.727019000  | 5.153776000  |
| C  | 10.285708000 | 6.402031000  | 1.685569000  |
| H  | 9.268846000  | 6.728762000  | 1.915029000  |
| H  | 10.827605000 | 7.242743000  | 1.246223000  |
| H  | 10.227651000 | 5.622570000  | 0.916618000  |
| C  | 6.728374000  | 9.569517000  | 6.994832000  |
| H  | 6.745128000  | 9.319855000  | 5.929475000  |
| H  | 6.110466000  | 8.834490000  | 7.519501000  |
| H  | 6.241813000  | 10.546352000 | 7.089785000  |
| C  | 10.051874000 | 3.493607000  | 7.350829000  |
| H  | 11.105337000 | 3.737430000  | 7.565145000  |
| C  | 6.977591000  | 7.347783000  | 3.274468000  |
| C  | 13.411746000 | 9.124645000  | 2.376865000  |
| H  | 12.899460000 | 8.380068000  | 3.013866000  |
| C  | 8.154506000  | 9.585571000  | 7.541735000  |
| H  | 8.595052000  | 8.597292000  | 7.319470000  |
| C  | 9.353973000  | 9.253606000  | 11.172894000 |

|   |              |              |              |
|---|--------------|--------------|--------------|
| C | 7.275607000  | 10.431032000 | 9.734231000  |
| H | 6.457969000  | 10.881365000 | 9.178388000  |
| C | 8.821916000  | 2.997377000  | 5.225820000  |
| H | 8.277048000  | 2.242685000  | 5.785506000  |
| C | 7.439832000  | 8.382175000  | 2.509707000  |
| C | 8.496327000  | 3.226870000  | 3.892965000  |
| H | 7.709448000  | 2.654026000  | 3.409692000  |
| C | 12.031432000 | 12.115471000 | 4.378986000  |
| C | 12.373895000 | 5.316725000  | 2.553066000  |
| H | 12.248243000 | 4.447181000  | 1.899780000  |
| H | 12.992570000 | 6.044861000  | 2.019266000  |
| H | 12.924871000 | 4.996693000  | 3.444505000  |
| C | 8.973084000  | 10.677054000 | 6.845615000  |
| H | 10.016052000 | 10.664644000 | 7.188082000  |
| H | 8.950064000  | 10.573808000 | 5.753040000  |
| H | 8.566324000  | 11.662887000 | 7.089653000  |
| C | 8.349120000  | 9.972608000  | 11.822765000 |
| H | 8.381527000  | 10.065036000 | 12.906472000 |
| C | 7.633967000  | 6.369246000  | 5.483141000  |
| H | 6.736475000  | 6.619462000  | 6.056185000  |
| H | 7.573049000  | 5.344426000  | 5.115159000  |
| H | 8.500317000  | 6.436947000  | 6.140004000  |
| C | 9.357033000  | 9.989274000  | 2.696017000  |
| H | 9.869962000  | 9.698646000  | 1.776815000  |
| H | 8.752259000  | 10.878058000 | 2.501282000  |
| H | 10.115018000 | 10.238245000 | 3.438311000  |
| C | 10.466435000 | 8.658640000  | 12.010349000 |
| H | 11.066448000 | 8.051550000  | 11.322077000 |
| C | 9.949633000  | 7.748090000  | 13.124477000 |
| H | 9.313272000  | 6.957306000  | 12.715009000 |
| H | 10.785494000 | 7.274739000  | 13.652663000 |
| H | 9.361328000  | 8.295759000  | 13.869456000 |
| C | 13.484402000 | 1.431274000  | 4.248679000  |
| C | 7.316479000  | 10.578774000 | 11.116583000 |
| H | 6.546126000  | 11.143342000 | 11.634711000 |
| C | 11.613772000 | 12.931918000 | 3.327355000  |
| H | 11.169016000 | 13.898694000 | 3.546120000  |
| C | 5.871590000  | 6.380151000  | 3.063127000  |
| H | 6.254134000  | 5.353274000  | 3.043166000  |
| H | 5.120212000  | 6.438655000  | 3.858652000  |
| H | 5.369050000  | 6.574038000  | 2.113328000  |
| C | 6.986634000  | 8.904703000  | 1.195380000  |
| H | 6.121580000  | 8.340310000  | 0.840988000  |

|   |              |              |              |
|---|--------------|--------------|--------------|
| H | 6.695965000  | 9.959668000  | 1.253684000  |
| H | 7.774095000  | 8.821844000  | 0.437480000  |
| C | 13.299883000 | 0.216368000  | 2.321941000  |
| C | 11.957245000 | 12.644880000 | 5.797678000  |
| H | 11.794919000 | 11.770994000 | 6.444173000  |
| C | 14.910637000 | 9.087575000  | 2.711940000  |
| H | 15.331725000 | 8.084374000  | 2.553441000  |
| H | 15.463826000 | 9.771527000  | 2.060275000  |
| H | 15.076588000 | 9.408638000  | 3.747576000  |
| C | 13.222078000 | 8.712446000  | 0.919067000  |
| H | 13.590248000 | 7.694155000  | 0.761016000  |
| H | 12.171840000 | 8.744799000  | 0.615352000  |
| H | 13.785803000 | 9.364615000  | 0.242978000  |
| C | 14.526207000 | -0.053520000 | 2.859493000  |
| C | 12.373716000 | 11.322307000 | 1.723230000  |
| H | 12.516451000 | 11.035925000 | 0.686102000  |
| C | 15.740810000 | 0.657893000  | 4.919256000  |
| H | 15.785473000 | -0.302565000 | 5.440521000  |
| H | 16.666180000 | 0.828468000  | 4.368459000  |
| H | 15.634767000 | 1.458417000  | 5.649494000  |
| C | 11.368645000 | 9.766956000  | 12.553301000 |
| H | 10.797358000 | 10.477482000 | 13.162413000 |
| H | 12.172698000 | 9.363822000  | 13.177505000 |
| H | 11.824004000 | 10.319002000 | 11.724045000 |
| C | 10.834229000 | 13.645640000 | 6.056014000  |
| H | 9.863660000  | 13.260058000 | 5.730036000  |
| H | 10.776392000 | 13.864069000 | 7.127888000  |
| H | 11.006418000 | 14.601195000 | 5.547429000  |
| C | 11.771572000 | 12.545068000 | 2.000799000  |
| H | 11.447121000 | 13.195180000 | 1.192872000  |
| C | 9.185352000  | 4.454099000  | 8.176498000  |
| H | 8.125751000  | 4.323342000  | 7.928882000  |
| H | 9.295448000  | 4.263921000  | 9.249537000  |
| H | 9.449376000  | 5.503011000  | 7.988204000  |
| C | 12.659763000 | -0.247432000 | 1.064656000  |
| H | 11.696251000 | -0.734935000 | 1.251606000  |
| H | 12.481377000 | 0.585199000  | 0.374098000  |
| H | 13.303542000 | -0.967682000 | 0.555649000  |
| C | 11.370281000 | 1.666609000  | 2.993431000  |
| H | 11.148733000 | 2.351143000  | 3.810334000  |
| H | 11.311663000 | 2.219571000  | 2.053167000  |
| H | 10.617180000 | 0.874024000  | 2.989194000  |
| C | 9.850747000  | 2.049436000  | 7.805250000  |

|   |              |              |              |
|---|--------------|--------------|--------------|
| H | 10.364665000 | 1.346408000  | 7.141533000  |
| H | 10.266990000 | 1.921713000  | 8.809304000  |
| H | 8.792944000  | 1.764861000  | 7.843900000  |
| C | 13.312055000 | 13.250996000 | 6.182576000  |
| H | 13.577608000 | 14.056057000 | 5.488239000  |
| H | 13.282781000 | 13.664478000 | 7.195664000  |
| H | 14.090984000 | 12.483216000 | 6.135520000  |
| C | 15.650215000 | -0.894852000 | 2.376564000  |
| H | 16.552061000 | -0.288431000 | 2.235894000  |
| H | 15.894461000 | -1.695613000 | 3.083770000  |
| H | 15.397061000 | -1.357566000 | 1.420456000  |
| C | 15.801826000 | 12.056231000 | 12.567564000 |
| H | 16.548577000 | 11.359209000 | 12.200662000 |
| C | 14.449429000 | 11.750208000 | 12.422947000 |
| H | 14.152009000 | 10.825608000 | 11.941936000 |
| C | 16.184571000 | 13.257464000 | 13.164306000 |
| H | 17.238493000 | 13.496220000 | 13.279406000 |
| C | 15.213661000 | 14.151853000 | 13.617216000 |
| H | 15.511117000 | 15.086488000 | 14.084815000 |
| C | 13.479802000 | 12.642234000 | 12.876129000 |
| H | 12.429287000 | 12.400433000 | 12.755268000 |
| C | 13.861325000 | 13.843420000 | 13.471347000 |
| H | 13.104798000 | 14.540056000 | 13.821725    |

Complex 7 (S=1)

|    |              |              |              |
|----|--------------|--------------|--------------|
| Yb | -1.651043000 | 0.716334000  | 0.020382000  |
| Yb | 1.933476000  | 0.940148000  | -0.002144000 |
| Yb | 0.423697000  | -1.902302000 | -0.024980000 |
| P  | 0.337475000  | 1.657782000  | 2.162575000  |
| P  | 0.327034000  | 1.664039000  | -2.144023000 |
| P  | -3.635700000 | -1.126114000 | 0.021718000  |
| P  | 2.959059000  | -2.924544000 | -0.168776000 |
| N  | 0.376471000  | -1.302478000 | 2.234975000  |
| N  | 0.304329000  | -1.292883000 | -2.275348000 |
| N  | -1.473944000 | -3.111318000 | -0.020645000 |
| N  | 3.838987000  | -0.127618000 | 0.064646000  |
| N  | 2.898654000  | 4.535668000  | 0.006851000  |
| C  | 0.398640000  | -0.094549000 | -1.784839000 |
| C  | -5.292937000 | -2.037780000 | 0.016332000  |
| C  | -2.097296000 | -4.444682000 | -0.029834000 |
| C  | 0.455019000  | -0.091258000 | 1.770156000  |
| C  | 0.086517000  | -1.715907000 | 3.616215000  |
| C  | -2.060880000 | -1.931874000 | 0.003907000  |

|   |              |              |              |
|---|--------------|--------------|--------------|
| C | 0.009554000  | -1.688725000 | -3.659938000 |
| C | 0.323533000  | 2.301997000  | 3.944007000  |
| C | -2.964403000 | -4.680782000 | 1.221319000  |
| H | -3.775812000 | -3.947341000 | 1.240457000  |
| H | -2.355332000 | -4.520666000 | 2.119493000  |
| C | 1.038346000  | -1.141208000 | -4.661710000 |
| H | 2.040715000  | -1.476178000 | -4.365031000 |
| H | 1.027856000  | -0.049110000 | -4.630845000 |
| C | -1.394622000 | -1.203038000 | -4.063947000 |
| H | -1.426115000 | -0.107415000 | -4.018497000 |
| H | -2.123751000 | -1.582218000 | -3.337307000 |
| C | 3.049668000  | -1.184207000 | -0.037506000 |
| C | 5.033387000  | -4.480880000 | 1.069428000  |
| N | -4.741774000 | 2.910288000  | 0.048705000  |
| C | -2.974505000 | -4.669207000 | -1.275453000 |
| H | -2.374419000 | -4.499082000 | -2.177632000 |
| H | -3.787350000 | -3.937524000 | -1.279108000 |
| C | 4.542548000  | -3.948122000 | -0.150203000 |
| C | -5.965106000 | -2.295724000 | 1.239558000  |
| C | 0.099211000  | -3.251532000 | 3.660359000  |
| H | 1.086258000  | -3.608650000 | 3.341247000  |
| H | -0.629565000 | -3.634183000 | 2.936702000  |
| C | 2.725586000  | 3.380273000  | 0.018717000  |
| C | 0.044940000  | -3.223177000 | -3.724337000 |
| H | 1.041806000  | -3.567911000 | -3.422833000 |
| H | -0.666516000 | -3.624558000 | -2.993976000 |
| C | -0.893661000 | 2.766205000  | 4.507560000  |
| C | -5.346030000 | -1.962181000 | 2.590110000  |
| H | -4.263676000 | -1.884621000 | 2.433230000  |
| C | 1.541433000  | 2.441076000  | -4.657862000 |
| C | -3.538523000 | -6.107078000 | 1.220091000  |
| H | -4.150199000 | -6.250460000 | 2.121178000  |
| C | -5.323695000 | -1.991847000 | -2.559121000 |
| H | -4.240570000 | -1.939700000 | -2.397307000 |
| C | 0.340294000  | 2.363802000  | -3.902526000 |
| C | -1.303862000 | -1.216557000 | 4.047965000  |
| H | -2.049415000 | -1.576353000 | 3.327620000  |
| H | -1.321395000 | -0.120812000 | 4.018206000  |
| C | -1.731750000 | -1.685240000 | -5.484080000 |
| H | -2.734676000 | -1.330376000 | -5.757611000 |
| C | -0.963598000 | -5.485203000 | -0.038654000 |
| H | -0.326731000 | -5.329268000 | 0.842664000  |
| H | -0.332190000 | -5.321191000 | -0.922320000 |

|   |              |              |              |
|---|--------------|--------------|--------------|
| C | 6.181870000  | -5.281095000 | 1.050486000  |
| H | 6.565364000  | -5.688268000 | 1.982134000  |
| C | -1.528177000 | -6.913849000 | -0.042682000 |
| H | -0.698332000 | -7.632713000 | -0.048892000 |
| C | 5.814711000  | -0.837897000 | 1.388830000  |
| H | 5.519167000  | -1.887511000 | 1.305308000  |
| H | 5.333314000  | -0.432960000 | 2.289127000  |
| C | 4.307701000  | -4.281731000 | 2.392615000  |
| H | 3.650681000  | -3.411949000 | 2.268696000  |
| C | -0.850005000 | 2.925371000  | -4.432296000 |
| C | -5.955246000 | -2.308750000 | -1.209908000 |
| C | -3.547496000 | -6.096064000 | -1.283578000 |
| H | -4.165470000 | -6.231628000 | -2.181594000 |
| C | -4.409271000 | -6.306581000 | -0.029546000 |
| H | -5.246478000 | -5.597243000 | -0.023426000 |
| H | -4.839889000 | -7.317483000 | -0.032318000 |
| C | -1.698479000 | -3.221063000 | -5.526843000 |
| H | -1.959100000 | -3.576171000 | -6.533278000 |
| H | -2.445685000 | -3.634065000 | -4.836975000 |
| C | 5.181900000  | -4.288037000 | -1.370635000 |
| C | -2.148598000 | 2.966964000  | -3.640687000 |
| H | -2.104601000 | 2.148711000  | -2.910613000 |
| C | 1.141893000  | -1.197671000 | 4.606888000  |
| H | 1.152863000  | -0.105093000 | 4.585548000  |
| H | 2.132867000  | -1.547901000 | 4.289422000  |
| C | 0.702693000  | -1.621151000 | -6.084819000 |
| H | 1.443018000  | -1.214123000 | -6.786794000 |
| C | -2.397235000 | -7.113602000 | -1.294257000 |
| H | -1.788490000 | -6.986107000 | -2.199605000 |
| H | -2.796828000 | -8.136704000 | -1.318414000 |
| C | 3.116951000  | 5.950250000  | -0.033580000 |
| C | -0.295601000 | -3.714139000 | -5.139360000 |
| H | -0.271384000 | -4.811501000 | -5.158702000 |
| C | -2.388503000 | -7.124855000 | 1.213311000  |
| H | -2.787985000 | -8.148150000 | 1.230773000  |
| H | -1.773267000 | -7.005940000 | 2.115454000  |
| C | 2.880543000  | 1.927597000  | -4.143356000 |
| H | 2.668200000  | 1.204311000  | -3.347802000 |
| C | 6.835892000  | -5.574811000 | -0.139263000 |
| H | 7.729275000  | -6.194395000 | -0.133993000 |
| C | 1.520603000  | 2.403357000  | 4.702248000  |
| C | 3.415208000  | -5.499992000 | 2.676444000  |
| H | 2.685097000  | -5.649740000 | 1.875117000  |

|   |              |              |              |
|---|--------------|--------------|--------------|
| H | 2.868187000  | -5.373762000 | 3.617655000  |
| H | 4.017275000  | -6.412634000 | 2.756842000  |
| C | 6.328373000  | -5.090448000 | -1.338506000 |
| H | 6.826404000  | -5.349723000 | -2.268735000 |
| C | 5.302965000  | -0.068795000 | 0.158277000  |
| C | -5.593422000 | -3.028658000 | 3.662789000  |
| H | -6.645263000 | -3.077520000 | 3.967103000  |
| H | -5.011913000 | -2.797247000 | 4.561646000  |
| H | -5.299160000 | -4.023788000 | 3.315973000  |
| C | -3.691974000 | 2.393260000  | 0.042169000  |
| C | -0.698399000 | -1.122311000 | -6.472307000 |
| H | -0.941598000 | -1.441133000 | -7.495091000 |
| H | -0.723075000 | -0.025140000 | -6.461742000 |
| C | -5.771889000 | -0.607840000 | -3.048892000 |
| H | -6.860502000 | -0.571068000 | -3.176031000 |
| H | -5.309675000 | -0.367903000 | -4.013283000 |
| H | -5.482196000 | 0.165166000  | -2.330848000 |
| C | 0.732168000  | -3.155403000 | -6.134519000 |
| H | 1.737127000  | -3.522054000 | -5.886072000 |
| H | 0.506359000  | -3.506241000 | -7.150884000 |
| C | 0.827997000  | -3.224251000 | 6.058914000  |
| H | 1.823041000  | -3.602879000 | 5.788555000  |
| H | 0.614120000  | -3.584727000 | 7.074460000  |
| C | -6.016730000 | 4.791701000  | -0.797592000 |
| H | -5.693161000 | 4.553861000  | -1.817754000 |
| H | -5.280933000 | 5.484169000  | -0.371174000 |
| C | 5.237462000  | -4.007808000 | 3.579960000  |
| H | 5.837210000  | -4.884850000 | 3.848883000  |
| H | 4.646468000  | -3.743114000 | 4.463463000  |
| H | 5.924652000  | -3.181731000 | 3.374283000  |
| C | -5.592310000 | -3.053030000 | -3.631902000 |
| H | -5.330768000 | -4.056201000 | -3.282122000 |
| H | -4.996722000 | -2.839461000 | -4.525826000 |
| H | -6.642361000 | -3.070816000 | -3.945728000 |
| C | -6.470125000 | 3.830263000  | 1.486904000  |
| H | -5.740158000 | 4.517091000  | 1.931587000  |
| H | -6.466967000 | 2.911188000  | 2.083966000  |
| C | -0.224964000 | -3.755712000 | 5.074839000  |
| H | -0.216284000 | -4.853527000 | 5.079795000  |
| C | 2.892344000  | 2.051603000  | 4.141134000  |
| H | 2.736688000  | 1.394514000  | 3.278100000  |
| C | -6.048221000 | 3.498799000  | 0.041024000  |
| C | 5.970557000  | -0.634740000 | -1.107728000 |

|   |              |              |              |
|---|--------------|--------------|--------------|
| H | 5.599946000  | -0.084522000 | -1.983368000 |
| H | 5.677936000  | -1.681400000 | -1.229890000 |
| C | 3.723525000  | 1.211583000  | -5.206278000 |
| H | 4.118111000  | 1.906498000  | -5.956074000 |
| H | 3.151589000  | 0.441122000  | -5.729555000 |
| H | 4.585685000  | 0.729549000  | -4.733450000 |
| C | 0.820296000  | -1.688752000 | 6.029194000  |
| H | 1.577594000  | -1.301519000 | 6.724089000  |
| C | 1.517490000  | 3.056598000  | -5.914302000 |
| H | 2.433930000  | 3.115990000  | -6.494601000 |
| C | 5.715848000  | 1.405451000  | 0.302254000  |
| H | 5.232292000  | 1.829368000  | 1.193034000  |
| H | 5.344788000  | 1.969824000  | -0.564526000 |
| C | 4.613247000  | -3.885949000 | -2.724684000 |
| H | 3.946546000  | -3.031906000 | -2.553506000 |
| C | -2.187854000 | 2.817736000  | 3.709730000  |
| H | -2.120520000 | 2.039480000  | 2.938645000  |
| C | -1.624944000 | -1.711487000 | 5.467609000  |
| H | -2.617867000 | -1.345542000 | 5.762117000  |
| C | 3.685643000  | 3.080905000  | -3.528682000 |
| H | 4.635595000  | 2.718902000  | -3.118824000 |
| H | 3.125396000  | 3.562869000  | -2.723747000 |
| H | 3.912310000  | 3.839361000  | -4.287519000 |
| C | -0.823474000 | 3.528194000  | -5.695039000 |
| H | -1.734411000 | 3.957118000  | -6.102486000 |
| C | 7.343356000  | -0.722012000 | 1.492716000  |
| H | 7.690348000  | -1.283460000 | 2.370249000  |
| C | -2.231767000 | 4.282090000  | -2.852356000 |
| H | -2.228951000 | 5.141452000  | -3.532989000 |
| H | -1.378869000 | 4.384797000  | -2.173672000 |
| H | -3.147254000 | 4.323828000  | -2.253027000 |
| C | -7.418580000 | 5.421329000  | -0.806657000 |
| H | -7.387434000 | 6.339406000  | -1.406063000 |
| C | -3.447023000 | 2.537838000  | 4.535065000  |
| H | -3.679619000 | 3.353738000  | 5.228658000  |
| H | -3.348877000 | 1.616972000  | 5.117545000  |
| H | -4.309875000 | 2.425059000  | 3.871338000  |
| C | 2.368704000  | 6.622232000  | 1.135133000  |
| H | 2.725003000  | 6.205603000  | 2.084162000  |
| H | 1.298748000  | 6.395841000  | 1.059089000  |
| C | -7.259903000 | -2.826973000 | 1.212796000  |
| H | -7.775861000 | -3.026285000 | 2.148252000  |
| C | -0.899635000 | 3.270398000  | 5.812877000  |

|   |              |              |              |
|---|--------------|--------------|--------------|
| H | -1.831655000 | 3.619352000  | 6.247397000  |
| C | -0.567179000 | -1.174878000 | 6.444911000  |
| H | -0.797895000 | -1.502960000 | 7.467691000  |
| H | -0.576486000 | -0.077549000 | 6.447890000  |
| C | 3.806517000  | 1.314133000  | 5.126875000  |
| H | 4.132349000  | 1.959249000  | 5.950506000  |
| H | 4.711279000  | 0.975826000  | 4.610866000  |
| H | 3.317516000  | 0.437329000  | 5.558865000  |
| C | -7.249843000 | -2.840200000 | -1.187136000 |
| H | -7.758326000 | -3.050524000 | -2.124128000 |
| C | 7.987540000  | -1.302946000 | 0.223964000  |
| H | 9.082127000  | -1.244921000 | 0.297535000  |
| H | 7.725662000  | -2.363076000 | 0.120451000  |
| C | 4.119020000  | 8.420982000  | 1.201001000  |
| H | 4.499657000  | 8.047554000  | 2.160518000  |
| H | 4.300258000  | 9.503151000  | 1.185580000  |
| C | 3.579270000  | 3.329880000  | 3.639066000  |
| H | 2.966488000  | 3.827132000  | 2.882656000  |
| H | 4.556550000  | 3.102840000  | 3.198170000  |
| H | 3.736239000  | 4.032821000  | 4.465670000  |
| C | 1.463401000  | 2.915891000  | 6.003350000  |
| H | 2.376950000  | 2.988404000  | 6.586673000  |
| C | -3.406036000 | 2.754073000  | -4.489165000 |
| H | -4.278299000 | 2.631794000  | -3.838586000 |
| H | -3.323536000 | 1.857582000  | -5.110843000 |
| H | -3.613377000 | 3.604428000  | -5.148522000 |
| C | -2.293206000 | 4.171098000  | 2.990713000  |
| H | -3.206341000 | 4.224798000  | 2.388628000  |
| H | -1.439070000 | 4.329595000  | 2.324446000  |
| H | -2.312781000 | 4.991984000  | 3.716967000  |
| C | -7.839148000 | 5.753698000  | 0.633741000  |
| H | -7.140269000 | 6.475855000  | 1.075989000  |
| H | -8.829788000 | 6.225605000  | 0.635813000  |
| C | -7.870415000 | 4.464579000  | 1.469196000  |
| H | -8.161458000 | 4.697654000  | 2.500647000  |
| C | 2.613179000  | 8.139310000  | 1.080576000  |
| H | 2.079482000  | 8.609497000  | 1.915303000  |
| C | -8.873567000 | 3.475313000  | 0.855868000  |
| H | -8.920102000 | 2.559379000  | 1.458583000  |
| H | -9.880412000 | 3.911983000  | 0.860317000  |
| C | -1.613693000 | -3.247892000 | 5.491717000  |
| H | -2.378412000 | -3.641883000 | 4.809932000  |
| H | -1.862062000 | -3.611716000 | 6.498117000  |

|   |              |              |              |
|---|--------------|--------------|--------------|
| C | 7.499892000  | -0.517590000 | -1.003875000 |
| H | 7.957304000  | -0.933282000 | -1.911505000 |
| C | 4.628399000  | 6.229730000  | 0.087441000  |
| H | 5.156087000  | 5.726583000  | -0.731339000 |
| H | 5.000840000  | 5.808557000  | 1.028594000  |
| C | -5.830842000 | -0.587757000 | 3.072938000  |
| H | -5.557607000 | 0.190586000  | 2.353168000  |
| H | -5.379363000 | -0.332256000 | 4.038275000  |
| H | -6.920603000 | -0.577444000 | 3.195113000  |
| C | 0.348305000  | 3.593831000  | -6.436567000 |
| H | 0.351376000  | 4.063972000  | -7.416667000 |
| C | 0.265846000  | 3.337939000  | 6.564323000  |
| H | 0.242339000  | 3.726471000  | 7.579247000  |
| C | -7.901114000 | -3.102129000 | 0.011774000  |
| H | -8.906122000 | -3.517068000 | 0.009785000  |
| C | -8.450492000 | 3.143317000  | -0.583609000 |
| H | -9.157508000 | 2.429802000  | -1.023175000 |
| C | 5.670326000  | -3.462371000 | -3.750676000 |
| H | 6.332137000  | -2.685158000 | -3.357079000 |
| H | 5.180833000  | -3.067163000 | -4.647429000 |
| H | 6.295162000  | -4.302839000 | -4.073856000 |
| C | 7.737236000  | 0.755478000  | 1.637307000  |
| H | 8.827402000  | 0.851347000  | 1.731385000  |
| H | 7.299194000  | 1.175934000  | 2.552986000  |
| C | 3.758717000  | -5.035763000 | -3.280239000 |
| H | 4.368593000  | -5.933676000 | -3.433958000 |
| H | 3.313556000  | -4.761860000 | -4.243437000 |
| H | 2.949301000  | -5.294377000 | -2.590855000 |
| C | -8.420733000 | 4.431230000  | -1.421393000 |
| H | -9.420651000 | 4.881982000  | -1.453531000 |
| H | -8.140010000 | 4.202236000  | -2.457649000 |
| C | 7.242833000  | 1.536186000  | 0.409199000  |
| H | 7.510760000  | 2.596459000  | 0.512786000  |
| C | -7.052789000 | 2.504094000  | -0.574916000 |
| H | -7.049065000 | 1.574674000  | 0.005511000  |
| H | -6.736000000 | 2.252646000  | -1.593316000 |
| C | 2.089994000  | 8.696414000  | -0.252761000 |
| H | 1.010035000  | 8.519997000  | -0.339919000 |
| H | 2.240465000  | 9.782751000  | -0.290369000 |
| C | 4.862331000  | 7.748006000  | 0.036490000  |
| H | 5.938714000  | 7.939804000  | 0.122523000  |
| C | 2.590603000  | 6.505622000  | -1.372432000 |
| H | 1.522455000  | 6.277250000  | -1.465022000 |

|   |             |             |              |
|---|-------------|-------------|--------------|
| H | 3.104790000 | 6.006455000 | -2.201290000 |
| C | 7.892818000 | 0.960089000 | -0.858423000 |
| H | 7.566222000 | 1.527193000 | -1.741032000 |
| H | 8.985306000 | 1.059161000 | -0.801081000 |
| C | 2.833335000 | 8.022421000 | -1.416437000 |
| H | 2.457616000 | 8.408951000 | -2.371495000 |
| C | 4.339631000 | 8.303245000 | -1.297868000 |
| H | 4.525159000 | 9.383360000 | -1.352668000 |
| H | 4.878123000 | 7.843669000 | -2.136792000 |

Yb1 (S=0, open shell singlet)

|    |              |              |              |
|----|--------------|--------------|--------------|
| Yb | -1.647093000 | 0.627629000  | -0.007922000 |
| Yb | 1.910390000  | 1.024070000  | 0.027689000  |
| Yb | 0.542920000  | -1.891531000 | -0.017333000 |
| P  | 0.261589000  | 1.609851000  | 2.189878000  |
| P  | 0.299428000  | 1.709831000  | -2.128233000 |
| P  | -3.546590000 | -1.297557000 | -0.069201000 |
| P  | 3.131333000  | -2.778719000 | -0.179929000 |
| N  | 0.469304000  | -1.343198000 | 2.255830000  |
| N  | 0.404380000  | -1.244618000 | -2.257421000 |
| N  | -1.300234000 | -3.185053000 | 0.037393000  |
| N  | 3.867690000  | 0.059206000  | 0.045148000  |
| N  | 2.546397000  | 4.684138000  | 0.096026000  |
| C  | 0.454338000  | -0.041787000 | -1.768600000 |
| C  | -5.164379000 | -2.277886000 | -0.055788000 |
| C  | -1.870927000 | -4.541757000 | 0.063831000  |
| C  | 0.470736000  | -0.130291000 | 1.790403000  |
| C  | 0.203895000  | -1.772186000 | 3.637023000  |
| C  | -1.938022000 | -2.033209000 | -0.007313000 |
| C  | 0.135370000  | -1.642943000 | -3.646898000 |
| C  | 0.235408000  | 2.250413000  | 3.972370000  |
| C  | -2.758878000 | -4.772143000 | 1.300796000  |
| H  | -3.595401000 | -4.067801000 | 1.278382000  |
| H  | -2.178609000 | -4.563841000 | 2.207799000  |
| C  | 1.181438000  | -1.082051000 | -4.624253000 |
| H  | 2.179966000  | -1.409682000 | -4.306764000 |
| H  | 1.161778000  | 0.009948000  | -4.587159000 |
| C  | -1.265215000 | -1.174212000 | -4.079635000 |
| H  | -1.313924000 | -0.079901000 | -4.032055000 |
| H  | -2.004763000 | -1.567060000 | -3.370800000 |
| C  | 3.134134000  | -1.037478000 | -0.038059000 |
| C  | 5.316094000  | -4.170901000 | 1.069707000  |
| N  | -4.835350000 | 2.672218000  | 0.016043000  |

|   |              |              |              |
|---|--------------|--------------|--------------|
| C | -2.708522000 | -4.833676000 | -1.195324000 |
| H | -2.089204000 | -4.672510000 | -2.086294000 |
| H | -3.543256000 | -4.128688000 | -1.242759000 |
| C | 4.770151000  | -3.709517000 | -0.155358000 |
| C | -5.837001000 | -2.525248000 | 1.169559000  |
| C | 0.285183000  | -3.305417000 | 3.682346000  |
| H | 1.287070000  | -3.619274000 | 3.363544000  |
| H | -0.424989000 | -3.719384000 | 2.958074000  |
| C | 2.503147000  | 3.516635000  | 0.080571000  |
| C | 0.188459000  | -3.176994000 | -3.713135000 |
| H | 1.181323000  | -3.512837000 | -3.388156000 |
| H | -0.537792000 | -3.587654000 | -3.002180000 |
| C | -0.997033000 | 2.656123000  | 4.548417000  |
| C | -5.249268000 | -2.118091000 | 2.513902000  |
| H | -4.169575000 | -1.997300000 | 2.367157000  |
| C | 1.456594000  | 2.540545000  | -4.650129000 |
| C | -3.282921000 | -6.217335000 | 1.328912000  |
| H | -3.909465000 | -6.357065000 | 2.220309000  |
| C | -5.170984000 | -2.310261000 | -2.630178000 |
| H | -4.092375000 | -2.214903000 | -2.458396000 |
| C | 0.264723000  | 2.400123000  | -3.889941000 |
| C | -1.208608000 | -1.337336000 | 4.067525000  |
| H | -1.935685000 | -1.735678000 | 3.348398000  |
| H | -1.279463000 | -0.244093000 | 4.032881000  |
| C | -1.565622000 | -1.655235000 | -5.508423000 |
| H | -2.566525000 | -1.311486000 | -5.802811000 |
| C | -0.701932000 | -5.541151000 | 0.108261000  |
| H | -0.089029000 | -5.339891000 | 0.997141000  |
| H | -0.059177000 | -5.379191000 | -0.767797000 |
| C | 6.513990000  | -4.895185000 | 1.051972000  |
| H | 6.939515000  | -5.247234000 | 1.987825000  |
| C | -1.217730000 | -6.988415000 | 0.132874000  |
| H | -0.363654000 | -7.677594000 | 0.165946000  |
| C | 5.985373000  | -0.510722000 | 1.225226000  |
| H | 5.762585000  | -1.579663000 | 1.162744000  |
| H | 5.546570000  | -0.137466000 | 2.160379000  |
| C | 4.602541000  | -3.983365000 | 2.401559000  |
| H | 3.869952000  | -3.178790000 | 2.264258000  |
| C | -0.961718000 | 2.869393000  | -4.427805000 |
| C | -5.803589000 | -2.612551000 | -1.278414000 |
| C | -3.234937000 | -6.277885000 | -1.173659000 |
| H | -3.827769000 | -6.459262000 | -2.080489000 |
| C | -4.117349000 | -6.482510000 | 0.066857000  |

|   |              |              |              |
|---|--------------|--------------|--------------|
| H | -4.978826000 | -5.803661000 | 0.033521000  |
| H | -4.512840000 | -7.507565000 | 0.083874000  |
| C | -1.513225000 | -3.190253000 | -5.554941000 |
| H | -1.746888000 | -3.545523000 | -6.567921000 |
| H | -2.269941000 | -3.614701000 | -4.882682000 |
| C | 5.406430000  | -4.048492000 | -1.377971000 |
| C | -2.251336000 | 2.862976000  | -3.620523000 |
| H | -2.171506000 | 2.042101000  | -2.895928000 |
| C | 1.235079000  | -1.207371000 | 4.627454000  |
| H | 1.198795000  | -0.115384000 | 4.604367000  |
| H | 2.240374000  | -1.515032000 | 4.310679000  |
| C | 0.880462000  | -1.560277000 | -6.055837000 |
| H | 1.631007000  | -1.142891000 | -6.740631000 |
| C | -2.051417000 | -7.255117000 | -1.130407000 |
| H | -1.427688000 | -7.133503000 | -2.026351000 |
| H | -2.414978000 | -8.291872000 | -1.131838000 |
| C | 2.569955000  | 6.115543000  | 0.110584000  |
| C | -0.113814000 | -3.667781000 | -5.137509000 |
| H | -0.075984000 | -4.764721000 | -5.159220000 |
| C | -2.098084000 | -7.193635000 | 1.375974000  |
| H | -2.461933000 | -8.229518000 | 1.415078000  |
| H | -1.507766000 | -7.026959000 | 2.287119000  |
| C | 2.831079000  | 2.158057000  | -4.115175000 |
| H | 2.678845000  | 1.434066000  | -3.306985000 |
| C | 7.163993000  | -5.183776000 | -0.141072000 |
| H | 8.096212000  | -5.743215000 | -0.134868000 |
| C | 1.434637000  | 2.411924000  | 4.717361000  |
| C | 3.824561000  | -5.262410000 | 2.747561000  |
| H | 3.099068000  | -5.504867000 | 1.965038000  |
| H | 3.282116000  | -5.147176000 | 3.692808000  |
| H | 4.504619000  | -6.116028000 | 2.851580000  |
| C | 6.603147000  | -4.773767000 | -1.344424000 |
| H | 7.099216000  | -5.031380000 | -2.276057000 |
| C | 5.327635000  | 0.214166000  | 0.037818000  |
| C | -5.463988000 | -3.153878000 | 3.623033000  |
| H | -6.516271000 | -3.236130000 | 3.918261000  |
| H | -4.903452000 | -2.864577000 | 4.518467000  |
| H | -5.123626000 | -4.147719000 | 3.317374000  |
| C | -3.759594000 | 2.211599000  | 0.028650000  |
| C | -0.517707000 | -1.076447000 | -6.471803000 |
| H | -0.734472000 | -1.395039000 | -7.500625000 |
| H | -0.555828000 | 0.020260000  | -6.458438000 |
| C | -5.661292000 | -0.956518000 | -3.162697000 |

|   |              |              |              |
|---|--------------|--------------|--------------|
| H | -6.749577000 | -0.959215000 | -3.297446000 |
| H | -5.200603000 | -0.729659000 | -4.131029000 |
| H | -5.401267000 | -0.153253000 | -2.466674000 |
| C | 0.928788000  | -3.094028000 | -6.108576000 |
| H | 1.932397000  | -3.449939000 | -5.839997000 |
| H | 0.728298000  | -3.444619000 | -7.130333000 |
| C | 1.009566000  | -3.244587000 | 6.081813000  |
| H | 2.020313000  | -3.579999000 | 5.812852000  |
| H | 0.810433000  | -3.612517000 | 7.097699000  |
| C | -6.221697000 | 4.460474000  | -0.863546000 |
| H | -5.855865000 | 4.247329000  | -1.874886000 |
| H | -5.550230000 | 5.205717000  | -0.420008000 |
| C | 5.529550000  | -3.588837000 | 3.556969000  |
| H | 6.216663000  | -4.397231000 | 3.831698000  |
| H | 4.936537000  | -3.357879000 | 4.448645000  |
| H | 6.129533000  | -2.707068000 | 3.313505000  |
| C | -5.391071000 | -3.409839000 | -3.674708000 |
| H | -5.097199000 | -4.392747000 | -3.294265000 |
| H | -4.795275000 | -3.200217000 | -4.569318000 |
| H | -6.436777000 | -3.473829000 | -3.996887000 |
| C | -6.659735000 | 3.469197000  | 1.410814000  |
| H | -5.992786000 | 4.207310000  | 1.872302000  |
| H | -6.604674000 | 2.552987000  | 2.009589000  |
| C | -0.018622000 | -3.822194000 | 5.097513000  |
| H | 0.038461000  | -4.918565000 | 5.103118000  |
| C | 2.817846000  | 2.123911000  | 4.146975000  |
| H | 2.688119000  | 1.462843000  | 3.282879000  |
| C | -6.178961000 | 3.168616000  | -0.023387000 |
| C | 5.934934000  | -0.313401000 | -1.273814000 |
| H | 5.460449000  | 0.201155000  | -2.120395000 |
| H | 5.707091000  | -1.379008000 | -1.368916000 |
| C | 3.748929000  | 1.503793000  | -5.155050000 |
| H | 4.081122000  | 2.216179000  | -5.918534000 |
| H | 3.259473000  | 0.668937000  | -5.663313000 |
| H | 4.649614000  | 1.119542000  | -4.664920000 |
| C | 0.934992000  | -1.711054000 | 6.050276000  |
| H | 1.674054000  | -1.290204000 | 6.745252000  |
| C | 1.386483000  | 3.109105000  | -5.927005000 |
| H | 2.294752000  | 3.214102000  | -6.513478000 |
| C | 5.644755000  | 1.714214000  | 0.150989000  |
| H | 5.202609000  | 2.106841000  | 1.077098000  |
| H | 5.168785000  | 2.247657000  | -0.683467000 |
| C | 4.786089000  | -3.728824000 | -2.731627000 |

|   |              |              |              |
|---|--------------|--------------|--------------|
| H | 4.082346000  | -2.901791000 | -2.576862000 |
| C | -2.301608000 | 2.638457000  | 3.765800000  |
| H | -2.209276000 | 1.853513000  | 3.004350000  |
| C | -1.507271000 | -1.841957000 | 5.488295000  |
| H | -2.515230000 | -1.519236000 | 5.782400000  |
| C | 3.515603000  | 3.391757000  | -3.510459000 |
| H | 4.493968000  | 3.129254000  | -3.091877000 |
| H | 2.904545000  | 3.822455000  | -2.713115000 |
| H | 3.670836000  | 4.161716000  | -4.275525000 |
| C | -0.980733000 | 3.428632000  | -5.710325000 |
| H | -1.919055000 | 3.782854000  | -6.126734000 |
| C | 7.506765000  | -0.283999000 | 1.212878000  |
| H | 7.957350000  | -0.814152000 | 2.062204000  |
| C | -2.364750000 | 4.170494000  | -2.822550000 |
| H | -2.393616000 | 5.033128000  | -3.498392000 |
| H | -1.508615000 | 4.293509000  | -2.151295000 |
| H | -3.274972000 | 4.181935000  | -2.213950000 |
| C | -7.665419000 | 4.985636000  | -0.908733000 |
| H | -7.685863000 | 5.903702000  | -1.508675000 |
| C | -3.537386000 | 2.314468000  | 4.610265000  |
| H | -3.795459000 | 3.127013000  | 5.298760000  |
| H | -3.393647000 | 1.404577000  | 5.200718000  |
| H | -4.402642000 | 2.159810000  | 3.958151000  |
| C | 1.554706000  | 6.630950000  | 1.150796000  |
| H | 1.810148000  | 6.231330000  | 2.138946000  |
| H | 0.555222000  | 6.259677000  | 0.895855000  |
| C | -7.107741000 | -3.112165000 | 1.148280000  |
| H | -7.624068000 | -3.304981000 | 2.084917000  |
| C | -1.013185000 | 3.164450000  | 5.852054000  |
| H | -1.956249000 | 3.468421000  | 6.296247000  |
| C | -0.474017000 | -1.257918000 | 6.464582000  |
| H | -0.690420000 | -1.594384000 | 7.487749000  |
| H | -0.531337000 | -0.162022000 | 6.465841000  |
| C | 3.769543000  | 1.424855000  | 5.125669000  |
| H | 4.072016000  | 2.082477000  | 5.948328000  |
| H | 4.684655000  | 1.126916000  | 4.603114000  |
| H | 3.322274000  | 0.527174000  | 5.559589000  |
| C | -7.075148000 | -3.196702000 | -1.250123000 |
| H | -7.565924000 | -3.456446000 | -2.184089000 |
| C | 8.092583000  | -0.825885000 | -0.100542000 |
| H | 9.182256000  | -0.686290000 | -0.112247000 |
| H | 7.903336000  | -1.903256000 | -0.181207000 |
| C | 2.991924000  | 8.653850000  | 1.530587000  |

|   |               |              |              |
|---|---------------|--------------|--------------|
| H | 3.263065000   | 8.301303000  | 2.534074000  |
| H | 3.014518000   | 9.750543000  | 1.560281000  |
| C | 3.446583000   | 3.432916000  | 3.647602000  |
| H | 2.809120000   | 3.909027000  | 2.898170000  |
| H | 4.429513000   | 3.249631000  | 3.198896000  |
| H | 3.579456000   | 4.136682000  | 4.477688000  |
| C | 1.366253000   | 2.926667000  | 6.017097000  |
| H | 2.281450000   | 3.045817000  | 6.590174000  |
| C | -3.514330000  | 2.617974000  | -4.451208000 |
| H | -4.371005000  | 2.460845000  | -3.787564000 |
| H | -3.414388000  | 1.731154000  | -5.084027000 |
| H | -3.759605000  | 3.468922000  | -5.096721000 |
| C | -2.479330000  | 3.976162000  | 3.031480000  |
| H | -3.404672000  | 3.980628000  | 2.445771000  |
| H | -1.645332000  | 4.163920000  | 2.347404000  |
| H | -2.523352000  | 4.804956000  | 3.747667000  |
| C | -8.145230000  | 5.286833000  | 0.519920000  |
| H | -7.512889000  | 6.059014000  | 0.977563000  |
| H | -9.167743000  | 5.684267000  | 0.495886000  |
| C | -8.101941000  | 3.998934000  | 1.356915000  |
| H | -8.435480000  | 4.209615000  | 2.380282000  |
| C | 1.581865000   | 8.167981000  | 1.159904000  |
| H | 0.858685000   | 8.526003000  | 1.902575000  |
| C | -9.013796000  | 2.938441000  | 0.719947000  |
| H | -9.006775000  | 2.021154000  | 1.322228000  |
| H | -10.049941000 | 3.299593000  | 0.699218000  |
| C | -1.428615000  | -3.375932000 | 5.514479000  |
| H | -2.176147000  | -3.803961000 | 4.834090000  |
| H | -1.659882000  | -3.749187000 | 6.521499000  |
| C | 7.455228000   | -0.087020000 | -1.287831000 |
| H | 7.870378000   | -0.474175000 | -2.227857000 |
| C | 3.985732000   | 6.599658000  | 0.482457000  |
| H | 4.705919000   | 6.208613000  | -0.245939000 |
| H | 4.259574000   | 6.198908000  | 1.465371000  |
| C | -5.799793000  | -0.749596000 | 2.939969000  |
| H | -5.546002000  | 0.012971000  | 2.196444000  |
| H | -5.376282000  | -0.441469000 | 3.902565000  |
| H | -6.891050000  | -0.781215000 | 3.044263000  |
| C | 0.181135000   | 3.543898000  | -6.461787000 |
| H | 0.148488000   | 3.976762000  | -7.458381000 |
| C | 0.155942000   | 3.292291000  | 6.589906000  |
| H | 0.124785000   | 3.683288000  | 7.603682000  |
| C | -7.725353000  | -3.450621000 | -0.048967000 |

|   |              |              |              |
|---|--------------|--------------|--------------|
| H | -8.711741000 | -3.908064000 | -0.046285000 |
| C | -8.532292000 | 2.638875000  | -0.708253000 |
| H | -9.174085000 | 1.875342000  | -1.163545000 |
| C | 5.795883000  | -3.296675000 | -3.800701000 |
| H | 6.431117000  | -2.475964000 | -3.454108000 |
| H | 5.266112000  | -2.957600000 | -4.697477000 |
| H | 6.450199000  | -4.119693000 | -4.110036000 |
| C | 7.804383000  | 1.218358000  | 1.324957000  |
| H | 8.889157000  | 1.391074000  | 1.332878000  |
| H | 7.411284000  | 1.613418000  | 2.271725000  |
| C | 3.973542000  | -4.938063000 | -3.220207000 |
| H | 4.619721000  | -5.814194000 | -3.349428000 |
| H | 3.497735000  | -4.724765000 | -4.184088000 |
| H | 3.189620000  | -5.201639000 | -2.503734000 |
| C | -8.577021000 | 3.925676000  | -1.546921000 |
| H | -9.606148000 | 4.302129000  | -1.603930000 |
| H | -8.254778000 | 3.718601000  | -2.575714000 |
| C | 7.162141000  | 1.953890000  | 0.138551000  |
| H | 7.360943000  | 3.031143000  | 0.219405000  |
| C | -7.092507000 | 2.103728000  | -0.663307000 |
| H | -7.036455000 | 1.176945000  | -0.081717000 |
| H | -6.731860000 | 1.876279000  | -1.672758000 |
| C | 1.204886000  | 8.697188000  | -0.232556000 |
| H | 0.190095000  | 8.374841000  | -0.499616000 |
| H | 1.200691000  | 9.794554000  | -0.228193000 |
| C | 4.002236000  | 8.136730000  | 0.494279000  |
| H | 5.011569000  | 8.474046000  | 0.759401000  |
| C | 2.191581000  | 6.643505000  | -1.287838000 |
| H | 1.197133000  | 6.270956000  | -1.559444000 |
| H | 2.900453000  | 6.254696000  | -2.027584000 |
| C | 7.750830000  | 1.416143000  | -1.175125000 |
| H | 7.317106000  | 1.952354000  | -2.030418000 |
| H | 8.834545000  | 1.592877000  | -1.203093000 |
| C | 2.215597000  | 8.179966000  | -1.268107000 |
| H | 1.946013000  | 8.546547000  | -2.265907000 |
| C | 3.626199000  | 8.665169000  | -0.899072000 |
| H | 3.659698000  | 9.761945000  | -0.905226000 |
| H | 4.353276000  | 8.319101000  | -1.645141000 |

## References

1. P. L. Watson, T. H. Tulip and I. Williams, *Organometallics*, 1990, **9**, 1999–2009.
2. T. M. Klapötke, B. Krumm and R. Moll, *Z. Naturforsch. B*, 2013, **68**, 735–738.
3. P. B. Hitchcock, A. V. Khvostov and M. F. Lappert, *J. Organomet. Chem.*, 2002, **663**, 263–268.
4. R. T. Boéré and J. D. Masuda, *Can. J. Chem.*, 2002, **80**, 1607–1617.
5. F. Hanasaka, K. Fujita and R. Yamaguchi, *Organometallics*, 2005, **24**, 3422–3433.
6. A. G. Avent, M. A. Edelman, M. F. Lappert and G. A. Lawless, *J. Am. Chem. Soc.*, 1989, **111**, 3423–3425.
7. J. Van-Alphen, *Recl. Trav. Chim.*, 1937, **56**, 1007–1012.
8. CrysAlisPRO, version 1.171.42.73a; Rigaku Oxford Diffraction, 2022.
9. G. M. Sheldrick, *Acta Crystallogr.*, 2008, **64**, 112–122.
10. O. V. Dolomanov, L. J. Bourhis, R. J. Gildea, J. A. K. Howard and H. Puschmann, *J. Appl. Cryst.*, 2009, **42**, 339–341.
11. G. M. Sheldrick, *Acta Crystallogr.*, 2015, **71**, 3–8.
12. A. D. Becke, *J. Chem. Phys.*, 1993, **98**, 5648–5652.
13. D. Andrae, U. Häussermann, M. Dolg, H. Stoll and H. Preuss, *Theor. Chim. Acta*, 1990, **77**, 123–141.
14. J. M. L. Martin and A. Sundermann, *J. Chem. Phys.*, 2001, **114**, 3408–3420.
15. A. Höllwarth, M. Böhme, S. Dapprich, A. W. Ehlers, A. Gobbi, V. Jonas, K. F. Köhler, R. Stegmann, A. Veldkamp and G. Frenking, *Chem. Phys. Lett.*, 1993, **208**, 237–240.
16. R. Ditchfield, W. J. Hehre and J. A. Pople, *J. Chem. Phys.*, 1971, **54**, 724–728.
17. W. J. Hehre, R. Ditchfield and J. A. Pople, *J. Chem. Phys.*, 1972, **56**, 2257–2270.
18. P. C. Hariharan and J. A. Pople, *Theor. Chem. Acc.*, 1973, **28**, 213–223.
19. S. Grimme, S. Ehrlich and L. Goerigk, *J. Comp. Chem.*, 2011, **32**, 1456–1465.
20. M. J. Frisch, G. W. Trucks, H. B. Schlegel, G. E. Scuseria, M. A. Robb, J. R. Cheeseman,

G. Scalmani, V. Barone, B. Mennucci, G. A. Petersson, H. Nakatsuji, M. Caricato, X. Li, H. P. Hratchian, A. F. Izmaylov, J. Bloino, G. Zheng, J. L. Sonnenberg, M. Hada, M. Ehara, K. Toyota, R. Fukuda, J. Hasegawa, M. Ishida, T. Nakajima, Y. Honda, O. Kitao, H. Nakai, T. Vreven, J. A. Montgomery Jr., J. E. Peralta, F. Ogliaro, M. Bearpark, J. J. Heyd, E. Brothers, K. N. Kudin, V. N. Staroverov, R. Kobayashi, J. Normand, K. Raghavachari, A. Rendell, J. C. Burant, S. S. Iyengar, J. Tomasi, M. Cossi, N. Rega, J. M. Millam, M. Klene, J. E. Knox, J. B. Cross, V. Bakken, C. Adamo, J. Jaramillo, R. Gomperts, R. E. Stratmann, O. Yazyev, A. J. Austin, R. Cammi, C. Pomelli, J. W. Ochterski, R. L. Martin, K. Morokuma, V. G. Zakrzewski, G. A. Voth, P. Salvador, J. J. Dannenberg, S. Dapprich, A. D. Daniels, Ö. Farkas, J. B. Foresman, J. V. Ortiz, J. Cioslowski and D. J. Fox, Gaussian 09, Revision D.01; Gaussian Inc.: Wallingford, CT, 2009.

21. E. D. Glendening, J. K. Badenhoop, A. E. Reed, J. E. Carpenter, J. A. Bohmann, C. M. Morales, C. R. Landis and F. Weinhold, *NBO 6.0*.

22. T. Lu and F. Chen, *J. Comput. Chem.*, 2012, **33**, 580–592.
